# Supplementary material for: Comprehensive Analysis of Alteration Landscape and Its Clinical Significance of Mitochondrial Energy Metabolism Pathway‐Related Genes in Lung Cancers
Source: Hindawi journal article supplement (doi:10.1155/2021/9259297), 2021-01-01
Supplement: f3 [file 9259297.f3.pdf]

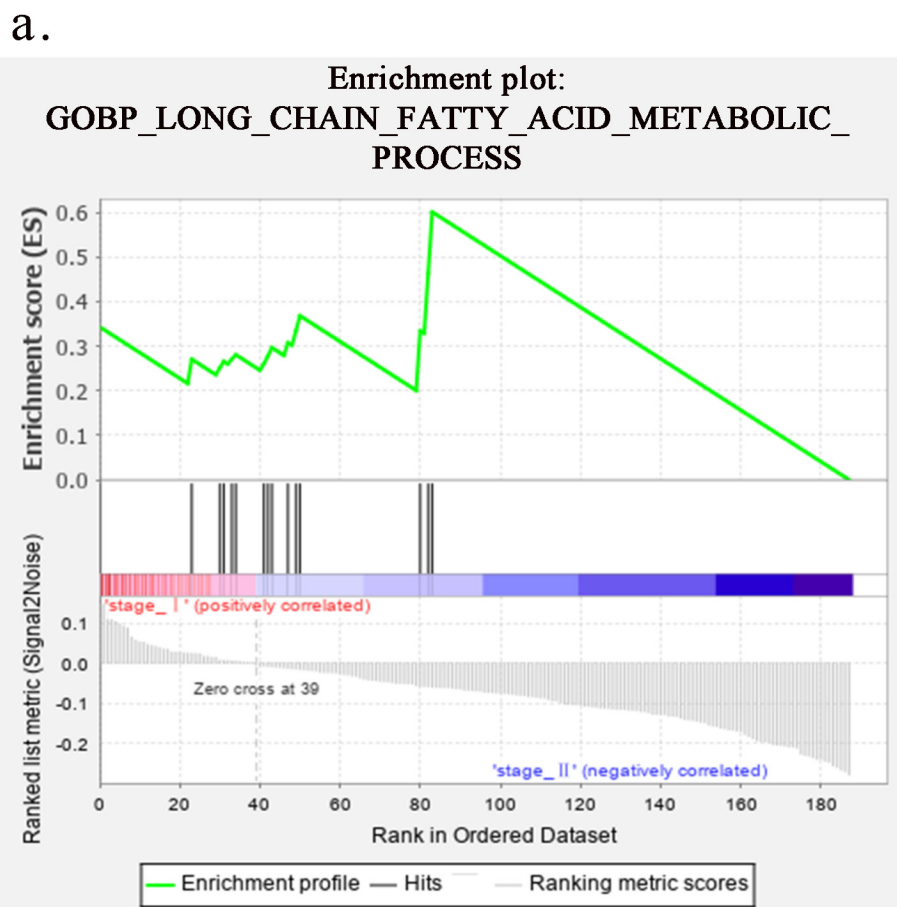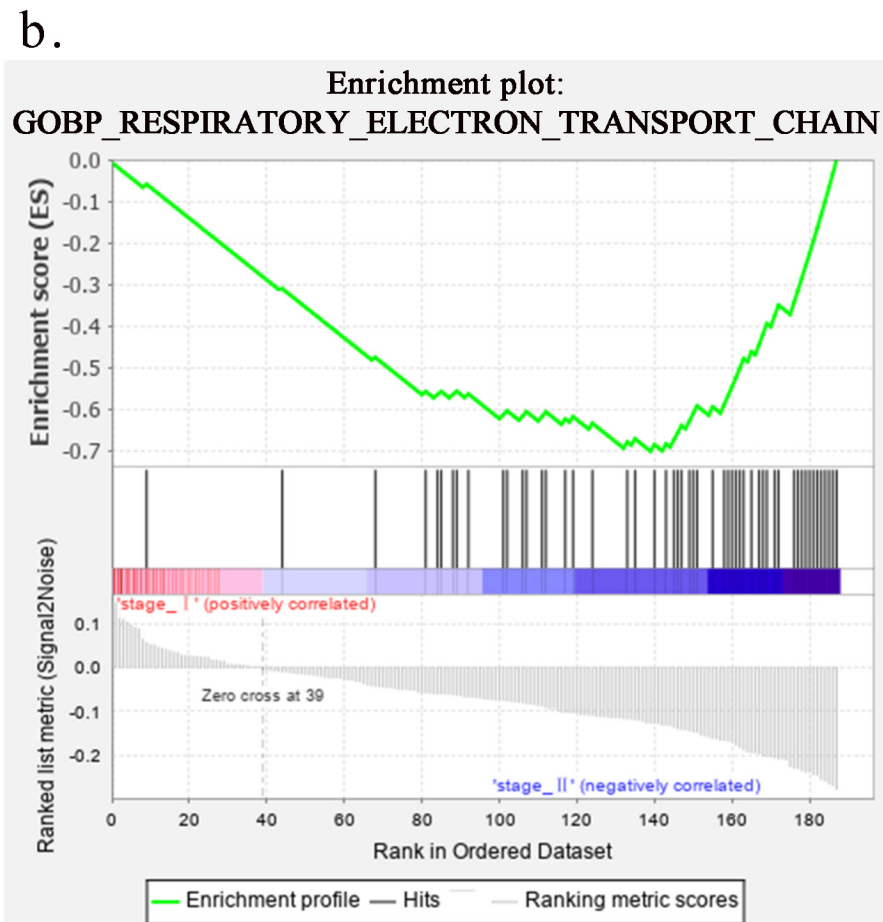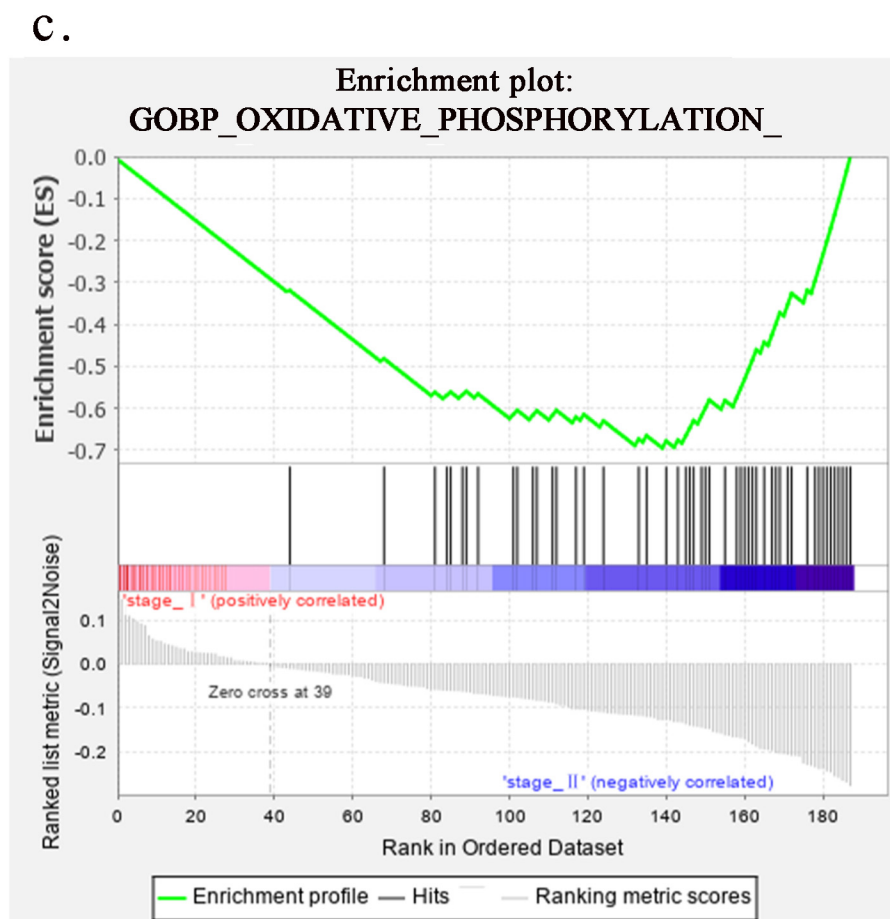

GSEA enrichment analysis for stage I vs.stage II lung cancer.
