# Supplementary material for: Comprehensive Analysis of Alteration Landscape and Its Clinical Significance of Mitochondrial Energy Metabolism Pathway‐Related Genes in Lung Cancers
Source: Hindawi journal article supplement (doi:10.1155/2021/9259297), 2021-01-01
Supplement: f5 [file 9259297.f5.pdf]

**a.**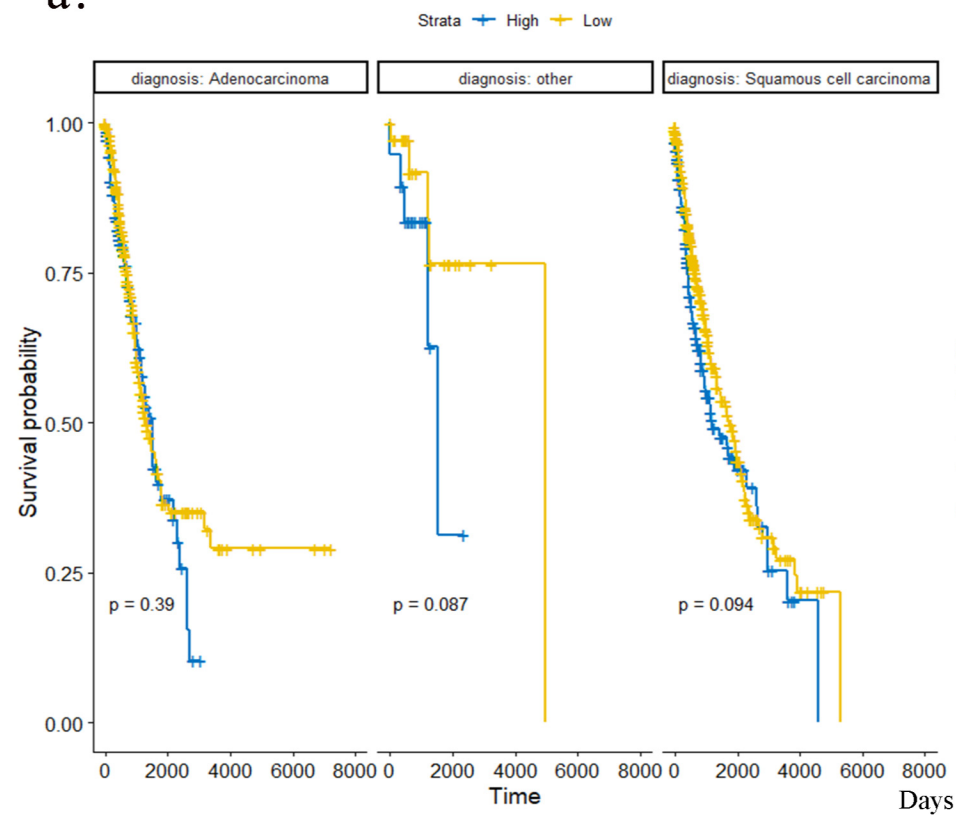**b.**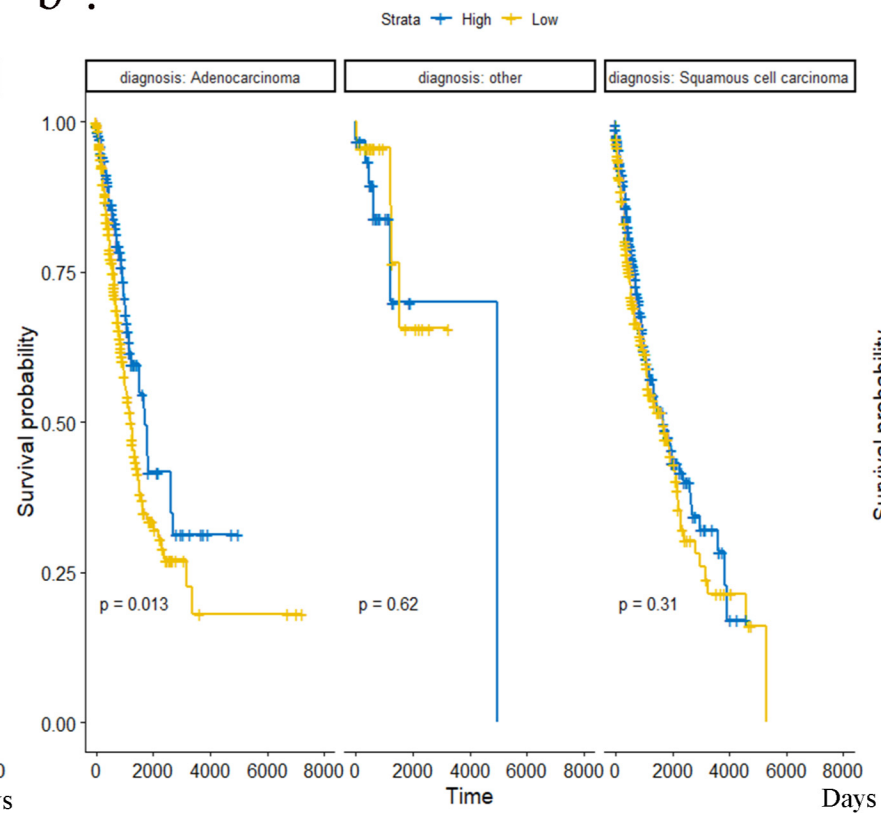**c.**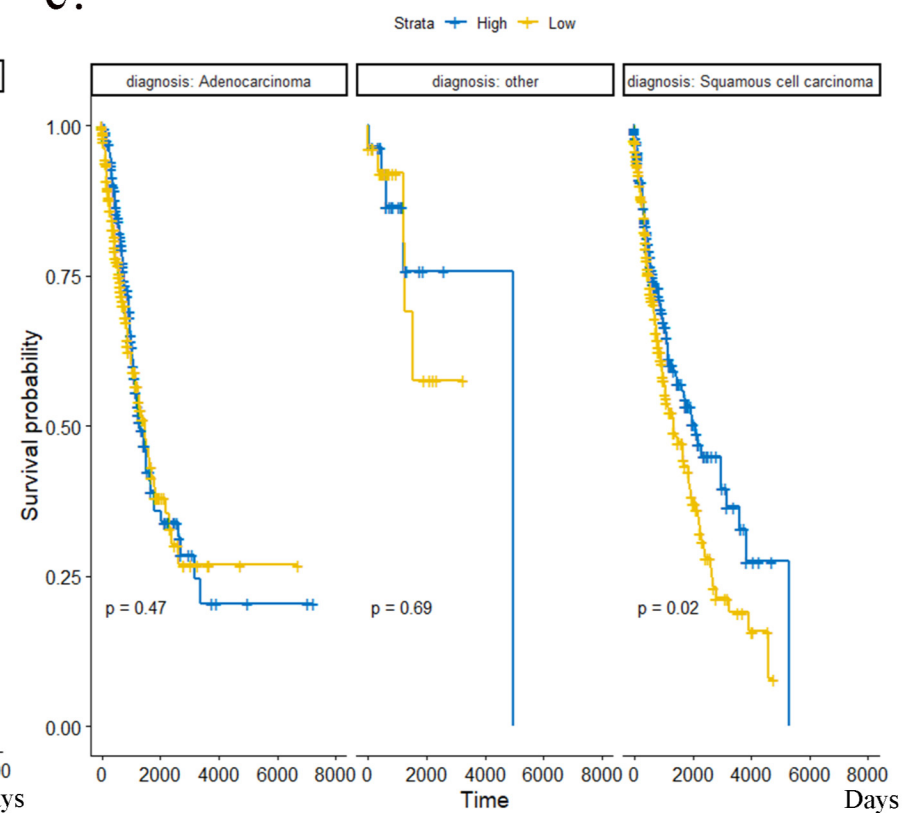

Survival analysis of three genes in lung cancer subgroup
