# Supplementary material for: Comprehensive Analysis of Alteration Landscape and Its Clinical Significance of Mitochondrial Energy Metabolism Pathway‐Related Genes in Lung Cancers
Source: Hindawi journal article supplement (doi:10.1155/2021/9259297), 2021-01-01
Supplement: f7 [file 9259297.f7.pdf]

# Hazard ratio

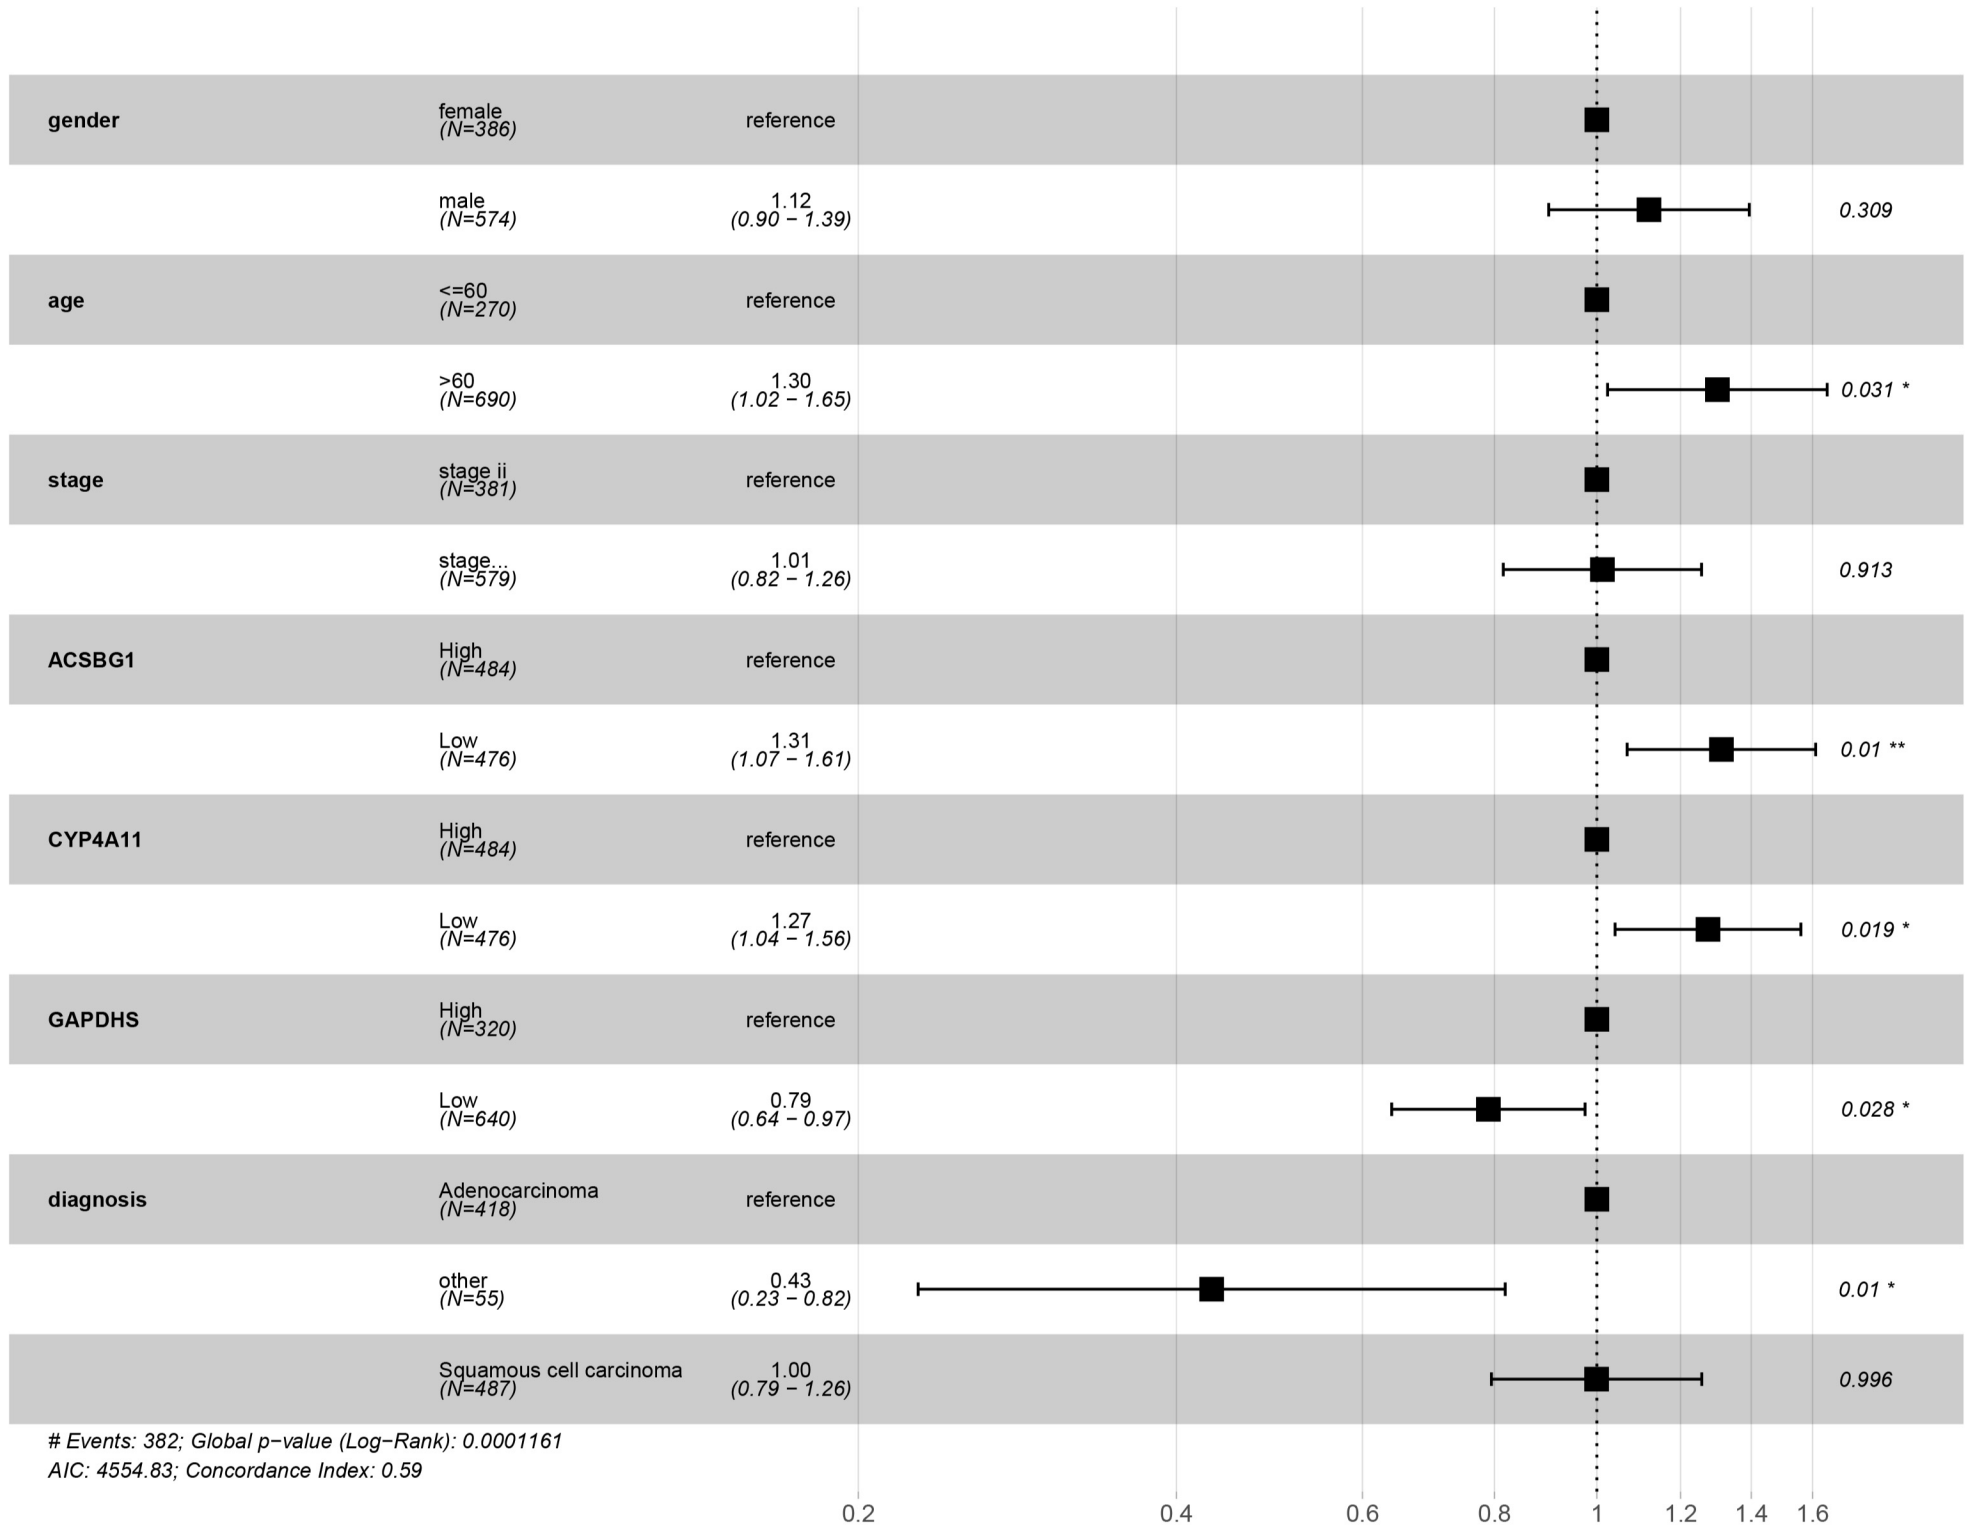

# Events: 382; Global p-value (Log-Rank): 0.0001161  
 AIC: 4554.83; Concordance Index: 0.59

Cox multivariate survival analysis of lung cancer.
