# Supplementary material for: Comprehensive Analysis of Alteration Landscape and Its Clinical Significance of Mitochondrial Energy Metabolism Pathway‐Related Genes in Lung Cancers
Source: Hindawi journal article supplement (doi:10.1155/2021/9259297), 2021-01-01
Supplement: f9 [file 9259297.f9.pdf]

## GAPDH5

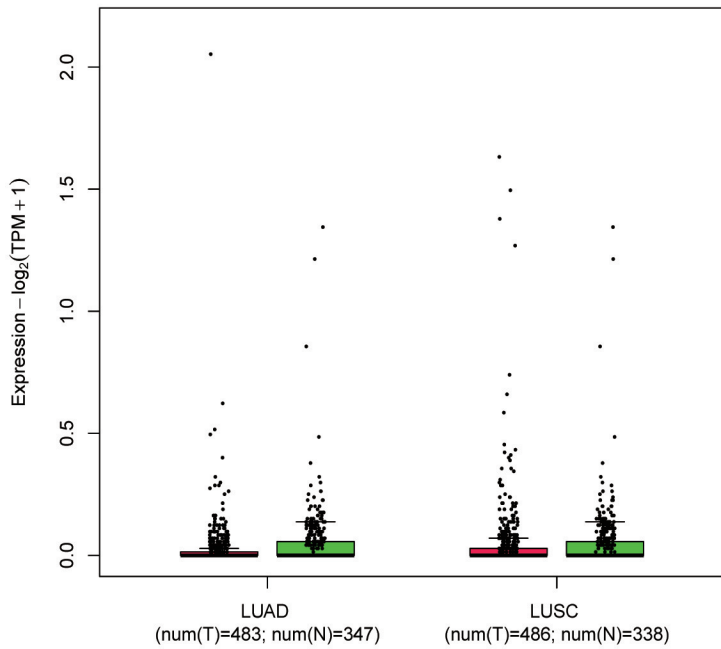

## ACSBG1

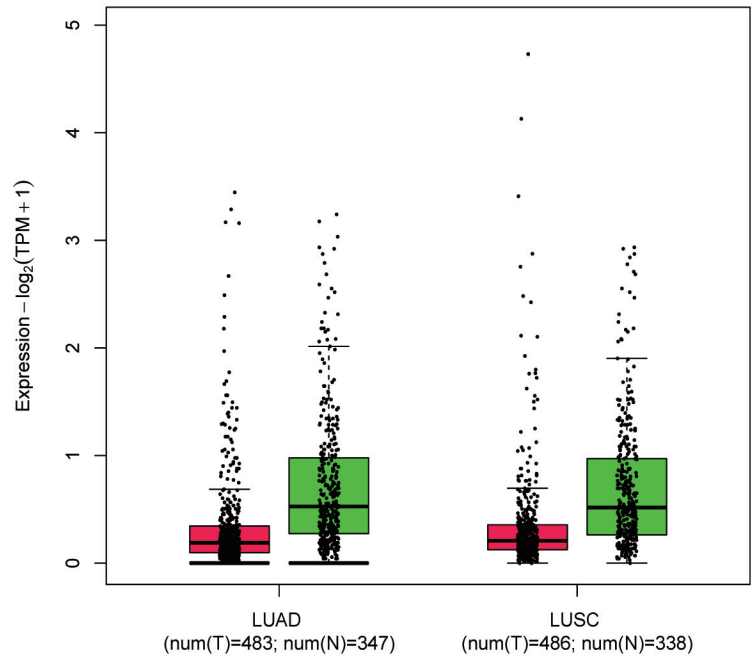

## CYP4A11

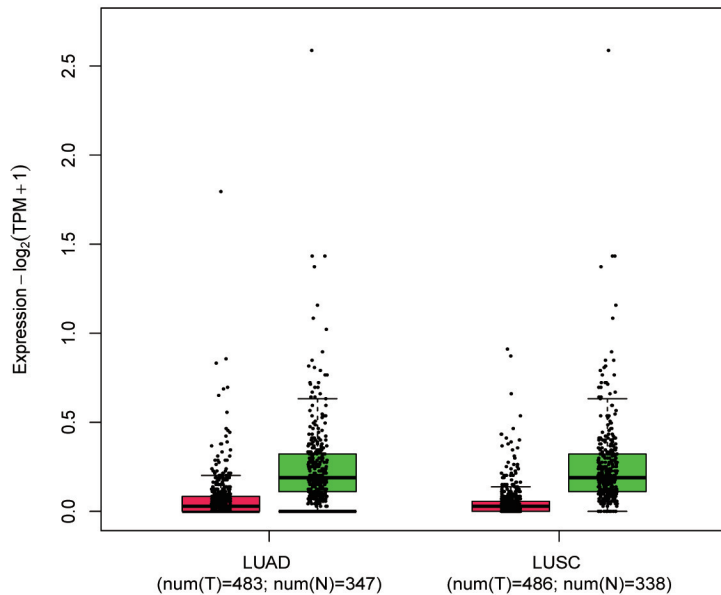

In different types of lung cancer, the expression of three genes in cancer group and normal group (red for cancer group, green for normal group)
