# Supplementary material for: Comprehensive Analysis of Alteration Landscape and Its Clinical Significance of Mitochondrial Energy Metabolism Pathway-Related Genes in Lung Cancers
Source: Oxid Med Cell Longev. 2021 Dec 20;2021:9259297. doi: 10.1155/2021/9259297 (PMC8713050; doi:10.1155/2021/9259297)
Supplement: Supplementary 10 — Supplementary Table 1: differential expression analysis of mitochondrial energy metabolism pathway-related genes between lung cancer and control groups. [file 9259297.f10.txt]

Supplementary Table 1. Differential expression analysis of mitochondrial energy metabolism pathway-related genes between lung cancer and control groups.
geneName	logFC	logCPM	F	PValue	FDR	FC
ACADL	-3.403613297	8.658529147	611.4228219	5.62E-108	1.06E-105	0.094495321
ALDH18A1	1.342820457	12.84204366	501.7306193	4.70E-92	4.42E-90	2.536467117
ADH1B	-3.949924988	12.42026029	488.1735917	5.19E-90	3.25E-88	0.064707422
PPAT	1.971714167	10.72453619	453.7045824	9.74E-85	4.58E-83	3.922338828
GAPDH	2.102508016	17.83675291	355.9154079	4.08E-69	1.53E-67	4.294553121
ALDH2	-1.671073653	13.87330885	331.8634494	4.11E-65	1.29E-63	0.314019564
ACSL4	-1.34928243	12.85278591	286.1846721	2.55E-57	6.85E-56	0.392487216
PPARG	-1.874534982	10.4619171	282.1447743	1.28E-56	3.01E-55	0.272714822
CYP2U1	-1.265773373	9.511762103	275.0988546	2.17E-55	4.53E-54	0.415876372
PFKP	1.849067146	13.48658902	258.3473012	1.92E-52	3.60E-51	3.60267159
ACSL1	-1.198353265	13.18373584	252.9825791	1.71E-51	2.93E-50	0.435772401
ADH1A	-2.472786755	3.827242291	248.4249719	1.11E-50	1.74E-49	0.180142844
GPI	1.497243463	15.20910391	236.6721647	1.41E-48	2.04E-47	2.823028049
ALDH3B2	3.968668601	11.10511671	231.5148613	1.20E-47	1.61E-46	15.65626962
NDUFS6	1.104661942	12.28504328	221.47646	7.92E-46	9.93E-45	2.150484811
CYP4A22-AS1	2.670820993	4.85752594	219.2822161	1.99E-45	2.34E-44	6.367914623
PC	1.761196706	11.55624586	206.5572142	4.26E-43	4.71E-42	3.389791894
MDH2	0.744237496	13.99835521	205.7539084	5.99E-43	6.26E-42	1.675088705
CYC1	1.074699554	13.22151807	201.1624469	4.21E-42	4.17E-41	2.106283386
PFKFB2	-1.031099461	11.67717465	180.9246031	2.49E-38	2.34E-37	0.489337089
ACAT1	-0.807088727	11.73731328	159.3636348	3.03E-34	2.71E-33	0.571534017
CPT1B	1.946991683	7.878024088	153.7815274	3.56E-33	3.04E-32	3.855697002
ACAA2	-1.06776269	11.65509643	151.6964735	8.96E-33	7.32E-32	0.47705824
CYP4A26P	-2.012558626	1.699981468	143.4189745	3.55E-31	2.78E-30	0.247833201
NDUFB4	0.703482462	12.69393692	139.0303236	2.52E-30	1.90E-29	1.628430854
ACAA1	-0.629010155	11.58195416	129.9116623	1.52E-28	1.10E-27	0.646619914
MDH1B	-1.530663597	7.179881294	124.645873	1.64E-27	1.14E-26	0.346118126
NDUFS8	0.619385429	12.38064423	120.8547157	9.19E-27	6.17E-26	1.53622063
NDUFAB1	0.505412861	11.79719435	114.9325825	1.37E-25	8.87E-25	1.41952953
ALDH3B1	-1.615967822	12.68932831	114.2940819	1.83E-25	1.15E-24	0.326246013
COX5A	0.612251955	12.52213636	112.0185688	5.19E-25	3.15E-24	1.528643463
ATP4A	5.061078058	5.759106661	104.9510308	1.34E-23	7.87E-23	33.38384121
OGDH	-0.550158554	13.49096024	104.2025486	1.89E-23	1.08E-22	0.682945068
COX5B	0.6610567	12.76446291	99.71759083	1.51E-22	8.17E-22	1.581240377
PFKP-DT	1.752207715	4.470669221	99.69532903	1.52E-22	8.17E-22	3.368736801
ACSBG1	-1.427374485	6.054757004	98.9159151	2.18E-22	1.14E-21	0.371806917
COX6C	0.629853608	12.82968243	96.37658328	7.10E-22	3.59E-21	1.547407968
NDUFB9	0.662748897	13.28859474	96.32872911	7.26E-22	3.59E-21	1.583096168
NDUFS2	0.47268468	12.90539959	93.92172186	2.22E-21	1.07E-20	1.387689388
ALDH1B1	0.829846379	11.47127348	90.78389992	9.62E-21	4.52E-20	1.777496081
ALDH1A2	-1.721673145	9.531472946	87.00451348	5.64E-20	2.59E-19	0.303196889
NDUFV1	0.442177229	13.13238493	84.11024304	2.20E-19	9.84E-19	1.358653179
SDHA	0.553961585	13.21507648	82.47252208	4.75E-19	2.08E-18	1.468111544
PPARGC1B	-0.940618354	9.49629919	80.83231581	1.03E-18	4.40E-18	0.521009522
NDUFA9	0.541072792	11.5898616	76.9955273	6.31E-18	2.64E-17	1.455054097
CYP4A11	-1.577350388	3.410122693	72.93541048	4.34E-17	1.74E-16	0.335096753
NDUFB11	0.438726138	12.5031752	72.92813992	4.35E-17	1.74E-16	1.35540701
NDUFA12	0.362606505	11.38052776	67.34074423	6.25E-16	2.45E-15	1.285746748
PFKFB4	0.976554512	10.33228837	67.03713845	7.23E-16	2.77E-15	1.967760327
IDH1	0.65205582	13.56796607	66.2908857	1.03E-15	3.88E-15	1.571405832
ACADSB	-0.696666672	11.40004059	63.02830989	4.94E-15	1.82E-14	0.616996123
ATP4B	3.777522849	6.241933387	60.6204425	1.57E-14	5.69E-14	13.7134803
ALDH3A1	3.1666248	13.85488013	59.99603083	2.13E-14	7.54E-14	8.979435804
PAAF1	0.445893556	10.65494784	59.95204197	2.17E-14	7.56E-14	1.362157529
ECHS1	0.34840198	12.97545939	59.08083729	3.31E-14	1.13E-13	1.273149625
ACADS	-0.514560175	10.75706127	58.78421001	3.82E-14	1.28E-13	0.700006306
PPAN	0.671355473	8.760339574	58.46552804	4.45E-14	1.47E-13	1.592568551
SDHC	0.361306504	12.79506617	58.01696448	5.53E-14	1.79E-13	1.284588694
MDH1	0.436086872	13.30539706	56.56381365	1.12E-13	3.56E-13	1.352929695
PGM2	0.767173678	11.66412841	55.624474	1.76E-13	5.51E-13	1.701932332
PFKFB3	-0.680363466	13.37607042	54.86734417	2.54E-13	7.82E-13	0.624008045
NDUFS5	0.434001199	12.98781482	53.05915368	6.11E-13	1.85E-12	1.350975207
NDUFB5	0.594894244	12.76832664	52.65725675	7.42E-13	2.22E-12	1.510361865
ALDH1L2	1.040063402	10.22791121	52.17482783	9.39E-13	2.76E-12	2.056318021
NDUFS3	0.298174244	12.07405375	50.38544738	2.24E-12	6.49E-12	1.229587364
PKLR	2.086437112	3.054798219	49.78631398	3.01E-12	8.56E-12	4.246979402
NDUFA8	0.341048148	11.42193179	49.12830989	4.14E-12	1.16E-11	1.266676527
HADHA	-0.244808489	13.84648458	48.25071417	6.36E-12	1.76E-11	0.843927816
PDHX	0.363803606	11.22687243	48.03688816	7.06E-12	1.92E-11	1.286814061
NDUFB3	0.336974429	11.25802044	43.25880774	7.36E-11	1.98E-10	1.263104874
ALDH1L1	1.672178915	9.092585477	42.85395503	8.98E-11	2.38E-10	3.186955589
CPT1A	-0.523545243	12.56808757	42.79829985	9.23E-11	2.41E-10	0.695660233
CYP4A22	-1.233929901	3.097464454	42.58772278	1.02E-10	2.64E-10	0.425157737
PPARGC1A	-1.174297678	9.210080576	41.79874251	1.51E-10	3.84E-10	0.443099413
CYP4A27P	-1.198533936	1.541178432	55.80964449	2.56E-10	6.42E-10	0.435717832
ADH1C	2.519751756	11.1378813	38.86072803	6.45E-10	1.59E-09	5.734834117
EHHADH	0.571448963	10.60881405	38.67979841	7.05E-10	1.72E-09	1.486015293
NDUFB10	0.275491539	12.0713701	38.55589678	7.50E-10	1.81E-09	1.210406415
OXCT2	1.090252471	4.871387726	36.86279269	1.74E-09	4.13E-09	2.129112927
OXCT1	0.677315012	11.33330055	35.16598852	4.03E-09	9.48E-09	1.599160798
ACADM	-0.338874435	11.60181747	34.57599964	5.41E-09	1.26E-08	0.790657929
ALDH4A1	0.559677679	10.38863469	34.36582326	6.01E-09	1.38E-08	1.473939879
CS	0.281903948	13.61873731	34.24931804	6.37E-09	1.44E-08	1.215798335
PDHB	-0.236787303	11.82424829	33.94797283	7.40E-09	1.66E-08	0.848633007
NDUFA7	0.358492101	7.542444901	33.61231387	8.75E-09	1.94E-08	1.282085167
NDUFA5	-0.243603716	11.99167492	31.29441977	2.79E-08	6.10E-08	0.844632862
COX7B	0.360976498	12.57904554	31.15896605	2.98E-08	6.45E-08	1.284294888
CPT1C	0.866982144	8.693716172	30.94909825	3.32E-08	7.08E-08	1.823843758
UQCRFS1	0.387536873	12.14269658	30.39324804	4.38E-08	9.25E-08	1.308158065
ACLY	0.333511809	13.77787907	29.44119585	7.07E-08	1.48E-07	1.260076924
GCDH	0.29243771	10.6391199	28.90213255	9.27E-08	1.91E-07	1.224707909
PFKL	0.31973877	13.77725069	28.24886469	1.29E-07	2.63E-07	1.248104533
IDH3G	0.25259615	12.00713073	27.94179929	1.50E-07	3.04E-07	1.191349036
ACOX2	-0.777328036	9.453747001	27.85182338	1.57E-07	3.15E-07	0.583446373
NDUFA10	0.254760847	12.55773041	27.6853083	1.71E-07	3.39E-07	1.193137942
PFKFB1	0.569022754	4.673000192	27.41985139	1.96E-07	3.83E-07	1.483518331
GAPDHS	1.253226642	2.302147155	26.80951873	2.66E-07	5.16E-07	2.383739596
ECI1	0.313526318	11.52952253	26.52822319	3.07E-07	5.89E-07	1.242741571
COX10	0.249731529	10.10492199	26.09641582	3.82E-07	7.25E-07	1.188985836
ALDH8A1	1.404495404	6.964827421	25.65961071	4.76E-07	8.95E-07	2.647251757
ALDH6A1	-0.429048421	11.26646617	25.40822417	5.41E-07	1.01E-06	0.742751531
NDUFA11	0.290421832	11.55886434	23.69736477	1.29E-06	2.37E-06	1.222997819
CYP4A44P	-0.921940574	1.510220783	40.52543348	1.30E-06	2.37E-06	0.527798599
ALDH9A1	-0.257434526	12.72218967	23.11232599	1.74E-06	3.14E-06	0.836574236
ADH4	1.513878351	4.820180214	22.33734343	2.58E-06	4.62E-06	2.855767148
NDUFA6	0.250635643	11.96484164	21.8660884	3.28E-06	5.82E-06	1.189731188
MINPP1	0.266595487	10.76477293	21.56260892	3.83E-06	6.73E-06	1.202965683
AKR1A1	0.226442329	13.15690839	21.50048817	3.96E-06	6.89E-06	1.169946314
ACO1	-0.373451484	12.25618555	21.05779989	4.96E-06	8.56E-06	0.771933523
NDUFV2	0.276359401	9.711363972	20.39452166	6.97E-06	1.18E-05	1.211134761
NDUFA13	0.283022557	11.00220841	20.39111792	6.98E-06	1.18E-05	1.216741383
NDUFA1	0.23893177	12.32450713	20.2987589	7.32E-06	1.23E-05	1.18011853
DLAT	0.227360876	11.86225267	19.82271589	9.35E-06	1.56E-05	1.170691441
PDC	0.939423284	3.151388573	18.71268625	1.66E-05	2.73E-05	1.917761462
ADPGK	-0.188795964	12.41404637	17.10370006	3.81E-05	6.22E-05	0.877337619
IDH3B	0.214367053	12.2789814	16.79217377	4.47E-05	7.25E-05	1.160194796
PPATP1	0.917851363	1.930728343	16.75027846	4.57E-05	7.34E-05	1.889299422
ATP12A	1.295492724	9.278527359	15.62347457	8.22E-05	1.31E-04	2.454608135
ECI2	-0.279817613	11.2581028	15.53115892	8.62E-05	1.36E-04	0.823695143
CPT2	-0.192298169	10.87232438	15.31373296	9.66E-05	1.51E-04	0.875210427
AHR	-0.35958515	13.92214559	14.78540905	1.27E-04	1.98E-04	0.779388662
MDH1P2	0.835645758	1.506233766	30.50262254	1.60E-04	2.47E-04	1.784655681
CYP4A43P	-0.722505342	1.481102847	36.03183031	2.20E-04	3.36E-04	0.606044089
HMGCL	-0.200426722	11.55863238	13.68033551	2.27E-04	3.45E-04	0.870293109
POR	-0.226853035	13.4911147	13.05534164	3.16E-04	4.75E-04	0.854496783
ACOX1	-0.189526513	12.60873724	11.77510217	6.22E-04	9.28E-04	0.876893467
GCK	0.71518116	5.530514979	11.49232683	7.23E-04	1.07E-03	1.641689352
DLST	-0.149757282	12.88421897	11.18799784	8.51E-04	1.25E-03	0.901402101
COX17	0.204712827	10.99417761	11.00615579	9.37E-04	1.37E-03	1.152456923
HADHB	-0.103631979	13.00305393	9.074374194	2.65E-03	3.83E-03	0.930687039
DLD	0.158351746	12.49428618	8.890678638	2.93E-03	4.20E-03	1.116011386
ACOX3	-0.192393631	10.40209414	8.789545517	3.09E-03	4.41E-03	0.875152517
ALDH1L1-AS1	0.645183287	1.783929104	8.19279065	4.28E-03	6.06E-03	1.563937963
SDHB	0.109014716	12.23475055	7.967561527	4.85E-03	6.80E-03	1.078491433
NDUFS1	0.123069446	12.69299449	7.35007913	6.81E-03	9.48E-03	1.089049437
ALDH3A2	-0.26645069	13.63527511	7.074150561	7.93E-03	1.10E-02	0.831362345
LHPP	0.193849515	10.74405393	6.972053073	8.39E-03	1.15E-02	1.143811658
PPARA	0.181826453	11.14559763	6.670071823	9.93E-03	1.35E-02	1.134319026
ACSL6	0.463947099	7.188226798	6.585976227	1.04E-02	1.41E-02	1.379310344
PPARD	0.164999225	12.34375817	5.529187344	1.89E-02	2.53E-02	1.121165476
ACSBG2	-0.285872232	4.103770796	5.246810478	2.22E-02	2.96E-02	0.820245551
NDUFB7	0.143127224	12.03415519	4.743814575	2.96E-02	3.92E-02	1.104296225
ALDH5A1	-0.17387234	11.15283793	4.386569637	3.64E-02	4.79E-02	0.886460136
HADH	-0.110019198	11.85515098	4.133153676	4.23E-02	5.52E-02	0.926575732
NDUFS7	-0.101761792	11.31226819	4.063096832	4.41E-02	5.69E-02	0.931894285
ACSL6-AS1	0.5355479	1.515331679	7.335564528	4.42E-02	5.69E-02	1.449492532
ALDH1A1	-0.353457773	13.88946582	3.967054247	4.66E-02	5.97E-02	0.782705901
PPA2	0.095164765	11.89761181	3.653369348	5.62E-02	7.14E-02	1.068187395
NDUFA4	-0.111242149	13.375426	3.579824126	5.87E-02	7.41E-02	0.92579062
COX15	0.077080091	11.57726476	3.354553081	6.73E-02	8.43E-02	1.054880877
PFKM	0.128872714	11.90625971	3.217527102	7.31E-02	9.10E-02	1.093438981
NDUFC2	0.086549574	11.26480773	2.898246685	8.90E-02	1.10E-01	1.06182762
BPGM	0.118601222	11.16068052	2.414554725	1.20E-01	1.48E-01	1.085681719
NDUFS4	-0.082520278	11.07011364	2.366145245	1.24E-01	1.52E-01	0.944406399
ADH6	0.292232208	6.764854402	2.291399091	1.30E-01	1.58E-01	1.224533471
NDUFV3	-0.064837038	11.40929568	2.284933945	1.31E-01	1.58E-01	0.956053304
ACSL3	0.094987435	12.93896199	2.218258672	1.37E-01	1.64E-01	1.068056106
ACAT2	0.131996095	11.40869535	2.20336472	1.38E-01	1.64E-01	1.0958088
ALDH16A1	0.094972074	11.43519092	1.791111597	1.81E-01	2.14E-01	1.068044734
SDHD	-0.065237679	12.28676552	1.744780753	1.87E-01	2.19E-01	0.955787842
NDUFB2	0.060917631	12.25898617	1.610856857	2.05E-01	2.39E-01	1.043129036
ACADVL	-0.067035851	13.967439	1.238488769	2.66E-01	3.07E-01	0.954597292
ACSL3-AS1	0.15104253	3.376436556	1.237285108	2.66E-01	3.07E-01	1.110371567
NDUFB6	0.068648181	11.18711397	1.171351679	2.79E-01	3.19E-01	1.04873355
NDUFC1	0.049662969	11.23372431	1.168812291	2.80E-01	3.19E-01	1.035023102
ALDH7A1P2	-0.125466676	1.476340952	2.016240812	3.12E-01	3.53E-01	0.916707463
COX7C	-0.054003012	13.54626768	0.998045245	3.18E-01	3.57E-01	0.963259883
GALM	-0.105201738	11.28862583	0.994812746	3.19E-01	3.57E-01	0.929674933
ALDH7A1P4	-0.147751492	1.445102686	6.791624053	3.27E-01	3.63E-01	0.902656199
PPATP2	0.05946673	1.434277499	14.81110016	3.51E-01	3.88E-01	1.0420805
ALDH7A1	-0.08862865	11.6676539	0.599464139	4.39E-01	4.83E-01	0.940416235
ALDH1A3	0.109935426	10.80442457	0.58686777	4.44E-01	4.84E-01	1.079179932
ACSL5	-0.136347659	12.99299238	0.583861015	4.45E-01	4.84E-01	0.90981955
PPAN-P2RY11	0.146516806	2.127041437	0.558873376	4.55E-01	4.91E-01	1.106893796
ALDH7A1P3	-0.112633443	1.475800978	1.169167226	4.93E-01	5.30E-01	0.924898244
NDUFB8	0.030640705	10.97683433	0.442757003	5.06E-01	5.40E-01	1.021465661
ALDH1L1-AS2	0.138841862	3.41634032	0.3527408	5.53E-01	5.87E-01	1.101020905
ALDH7A1P1	0.091177204	3.134999238	0.271613833	6.02E-01	6.36E-01	1.065239037
ACO2	-0.027707564	12.67463372	0.231942512	6.30E-01	6.62E-01	0.980977829
OXCT1-AS1	0.056052151	4.584624934	0.136774443	7.12E-01	7.43E-01	1.039617015
COX11	0.014484947	11.45911563	0.082214211	7.74E-01	7.98E-01	1.010090772
OXCT2P1	-0.047564327	4.517649287	0.081954294	7.75E-01	7.98E-01	0.967568477
NDUFA2	-0.017389577	11.67879432	0.080684735	7.76E-01	7.98E-01	0.988018817
IDH3A	0.015291872	10.76693709	0.063209374	8.02E-01	8.19E-01	1.010655892
NDUFA3	-0.008440547	11.35713093	0.023285557	8.79E-01	8.93E-01	0.99416654
NDUFB1	0.005893423	11.40492971	0.010196855	9.20E-01	9.29E-01	1.004093364
PPA1	0.004167573	13.54059608	0.005253602	9.42E-01	9.47E-01	1.002892918
MDH1P1	0.001946222	1.501239322	0.001424587	9.70E-01	9.70E-01	1.001349929
