# Supplementary material for: Comprehensive Analysis of Alteration Landscape and Its Clinical Significance of Mitochondrial Energy Metabolism Pathway-Related Genes in Lung Cancers
Source: Oxid Med Cell Longev. 2021 Dec 20;2021:9259297. doi: 10.1155/2021/9259297 (PMC8713050; doi:10.1155/2021/9259297)
Supplement: Supplementary 12 — Supplementary Table 3: correlation analysis between age and MMRGs in the lung cancer group. [file 9259297.f12.txt]

Supplementary Table 3. Correlation analysis between age and MMRGs in lung cancer group.
	age	ACAA2	ACADL	ACADM	ACADS	ACADSB	ACADVL	ACAT1	ACAT2	ACLY	ACO1	ACO2	ACOX1	ACOX2	ACOX3	ACSBG1	ACSBG2	ACSL1	ACSL3	ACSL3.AS1	ACSL4	ACSL5	ACSL6	ACSL6.AS1	ADH1A	ADH1B	ADH1C	ADH4	ADH6	ADPGK	AHR	AKR1A1	ALDH16A1	ALDH18A1	ALDH1A1	ALDH1A2	ALDH1A3	ALDH1B1	ALDH1L1	ALDH1L1.AS1	ALDH1L1.AS2	ALDH1L2	ALDH2	ALDH3A1	ALDH3A2	ALDH3B1	ALDH3B2	ALDH4A1	ALDH5A1
ACSBG2	-0.077756906	0.144262279	0.042089924	0.108303153	0.069357501	0.073484667	0.128521798	0.090226789	0.078713194	0.168923838	0.14774241	0.083453633	0.103341112	0.113036816	0.102705261	0.072480871	1	0.236044377	0.025485514	0.015457268	0.056115832	0.081356788	0.028559968	-0.002086269	0.037233252	0.056309208	0.007931466	-0.025251152	0.009778254	0.115356748	0.053033045	0.105454584	0.102877692	0.091660534	0.001104387	0.010462263	-0.035496	0.155297609	0.048223353	0.163450149	0.021749531	0.081166161	0.035955959	-0.02174525	0.024928892	0.021095993	-0.010144871	0.011741522	0.127777615
GCK	-0.066800602	0.073892811	-0.012953559	0.087509459	-0.011980905	-0.025996248	-0.007709795	0.048243209	0.088047848	0.143714488	0.015269553	0.065845165	0.022126558	-0.058846608	-0.019422935	0.040934787	0.096634529	0.025585627	0.009994141	0.05201478	-0.00121011	-0.0612604	0.013453545	-0.006297192	-0.016513987	-0.045554541	-0.030920312	-0.017146232	-0.019114054	0.058936935	0.028922763	0.039357061	0.035992646	0.033853962	0.028450613	-0.006530535	0.045205497	0.110741914	0.066311314	0.028495475	0.027094084	0.077877098	-0.069903459	0.056737448	-0.015090326	-0.055342568	0.051685927	0.027834252	0.018133269
GALM	-0.063974438	0.303409104	0.097864035	0.31670666	0.38418768	0.177590626	0.299170426	0.376464395	-0.099360462	0.21045418	0.399030671	0.025639653	0.348051854	0.505577116	0.345317308	-0.020166396	0.243862052	0.331324622	0.183681705	-0.0326641	0.238414205	0.46941386	0.014889163	0.005930143	0.00978722	0.130671664	0.059410022	0.028578602	0.156732262	0.170440324	0.205251275	0.358985851	-0.023537676	0.307899478	-0.007173721	0.148313949	-0.008748611	0.3120179	-0.005868508	0.040073906	-0.054914354	-0.013163615	0.41440645	-0.116945122	0.104611907	0.362383792	-0.140302342	-0.060312995	0.284767705
PFKP.DT	-0.057525237	0.204598389	0.058097102	0.197959611	0.191826031	0.022778818	0.30102986	0.23322276	-0.011312501	0.166457441	0.221448567	0.095295733	0.131344081	0.169128387	0.117177745	0.0083329	0.211251191	0.192536953	0.147601861	0.088928565	0.085497819	0.129456576	0.014877199	-0.016325933	-0.021454432	-0.06060564	-0.016766982	0.044763328	0.109134636	0.137352658	0.023063186	0.174999266	0.033863141	0.232613422	-0.007540599	0.073987723	-0.023128943	0.134600076	0.046936324	0.156195936	0.035119986	0.164465478	0.115321233	-0.052415612	0.070275837	0.185803039	-0.018436216	-0.058333687	0.064164553
PPAN.P2RY11	-0.044985279	-0.001026854	-0.026086036	0.03396416	0.061427864	0.092265902	0.112074858	0.049967736	0.105865355	0.158763616	0.038227076	0.170610401	0.00564726	0.007027687	0.027876597	-0.005941485	0.127847204	0.07584373	0.066681414	0.043194237	0.024014158	-0.079629945	-0.013376189	-0.026491589	-0.021466342	-0.049617662	0.000315463	-0.019231343	-0.036565343	0.18536583	0.05871724	0.138578168	0.221236421	0.142230823	0.042675998	-0.0253837	0.066685741	0.145833486	0.009667879	0.025621042	0.022393771	0.152111683	-0.010923891	0.097283266	0.047011919	-0.066405568	0.034581171	0.137528921	0.031028883
NDUFB9	-0.04294563	0.158732428	-0.066594362	0.298126863	0.27143785	0.141685836	0.250720133	0.319335145	0.410514505	0.297006726	0.114301971	0.387234473	0.249930035	0.006330631	0.198490064	0.023599158	0.013023863	0.130415275	0.238223643	0.221725109	0.144887777	0.028341411	0.082375996	-0.002122727	-0.037853179	-0.130010494	0.050987651	-0.024899555	0.035885729	0.327993976	0.080551904	0.433104759	0.258007972	0.372271746	0.121781762	0.007211301	0.022412654	0.255333554	0.153014326	0.065078311	0.080213784	0.169060331	0.034825977	0.176928918	0.259394629	0.052287725	0.159165313	0.279611772	0.174617409
COX6C	-0.041802281	0.08920733	-0.023831292	0.230634326	0.230746811	0.146144148	0.329326545	0.308860628	0.327589933	0.328151799	0.13476458	0.363262277	0.260344288	0.016217631	0.213956554	0.016384996	0.072462549	0.143358163	0.295274307	0.223754639	0.088355088	0.023747197	0.047515626	-0.016993655	-0.016360849	-0.108310316	0.068077272	0.01301028	0.066752873	0.254208447	0.062207876	0.297824141	0.299116499	0.353082257	0.156525414	-0.031111293	-0.020586824	0.183309916	0.183186762	0.13778008	0.093665867	0.20439689	0.082544321	0.147673032	0.239675934	0.093540269	0.144337205	0.222236232	0.232321604
ACAT1	-0.031302643	0.351723335	0.260056124	0.513212091	0.461381553	0.460984898	0.411169688	1	0.142670441	0.312067802	0.309250842	0.270444541	0.352652807	0.395965933	0.312988084	0.038597057	0.090226789	0.301862297	0.322489249	0.127349209	0.227392541	0.342408227	0.100084405	-0.010777503	0.021428531	0.147490005	-0.006357267	-0.028396018	0.141462846	0.283519551	0.103143773	0.290530127	0.062713394	0.435104774	0.057297798	0.145372472	-0.029240073	0.259509326	0.066059078	0.07233465	-0.009928341	0.15747587	0.456318104	0.09549026	0.41158871	0.464271362	-0.027911017	0.125917148	0.459731588
CYC1	-0.03097505	0.144860321	-0.047120446	0.327755697	0.300909952	0.173364448	0.233998238	0.320246296	0.498239721	0.298642304	0.10904992	0.482734822	0.228581652	0.001825234	0.202750379	0.0201771	0.022710917	0.110000348	0.269938633	0.244072689	0.206991968	-0.076939668	0.063067128	-0.006884281	-0.01150643	-0.15920473	0.084982495	0.0003383	0.069323346	0.368647995	0.066062631	0.42616038	0.312320229	0.341999967	0.122291062	-0.039635142	0.050461929	0.258712869	0.191783004	0.011277622	0.101336896	0.18981468	0.009026859	0.201456978	0.204352594	0.005562831	0.201601002	0.338270683	0.193084915
PPARG	-0.029189261	0.164059045	0.099830234	0.127067217	0.219939999	0.025910526	0.142224089	0.11673674	0.120367759	0.175751169	0.205774725	0.155427187	0.329972231	0.047722075	0.14470287	0.035445813	0.028859262	0.175588232	0.231271047	0.057912195	0.232273243	0.094494194	0.009531257	-0.029552077	0.052349661	0.106013108	0.038370748	0.03970262	0.095445891	0.230867923	0.240154327	0.183607399	0.071676542	0.097861059	0.039500967	0.013535025	-0.005682398	0.132874922	0.086376936	-0.043213134	0.126142561	0.020289788	0.056149802	0.012482228	0.012553978	0.133229274	-0.008715148	0.085198007	0.146598294
GAPDH	-0.025294618	-0.020563139	-0.099951511	0.124452766	0.011164942	-0.027210395	0.11090596	0.047320859	0.520339069	0.40594811	0.047870839	0.479756443	0.150377135	-0.17561335	0.053029385	-0.041747377	-0.014612908	0.017146174	0.29066097	0.211202891	0.161691306	-0.245224952	0.066918066	-0.024541865	-0.052064908	-0.238697541	0.096045025	-0.021687112	-0.036054337	0.297190484	0.089663023	0.231158331	0.344924251	0.345107419	0.149829591	-0.043161506	0.083400651	0.22465514	0.11620335	0.010290947	0.059088737	0.238444165	-0.14370536	0.223833402	0.113474689	-0.162383862	0.307161177	0.288951044	0.041924134
PPARGC1A	-0.023582718	0.185335919	0.124644221	0.30913757	0.221047955	0.105749116	0.235344032	0.294927772	0.0345192	0.113714502	0.1653849	0.257588545	0.093262854	0.099608616	0.151145375	0.004102844	-0.002117392	0.090802461	0.238898357	0.165022294	0.124993479	0.055707336	0.009564012	0.014203254	0.077837517	0.041107398	-0.038859914	0.11142071	0.129051809	0.070844986	-0.069789794	0.102307408	0.063644969	0.247268874	0.01207843	0.10158677	-0.046720352	0.059842057	0.095770365	0.084601137	0.042329801	0.079981568	0.156878507	-0.029670739	0.187848965	0.167339401	-0.010589825	0.065619749	0.150061488
NDUFV2	-0.022704971	0.282078321	0.051393163	0.401651955	0.392725437	0.2553339	0.453725248	0.414401372	0.182569938	0.222196148	0.235361132	0.20923089	0.283018132	0.247504079	0.269240946	0.015768206	0.054201209	0.106730347	0.341963178	0.220285218	0.208526088	0.19017734	0.044583252	-0.032845242	-0.004609232	-0.020235563	0.000560075	0.021267387	0.15422749	0.303844114	0.125850251	0.379827095	0.195272486	0.381178681	0.026923361	0.037803492	0.006167547	0.195067938	0.0918806	0.118271681	0.03528321	0.035065399	0.313935754	0.082923247	0.336829872	0.35694314	0.041651148	0.122990728	0.243027202
CYP4A27P	-0.021874822	0.036628588	0.136556795	0.107727828	0.098645192	0.15873594	0.096023563	0.195848625	-0.090784741	-0.054996144	0.011134094	0.015750292	0.074976728	0.146724535	0.094182868	-0.010480776	0.041146618	0.047164	0.085474189	0.064111192	-0.047629419	0.172395647	-0.013742415	0.025454785	0.042019497	0.17203537	-0.011870097	0.003332501	0.035547437	-0.025125562	0.001198523	-0.042861513	-0.049995283	0.002552164	-0.04164895	0.052075891	-0.052690874	-0.081783345	-0.018803341	0.01477441	-0.016309105	-0.079076854	0.147552154	-0.020169715	0.16971843	0.196687067	-0.043733713	-0.030735133	0.132057277
CPT1A	-0.021423315	0.143307743	0.078378129	0.203969006	0.073872224	0.151960493	0.199465507	0.234337973	0.338988275	0.420159093	0.124293618	0.453515836	0.297441962	-0.024448139	0.150022326	0.078211712	0.143375583	0.213735089	0.328160818	0.188950468	0.157574642	-0.054646905	0.046744275	-0.021484446	0.054229592	0.007272182	0.083555628	-0.005383493	0.07314665	0.287967351	0.147755988	0.200066962	0.293759953	0.331079287	0.156056782	0.074636446	0.048128883	0.222576253	0.163844445	0.073301213	0.084715595	0.282242061	0.055038512	0.1861979	0.188112227	-0.02301481	0.174086243	0.247687337	0.201072467
PPATP1	-0.021397093	0.08156336	-0.018707615	0.131200962	-0.057142887	0.011972894	-0.018668592	0.067715558	0.117171402	0.189608698	0.06935529	0.086787259	0.083284103	0.026069387	0.04182636	-0.015497897	0.151996915	0.109591953	0.099461089	0.067084675	0.107612921	-0.02218817	0.017071554	0.032218827	-0.02228601	-0.049323928	-0.0148137	-0.00580836	-0.034387344	0.083933482	0.126336614	0.04862774	0.001127146	0.135135585	0.011407017	-0.022992577	0.023763969	0.156294424	0.023439505	0.059548803	0.030015598	0.121204697	-0.042999529	-4.28E-05	0.01689633	-0.056020546	0.013285857	-0.006421586	0.020855946
ACO1	-0.019999127	0.246825815	0.096669563	0.335677673	0.293634954	0.23153006	0.213421192	0.309250842	0.074653312	0.301301083	1	0.214728512	0.386110452	0.326311277	0.322091946	-0.008809404	0.14774241	0.35437923	0.280754671	0.069876884	0.384318641	0.382852698	0.07742512	-0.022256741	0.004118368	0.103983306	0.009262837	0.027936865	0.113585633	0.210024724	0.233825285	0.235616755	0.063095486	0.398739047	-0.047868002	0.169942146	0.073481659	0.400132984	0.034508256	-0.003095896	-0.024773923	0.122794565	0.2572584	-0.076518543	0.111270105	0.260093482	-0.034566676	0.04374959	0.290572728
ACSL1	-0.018970123	0.278803383	0.281403573	0.277614983	0.211570675	0.242343564	0.205524729	0.301862297	0.11187022	0.292362526	0.35437923	0.309089722	0.399632535	0.236465591	0.352553616	0.060576144	0.236044377	1	0.255710352	0.083293023	0.283945624	0.21174007	0.042939739	0.003042581	0.01132924	0.187755442	0.055554037	-0.05062257	-0.011579868	0.285452694	0.246072429	0.319906742	0.151135801	0.24847632	0.082255942	0.174544777	0.06128721	0.21980571	0.115398101	0.061635379	0.011110559	0.137572425	0.227233919	0.059702846	0.171037007	0.151687221	0.048430217	0.142621	0.231533321
DLAT	-0.01889197	0.412701403	0.057655386	0.535008991	0.26294451	0.301255267	0.271842874	0.558315236	0.366116298	0.581003105	0.378840241	0.469365094	0.510534386	0.226798469	0.387541385	0.01867222	0.133947551	0.33328737	0.521805293	0.227248056	0.420706009	0.151506417	0.056340683	-0.044909161	-0.004201608	-0.001768202	0.03766298	-0.01943045	0.02931396	0.357357928	0.258529678	0.401718705	0.191809684	0.591902749	0.088068721	0.109595621	0.162196616	0.357056752	0.138512221	0.006688724	0.023560203	0.258811708	0.174256211	0.102478706	0.239539799	0.175508116	0.140735558	0.243951218	0.402354974
POR	-0.018830357	0.228682674	0.077289476	0.246977854	0.373851107	0.158679636	0.377918755	0.3169921	0.209404569	0.380087962	0.284573798	0.410970807	0.451173492	0.260901514	0.384577786	0.017357897	0.147569003	0.315711708	0.306003869	0.161004052	0.147478697	0.260383113	0.025267427	-0.001896059	0.029731927	0.046545671	0.173809808	-0.004729872	0.126634333	0.294592536	0.308573806	0.416056075	0.262697482	0.41835271	0.192895544	0.067296875	0.066850328	0.253240248	0.101497769	0.080169204	0.028022278	0.183163999	0.212138238	0.123301501	0.214983752	0.154118626	0.189584011	0.27850316	0.342740787
ATP4A	-0.018801512	-0.005248417	0.057796561	-0.032026037	-0.047489775	-0.025679827	-0.006507854	0.002023981	0.155511309	0.080243123	-0.045586757	0.0773178	-0.036496932	-0.116749018	-0.093362585	0.041449795	0.005691142	-0.042455621	-0.024154032	0.101825417	-0.068344465	-0.126026763	0.045328664	0.022784489	-0.007124775	0.033488752	-0.007988995	-0.014942951	-0.008678277	0.099627697	-0.047644933	-0.033531506	0.045300932	-0.004388329	0.074802639	-0.026450947	-0.057591616	0.044140125	-0.000371127	0.030661477	0.021130701	0.089207461	-0.109954686	0.056568574	0.059392848	-0.085256717	-0.001323639	0.00559826	0.027774101
ALDH18A1	-0.018453973	0.285332937	0.037314978	0.405279577	0.270013151	0.264431517	0.352618554	0.435104774	0.28718414	0.557894167	0.398739047	0.424983146	0.461626841	0.242084316	0.349988392	0.012507037	0.091660534	0.24847632	0.474925338	0.167724298	0.356992395	0.202318932	0.082690214	-0.023623869	-0.024336121	-0.055394922	0.052999643	0.007977248	0.086513731	0.336987598	0.181000789	0.38766606	0.298609604	1	0.062104835	0.141800445	0.082029164	0.42808701	0.143619261	0.069483976	0.054374033	0.353539556	0.242677942	0.027458811	0.28773795	0.212529431	0.116516774	0.201958938	0.404060978
PPAT	-0.017289067	0.150321187	-0.079997943	0.222833823	-0.004091727	0.085613305	0.074092668	0.191403671	0.45980027	0.542046843	0.159300111	0.362909388	0.275529263	-0.062844375	0.181480779	-0.023505861	0.136266933	0.162684174	0.315280213	0.302792912	0.204093383	-0.113624051	0.025966086	-0.027267021	-0.055090513	-0.163652755	0.01280744	-0.030538775	-0.02650646	0.289367662	0.147823066	0.191247701	0.222843448	0.370971178	0.079889813	0.011679465	0.06014932	0.318083658	0.048588331	0.022202987	0.048188588	0.288165345	-0.119811742	0.086747213	0.084954392	-0.13559819	0.173077009	0.17599814	0.127354821
ACSL5	-0.014827469	0.253317524	0.160064276	0.325141902	0.478111664	0.311134331	0.246172264	0.342408227	-0.231850498	0.016316305	0.382852698	-0.043820433	0.301283761	0.534173926	0.287450372	-0.013369829	0.081356788	0.21174007	0.125689402	-0.103647858	0.19338457	1	0.089373266	0.137252424	0.030694184	0.328266721	-0.043561065	0.011859579	0.260491945	0.059374943	0.184451398	0.173386982	-0.115408317	0.202318932	-0.096080009	0.092620872	-0.053024424	0.108250563	-0.062260127	0.009347449	-0.081591044	-0.104349464	0.453833819	-0.110428352	0.231145219	0.485623536	-0.211652214	-0.072732053	0.374909652
NDUFS8	-0.013441382	0.28221693	0.004339802	0.289598093	0.397063837	0.170936917	0.390812407	0.363257845	0.283434123	0.285617468	0.236208227	0.323736065	0.31139079	0.207120171	0.343746995	0.035902842	0.114161229	0.183740717	0.263745747	0.208368215	0.15603813	0.158837097	0.057506084	-0.030642766	-0.018263927	-0.071018288	0.055480813	0.007009598	0.079729279	0.329372139	0.131648178	0.460086556	0.277142289	0.387211862	0.063980153	0.042792451	0.027293947	0.225632022	0.145783228	0.065612947	0.114889553	0.092380868	0.230781487	0.058080123	0.185323599	0.258294047	0.170670183	0.2780258	0.2732052
MDH1P1	-0.013372839	-0.042054169	-0.017536179	4.28E-05	-0.036001238	0.038116089	-0.05124676	-0.006166536	0.039665147	0.014931785	-0.009334231	0.00233424	0.016497979	-0.060268146	-0.030623792	0.004656634	0.071710713	0.000826608	-0.032788156	0.046685452	-0.031611467	-0.051608349	0.012357919	0.103493013	0.025676178	0.019326369	0.011217098	-0.001913636	-0.019022565	-0.00614799	0.033366447	-0.022706878	-0.02867482	-0.018294373	0.028877166	0.039244449	0.012278823	-0.001260772	0.003069356	0.113147016	0.085058045	0.040218024	-0.038377348	-0.025547365	-0.05115395	-0.067683809	0.043380655	0.005814256	0.001313529
PPA1	-0.013345128	0.331469679	0.069641327	0.436533265	0.361520289	0.306421752	0.303079946	0.433121673	0.200907868	0.291583954	0.33264148	0.24572513	0.371144228	0.319992215	0.292291192	-0.005935972	0.058751854	0.211068952	0.324854734	0.094735363	0.381276728	0.317447716	0.050106603	-0.03883446	-0.024749306	0.054980693	-0.023397273	-0.03898082	0.019338062	0.357081741	0.269065447	0.458092657	0.204137843	0.568535977	0.024806177	0.06117858	0.151306984	0.335591368	0.070234529	-0.0186864	-0.014292223	0.163252232	0.282836496	0.040102684	0.245811019	0.256625669	0.06206047	0.143922431	0.361875986
MDH1P2	-0.013183443	0.08951997	-0.008274757	0.048872743	0.002661224	-0.028772336	-0.043834036	0.11179716	0.14315785	0.122432938	0.009472241	0.117681689	0.045578516	-0.057311413	0.023300601	0.055293194	0.064623674	0.05572318	0.069639591	0.066458547	0.166078844	-0.034726138	0.060245661	0.082321465	-4.80E-05	-0.048784398	0.013011831	0.020365453	0.032634127	0.049376705	-0.007257962	0.048052881	0.013094668	0.059282595	0.031949937	-0.001371891	-0.013771212	0.044021551	0.037676243	0.081450082	0.047674079	0.000329335	-0.030139834	0.003587088	-0.013798505	-0.028124647	0.00294415	0.026998257	-0.003931642
OXCT2	-0.013014465	0.095930914	0.023796745	0.18062778	0.113474003	0.147945728	0.187305706	0.13125416	-0.003356412	0.121485875	0.044924363	0.054272754	0.101004168	0.122442439	0.153456215	0.017999433	0.080152899	0.041244733	0.135094966	0.112468783	-0.009555553	0.088295201	-0.001324668	0.005251256	-0.005802287	0.051483911	-0.039094868	-0.030491647	-0.038426189	0.081198611	-0.012086355	0.091969449	0.040088933	0.125966193	0.067821571	0.005104384	0.121228958	0.032727097	0.005234073	0.104270806	0.030977481	0.029274047	0.07190744	-0.044852824	0.081638821	0.105853834	-0.034613819	0.030827171	0.154566533
ALDH1B1	-0.011686532	0.256861585	-0.029966576	0.255446131	0.139994755	0.105875915	0.100779351	0.259509326	0.238488214	0.425710521	0.400132984	0.272656919	0.246532731	0.16400461	0.16714656	-0.05000891	0.155297609	0.21980571	0.206228097	0.07970626	0.278100639	0.108250563	0.109333941	-0.024587107	0.012239112	-0.066298509	-0.032387002	0.004335697	0.06653407	0.291337219	0.186097974	0.313051182	0.155300165	0.42808701	0.086596408	0.137624413	0.144998363	1	0.087162218	-0.021028769	0.003342655	0.289071671	0.051201338	0.043442949	0.096704409	-0.032176814	0.017177453	0.086855683	0.144079444
ECI1	-0.011604823	0.266502726	0.04946688	0.377206881	0.468642009	0.205871015	0.366556799	0.347741835	0.294259707	0.227069005	0.176364748	0.360591551	0.321745375	0.201634215	0.258493621	0.06216536	0.084080939	0.201575344	0.287845253	0.202624673	0.202658291	0.151637862	0.089524157	-0.023207021	-0.000221815	-0.03079157	0.061394049	0.017127501	0.081221306	0.374386708	0.183492263	0.582556249	0.295704342	0.316047023	0.071892923	0.071080693	0.028824688	0.210056161	0.112820301	0.086528894	0.024987526	0.035067425	0.253939561	0.133642984	0.284653249	0.253414256	0.11379297	0.282027729	0.287185819
OXCT2P1	-0.009929451	0.139498255	0.096463355	0.14021466	0.190408599	0.173808507	0.210907249	0.14461544	-0.055691388	0.105463494	0.111487435	0.036020079	0.151314779	0.207735929	0.192915157	-0.012588289	0.11297733	0.126140622	0.089322091	0.060184986	-0.000970471	0.264420406	0.037673892	0.002380132	0.001844848	0.12404005	-0.007981979	-0.03274297	-0.021831339	0.044286407	0.112351637	0.090831056	0.025605468	0.129468705	-0.02568852	0.028629956	0.082796888	0.031902917	-0.035991848	0.013236077	-0.007073342	0.007403637	0.121767236	-0.063267266	0.097690509	0.124750098	-0.090125036	0.057435678	0.161115811
PDHX	-0.009274668	0.229358131	0.040450911	0.397409438	0.16189751	0.184894059	0.240911609	0.338951999	0.526297389	0.509303565	0.207404813	0.543712079	0.377105835	0.031984332	0.290303567	0.013941112	0.113217464	0.232501453	0.462201843	0.322895863	0.242676652	-0.071380516	0.070356761	-0.030144811	0.000513196	-0.112253011	0.235126895	0.020169955	0.050454017	0.373472677	0.147866793	0.367337426	0.321725376	0.496955243	0.286520013	0.100917634	0.061589139	0.327395172	0.156368073	0.065991152	0.121858687	0.278934884	0.086666155	0.238423833	0.308178535	-0.014762562	0.238125805	0.314260248	0.271617765
CYP4A43P	-0.009243916	0.033169223	0.084160026	0.091059384	0.085101451	0.102466418	0.052204927	0.138561452	-0.035669095	-0.009754402	-0.002050903	0.03301569	0.052559362	0.04165959	0.065131044	0.045428619	0.068730793	0.012906399	0.079483356	0.025494644	0.013625116	0.099467084	-0.006430312	0.009883662	0.02782092	0.085645747	0.036481247	-0.013736012	0.029951512	0.009708533	0.01879994	-0.023478976	-0.003301438	0.03347876	-0.020241543	0.001065663	-0.037157248	-0.072226259	-0.011286092	0.093118384	-0.017145938	0.043803148	0.103598662	-0.028018652	0.078700382	0.147111379	-0.004123281	-0.018371689	0.083620227
NDUFB8	-0.008090286	0.318208979	0.075785909	0.388446394	0.443402426	0.266990436	0.413351012	0.398435011	0.338478837	0.233162539	0.187393923	0.301578783	0.299929116	0.193928894	0.284983546	0.087391074	0.034934246	0.13274379	0.26333933	0.184959709	0.227445085	0.147190574	0.128067835	-0.028871946	-0.020884203	-0.011977094	0.071231702	0.011020055	0.112948869	0.372596686	0.109637545	0.430349943	0.283594335	0.457422377	0.083011086	0.029558344	0.10441155	0.226072652	0.131677788	0.046551579	0.087262044	0.100559477	0.265668926	0.124081241	0.278440842	0.234428944	0.156149071	0.256234805	0.270781586
ACSL6	-0.007751818	0.102062847	0.006141675	0.101650757	0.076880527	0.079504833	0.033164921	0.100084405	0.043620542	0.101763386	0.07742512	0.080712621	0.104442016	0.053486614	0.014706335	0.292623953	0.028559968	0.042939739	0.028017997	0.020081559	0.053715695	0.089373266	1	0.011473353	-0.017254754	0.045471396	-0.03364791	-0.023870881	-0.018812522	0.077957415	0.036749499	0.053010812	0.05379402	0.082690214	0.011658673	0.109830794	-0.022376418	0.109333941	0.012669956	-0.00793364	-0.016431809	0.061049748	0.06023238	-0.032568052	0.036056887	-0.004531879	-0.050246543	-0.004898518	0.044108883
ACOX2	-0.007702925	0.286246536	0.202500495	0.345444076	0.483413609	0.30926274	0.347604989	0.395965933	-0.173514718	0.084578369	0.326311277	-0.012449846	0.267594073	1	0.293437223	0.029613496	0.113036816	0.236465591	0.159359195	-0.069723214	0.24398358	0.534173926	0.053486614	0.078887844	0.046436485	0.294270809	-0.052956452	-0.018826974	0.10320894	0.111509633	0.171786223	0.212565354	-0.084890136	0.242084316	-0.115657149	0.134828571	-0.032199462	0.16400461	-0.076632313	0.015658527	-0.107965812	-0.049566407	0.487646799	-0.093087587	0.238309687	0.373214636	-0.140863773	-0.053066672	0.350651885
ALDH3A1	-0.0076442	-0.118772697	-0.013314234	0.018504226	0.045200445	0.043217827	0.115532123	0.09549026	0.209409386	0.123508887	-0.076518543	0.207672543	0.031846695	-0.093087587	-0.039873805	-0.011309592	-0.02174525	0.059702846	0.121865102	0.094146096	0.007107261	-0.110428352	-0.032568052	-0.013346137	-0.000243972	-0.068845364	0.071112694	0.033712388	0.026394079	0.08377023	0.032534983	0.065425847	0.147464287	0.027458811	0.10552251	-0.053129544	-0.038918992	0.043442949	0.114364849	0.02664372	0.025297979	0.104222178	0.021266846	1	0.427546923	0.036070441	0.111828369	0.160419969	0.060652389
NDUFC2	-0.006583209	0.302757247	0.044682092	0.337909018	0.275683821	0.231121673	0.255707383	0.323912845	0.294412566	0.205756467	0.193510727	0.206783361	0.284771136	0.139953538	0.215231388	0.115728522	0.076959225	0.158502773	0.211793918	0.22914682	0.188898474	0.112714294	0.114849772	-0.020691386	-0.015901221	-0.021321296	0.030858614	-0.00474435	0.054471233	0.302346692	0.159101456	0.407898248	0.154769188	0.300189459	0.101661365	0.064649923	0.073090718	0.216345918	0.080579699	0.04583016	0.076611812	0.078121516	0.179023219	0.038752384	0.181084168	0.11505651	0.110010224	0.171609539	0.204496683
CYP4A44P	-0.006364012	0.030642195	0.233047628	0.108803217	0.126145562	0.154024367	0.091403348	0.124238239	-0.066570553	-0.034955514	0.034956375	0.098560182	0.089023633	0.134026076	0.090700102	-0.010077105	0.044291168	0.048935055	0.158894916	0.055405534	-0.002035883	0.199479665	-0.005149425	0.040839212	0.067792197	0.257429136	-0.013760142	-0.012215158	-0.00205005	-0.009577452	0.012175856	-0.008480152	-0.041989922	-0.003734089	-0.02712229	0.019776555	-0.022511906	-0.064734795	-0.011248686	0.06590394	0.011874476	-0.072619065	0.185770831	-0.004469281	0.185158385	0.280116211	-0.048996878	-0.005624595	0.209325397
NDUFB10	-0.006195364	0.315420701	0.067564741	0.396913189	0.418821545	0.242647127	0.387888311	0.392431033	0.355611665	0.330780307	0.246903272	0.405701277	0.385986159	0.232574296	0.373451643	0.084757293	0.105830636	0.278599934	0.331001882	0.203963829	0.259165925	0.117163253	0.08360974	-0.030562188	-0.00637488	-0.019593222	0.08532107	-0.007757396	0.079446508	0.405240816	0.222387254	0.582063443	0.351471524	0.405404261	0.089887685	0.096256875	0.062275955	0.297061915	0.129867245	0.153936135	0.071798792	0.093435189	0.298109542	0.119287338	0.252672206	0.207938123	0.169605248	0.306951037	0.320579629
NDUFA9	-0.004705401	0.208435698	-0.045562326	0.309217914	0.178632513	0.084351914	0.18987973	0.192392304	0.509210813	0.323595192	0.098020884	0.444447503	0.206725039	-0.094615751	0.131782279	0.042891388	0.03873635	0.079146473	0.284103258	0.250675946	0.229335595	-0.141155299	0.11388431	-0.021840572	-0.037308469	-0.154345423	0.070000954	0.004589766	0.026892205	0.389522213	0.0575629	0.400057488	0.359408155	0.374060327	0.158955172	0.023927712	0.072366431	0.286007276	0.17831141	0.081015144	0.133132082	0.22571076	-0.004665823	0.173396514	0.13671877	-0.04485292	0.226830701	0.250686559	0.111697532
PFKP	-0.004590894	0.185582907	-0.061891475	0.2525163	0.205905096	5.61E-05	0.257915184	0.19724254	0.195820059	0.384156519	0.275959704	0.34465151	0.232876898	0.112378997	0.200386632	-0.044203005	0.12313146	0.178399202	0.31646777	0.131375405	0.256700648	0.043141065	-0.000382317	-0.021949217	-0.006507101	-0.144210861	0.003658088	0.088942326	0.076910842	0.222204609	0.101272311	0.229773627	0.193775187	0.400064951	-0.0046854	0.032869138	0.09369086	0.297426191	0.094652922	0.011450917	-0.007082092	0.245000254	0.011057487	0.037638418	0.054058576	0.101012037	0.147515209	0.122756214	0.0867467
ACLY	-0.003258226	0.254182638	-0.016164252	0.354942116	0.112328209	0.141631117	0.210598952	0.312067802	0.465715457	1	0.301301083	0.501039879	0.473715422	0.084578369	0.25794352	0.001604818	0.168923838	0.292362526	0.505415247	0.239528742	0.283850558	0.016316305	0.101763386	-0.017241151	-0.030062058	-0.07734892	0.029093504	-0.028922066	-0.017179734	0.336178556	0.223260421	0.27384794	0.301940943	0.557894167	0.116510393	0.082062809	0.10789938	0.425710521	0.09294409	0.040742035	0.010659732	0.354537785	0.028427811	0.123508887	0.218643531	0.00292656	0.192304534	0.229837311	0.277820855
PPATP2	-0.003152297	-0.036388184	-0.011829112	-0.034684129	-0.02235422	-0.027862376	-0.040684993	-0.033026492	-0.018396395	-0.020814692	-0.030362767	-0.021453164	-0.039415211	-0.023575827	-0.030036408	0.011410707	0.108710723	-0.029240617	-0.013611692	0.000307168	-0.031895233	-0.026147538	0.017195639	0.164056896	0.034945213	-0.015240271	-0.006208622	0.005781667	-0.000497421	-0.031530614	-0.015104162	-0.035010332	-0.011071496	-0.033959347	-0.002753535	-0.008055106	-0.016546017	-0.025222956	-0.011217414	0.161127471	0.034025873	-0.016680453	-0.030116431	-0.010881579	-0.014144649	-0.022895707	-0.002927496	0.001766757	-0.030071722
ALDH7A1	-0.002893031	0.374319335	0.112201771	0.415236087	0.278145796	0.328062723	0.3076434	0.388202003	0.149094189	0.285533913	0.233917823	0.245014404	0.359903609	0.319966043	0.356642795	0.057417111	0.085003064	0.249082209	0.309740583	0.054055365	0.245370275	0.246818464	0.021202695	-0.013349576	0.017873262	0.123279863	0.026197364	-0.010444215	0.068812243	0.147080495	0.104233403	0.289318179	0.139201731	0.329252183	0.008481924	0.078801479	0.110778615	0.171459642	0.036555442	0.026334099	0.011016012	0.078804649	0.39834954	-0.00156038	0.239400658	0.263594999	0.049884817	0.245698447	0.285575607
NDUFS4	-0.002833262	0.270710569	0.029544776	0.418950317	0.336160651	0.232501255	0.304577003	0.316100563	0.320193428	0.31397142	0.214491056	0.354744338	0.355457824	0.17715905	0.264053729	0.063658891	0.058454803	0.183284004	0.292922327	0.188549532	0.256685672	0.11295385	0.124667701	-0.027036267	-0.005615654	0.005290001	0.021544048	-0.025439184	0.043671254	0.363449372	0.200907858	0.437160407	0.266331826	0.340549084	0.041843618	0.032122491	0.071099595	0.256679546	0.087079477	0.056147553	0.040387649	0.110859761	0.124382021	0.125166961	0.251115162	0.131498313	0.115530353	0.199501098	0.270455274
COX5B	-0.002519349	0.193207424	-0.014368263	0.250528246	0.277426713	0.135427649	0.204351691	0.199224375	0.424718411	0.231196602	0.107967842	0.368010826	0.235835219	-0.028433488	0.177100535	0.020850094	0.004955057	0.097680145	0.214564585	0.24983296	0.141971846	-0.05002853	0.060189458	-0.013934366	-0.036685649	-0.126979032	0.062416057	0.013866717	0.034457658	0.364754397	0.098469344	0.411852369	0.303862388	0.28946356	0.160860472	0.002806367	0.01099917	0.219768938	0.147143944	0.063015623	0.10238082	0.098936348	0.040792587	0.170174676	0.193354873	0.008243265	0.232710226	0.236365743	0.142342455
ACSL6.AS1	-0.001726941	0.025650819	-0.016791001	-0.007721055	0.004294556	0.002448353	-0.01904229	-0.010777503	-0.022001302	-0.017241151	-0.022256741	-0.03276847	-0.027378782	0.078887844	0.037944045	0.005341679	-0.002086269	0.003042581	-0.029707155	-0.023318932	-0.034931298	0.137252424	0.011473353	1	0.005997915	0.001439864	-0.005992586	-0.001914003	0.006392045	-0.028864617	-0.039815729	-0.039833269	-0.031942532	-0.023623869	-0.011161579	0.123245935	-0.021654798	-0.024587107	0.005520003	0.064795936	0.002809121	-0.015490319	0.010520967	-0.013346137	0.115019418	-0.007362229	-0.019962586	-0.022127234	-0.027174833
AHR	-0.000759393	0.118628123	0.020568144	0.187764727	0.142141211	0.067198687	0.098552684	0.103143773	0.042527634	0.223260421	0.233825285	0.150583876	0.344904083	0.171786223	0.138000014	0.014667325	0.053033045	0.246072429	0.191208888	0.024083831	0.188772865	0.184451398	0.036749499	-0.039815729	-0.005669858	0.080041319	-0.046385481	-0.038717764	-0.009007215	0.200202802	1	0.269829523	0.073936686	0.181000789	-0.00461826	0.021391484	0.237734438	0.186097974	0.031736583	-0.007367013	0.001988757	0.07364889	0.068253932	0.032534983	0.057237053	0.045928746	0.032479527	0.132306143	0.163512933
ALDH1L1.AS1	-0.000527513	-0.003174904	0.052931537	0.083004645	0.154595825	0.079600103	0.220841394	0.07233465	-0.013739349	0.040742035	-0.003095896	0.123682866	0.025647035	0.015658527	0.080443855	0.157212962	0.163450149	0.061635379	0.031334284	0.047649206	-0.025602263	0.009347449	-0.00793364	0.064795936	0.036543604	0.029298063	-0.014780631	-0.022445286	0.144431654	0.121162009	-0.007367013	0.092782334	0.1953096	0.069483976	0.017202921	0.029540902	-0.0237708	-0.021028769	0.292683692	1	0.211286866	0.060854562	0.079910506	0.02664372	0.064334971	0.048591899	0.033406929	0.082447784	0.110682301
ACADVL	0.000403945	0.229079546	0.19960049	0.333521269	0.512521656	0.312282111	1	0.411169688	0.071306114	0.210598952	0.213421192	0.290935918	0.291510716	0.347604989	0.404929754	0.092831912	0.128521798	0.205524729	0.272994222	0.150216182	0.147550889	0.246172264	0.033164921	-0.01904229	0.083002405	0.148077785	0.005220852	0.112911376	0.170216972	0.295951222	0.098552684	0.325172077	0.365428529	0.352618554	0.001428414	0.027244729	0.015784625	0.100779351	0.116003261	0.220841394	0.039384794	0.073945088	0.468907633	0.115532123	0.44228381	0.391458699	0.018196835	0.230519533	0.403614919
NDUFB11	0.000498336	0.306356008	0.021444114	0.340330292	0.372624092	0.220834425	0.374171998	0.393327273	0.348183466	0.29342289	0.200439398	0.335413844	0.356160027	0.136695395	0.299988277	0.032335342	0.068428125	0.20321182	0.251888741	0.223606659	0.192102503	0.108944582	0.096408743	-0.015018899	-0.008538321	-0.061624305	0.027894119	-0.000206604	0.057896828	0.34607398	0.071682691	0.479914055	0.280427319	0.411833469	0.107295202	0.066646255	-0.011878949	0.234575329	0.108504709	0.067362751	0.075908144	0.077294981	0.211323525	0.055715186	0.201192083	0.149833218	0.118232041	0.2279328	0.247115169
ALDH1A2	0.002306854	0.156056926	0.076929574	0.118422788	0.047048022	0.025639535	0.027244729	0.145372472	-0.015246615	0.082062809	0.169942146	0.019165617	0.093513049	0.134828571	0.144621335	-0.009944393	0.010462263	0.174544777	0.169476778	0.025133787	0.057155615	0.092620872	0.109830794	0.123245935	0.021144029	0.154365176	0.115649908	-0.011955359	0.021580164	0.062820169	0.021391484	0.078633156	-0.02004782	0.141800445	0.028481651	1	0.044124488	0.137624413	0.024596131	0.029540902	-0.000445391	0.075308773	0.082337062	-0.053129544	0.037882172	0.058552008	0.02551709	-0.032614866	0.001534748
SDHA	0.002397186	0.166831885	0.014504104	0.351657649	0.263606758	0.160748311	0.319388435	0.259108983	0.327944793	0.444422718	0.288115439	0.476123585	0.342155517	0.028971541	0.385018809	0.006012335	0.109226479	0.221403665	0.374216836	0.163306887	0.194618402	0.05059239	0.01158487	-0.036582274	-0.01746218	-0.049335002	0.120112912	-0.0131788	0.06178652	0.266767648	0.205939305	0.349406826	0.321206099	0.427875296	0.126407387	0.073466411	0.165522764	0.240264209	0.1892059	0.121839742	0.099145998	0.196032622	0.079449312	0.093945749	0.177351662	0.066593114	0.191176728	0.37640679	0.260972348
ALDH3B1	0.002625906	0.159890543	0.281781943	0.311123421	0.449376387	0.298262503	0.391458699	0.464271362	-0.17630203	0.00292656	0.260093482	0.045403455	0.259737806	0.373214636	0.30012668	0.032706712	0.021095993	0.151687221	0.319193535	-0.029255006	0.115957342	0.485623536	-0.004531879	-0.007362229	0.030046823	0.301577961	-0.018901934	0.049728818	0.157972929	0.080538295	0.045928746	0.125113505	-0.039909238	0.212529431	-0.089706371	0.058552008	-0.096103331	-0.032176814	-0.044329989	0.048591899	-0.070429948	-0.092844167	0.563672994	0.036070441	0.352343586	1	-0.145198157	-0.058232759	0.416259895
NDUFB6	0.002705781	0.234265098	0.03650772	0.333972711	0.215021517	0.1819783	0.120141225	0.240591929	0.475515767	0.258524404	0.447927738	0.357801631	0.210971476	0.035561035	0.187649518	0.071352879	0.08279214	0.160530975	0.192705348	0.241721452	0.224097824	-0.017723717	0.118132992	-0.0202973	-0.00327561	-0.065573865	0.108539894	-0.001909569	0.054674105	0.345238908	0.127074417	0.40459901	0.214372212	0.28809982	0.136002015	0.033843395	0.065960357	0.387303367	0.125113358	0.048896236	0.06218543	0.157693836	0.028258753	0.065971139	0.143207825	-0.031978067	0.158110674	0.232696665	0.132359662
NDUFB2	0.003308602	0.313910225	0.032480303	0.37435227	0.455456866	0.1836917	0.35806362	0.358842373	0.32635163	0.325071374	0.226299369	0.353647455	0.341144758	0.20448436	0.280529511	0.053844136	0.067864206	0.225178919	0.263961338	0.179597946	0.202524621	0.127206226	0.140074791	-0.031796462	-0.0060932	-0.022363047	0.025025327	-0.024617414	0.033032136	0.424863309	0.210673029	0.54487403	0.282365176	0.351976918	0.119961163	0.057086537	0.048437704	0.310401851	0.09663802	0.077623881	0.02334142	0.153567826	0.182601025	0.132873212	0.250989615	0.122931283	0.114692778	0.240591304	0.273835327
NDUFC1	0.003883602	0.326623649	0.096413121	0.385534134	0.433014915	0.229892659	0.397845452	0.378938589	0.318191919	0.284557528	0.24119492	0.416345874	0.380907037	0.242129464	0.399962315	0.089465616	0.107399162	0.319085373	0.316296572	0.192677699	0.225089359	0.141888908	0.056731253	-0.038095572	0.00071137	-0.001813013	0.106058751	0.016072613	0.101576525	0.381079886	0.165257668	0.475996856	0.276172402	0.393440964	0.076867297	0.025966595	0.073102025	0.247936815	0.140362816	0.093751602	0.09204095	0.075012101	0.272979925	0.072781093	0.237613098	0.224157752	0.137796629	0.266900175	0.307791681
NDUFV1	0.004096602	0.21304296	0.059875211	0.329681822	0.353883122	0.244828718	0.492827128	0.392270181	0.366256062	0.430537217	0.227057944	0.512549849	0.338015138	0.131015505	0.411028146	0.083410933	0.195625499	0.237520074	0.339747006	0.239243538	0.182569127	0.08996007	0.014535506	-0.039001556	0.036190858	-0.032100237	0.094673256	-0.003215284	0.098766933	0.361854617	0.08989417	0.414207558	0.422722202	0.437971173	0.09733285	0.056506955	0.072270549	0.229897346	0.223364598	0.192775782	0.158348172	0.209089162	0.19917698	0.103945263	0.199024268	0.162152537	0.292871788	0.402144229	0.326029841
NDUFA4	0.004598512	0.36130513	0.033920681	0.444103273	0.423330578	0.239380611	0.26799412	0.344468554	0.258196422	0.207808184	0.212940907	0.248479049	0.354078122	0.225150612	0.20561073	0.004840618	0.03502635	0.180394944	0.229285935	0.157408904	0.269400065	0.220175872	0.088979998	-0.021985343	-0.014973057	0.028748624	-0.024957739	0.005606587	0.071665375	0.381339087	0.305671249	0.513706978	0.162393933	0.292773105	0.047881344	0.043201068	0.060183734	0.259851456	0.068502373	0.037398354	0.021545167	0.058201463	0.195310757	0.068556752	0.241359272	0.203627348	0.041439466	0.126710526	0.255559928
PFKFB4	0.004655421	0.097428686	-0.031772914	0.117095259	-0.004974681	-0.013288914	0.116839037	0.066674761	0.249802771	0.318729796	0.101170172	0.166964787	0.165311427	-0.003040216	0.113876189	-0.011676576	0.090208619	0.084299182	0.169658831	0.139601661	0.147863578	-0.087766095	0.004238268	-0.011954282	-0.006425984	-0.115293253	0.056671961	-0.012797722	-0.007768422	0.20102475	0.071184897	0.155751258	0.136289758	0.173336835	0.019002999	0.014096651	0.052537813	0.126500258	0.014870118	0.017717687	-0.010363609	0.11852895	-0.11197488	0.020583272	0.00682595	-0.137219671	0.108793039	0.180674198	0.001019537
NDUFA1	0.005482454	0.241990357	0.038863065	0.332822029	0.323950459	0.221401026	0.329772078	0.310156936	0.402004244	0.268432301	0.167152146	0.436596255	0.256590123	0.086712227	0.215936678	0.022825445	0.076579527	0.217101173	0.247937574	0.216080877	0.260555575	0.020740942	0.076998726	-0.031710015	-0.004812849	-0.056739591	0.079720355	0.004757983	0.067930801	0.411843184	0.114158677	0.516434758	0.298946408	0.332318731	0.149615538	0.038808859	0.040100749	0.228064231	0.194475226	0.093267788	0.15083721	0.121125129	0.11955307	0.183461425	0.235056387	0.050047139	0.187222488	0.229881137	0.234396097
MDH2	0.005946497	0.200602378	-0.010343906	0.386733154	0.303004918	0.208705019	0.330604069	0.390263407	0.53855377	0.572019675	0.231428491	0.615581293	0.34068895	0.071486155	0.28762001	0.024147699	0.123670919	0.195277169	0.422082149	0.253456403	0.218570678	-0.017882862	0.064366978	-0.018162845	-0.010780765	-0.140213543	0.113877185	-0.021404112	0.05468012	0.400224109	0.208003619	0.436519514	0.390221766	0.517350961	0.170788856	0.001093048	0.096022145	0.383769162	0.186236983	0.072286295	0.088749158	0.302129461	0.075770343	0.253764473	0.284124207	0.046578294	0.278551351	0.385447748	0.300757152
ALDH8A1	0.006282827	0.011600646	0.035139749	-0.034045411	-0.046339661	0.007396491	0.003388494	0.017117345	0.054672983	0.082834017	-0.014776441	0.064534727	0.003871595	-0.063149478	-0.037298127	0.076575505	0.086911383	-0.014949204	0.040335972	0.043477955	-0.020882963	-0.067969	0.029332607	0.008519959	0.004265924	-0.033169198	-0.00835939	-0.009975453	-0.009961767	0.07388747	-0.024924115	-0.027571913	0.049540645	0.044302605	0.038847164	-0.013838076	-0.033821211	0.013119477	0.02634426	0.089253309	0.047407368	0.175149713	-0.056559935	0.002524003	-0.020141238	-0.059261633	0.053379616	-0.00713927	0.011915816
CPT1C	0.006363049	0.173436455	-0.048697609	0.168391423	-0.046957976	0.091888867	0.052678119	0.077287054	0.147414832	0.268054926	0.037349967	0.159220342	0.118007529	-0.056105157	0.092983141	0.072214052	0.045728993	0.061972896	0.102889887	0.107817097	0.050410087	-0.082423505	0.135573541	-0.004551002	-0.028828819	-0.060548404	0.014118788	-0.023943689	-0.039308315	0.110016427	-0.044629732	0.067139755	0.207197667	0.184961478	0.019386265	0.027168719	0.03140432	0.111981378	-0.016177407	0.043756598	0.010030332	0.117704868	0.008844488	0.020093677	0.027579747	-0.09415627	0.021757901	0.103786411	-0.007141619
PC	0.006601934	0.005315913	-0.042663244	0.175687607	0.198301171	0.118457951	0.282735947	0.186752576	0.258064628	0.246352433	0.197339381	0.396224074	0.241444468	0.100039711	0.22482253	-0.042193401	0.063006506	0.205098023	0.20361132	0.101951097	0.127528791	0.088211652	-0.006259261	-0.026657332	0.003355829	-0.042023828	0.015721827	-0.009777232	0.00465044	0.170599003	0.110630307	0.206789719	0.220307085	0.225978707	-0.009958724	-0.028611661	-1.34E-05	0.101365401	0.073501886	0.026864686	-0.013481256	0.121405698	0.156574903	0.318850875	0.30452107	0.126941937	0.267692061	0.315682223	0.236875052
GAPDHS	0.006827138	0.033859691	-2.91E-05	0.037243975	0.017882281	0.022565679	0.07240443	0.003019608	0.065856096	0.110999393	-0.005353148	0.066145906	0.071406943	-0.006523047	-0.046552223	0.015034453	0.140864778	0.05156447	0.030059952	0.076768359	0.002627687	-0.036991354	0.031390785	-0.003320557	0.005606725	-0.019404652	0.020258433	-0.009801395	-0.005775388	0.115730323	0.038338997	0.028460747	0.075816653	0.06237536	0.026442157	0.056939533	-0.017561292	0.042073944	0.04068893	0.14048784	0.060922479	0.0906907	-0.043056622	0.031452412	0.048531992	-0.035198709	0.056518339	0.027206674	0.061471801
NDUFA5	0.007113523	0.33636662	0.122280289	0.53337291	0.362791993	0.276761132	0.357036291	0.441840554	0.271962692	0.377309972	0.307880679	0.330479924	0.445639328	0.31377116	0.348558798	0.131939495	0.12890792	0.281716466	0.382973526	0.19251122	0.295754357	0.225270939	0.156985022	-0.032047096	0.001772093	0.067468844	0.035148731	-0.030680077	0.038894719	0.381660893	0.252880335	0.480511754	0.169981566	0.461888695	0.09938015	0.091493095	0.04066143	0.302167886	0.064884887	0.08633853	0.041514611	0.205929152	0.291865216	0.063708767	0.30992384	0.229758239	0.055616394	0.223927821	0.383450516
NDUFA3	0.00756738	0.299321646	0.074423661	0.340092614	0.394805375	0.160162326	0.419239869	0.279896148	0.197609444	0.241724788	0.237050065	0.260639079	0.357878574	0.234808604	0.346976383	0.050250447	0.0692607	0.174511954	0.295998764	0.200213871	0.193961232	0.156422738	0.081889366	-0.027728211	-0.01481453	0.006426666	0.085155049	0.038436008	0.116187244	0.305179505	0.123285643	0.493960222	0.385342843	0.3168801	0.073198048	0.052534861	0.032098654	0.228594939	0.109817371	0.062568923	0.047789741	0.01759426	0.261267227	0.001204384	0.228440902	0.211513767	0.06842836	0.213949654	0.223917017
PDHB	0.007797807	0.435102893	0.156714641	0.602071149	0.513698633	0.369739022	0.502690363	0.582582506	0.275391343	0.480847447	0.392936278	0.366671729	0.522353727	0.551507633	0.433076181	0.136123722	0.104069583	0.294575498	0.500969351	0.178252015	0.405034649	0.332276147	0.1589487	-0.02877815	0.029425905	0.14985247	-0.015574325	0.004843113	0.103587894	0.376298972	0.209548387	0.47795816	0.222365012	0.579504135	0.018965442	0.11465498	0.031310199	0.363402692	0.098569303	0.073932278	0.036096565	0.147809808	0.434210362	0.072873528	0.419563946	0.388346842	0.072617817	0.232139445	0.479213558
ECI2	0.00837312	0.288524458	0.246753116	0.460754547	0.395852122	0.301761804	0.367937445	0.501404435	0.276289214	0.321144724	0.231957202	0.383748368	0.367730225	0.235484899	0.280101208	0.093425325	0.098140546	0.25398734	0.352795265	0.123011781	0.216807751	0.221183993	0.095924914	-0.003874029	0.034757638	0.152983654	0.069247082	0.00893716	0.148094874	0.342549314	0.090627817	0.361510808	0.145283703	0.34144632	0.093246407	0.079241541	-0.021262595	0.218039721	0.02093115	0.095532043	0.011006339	0.085516383	0.305257545	0.10580257	0.378402469	0.333941903	0.008446867	0.201899474	0.41001424
NDUFAB1	0.008386087	0.308788132	-0.011304914	0.398890615	0.301710575	0.205879965	0.263245633	0.357857335	0.485544684	0.328218903	0.200579442	0.443326754	0.32217108	0.070473413	0.276771453	0.044945309	0.072395826	0.207951947	0.330846028	0.270842565	0.264583582	-0.002497525	0.063386068	-0.023004601	-0.012067585	-0.103894099	0.090206171	-0.015654355	0.04378117	0.458207903	0.185281696	0.539494009	0.354188994	0.393668599	0.117422027	0.045642957	0.101186454	0.329680755	0.167260218	0.12181536	0.093853537	0.165346056	0.10121753	0.144012619	0.213981714	0.071930165	0.203280654	0.299793595	0.253816616
COX7B	0.009174297	0.186576944	-0.013411791	0.274355973	0.244543236	0.156422617	0.203228856	0.230921496	0.469067396	0.171623404	0.064062855	0.3698308	0.196081121	-0.032878642	0.115789891	0.011061345	0.029056704	0.089447638	0.178310592	0.258078802	0.213640651	-0.087517017	0.048936334	-0.033836956	0.009792147	-0.097674849	0.083697361	0.012594022	0.074623546	0.378049972	0.112585859	0.458239859	0.264111956	0.248936617	0.151747317	0.003482713	0.062715453	0.205912781	0.181583093	0.07316288	0.105830319	0.132159064	0.032962818	0.186813755	0.178167405	-0.049703532	0.200834313	0.227079279	0.123857857
CYP4A26P	0.010525937	0.066559838	0.228436217	0.129837535	0.214039866	0.206647859	0.213499247	0.252666036	-0.117584054	-0.06475172	0.054903261	0.054100346	0.089707082	0.230435748	0.196845718	0.019068627	0.034761018	0.053761163	0.103474779	0.008307981	-0.032626247	0.276192253	-0.005226928	-0.002049983	0.062196762	0.228623585	-0.002575603	-0.022336952	0.091666794	-0.023206772	-0.019739078	-0.003299363	-0.029429868	0.026150536	-0.05172582	0.109486022	-0.055879421	-0.092537668	0.01539822	0.115684831	-0.00591154	-0.101878814	0.313128608	-0.033753053	0.233029345	0.297914678	-0.060362717	-0.008114004	0.220308636
IDH3G	0.010908083	0.368327538	0.060129073	0.387602753	0.341060783	0.208075238	0.470075064	0.360083052	0.308831887	0.405214415	0.312658492	0.420116629	0.33750475	0.235369647	0.443625734	0.044345383	0.180190227	0.304627071	0.314563599	0.162555957	0.286482511	0.169029342	0.06858139	-0.028217312	-0.00731813	0.003269366	0.034644387	-0.004394804	0.040187072	0.353364345	0.155412422	0.503351265	0.34864513	0.471329218	0.047590752	0.08270491	0.131881913	0.303460067	0.117520066	0.110533234	0.066863331	0.141332647	0.276238405	0.021003229	0.193448712	0.181363355	0.125482997	0.284860765	0.287645087
NDUFS7	0.011679171	0.224135738	0.068556467	0.253465457	0.370180117	0.175965181	0.344484987	0.233193282	0.415846636	0.383658253	0.259791671	0.547178525	0.288890291	0.106969223	0.324123693	0.123484373	0.15079543	0.281620887	0.227079514	0.174800694	0.197676428	0.005422755	0.11510063	-0.028958265	0.003575245	-0.01007867	0.056232531	-0.038644517	0.042043327	0.428218859	0.153556154	0.536397369	0.541446395	0.365301021	0.100564327	0.030487585	0.076354789	0.318260317	0.177095798	0.128903573	0.104893568	0.197411055	0.112393948	0.086253472	0.141738183	-0.008114513	0.285319716	0.393734469	0.25220718
CS	0.012455981	0.240110959	0.048609712	0.370914125	0.265881501	0.228551312	0.336112813	0.364302857	0.434749642	0.637075972	0.323409809	0.610228122	0.462644192	0.096513573	0.314900051	0.069116227	0.170980684	0.297313738	0.455208015	0.195816518	0.346903782	0.064447683	0.097737786	-0.009355939	-0.003221696	-0.067985242	0.046242873	-0.01457188	0.040237514	0.446179566	0.174329647	0.402655262	0.441430487	0.614054941	0.149619635	0.065410796	0.106501411	0.417174828	0.227377449	0.101856542	0.11285781	0.411138806	0.10645363	0.139414147	0.2414775	0.016592594	0.235958812	0.335188714	0.404095638
NDUFA2	0.012727661	0.35007307	0.124274742	0.437433306	0.486384554	0.31875912	0.344311749	0.413358158	0.202092826	0.112963345	0.215139122	0.193847931	0.283698457	0.313983947	0.282215868	0.069932006	0.037343283	0.17780186	0.182769306	0.125135285	0.210964657	0.276668514	0.132062415	-0.018244473	-0.016391925	0.079673719	0.014411044	-0.013337871	0.054558507	0.337076921	0.169725638	0.523782468	0.171244451	0.246396731	0.021936434	0.057901635	0.012869446	0.174830203	0.054005764	0.075682146	0.012568344	-0.057296406	0.344526217	0.035319058	0.279304772	0.292060061	0.032729378	0.143456988	0.291120002
ALDH7A1P2	0.012851344	-0.007449391	0.014571296	0.017139802	-0.003860696	-0.026032148	-0.00965492	-0.0172202	-0.039202493	-0.011314684	-0.021657736	-0.02136919	-0.033930325	-0.036797068	-0.030661543	0.007391606	0.143604324	-0.005914826	-0.015342923	0.037558786	-0.025033698	-0.043290815	-0.003428193	0.122060726	0.037639392	-0.000972869	-0.01554696	-0.004691915	0.039691836	0.064510352	-0.01947222	-0.045699121	-0.01632443	-0.041782609	-0.019646762	-0.008122563	-0.019399054	-0.027832466	-0.000920914	0.160871847	0.013711167	-0.009195902	-0.030464935	-0.003409305	-0.038044719	-0.054741543	-0.009864208	2.25E-05	-0.008485291
NDUFA12	0.012956669	0.301775882	-0.045890297	0.420894503	0.363816704	0.16881319	0.282067874	0.320540665	0.48985696	0.416195429	0.263617108	0.473449338	0.40242719	0.086435684	0.233925088	0.055934394	0.123638305	0.218632616	0.345776374	0.257903156	0.266395471	0.043893044	0.083041288	-0.03621919	-0.023214635	-0.113253177	0.054823194	-0.000587499	0.053861852	0.494190688	0.193769167	0.521196902	0.331070792	0.416995255	0.154671571	0.006239132	0.11244591	0.37401604	0.171019556	0.093930958	0.109489743	0.243385952	0.098522804	0.146261919	0.211263107	0.048443169	0.210472982	0.288347911	0.24405778
LHPP	0.013797649	0.265229997	0.094222406	0.336361317	0.46716317	0.269540719	0.385668642	0.334804909	0.142619591	0.161405924	0.22824878	0.25226887	0.328997181	0.242197381	0.406951418	0.130344748	0.043730589	0.186182375	0.277765783	0.082103023	0.203228824	0.321617928	0.10230592	-0.01712298	0.004854232	0.090857162	0.18058548	0.042164831	0.195100362	0.21223111	0.124570438	0.432505775	0.216286864	0.407094645	0.032701008	0.077378625	0.076451781	0.14135039	0.081905247	0.077417161	0.055682906	0.031042688	0.374029299	0.044964369	0.270605454	0.385607128	0.11153867	0.305968575	0.32485329
NDUFS5	0.013942834	0.31613845	-0.018874881	0.348665076	0.220470941	0.176574958	0.261277938	0.234702679	0.376368034	0.240941212	0.135694843	0.278818707	0.271409862	0.102291071	0.281261311	0.027704646	0.084306221	0.119112717	0.26006142	0.22136732	0.192461953	0.024180552	-0.017662536	-0.035545691	-0.002048428	-0.07164441	0.018099376	0.009747042	0.028967043	0.283903181	0.092265691	0.517730222	0.274046519	0.272974274	0.091976797	-0.00203003	0.094160276	0.20392189	0.084052517	0.10462102	0.088218612	0.048071957	0.137052723	0.031892854	0.124435734	0.060821497	0.181520407	0.261824178	0.19907146
NDUFB1	0.014093671	0.29779948	0.122699035	0.401878299	0.389751084	0.228808838	0.298181675	0.351128931	0.335321235	0.144100958	0.147810395	0.28192061	0.245774243	0.187943924	0.198699492	0.070164926	0.061623007	0.202348471	0.213000551	0.210689385	0.226331106	0.058630629	0.074414876	-0.038145487	0.006695994	-0.024572324	0.113824869	0.004186216	0.074377936	0.367072264	0.126128682	0.512652533	0.220043587	0.216016664	0.119971648	0.036985568	0.030644557	0.169528278	0.078902957	0.03640906	0.056032105	0.033421093	0.173540015	0.171014979	0.258128852	0.147112308	0.10625958	0.215351126	0.206105538
ALDH3A2	0.015574164	0.07588294	0.170881718	0.342264244	0.344787433	0.318941423	0.44228381	0.41158871	0.142591234	0.218643531	0.111270105	0.306326282	0.235214136	0.238309687	0.207260712	-0.026979183	0.024928892	0.171037007	0.323487396	0.093883272	0.120523731	0.231145219	0.036056887	0.115019418	0.030660778	0.113017215	0.099812525	0.027104092	0.098261923	0.172981338	0.057237053	0.232073927	0.14620276	0.28773795	0.134917002	0.037882172	-0.088800273	0.096704409	0.080639601	0.064334971	-0.013009713	0.081371887	0.37805907	0.427546923	1	0.352343586	0.007190622	0.195846166	0.360624386
NDUFB7	0.015800295	0.242899448	-0.011798007	0.22979787	0.311937555	0.18890672	0.212855596	0.223625726	0.406553679	0.220583468	0.113988122	0.329759726	0.225198613	0.041578462	0.113407633	0.175896436	0.050408596	0.158511281	0.156166729	0.244094975	0.200106761	-0.028073773	0.106911766	-0.02185781	-0.016699196	-0.078417238	0.024061871	-0.022386301	0.016149893	0.404672664	0.149847649	0.490464222	0.297617462	0.232280838	0.111293484	0.006856353	0.047670728	0.237290432	0.092670378	0.111161727	0.054067396	0.139387786	0.046023824	0.226689742	0.183790935	0.009886319	0.159338968	0.214917809	0.12798751
COX10	0.016061213	0.216445157	0.053399617	0.391822777	0.307086042	0.22626517	0.469903188	0.379034858	0.446894309	0.582213252	0.231584498	0.589968597	0.394757593	0.093749874	0.323742064	0.0381374	0.108286882	0.22027442	0.454078987	0.220674044	0.264418907	0.014599289	0.081805486	-0.016815839	0.011728683	-0.008631175	0.079059474	-0.000191514	0.075105621	0.385904885	0.188535696	0.383489776	0.439813049	0.522158876	0.199238588	0.052919205	0.094421799	0.364945301	0.220564173	0.103741565	0.117698109	0.336857537	0.182656295	0.275273606	0.41354378	0.084292594	0.249880282	0.404448206	0.383985963
ADH4	0.01609999	-0.000369047	-0.010627889	-0.00635403	0.046129311	-0.030674023	0.112911376	-0.028396018	-0.010614252	-0.028922066	0.027936865	0.005518742	0.021368384	-0.018826974	-0.010481919	-0.020791953	-0.025251152	-0.05062257	0.031297856	0.007686366	0.014029325	0.011859579	-0.023870881	-0.001914003	0.7169099	-0.021869736	0.014734027	1	0.327909752	-0.029686225	-0.038717764	-0.009500075	-0.014936822	0.007977248	0.015523431	-0.011955359	-0.0384733	0.004335697	0.008957286	-0.022445286	-0.00367474	0.011265438	0.065192483	0.033712388	0.027104092	0.049728818	-0.003141572	-0.029446602	-0.018144309
COX7C	0.016460519	0.336106669	0.148143697	0.464350476	0.525301883	0.327178383	0.443526967	0.482367619	0.196746376	0.229546947	0.281013331	0.288849726	0.375879003	0.383047206	0.310202928	0.015307202	0.030800812	0.202535763	0.33975024	0.137120931	0.288540307	0.303134292	0.085586342	-0.01546611	0.00084435	0.087323046	0.010183824	0.010043935	0.112236931	0.331456633	0.131804539	0.451997068	0.241169244	0.361039253	0.030231321	0.049035461	-0.033757426	0.235900508	0.068696991	0.087524622	0.01464312	0.005774231	0.397874876	0.079929432	0.342048002	0.362091798	0.038806114	0.12204811	0.398631581
ALDH1L2	0.016463061	0.020589807	-0.015492384	0.081653476	-0.033709462	0.047398545	0.073945088	0.15747587	0.195955328	0.354537785	0.122794565	0.271129773	0.153610366	-0.049566407	0.027125002	0.058832027	0.081166161	0.137572425	0.148901024	0.080476027	0.138029466	-0.104349464	0.061049748	-0.015490319	0.001787399	-0.073207413	0.014828503	0.011265438	0.003062268	0.239838781	0.07364889	0.089532884	0.19201869	0.353539556	0.142180831	0.075308773	0.088336712	0.289071671	0.117696958	0.060854562	0.044337268	1	-0.058685786	0.104222178	0.081371887	-0.092844167	0.14494202	0.090285374	0.056441405
ACSL3.AS1	0.01661521	0.108972853	0.007208612	0.122728216	0.005654744	0.04955551	0.150216182	0.127349209	0.277268629	0.239528742	0.069876884	0.195383464	0.205687508	-0.069723214	0.131179204	0.038227425	0.015457268	0.083293023	0.431885117	1	0.074439259	-0.103647858	0.020081559	-0.023318932	0.013712686	-0.05940552	0.074716276	0.007686366	-0.010976403	0.192020552	0.024083831	0.112960791	0.158230963	0.167724298	0.1103702	0.025133787	0.019552988	0.07970626	0.078816261	0.047649206	0.075759708	0.080476027	-0.058804158	0.094146096	0.093883272	-0.029255006	0.082015279	0.120634603	0.036486915
HADHA	0.017052815	0.310704482	0.09462158	0.476495721	0.320636048	0.265232388	0.336936899	0.440892948	0.424379775	0.638104298	0.362211659	0.611201643	0.572216057	0.155226938	0.436840345	0.069670713	0.118089883	0.379987701	0.517423706	0.210230295	0.360848376	0.131337127	0.132998201	-0.030081705	0.009424193	0.026988847	0.059414141	-0.026451407	0.043340383	0.408924858	0.277388366	0.444172196	0.397570093	0.616428884	0.127220251	0.14452514	0.16256166	0.396269232	0.225987374	0.10640693	0.113797829	0.286486812	0.201623029	0.192490683	0.313941186	0.133154778	0.265953638	0.411123776	0.384423856
PPA2	0.017097479	0.343797423	0.152356149	0.531816885	0.47234232	0.37804321	0.36579871	0.514427953	0.288325599	0.293354816	0.345159996	0.364386935	0.422156335	0.364601754	0.435866366	0.034483493	0.087268764	0.322610171	0.353196799	0.153926962	0.321142594	0.262800314	0.066278763	-0.040451857	0.013003599	0.074399574	0.11346159	-0.012835752	0.104179165	0.373946669	0.212590728	0.466592737	0.225107026	0.409128943	0.035278504	0.04859677	0.061690046	0.304584174	0.10099313	0.037071012	0.044884562	0.090025041	0.368230787	0.13887808	0.362131883	0.325146524	0.084065357	0.244109374	0.408261552
PDC	0.017167947	0.032471971	0.06873834	0.08645038	-0.026537019	0.012207284	-0.004806156	0.006959864	0.00973884	0.051720213	0.004759121	0.018225176	0.007418849	-0.006687282	0.009108429	0.007072836	0.013399489	0.007587563	0.00627329	0.003357113	0.048369542	-0.025821313	-0.008933731	-0.005958259	0.027916194	0.074466428	-0.010153466	-0.008458829	-0.019320712	0.016243487	0.008888379	0.029069316	-0.001089673	0.046285851	0.022306134	0.032256074	0.005049681	0.043023419	-0.008674292	0.001172003	0.024166231	0.014257568	-0.00073146	-0.030308514	-0.031182672	-0.031275774	0.01662376	-0.01174826	-0.002673254
ACADSB	0.017370195	0.278548987	0.294180736	0.403701042	0.365192753	1	0.312282111	0.460984898	0.092457549	0.141631117	0.23153006	0.225209007	0.267638185	0.30926274	0.286592262	0.023763044	0.073484667	0.242343564	0.198460436	0.04955551	0.180518769	0.311134331	0.079504833	0.002448353	0.047892749	0.23287666	0.04298864	-0.030674023	0.064150496	0.169371568	0.067198687	0.222055395	0.098546456	0.264431517	0.057946512	0.025639535	-0.034063181	0.105875915	0.01738405	0.079600103	0.019192115	0.047398545	0.404102752	0.043217827	0.318941423	0.298262503	-0.024090561	0.137671763	0.3891103
COX5A	0.017790266	0.216314287	0.019043837	0.294050828	0.289373547	0.172177758	0.252592873	0.329463703	0.522758561	0.333475104	0.126885477	0.555019703	0.318220412	-0.042876063	0.158606222	0.04483545	0.034091964	0.161002172	0.335918831	0.258589666	0.208030888	-0.09255542	0.066057324	-0.027707113	-0.00281505	-0.131989287	0.088652898	0.011078298	0.073200309	0.520313702	0.073819916	0.451383405	0.411867545	0.395987923	0.222161826	0.009531801	0.053955744	0.270681649	0.25553692	0.076698519	0.161241717	0.203515464	0.058688477	0.232764598	0.253045452	0.026227574	0.257138059	0.317603169	0.285801387
NDUFV3	0.018841582	0.310709747	0.15347023	0.468935173	0.494966603	0.342620547	0.459961578	0.458802957	0.270012051	0.424794544	0.353244918	0.445563035	0.480010187	0.354373792	0.442682515	0.114879254	0.211861339	0.335267428	0.379852415	0.155496597	0.272540918	0.272450171	0.139821601	-0.03884374	0.030378752	0.102368861	0.07385089	-0.022013047	0.095326018	0.386347033	0.278937985	0.549048025	0.351741437	0.447465341	0.077323592	0.069092672	0.037201068	0.328080782	0.084483179	0.149048915	0.040695312	0.183584532	0.363739157	0.096132261	0.320378991	0.282374123	0.091666335	0.295245604	0.488756341
NDUFS3	0.019341425	0.353797912	0.018711627	0.412044175	0.363414661	0.222252984	0.329308313	0.356668318	0.483640841	0.357614481	0.219245688	0.449314533	0.37557446	0.128274292	0.29787407	0.107548264	0.085989692	0.217289843	0.306756093	0.26600507	0.242410273	0.026740789	0.120082414	-0.043828006	-0.011884293	-0.080797141	0.070878288	-0.008772046	0.052075645	0.457695227	0.162170926	0.551298097	0.369342986	0.386625054	0.141606913	0.058347255	0.075985748	0.307648049	0.132541596	0.103553829	0.090479426	0.124032787	0.157387502	0.147055512	0.236474696	0.064940958	0.372656894	0.339944228	0.276286476
PFKM	0.019396955	0.120041435	0.009929597	0.276659287	0.140252816	0.098438387	0.186131693	0.213216166	0.369748542	0.502452708	0.13675382	0.521167484	0.25226385	-0.006351633	0.218779241	0.027781098	0.10952806	0.172585322	0.329705929	0.18980309	0.183610285	-0.047633664	0.056023903	-0.022318855	-0.018616238	-0.053029078	0.047759757	-0.033391875	0.060483148	0.337030549	0.107602713	0.232513626	0.34120155	0.428790246	0.134391539	0.046105427	0.067267953	0.29707469	0.185401363	0.118317682	0.118685055	0.311964063	-0.00886046	0.191225304	0.205096207	-0.054333442	0.261537292	0.268834182	0.179890931
NDUFS2	0.019472588	0.301563595	0.079231279	0.480275939	0.381144233	0.309749367	0.47000292	0.431942635	0.342732644	0.528444476	0.346589804	0.530080466	0.412875322	0.189721243	0.384089183	0.043712792	0.186820375	0.276814752	0.452661355	0.175270714	0.271717074	0.150689869	0.090678375	-0.032898637	0.016286973	-0.036203102	0.007812435	0.02462845	0.114041021	0.387531782	0.123688077	0.365983092	0.414486778	0.551089323	0.071481704	0.044459842	0.04822457	0.348692651	0.202253544	0.142645671	0.086927163	0.215720278	0.291029104	0.207987473	0.361794607	0.237921406	0.192769157	0.292602347	0.443767142
CYP4A11	0.019623003	0.073402061	0.093644705	0.134790785	0.100013156	0.134931884	0.136451617	0.208516815	0.029166067	0.001252397	0.06821296	0.067699018	0.242702171	0.097612618	0.0991927	0.066669262	0.082130773	0.035375916	0.087544761	0.05985064	0.162431033	0.08790354	-0.009656177	0.003831482	0.201489208	0.122099648	0.011026341	0.017519213	0.097894583	0.035301946	0.036946055	0.066238389	-0.00251238	0.044872473	0.031774387	0.014803	-0.035567545	0.022362431	0.010099539	0.055165788	-0.001244592	-0.010011103	0.13777351	-0.02908344	0.079579481	0.099580065	-0.024373808	0.034220229	0.178835297
OGDH	0.019916967	0.23577688	0.120247406	0.344454651	0.297909679	0.152114137	0.328293417	0.279055362	0.294027591	0.520444937	0.314567786	0.553944478	0.441250535	0.164635512	0.373715498	0.023829787	0.104883407	0.382259451	0.434954339	0.166975014	0.257764094	0.121688965	0.060983376	-0.020755479	0.008738141	0.077536696	0.002377132	-0.034624268	0.027953843	0.361828891	0.390364525	0.39827325	0.400978156	0.407414723	0.043289913	0.085647084	0.181981889	0.302972413	0.169439334	0.110376627	0.066658162	0.208802206	0.167672497	0.154592049	0.243458232	0.123780779	0.324834092	0.383224882	0.329878115
HMGCL	0.020223396	0.417589252	0.234006937	0.527621127	0.586792229	0.36089602	0.468550125	0.506386185	0.111396445	0.239620161	0.306189386	0.318452984	0.461629498	0.437806704	0.545737828	0.059872776	0.121600809	0.364930987	0.342241366	0.089706711	0.23800341	0.428703729	0.070388753	-0.015293375	0.033944127	0.192233018	0.090424841	0.002149396	0.142362328	0.308809052	0.253894131	0.574352725	0.145284822	0.341607376	0.049075509	0.124968375	0.073459769	0.21229102	0.050247692	0.109642461	0.037998742	-0.03973255	0.442050399	0.039555007	0.339917784	0.452716747	-0.01942506	0.32655798	0.392164143
CYP2U1	0.020253824	0.365800429	0.274868428	0.353349412	0.212021214	0.216916001	0.127984955	0.274880606	0.095742383	0.255951282	0.315628413	0.230220383	0.341127376	0.283495208	0.292435985	0.144067137	0.123505634	0.382880408	0.200441539	0.016038001	0.285847164	0.276240849	0.220343478	-0.016521126	0.065801325	0.453361976	-0.003450239	-0.051537673	0.004978046	0.268829548	0.295405049	0.303716181	0.118742791	0.285509426	0.032125614	0.260090714	0.130053551	0.335807574	0.03110895	0.030515584	0.035920655	0.132505962	0.243860481	-0.090697583	0.154898484	0.087663317	-0.030905053	0.105619456	0.259467293
PFKFB3	0.020420756	0.163803015	0.019514464	0.178859902	0.172076476	0.135607452	0.213630982	0.109288635	0.069533944	0.332233932	0.313455953	0.229044845	0.323366532	0.182676706	0.244748801	-0.013225894	0.057676227	0.287065927	0.224157535	0.09089883	0.252215456	0.184087401	0.064901564	-0.032073548	0.022172155	0.076994379	0.001518298	-0.017838652	-0.032191276	0.177931766	0.29025008	0.223959932	0.184067428	0.264055939	-0.028865141	0.040611713	0.193934366	0.23283397	-0.001982302	0.029792269	-0.054090338	0.14382143	0.106004266	-0.001998338	0.046693436	0.055989587	0.057065935	0.149852546	0.189505259
ALDH7A1P3	0.020497489	-0.039430001	0.002274616	-0.051709032	-0.016060593	-0.011050669	-0.022273092	-0.047616922	-0.028132287	-0.050339334	-0.053156067	-0.053132984	-0.051929755	-0.033006535	-0.005395843	0.024422808	0.115566456	-0.030349449	-0.027679596	0.040606976	-0.04775069	-0.051887964	-0.003318914	0.10396834	0.018076518	0.00222674	-0.025734231	0.022102108	-0.015809841	-0.032767878	-0.051597741	-0.066804413	0.024432162	-0.068336761	-0.006084369	-0.029609908	-0.03175785	-0.062285139	-0.012411411	0.129099539	0.055556355	-0.002361581	-0.02202326	-0.026937099	-0.071294746	-0.04603764	0.016706998	0.023996125	-0.048052353
SDHD	0.020908113	0.240678908	0.038175983	0.406936423	0.264536105	0.22147503	0.169933901	0.399336153	0.470630608	0.336940757	0.188350715	0.49948341	0.36628666	0.008551739	0.24179841	0.039829123	0.055550904	0.245292034	0.324205951	0.22448303	0.297595573	-0.02943028	0.06061519	-0.045873411	0.005965929	-0.030360229	0.123900406	-0.025912258	0.038333281	0.441445696	0.264111217	0.460104901	0.255136695	0.330882373	0.184848447	0.040697888	0.145392802	0.264473162	0.178381536	0.024834196	0.103748841	0.225555451	0.084250523	0.256599006	0.239369523	0.002895988	0.27204223	0.32918197	0.269941187
COX15	0.02148108	0.329658897	0.129930853	0.547156791	0.428885763	0.384798522	0.452288753	0.538969546	0.344405372	0.513340142	0.338774416	0.51074442	0.483999049	0.270247481	0.408488375	0.068613405	0.131923194	0.267139773	0.521776676	0.159619531	0.367597814	0.282590834	0.114384705	-0.034115921	0.007829004	0.072714185	0.097329894	0.009533819	0.162218467	0.384599047	0.191853973	0.440138971	0.312940609	0.69157595	0.09147453	0.093293979	0.095677658	0.346969952	0.17065167	0.107635204	0.056457444	0.233299809	0.337283867	0.169611347	0.412218285	0.336691876	0.158897563	0.327194689	0.477679225
ECHS1	0.022069899	0.315300247	0.103051914	0.494480414	0.4921996	0.341372042	0.472756465	0.500451301	0.307983127	0.338373778	0.27415272	0.402373556	0.403760163	0.239515339	0.418352111	0.057639662	0.062516431	0.200644292	0.397757942	0.18959004	0.239418561	0.268388243	0.06310537	-0.024543383	-0.020472535	0.003451157	0.147429002	0.010414118	0.152334221	0.36360054	0.148831528	0.511899126	0.33513105	0.574976276	0.09919716	0.036778529	0.116923249	0.289756907	0.167238813	0.090413079	0.076624472	0.13817949	0.365908476	0.148697838	0.381433553	0.351075023	0.155204633	0.344220851	0.371962576
ATP12A	0.022134309	-0.033219054	0.015322571	-0.043840333	-0.011804699	-0.015567665	0.04500238	-0.029552152	0.108627097	0.097344684	-0.019714871	0.179928742	0.127100364	-0.101776281	0.026815575	0.016597258	0.007055612	0.068618693	0.078425203	0.063528923	-0.043415275	-0.067194497	0.010631518	-0.011360586	-0.001447999	-0.01769974	0.035332615	-0.023881136	0.072819934	0.099142	0.049515546	0.030482702	0.103795353	0.03568654	0.13361615	0.063636572	0.110038212	0.02924517	0.034788577	-0.006748743	0.023773611	0.119239886	-0.061869741	0.07993373	0.034736708	-0.070569877	0.148453914	0.102007867	0.010048699
COX11	0.022435208	0.429679338	0.099922733	0.481990095	0.429804649	0.335218695	0.314589646	0.425853931	0.327252254	0.48982152	0.359587576	0.30975715	0.518794507	0.308649834	0.254070997	0.061704185	0.15292138	0.276939063	0.319576492	0.188004757	0.293607978	0.339364497	0.205649368	-0.002225871	-0.006320677	0.081692676	0.046691956	-0.022567042	0.075056403	0.383333822	0.256401485	0.411130054	0.139440614	0.44653403	0.109189413	0.080132013	-0.002584906	0.334783717	0.020988787	0.079591729	0.023017162	0.171545444	0.240276838	0.08417377	0.335403927	0.186736377	-0.007169556	0.096819944	0.388967909
ADH1B	0.022963836	0.184006902	0.524666288	0.143483333	0.181888454	0.23287666	0.148077785	0.147490005	-0.149707925	-0.07734892	0.103983306	0.03282156	0.130684447	0.294270809	0.142718713	0.108981522	0.056309208	0.187755442	0.040443222	-0.05940552	0.129260437	0.328266721	0.045471396	0.001439864	0.201319142	1	-0.026105007	-0.021869736	0.037116667	0.037915781	0.080041319	0.048493965	-0.012931421	-0.055394922	-0.031272313	0.154365176	0.019313416	-0.066298509	-0.049092037	0.029298063	-0.023261121	-0.073207413	0.355997418	-0.068845364	0.113017215	0.301577961	-0.112548881	-0.024081454	0.229076815
NDUFA10	0.023030838	0.08340633	0.128991375	0.220635166	0.132362415	0.106982882	0.151062651	0.182593443	0.118992294	0.203523245	0.084243443	0.181280969	0.168918863	0.105914102	0.144351126	0.027634954	0.035330034	0.065237545	0.251774652	0.109225376	0.068588023	0.031633811	0.028697731	-0.009086966	0.003517194	-0.012969187	0.042450138	-0.001244631	0.016658694	0.116029291	0.029070641	0.16745235	0.117756849	0.279488557	0.076276393	0.242221853	0.013428574	0.082874946	0.057861025	0.041530065	0.038519532	0.155954752	0.098659285	0.046373008	0.124621229	0.116755293	0.099013089	0.110751408	0.171325796
NDUFS6	0.023500883	0.119866102	-0.066473172	0.224158439	0.187560172	0.063888535	0.213927984	0.143879452	0.413582722	0.283082762	0.137866412	0.36928715	0.192953309	-0.078343718	0.256380894	-0.009432675	0.044101376	0.070137791	0.227493435	0.222468096	0.114947955	-0.08062562	0.035246791	-0.030952442	-0.03139964	-0.155753487	0.141160423	-0.022003511	0.010707192	0.249465982	0.091729161	0.352232652	0.316839381	0.320056498	0.134511449	0.023165889	0.149689848	0.191009071	0.207569136	0.093254773	0.115303962	0.099571882	-0.002103527	0.096136711	0.119157181	-0.045694416	0.243725537	0.381523145	0.125689308
ALDH2	0.023546738	0.266035769	0.307588876	0.356503558	0.516762308	0.404102752	0.468907633	0.456318104	-0.054131651	0.028427811	0.2572584	0.091373067	0.269376271	0.487646799	0.410992884	0.048899577	0.035955959	0.227233919	0.192020165	-0.058804158	0.20887112	0.453833819	0.06023238	0.010520967	0.110064611	0.355997418	0.100259944	0.065192483	0.200452414	0.134960417	0.068253932	0.257856235	0.112640098	0.242677942	0.038637063	0.082337062	-0.081140367	0.051201338	-0.026593128	0.079910506	-0.055945233	-0.058685786	1	0.021266846	0.37805907	0.563672994	-0.085437787	0.067994522	0.414318297
ALDH6A1	0.023563847	0.230175921	0.307819309	0.477195634	0.498753555	0.477285251	0.391225195	0.592796104	0.029845566	0.228054369	0.351535576	0.271788067	0.380668044	0.504521924	0.39828229	0.005721593	0.09619045	0.319520243	0.336999209	0.044872594	0.181862865	0.459908832	0.047832089	0.0055379	0.039239915	0.235015728	0.088558063	-0.025928392	0.145617011	0.168158878	0.111860979	0.207656315	0.058873924	0.298120896	0.008592186	0.096193327	-0.05829643	0.114143385	-0.001692315	0.044365405	0.001320258	0.002704759	0.510997939	0.035573786	0.473905942	0.526774903	-0.057522122	0.137167341	0.570665022
PFKFB2	0.024014766	0.180359725	0.250028057	0.300114353	0.397122996	0.273485738	0.21307163	0.323902972	0.022622277	0.19413856	0.268148261	0.185494879	0.313279272	0.37777981	0.211800569	0.01760309	0.120314441	0.205409333	0.196826186	0.064138701	0.138579063	0.3499244	0.022947298	-0.022418292	0.080774963	0.129903616	0.012035302	0.010502664	0.155690512	0.12724049	0.169570648	0.158678695	0.041344736	0.233835798	0.002076414	0.083163334	-0.002651348	0.147718794	0.010586754	0.030118382	-0.007551476	0.027799147	0.230637751	-0.023963898	0.127557011	0.157133495	-0.003807917	0.115661803	0.323245272
ATP4B	0.024328802	-0.020969342	-0.018239105	-0.010700088	0.010895778	-0.014271231	0.030076404	-0.008663783	0.01833395	0.024950794	0.005011046	0.005686748	-0.001984182	-0.017914142	0.048158098	0.004715882	-0.004588333	0.029826774	-0.003097285	-0.009248912	-0.019177558	-0.016409549	-0.00862343	0.000518572	-0.008797379	-0.005517806	-0.006856333	-0.001960711	0.002462251	0.010665281	-0.014432905	-0.006095118	0.046386679	-0.02511605	0.011440533	-0.006664363	-0.018888769	-0.008417942	-0.008592861	-0.012909697	-0.01055542	0.041231085	0.008780881	0.020047527	0.003911846	-0.010320824	0.030469918	0.006120642	0.023743595
ACADL	0.024585831	0.153464931	1	0.150276246	0.227118237	0.294180736	0.19960049	0.260056124	-0.041127385	-0.016164252	0.096669563	0.144807318	0.110681388	0.202500495	0.148594112	0.063004468	0.042089924	0.281403573	0.10552931	0.007208612	0.110660421	0.160064276	0.006141675	-0.016791001	0.093182353	0.524666288	0.014084795	-0.010627889	0.066439499	0.127641663	0.020568144	0.095689679	0.089957698	0.037314978	0.039107292	0.076929574	-0.037754653	-0.029966576	-0.007700086	0.052931537	0.036551996	-0.015492384	0.307588876	-0.013314234	0.170881718	0.281781943	-0.029103777	0.035744249	0.235950988
MDH1	0.024656939	0.182940398	0.012526073	0.256433218	0.1264332	0.137004	0.095296277	0.163978245	0.554196829	0.390747427	0.091434395	0.517382259	0.299596985	-0.123072413	0.227308933	0.022054306	0.040935756	0.134476156	0.281685088	0.2642029	0.172772954	-0.162582933	0.10048059	-0.033599753	-0.014700163	-0.108559967	0.297923645	-0.018022382	0.022360055	0.345320223	0.089335304	0.333795961	0.338769427	0.320941598	0.255246217	0.007590345	0.07811673	0.219612041	0.146743164	0.042144446	0.194982147	0.185053694	-0.028388665	0.163284374	0.152955861	-0.132026556	0.283291516	0.352532273	0.152321756
PPARD	0.024863629	0.154267039	0.010142288	0.204857138	0.196095543	0.04363178	0.296108297	0.133959077	0.200947076	0.424960636	0.310317671	0.340386521	0.376062079	0.128726829	0.31825971	0.010852173	0.109483547	0.277103593	0.288366406	0.070568724	0.268776287	0.13872812	-0.029671921	-0.03541985	-0.000923729	-0.013746609	0.006962201	-0.019658972	-0.003664183	0.28551028	0.327352659	0.310483713	0.318378728	0.353154091	-0.043990587	0.007522273	0.243433826	0.279265581	0.087971478	0.098443689	0.020942182	0.2053416	0.086835578	0.0650799	0.086462453	0.081646041	0.306169543	0.317347223	0.260969489
NDUFS1	0.025593534	0.339162207	0.104500773	0.569679656	0.324659882	0.303266213	0.326352662	0.435751951	0.401613757	0.579075153	0.365120842	0.606026318	0.542312172	0.191488688	0.40296844	0.068992272	0.114441689	0.32080323	0.613730093	0.294165596	0.375094922	0.1454461	0.111110856	-0.021143417	0.030149169	0.017016524	0.059052461	0.036827086	0.114601679	0.343402944	0.203268794	0.407435137	0.299173304	0.62122442	0.140319198	0.142476128	0.087524343	0.365913948	0.178136527	0.058928223	0.075348297	0.290410917	0.222876034	0.163064892	0.374483435	0.195542703	0.173228366	0.305812311	0.42803289
NDUFA11	0.025753978	0.248616982	0.001635229	0.225852722	0.294403047	0.134132743	0.262152985	0.17814088	0.433926441	0.204245512	0.109709561	0.338435037	0.183400481	0.055126175	0.174941851	0.086726765	0.114283697	0.119251112	0.120151129	0.20771362	0.16275475	-0.059971545	0.100389248	-0.020719875	-0.013512973	-0.082745161	0.038363084	-0.030882813	0.008331656	0.431856612	0.123324505	0.521642997	0.376522542	0.254243121	0.11514474	-0.017693547	0.066328218	0.285932143	0.109467225	0.099509655	0.088741104	0.127527169	0.0412736	0.088203853	0.166917882	-0.046619625	0.18289497	0.256994825	0.109040907
SDHB	0.026070513	0.402442389	0.048207543	0.577771447	0.424497428	0.274697927	0.306112996	0.431482315	0.488185482	0.393238825	0.271810512	0.511114039	0.436720941	0.134179689	0.376170238	0.054005265	0.091127516	0.299222691	0.384640066	0.231726798	0.338338395	0.1144651	0.10291916	-0.027829408	-0.015539879	-0.028362462	0.080405551	-0.011925692	0.073341802	0.494583831	0.243970851	0.64845961	0.335897299	0.444266826	0.114888887	0.062039813	0.169232185	0.339529412	0.152163614	0.077947664	0.077719932	0.136317305	0.175665934	0.104443886	0.232851996	0.092118729	0.170568389	0.439375808	0.301468614
PKLR	0.026118016	0.01097885	-0.041178076	0.034855557	0.008378012	0.041369662	0.05840672	0.119052668	0.115469283	0.079235655	0.028610771	0.077183744	0.175015791	-0.019566436	0.002949352	0.031222198	0.066263702	0.000870355	0.050442859	0.037550356	0.102959726	-0.057075544	-0.012750976	0.002884815	0.085676748	-0.02910673	-0.020073318	0.000514962	0.05267595	0.058781562	0.024394339	0.021043135	0.020231904	0.04358261	0.02666349	-0.004529088	0.009079626	0.048824062	0.03658757	0.020779215	0.000591402	0.116883032	-0.010530891	0.114866799	0.019654789	-0.038840544	0.040139914	0.06506528	0.067573113
CPT2	0.026510488	0.416281245	0.243943334	0.627249082	0.536814667	0.430391396	0.466803055	0.531742635	0.180541262	0.391768743	0.35990917	0.451874682	0.516247362	0.425801426	0.516857531	0.047180982	0.13320449	0.395375813	0.43123647	0.122757313	0.268821751	0.399464414	0.060378228	-0.029330263	0.053049014	0.220092289	0.043252324	-0.02363411	0.13840663	0.332944176	0.240320892	0.582274639	0.230556792	0.441864441	0.121924856	0.10604328	0.045459673	0.249889472	0.063422134	0.139895336	0.036093753	0.073241731	0.424513058	0.037965791	0.359130425	0.365244886	0.066198616	0.294765041	0.492530776
NDUFA8	0.026643626	0.204887166	0.050278053	0.370505301	0.33583434	0.162525126	0.308247908	0.371386748	0.469705261	0.372461377	0.20650646	0.527194894	0.297721048	0.054030949	0.200716046	0.019395957	0.093031531	0.244793341	0.360407067	0.243287495	0.189911373	-0.01246888	0.099709439	-0.031852298	-0.03415091	-0.102170357	0.055354003	-0.01074378	0.05812625	0.444097439	0.147783876	0.470556266	0.338438196	0.385145358	0.14248833	0.040327408	-0.00020809	0.306598587	0.161045439	0.132461388	0.11508047	0.149640759	0.133669884	0.289722887	0.355805904	0.119486645	0.221252401	0.299341393	0.288595667
ALDH7A1P1	0.026719749	0.253352413	0.053448614	0.300379502	0.133368257	0.198098096	0.193855159	0.258557075	0.057426714	0.165015362	0.233979696	0.112817233	0.198698399	0.374873664	0.181829456	0.028698161	0.142494742	0.18644323	0.169865505	0.009702945	0.268241164	0.208745881	-0.007678081	-0.009310132	0.015902183	0.086278861	-0.019981776	0.010174182	0.00846898	0.097765609	0.114320452	0.156358672	0.032231183	0.254303374	-0.047867383	0.076586505	0.057188648	0.21544465	0.007437148	-0.007751499	-0.017454699	0.044736003	0.278928637	-0.01790893	0.172339428	0.163424353	-0.046118305	0.072933575	0.225913092
GPI	0.0269014	-0.003040863	-0.049495379	0.068748775	0.011028951	-0.002772983	0.13924178	0.099206309	0.535457542	0.414317515	0.065089871	0.501082989	0.14809465	-0.21292892	0.013603921	-0.030690622	0.078540043	0.099856802	0.243560906	0.226915742	0.07085889	-0.25007142	0.052541344	-0.029643984	-0.019622947	-0.197326815	0.130975985	0.010163634	0.014295416	0.291563057	0.095597984	0.213356578	0.350124268	0.269345726	0.21909675	-0.014745756	0.002927803	0.252968335	0.188479148	0.052663591	0.110382677	0.313827902	-0.114684382	0.345396676	0.247407992	-0.196388759	0.26678325	0.305758176	0.112024621
COX17	0.027256594	0.221941861	0.024021104	0.287008904	0.296977482	0.119853352	0.330922443	0.271193951	0.37312993	0.283488047	0.117990064	0.372604439	0.232420796	0.038249344	0.236950695	0.034544334	0.089552764	0.156775341	0.308445866	0.279143406	0.081610102	-0.013854504	0.07550125	-0.007827369	-0.033004688	-0.119252585	0.089668434	-0.015102912	0.051690788	0.346024602	0.071698806	0.395047635	0.301405155	0.331310581	0.128357551	0.052410969	0.054655948	0.199055958	0.229888956	0.151717615	0.139155467	0.110263117	0.099072641	0.089081771	0.217714896	0.09165748	0.217538649	0.204236144	0.206219426
ACAA2	0.028042829	1	0.153464931	0.435414584	0.300318915	0.278548987	0.229079546	0.351723335	0.206254996	0.254182638	0.246825815	0.143830938	0.319028777	0.286246536	0.297486187	0.068860776	0.144262279	0.278803383	0.211317979	0.108972853	0.303361738	0.253317524	0.102062847	0.025650819	-0.001899042	0.184006902	-0.003295137	-0.000369047	0.0955217	0.249492147	0.118628123	0.348658278	0.05462319	0.285332937	0.010759613	0.156056926	0.065713862	0.256861585	-0.015885037	-0.003174904	-0.013000305	0.020589807	0.266035769	-0.118772697	0.07588294	0.159890543	-0.03010156	0.058385381	0.184573781
ALDH1L1	0.028855198	-0.015885037	-0.007700086	0.049252832	0.109794304	0.01738405	0.116003261	0.066059078	0.142033025	0.09294409	0.034508256	0.25232628	0.083789538	-0.076632313	0.090446983	0.06924332	0.048223353	0.115398101	0.119674108	0.078816261	-0.005228765	-0.062260127	0.012669956	0.005520003	0.018045438	-0.049092037	0.005485463	0.008957286	0.075200187	0.1117728	0.031736583	0.059352826	0.229798897	0.143619261	0.102971601	0.024596131	0.11245434	0.087162218	1	0.292683692	0.610042191	0.117696958	-0.026593128	0.114364849	0.080639601	-0.044329989	0.179704624	0.206257648	0.112222451
HADHB	0.028880426	0.315196365	0.139580682	0.51280653	0.416748617	0.333932729	0.429128099	0.485210649	0.329044457	0.525749815	0.363738379	0.534269862	0.568625536	0.206383707	0.432640087	0.074256314	0.138432777	0.342119353	0.467392487	0.179528311	0.351881371	0.22369351	0.167808567	-0.029759103	0.016695594	0.060637238	0.066131205	-0.016487677	0.066561749	0.454127787	0.284675055	0.472944068	0.40235453	0.580371179	0.1165874	0.128759018	0.151604152	0.361535164	0.216275496	0.119359749	0.11644908	0.253153143	0.280544809	0.174111549	0.380530934	0.210265163	0.213943041	0.388491872	0.468826653
PPAN	0.031046648	0.0173641	-0.038302039	0.037827619	0.122690074	0.035247941	0.296624526	0.070382692	0.347445051	0.342800529	0.039755442	0.349618239	0.087525018	-0.068853444	0.108432062	0.109890578	0.202217281	0.07680152	0.129473898	0.217334307	0.034491656	-0.160612861	-0.001808803	-0.023567861	0.005748451	-0.154140978	0.026182278	-0.015144213	0.013412714	0.344303211	0.008467014	0.254993897	0.4878433	0.271923886	0.120897594	-0.051342486	0.01954236	0.216681036	0.072888847	0.163127261	0.057440702	0.30494695	-0.029384914	0.09556817	0.066134983	-0.133595623	0.248340672	0.235303061	0.133288041
NDUFB3	0.031083317	0.230766391	-0.008875463	0.414689026	0.253438132	0.162859798	0.228325383	0.276046517	0.426262022	0.36148947	0.221035566	0.423739971	0.334926126	0.052915576	0.261305676	-0.014137242	0.059223152	0.197734546	0.382050701	0.223764354	0.248734563	0.016934546	0.057549979	-0.038729863	-0.002683777	-0.076800378	0.106311304	0.000610167	0.052400269	0.382762185	0.177839695	0.45286701	0.277578733	0.369319989	0.148099397	0.086311745	0.108517518	0.306643596	0.158751346	0.052333756	0.061129637	0.2321968	0.095927452	0.202561496	0.244130998	0.066689648	0.191955689	0.254442886	0.21025712
AKR1A1	0.03163839	0.348658278	0.095689679	0.466412586	0.398312295	0.222055395	0.325172077	0.290530127	0.31963354	0.27384794	0.235616755	0.393062177	0.379314163	0.212565354	0.346581256	0.051014083	0.105454584	0.319906742	0.272599539	0.112960791	0.293179037	0.173386982	0.053010812	-0.039833269	0.026099333	0.048493965	0.120585868	-0.009500075	0.082700808	0.392156206	0.269829523	1	0.348546833	0.38766606	0.235315978	0.078633156	0.111466182	0.313051182	0.059352826	0.092782334	0.018817364	0.089532884	0.257856235	0.065425847	0.232073927	0.125113505	0.111009606	0.339922617	0.264841655
NDUFB5	0.031659474	0.049358388	-0.010649108	0.199364089	0.117096431	0.063707861	0.03778559	0.142340494	0.549897715	0.311133033	0.01581136	0.466469186	0.17253789	-0.18007951	-0.010391095	-0.00130292	0.022364992	0.127062685	0.172712309	0.182709361	0.102750919	-0.199049691	0.078432897	-0.021459477	-0.032505442	-0.142187767	0.071048929	-0.030213318	-0.015541157	0.437625952	0.136758708	0.303475801	0.24476802	0.217126263	0.188967174	-0.029985088	0.037631337	0.224928822	0.163546613	0.056217718	0.136923801	0.261148743	-0.129017043	0.282146597	0.21764145	-0.171726797	0.260876799	0.248511434	0.138939099
ADPGK	0.031933586	0.249492147	0.127641663	0.305877786	0.299966896	0.169371568	0.295951222	0.283519551	0.298188439	0.336178556	0.210024724	0.385781384	0.303553539	0.111509633	0.219875417	0.049467607	0.115356748	0.285452694	0.283672147	0.192020552	0.25572723	0.059374943	0.077957415	-0.028864617	0.002391977	0.037915781	-0.008099869	-0.029686225	0.026495955	1	0.200202802	0.392156206	0.350161972	0.336987598	0.065180022	0.062820169	0.135843404	0.291337219	0.1117728	0.121162009	0.074577347	0.239838781	0.134960417	0.08377023	0.172981338	0.080538295	0.113009741	0.193822413	0.2723267
DLST	0.032002687	0.323478475	0.11759855	0.478844131	0.434770862	0.275196149	0.412053202	0.394354137	0.323647026	0.463301418	0.286724112	0.519709122	0.42213158	0.251141415	0.409671525	0.063356943	0.084366539	0.3158682	0.477030365	0.221935271	0.321209165	0.21443136	0.068748451	0.029198454	0.024977127	0.066294956	0.056631092	-0.020275147	0.094436086	0.425341304	0.222604053	0.418615664	0.367310502	0.422179215	0.047886186	0.092431909	0.202929521	0.315345219	0.129676543	0.055976662	0.044093341	0.223359634	0.19387675	0.205165975	0.348309494	0.182124327	0.211002412	0.432465545	0.342521718
NDUFA13	0.032095995	0.258822147	0.040009155	0.240976416	0.356003485	0.219191531	0.297703732	0.256549333	0.362397974	0.183510269	0.126850047	0.291372678	0.224469659	0.107265366	0.229867386	0.10255438	0.055942058	0.148096813	0.159536614	0.240656196	0.159135613	0.021520325	0.09256287	-0.026431383	-0.021459607	-0.055834684	0.043162836	-0.01643635	0.02653187	0.386970588	0.116372396	0.494535181	0.30876732	0.240272981	0.088140996	0.033548488	0.013721471	0.210933067	0.096348856	0.120236273	0.08395302	0.076315693	0.167648879	0.175228747	0.218278117	0.114227044	0.151267838	0.230004173	0.166368172
MINPP1	0.032573135	0.423066332	0.033134336	0.525514233	0.286366471	0.32206831	0.235680044	0.364710653	0.272755957	0.417427271	0.299361985	0.350044072	0.38767244	0.206643499	0.295204003	0.012300255	0.087847301	0.220381361	0.37848989	0.100030747	0.359878375	0.211417399	0.090893133	-0.014393536	-0.029689287	0.020528953	0.024857377	-0.014160281	0.067766995	0.429536889	0.27185774	0.360448882	0.183081476	0.522298386	0.065566666	0.10393618	0.164180697	0.394257368	0.127046511	0.053451348	0.07749177	0.197557736	0.183125237	0.053706351	0.228444584	0.179568261	0.093178587	0.174329892	0.310179362
ALDH7A1P4	0.032962251	-0.025312561	0.072553099	-0.03276583	0.012270006	-0.014418918	-0.027779496	-0.035441366	-0.073288252	-0.028704747	-0.001886553	-0.011897772	-0.007252936	0.043642541	-0.01613548	0.007851983	0.070228872	0.004302431	-0.026715789	-0.007306483	0.005748193	0.043933589	-0.011507857	0.0725834	0.038776509	0.098396938	-0.023109599	-0.006904327	-0.003850823	-0.045365144	-0.006841033	-0.064081444	-0.016608355	-0.047408631	-0.03437837	-0.000441133	-0.014064325	-0.020650162	-0.007159587	0.088895862	-0.004803533	-0.024302459	-0.016451545	-0.026518781	-0.016298312	0.02046566	-0.035208406	-0.008468265	-0.010010999
IDH1	0.033509672	0.19409679	0.183325424	0.39308275	0.279630551	0.227693886	0.268471544	0.392395233	0.309521272	0.39445859	0.241153697	0.423238787	0.453714762	0.150898403	0.277416194	-0.034937654	0.045532442	0.329909903	0.528014882	0.171640382	0.27605175	0.106056054	0.037153672	-0.016055018	0.023637982	0.004686868	0.202004	0.059509307	0.092620292	0.262688249	0.13973735	0.372358021	0.194401343	0.426208595	0.246854078	0.184175276	-0.045187387	0.265993482	0.112356038	0.014203399	0.04639718	0.161507401	0.295185197	0.241965066	0.429331382	0.297475816	0.107538748	0.1988694	0.366419913
ALDH5A1	0.034734341	0.184573781	0.235950988	0.396626481	0.448789989	0.3891103	0.403614919	0.459731588	0.075772305	0.277820855	0.290572728	0.315537059	0.430915813	0.350651885	0.30070462	0.045531883	0.127777615	0.231533321	0.31029389	0.036486915	0.203581751	0.374909652	0.044108883	-0.027174833	0.058646043	0.229076815	0.00146853	-0.018144309	0.106839395	0.2723267	0.163512933	0.264841655	0.233775545	0.404060978	0.05619201	0.001534748	-0.092335228	0.144079444	0.112222451	0.110682301	0.082332501	0.056441405	0.414318297	0.060652389	0.360624386	0.416259895	0.017950472	0.149409547	1
NDUFA7	0.036371972	0.156406808	0.032645131	0.181252889	0.243902781	0.149318868	0.290533039	0.191985609	0.397884441	0.224174483	0.046665229	0.347682523	0.163632278	0.027157516	0.133413528	0.135226302	0.147439593	0.086634759	0.161765333	0.240566204	0.095678135	-0.071467794	0.094168284	-0.029822568	-0.010987323	-0.085943795	0.031557926	-0.019081288	0.046070601	0.368766248	0.069585359	0.391570155	0.36276285	0.260179543	0.13529922	-0.042196282	0.03434341	0.199132566	0.094124027	0.119921213	0.084718815	0.164407665	0.065667397	0.13354068	0.213249015	0.004606303	0.133254919	0.264016758	0.163148997
ADH1A	0.036584836	-0.001899042	0.093182353	0.017478457	0.070251946	0.047892749	0.083002405	0.021428531	-0.013027046	-0.030062058	0.004118368	0.061805683	0.050798625	0.046436485	0.034375357	0.033994319	0.037233252	0.01132924	0.020365802	0.013712686	0.015079586	0.030694184	-0.017254754	0.005997915	1	0.201319142	0.041226058	0.7169099	0.185628284	0.002391977	-0.005669858	0.026099333	0.02048574	-0.024336121	0.024834015	0.021144029	-0.010853183	0.012239112	0.018045438	0.036543604	0.009133698	0.001787399	0.110064611	-0.000243972	0.030660778	0.030046823	-0.00776374	0.028160903	0.058646043
HADH	0.037319987	0.369431905	0.188192432	0.470197525	0.369550732	0.351514032	0.252209845	0.396100499	0.412245993	0.277921352	0.247409674	0.469239357	0.332027052	0.20068101	0.426740064	0.095729547	0.14168833	0.387730347	0.254705177	0.115934777	0.231832056	0.157782391	0.071971712	-0.032289977	0.021613582	0.107878368	0.137882918	-0.050375719	0.074234294	0.363797596	0.166882665	0.509382376	0.299235334	0.327544626	0.109311053	0.106595981	0.083236755	0.231023197	0.171472842	0.096567751	0.139893045	0.100396827	0.273284626	0.099173186	0.282754303	0.118850678	0.141404323	0.349468919	0.329795061
CPT1B	0.038244533	-0.014805797	0.05847602	0.041860702	0.139404519	0.084657176	0.351407401	0.02477372	0.097342771	0.151033612	-0.039167506	0.218409453	0.090087824	0.063317947	0.095881525	0.06326023	0.193110559	0.059033742	0.062094992	0.124816239	-0.077143907	-0.01354142	0.00681615	-0.028824764	0.033263021	-0.00707677	0.083927004	-0.028067521	0.07577167	0.204802132	-0.031014485	0.096319816	0.287615974	0.058124354	0.051198707	-0.019464708	-0.054991489	-0.049884668	0.04756693	0.245812652	0.070232524	0.105644866	0.047378059	0.017679359	0.097855216	-0.03150194	0.091967578	0.12076972	0.125040653
DLD	0.038299004	0.142773478	0.043260861	0.357758756	0.213157403	0.153045244	0.281313707	0.329003067	0.509768364	0.575111116	0.221722015	0.585686425	0.364650765	-0.000487182	0.264194002	-0.000306533	0.105551291	0.229603063	0.445413593	0.243033012	0.238093364	-0.039394257	0.093813576	-0.037955728	0.02295496	-0.083026972	0.147537347	0.005800694	0.040883739	0.403162858	0.19076818	0.326945475	0.370135469	0.484984314	0.204571267	0.035241451	0.081301225	0.358589901	0.20527044	0.029894817	0.128615565	0.351087867	0.073539214	0.296520823	0.313629693	-0.009785988	0.249985783	0.348588963	0.335498069
ACSBG1	0.038334525	0.068860776	0.063004468	0.072841076	0.039288064	0.023763044	0.092831912	0.038597057	-0.023947506	0.001604818	-0.008809404	0.050227424	0.081678477	0.029613496	0.055719236	1	0.072480871	0.060576144	-0.013660798	0.038227425	0.116567347	-0.013369829	0.292623953	0.005341679	0.033994319	0.108981522	-0.01426179	-0.020791953	0.064171738	0.049467607	0.014667325	0.051014083	0.07063209	0.012507037	0.015257131	-0.009944393	0.008373851	-0.05000891	0.06924332	0.157212962	0.104137765	0.058832027	0.048899577	-0.011309592	-0.026979183	0.032706712	0.042791988	0.11313522	0.045531883
ACADM	0.03903058	0.435414584	0.150276246	1	0.425925179	0.403701042	0.333521269	0.513212091	0.186846168	0.354942116	0.335677673	0.301046803	0.406433414	0.345444076	0.368770644	0.072841076	0.108303153	0.277614983	0.40452077	0.122728216	0.360918776	0.325141902	0.101650757	-0.007721055	0.017478457	0.143483333	0.027515795	-0.00635403	0.11541707	0.305877786	0.187764727	0.466412586	0.078163287	0.405279577	0.063180903	0.118422788	0.069361306	0.255446131	0.049252832	0.083004645	0.025772366	0.081653476	0.356503558	0.018504226	0.342264244	0.311123421	-0.013003187	0.167620534	0.396626481
ALDH1L1.AS2	0.040344983	-0.013000305	0.036551996	0.025772366	0.028709888	0.019192115	0.039384794	-0.009928341	0.141768888	0.010659732	-0.024773923	0.168593726	0.041296337	-0.107965812	0.042417085	0.104137765	0.021749531	0.011110559	0.036545843	0.075759708	-0.046016379	-0.081591044	-0.016431809	0.002809121	0.009133698	-0.023261121	0.074276597	-0.00367474	0.0102163	0.074577347	0.001988757	0.018817364	0.137781075	0.054374033	0.090881133	-0.000445391	0.049359272	0.003342655	0.610042191	0.211286866	1	0.044337268	-0.055945233	0.025297979	-0.013009713	-0.070429948	0.116170436	0.183194704	0.082332501
ACOX1	0.040593643	0.319028777	0.110681388	0.406433414	0.317492818	0.267638185	0.291510716	0.352652807	0.174747168	0.473715422	0.386110452	0.415467916	1	0.267594073	0.419675169	0.081678477	0.103341112	0.399632535	0.526912746	0.205687508	0.322590009	0.301283761	0.104442016	-0.027378782	0.050798625	0.130684447	0.047891583	0.021368384	0.106292357	0.303553539	0.344904083	0.379314163	0.214506736	0.461626841	0.093618935	0.093513049	0.08007316	0.246532731	0.083789538	0.025647035	0.041296337	0.153610366	0.269376271	0.031846695	0.235214136	0.259737806	0.117822493	0.244236742	0.430915813
ACOX3	0.041766238	0.297486187	0.148594112	0.368770644	0.358794748	0.286592262	0.404929754	0.312988084	0.140342197	0.25794352	0.322091946	0.32108181	0.419675169	0.293437223	1	0.055719236	0.102705261	0.352553616	0.394390572	0.131179204	0.200781097	0.287450372	0.014706335	0.037944045	0.034375357	0.142718713	0.101801054	-0.010481919	0.095286485	0.219875417	0.138000014	0.346581256	0.306220976	0.349988392	0.018849169	0.144621335	0.108171742	0.16714656	0.090446983	0.080443855	0.042417085	0.027125002	0.410992884	-0.039873805	0.207260712	0.30012668	0.145983257	0.333232781	0.30070462
SDHC	0.043776847	0.317829496	0.104405548	0.566892434	0.415356937	0.391108702	0.376717905	0.478137739	0.36759707	0.46357063	0.341843571	0.52057081	0.444831179	0.230080433	0.37005676	0.003763271	0.129114196	0.285356681	0.455071182	0.164645608	0.31208105	0.232212821	0.118153026	-0.027810909	-0.007363309	0.029070359	0.030994113	-0.016159555	0.087052207	0.443766076	0.202290751	0.448614177	0.329243993	0.519527467	0.057438674	0.06344779	0.06715712	0.370236406	0.143686282	0.093237623	0.070745933	0.183203221	0.280224929	0.227027189	0.443552437	0.289795392	0.157182941	0.285363944	0.46654911
PAAF1	0.045083674	0.360090008	0.065589918	0.43879276	0.281377008	0.255272943	0.30559882	0.430085267	0.395953817	0.465823131	0.267311012	0.415716122	0.381760662	0.176122967	0.389506088	0.057471688	0.189010873	0.311221938	0.319264351	0.184026877	0.290083852	0.117497454	0.093366118	-0.023883596	-0.016961121	-0.019894655	0.15100398	-0.018476806	0.070439228	0.352682098	0.168083948	0.48341511	0.215716503	0.400412165	0.179793039	0.108174445	0.056095118	0.300861343	0.086498142	0.126037838	0.122528813	0.167614344	0.195898188	0.153570802	0.299103822	0.122629406	0.12338257	0.280993562	0.307856341
IDH3A	0.047918125	0.187769717	0.041650866	0.310663167	0.19454204	0.184723132	0.205452694	0.280438138	0.499554165	0.435949564	0.148337847	0.632553048	0.330656061	-0.054671122	0.167297226	0.160119006	0.109569604	0.28561132	0.340165273	0.221872014	0.276001719	-0.118064686	0.084279323	-0.02985181	0.015048632	-0.051907946	-0.001467983	-0.024118441	-0.005820004	0.556493761	0.190514729	0.342956705	0.404728016	0.406818317	0.135712539	0.017571219	0.20858177	0.311232486	0.281610627	0.058846878	0.134868583	0.312926047	-0.029420442	0.264411883	0.218535768	-0.10253755	0.3018816	0.384123063	0.304449338
CYP4A22.AS1	0.0482425	0.02825661	-0.02434486	0.117235908	0.074717379	0.115107829	0.138086032	0.03339479	0.123823913	0.239065762	0.05835606	0.214382374	0.167734072	0.015546944	0.097946558	0.057285777	0.157770892	0.115057314	0.138163874	0.109579208	0.074455309	-0.062108271	0.005453145	-0.023851713	0.039721838	-0.109042781	0.076972785	-0.007704235	0.03542353	0.239333624	0.081802149	0.219554247	0.141310965	0.14744477	0.152265147	-0.000912593	0.098812082	0.09447636	0.082380155	0.23908603	0.107471423	0.148285665	-0.076396954	-0.018375776	-0.031262467	-0.076941385	0.170099789	0.131725299	0.074254045
PPARGC1B	0.048268208	-0.070305988	0.121150433	0.0744196	-0.014988957	0.052074297	0.087136476	0.002836697	0.36787556	0.294446419	-0.005943457	0.524002892	0.158640374	-0.218817258	0.144260846	0.111298587	0.14154938	0.241920548	0.179285227	0.125310996	0.103816975	-0.226635297	0.017794557	-0.029641587	0.060803434	0.036409605	0.171396645	-0.048541031	0.040098687	0.244156733	0.065883684	0.140777433	0.454243613	0.130802571	0.162786033	0.065178882	0.093476237	0.100168161	0.234237437	0.128375922	0.168366442	0.272314987	-0.068303956	0.228621574	0.093860375	-0.205079808	0.343790669	0.38840988	0.123489614
CYP4A22	0.048963358	0.108555242	0.278248038	0.169747977	0.182052652	0.267279123	0.205482019	0.204713936	0.002121637	-0.034597228	0.051825536	0.107023414	0.141499543	0.130555478	0.249680957	0.044026152	0.121038341	0.086124417	0.109535581	0.066248826	0.04472891	0.158949894	-0.023607604	0.018517526	0.171429302	0.250350721	0.04424388	0.001726863	0.098682976	0.054769332	-0.036100216	0.119496062	0.077152574	0.017537826	0.097061889	0.016908281	-0.0816556	-0.065194083	0.000382981	0.166517676	0.052979161	-0.07235545	0.305404767	-0.024651447	0.158950726	0.246175591	0.007782375	0.062751615	0.22439813
ALDH1A1	0.049621582	0.010759613	0.039107292	0.063180903	-0.009432701	0.057946512	0.001428414	0.057297798	0.194822386	0.116510393	-0.047868002	0.190240515	0.093618935	-0.115657149	0.018849169	0.015257131	0.001104387	0.082255942	0.110254233	0.1103702	-0.018619448	-0.096080009	0.011658673	-0.011161579	0.024834015	-0.031272313	0.35160133	0.015523431	0.063559606	0.065180022	-0.00461826	0.235315978	0.052091599	0.062104835	1	0.028481651	-0.054360383	0.086596408	0.102971601	0.017202921	0.090881133	0.142180831	0.038637063	0.10552251	0.134917002	-0.089706371	0.09735079	0.09730678	0.05619201
ADH1C	0.050043274	-0.003295137	0.014084795	0.027515795	0.030376397	0.04298864	0.005220852	-0.006357267	0.18183511	0.029093504	0.009262837	0.121765457	0.047891583	-0.052956452	0.101801054	-0.01426179	0.007931466	0.055554037	0.051996342	0.074716276	-0.033542008	-0.043561065	-0.03364791	-0.005992586	0.041226058	-0.026105007	1	0.014734027	0.11048844	-0.008099869	-0.046385481	0.120585868	0.048341386	0.052999643	0.35160133	0.115649908	-0.033422231	-0.032387002	0.005485463	-0.014780631	0.074276597	0.014828503	0.100259944	0.071112694	0.099812525	-0.018901934	0.079887865	0.115044514	0.00146853
GCDH	0.051647977	0.254491351	0.079695442	0.290803745	0.247989344	0.270107022	0.319078513	0.263523496	0.515064889	0.408171301	0.142617199	0.482226876	0.292912376	0.070639004	0.314238384	0.213924181	0.211674688	0.243376787	0.215347291	0.197097765	0.19477834	-0.022646456	0.11008024	-0.004965357	0.00383924	-0.009666645	0.07057131	-0.050793844	0.042944365	0.420693255	0.089318094	0.424189161	0.451252243	0.361960117	0.131181798	0.024221856	0.032879227	0.296300686	0.122674156	0.209539999	0.132304324	0.277620167	0.172840496	0.139702664	0.216065582	-0.008149623	0.206545629	0.329019208	0.26798539
NDUFA6	0.052091712	0.21382536	0.053874231	0.271974119	0.288391454	0.163719637	0.239322899	0.254651795	0.524262501	0.305182887	0.127732121	0.651435633	0.344933765	0.030949928	0.196508301	0.020503542	0.077206661	0.203401499	0.252666992	0.215242004	0.180360879	-0.058767053	0.059368947	-0.033321359	0.013536092	-0.064003859	0.118211325	-0.022848666	0.067755219	0.41774371	0.175631906	0.51256591	0.313124941	0.32323319	0.170354819	-0.01102256	0.081005513	0.245445488	0.16578537	0.09014797	0.148111635	0.176702451	0.062925657	0.185650807	0.231411513	-0.012587254	0.262599254	0.346547214	0.224549834
ALDH1A3	0.052765581	0.065713862	-0.037754653	0.069361306	-0.027461394	-0.034063181	0.015784625	-0.029240073	0.061953763	0.10789938	0.073481659	0.124802433	0.08007316	-0.032199462	0.108171742	0.008373851	-0.035496	0.06128721	0.109440644	0.019552988	0.138259563	-0.053024424	-0.022376418	-0.021654798	-0.010853183	0.019313416	-0.033422231	-0.0384733	-0.067262116	0.135843404	0.237734438	0.111466182	0.142464433	0.082029164	-0.054360383	0.044124488	1	0.144998363	0.11245434	-0.0237708	0.049359272	0.088336712	-0.081140367	-0.038918992	-0.088800273	-0.096103331	0.135518135	0.260434328	-0.092335228
ALDH16A1	0.052887152	0.05462319	0.089957698	0.078163287	0.223124277	0.098546456	0.365428529	0.062713394	0.282512399	0.301940943	0.063095486	0.470380031	0.214506736	-0.084890136	0.306220976	0.07063209	0.102877692	0.151135801	0.262498285	0.158230963	0.127434712	-0.115408317	0.05379402	-0.031942532	0.02048574	-0.012931421	0.048341386	-0.014936822	0.052795072	0.350161972	0.073936686	0.348546833	1	0.298609604	0.052091599	-0.02004782	0.142464433	0.155300165	0.229798897	0.1953096	0.137781075	0.19201869	0.112640098	0.147464287	0.14620276	-0.039909238	0.271224911	0.437181503	0.233775545
UQCRFS1	0.053299	0.126986908	-0.014010471	0.185567012	0.115127885	0.107726791	0.117090768	0.16447599	0.512343635	0.344598467	0.125831758	0.387059422	0.207216129	-0.074886642	0.121167379	0.041233821	0.039958159	0.150081304	0.258581934	0.191640236	0.178457753	-0.109086156	0.04009628	-0.026467036	-0.006819767	-0.089691823	0.236345525	-0.008642403	0.031858128	0.304800732	0.089262321	0.240023825	0.297189017	0.266553597	0.171618605	0.052724856	0.083270434	0.183120584	0.207877812	0.107678061	0.218800992	0.236923323	-0.01861988	0.149149317	0.1317381	-0.067582158	0.304029622	0.279880591	0.105446755
ACSL3	0.054725089	0.211317979	0.10552931	0.40452077	0.204065942	0.198460436	0.272994222	0.322489249	0.284841165	0.505415247	0.280754671	0.458169399	0.526912746	0.159359195	0.394390572	-0.013660798	0.025485514	0.255710352	1	0.431885117	0.337221701	0.125689402	0.028017997	-0.029707155	0.020365802	0.040443222	0.051996342	0.031297856	0.040287578	0.283672147	0.191208888	0.272599539	0.262498285	0.474925338	0.110254233	0.169476778	0.109440644	0.206228097	0.119674108	0.031334284	0.036545843	0.148901024	0.192020165	0.121865102	0.323487396	0.319193535	0.14632731	0.246451397	0.31029389
PGM2	0.056648667	-0.041232486	-0.062927323	0.074371823	-0.035812426	-0.004122912	0.029161521	-0.035110006	0.532775372	0.305896655	0.041711791	0.485146718	0.200384381	-0.258481629	0.246064681	-0.018773493	0.043359049	0.084415784	0.257127568	0.179044092	0.116577265	-0.255354776	-0.028240189	-0.040943391	-0.010120411	-0.140615245	0.175872205	-0.032969441	-0.00104207	0.265134809	0.133561165	0.180768293	0.327693445	0.215740336	0.107489312	-0.051595511	0.219037471	0.168539006	0.192102774	-0.001021793	0.149653136	0.212570186	-0.176306264	0.14427904	0.045238921	-0.214175215	0.413680696	0.393523837	0.054160094
ACAT2	0.05791021	0.206254996	-0.041127385	0.186846168	0.028865433	0.092457549	0.071306114	0.142670441	1	0.465715457	0.074653312	0.502363473	0.174747168	-0.173514718	0.140342197	-0.023947506	0.078713194	0.11187022	0.284841165	0.277268629	0.179779751	-0.231850498	0.043620542	-0.022001302	-0.013027046	-0.149707925	0.18183511	-0.010614252	-0.016439593	0.298188439	0.042527634	0.31963354	0.282512399	0.28718414	0.194822386	-0.015246615	0.061953763	0.238488214	0.142033025	-0.013739349	0.141768888	0.195955328	-0.054131651	0.209409386	0.142591234	-0.17630203	0.332149169	0.380321497	0.075772305
EHHADH	0.058979241	0.029996421	0.032527794	0.151337532	0.064919543	0.103413701	0.035116016	0.100591818	0.47009284	0.413171227	0.08260946	0.508000178	0.229042101	-0.15876744	0.086103614	-0.01506376	0.117306922	0.162311293	0.259482735	0.124288225	0.13938873	-0.15831225	0.073725974	-0.028992627	-0.01748453	-0.108407363	0.091999759	-0.020475809	0.017019897	0.339907762	0.138506084	0.214283237	0.326540094	0.277333372	0.193480485	-0.034094789	0.093328663	0.229511814	0.151276518	0.104434301	0.147484706	0.313628638	-0.120384766	0.241671888	0.18795101	-0.155604031	0.247461642	0.300665283	0.172478082
BPGM	0.059363142	0.196581087	0.000549672	0.271372479	0.180331229	0.039467039	0.088899429	0.094890235	0.250424938	0.254589064	0.174272805	0.306422507	0.330180206	0.050211174	0.229499566	0.008924509	0.013154932	0.246821872	0.239495669	0.089535488	0.223952763	0.03814456	0.068584737	-0.032042792	-0.018430619	-0.020782601	0.08139596	-0.045999873	-0.029656594	0.300507613	0.303470805	0.437380988	0.176528777	0.264807554	0.15373244	0.05373889	0.197865917	0.303838386	0.062751284	0.024481961	0.006106176	0.180719857	0.05857215	0.082910641	0.132461725	-0.036327814	0.143965485	0.337795675	0.104029138
PFKFB1	0.060517166	0.106135048	0.084288191	0.14282983	0.082010418	0.132653438	0.263220089	0.117697186	0.305264426	0.27602471	0.012671922	0.356230109	0.204993864	-0.018712118	0.189944613	0.138342247	0.172978003	0.093514973	0.19641626	0.151037768	0.11022046	-0.111109668	0.039365802	-0.020133412	0.051601444	-0.005410764	0.112207341	-0.017482011	0.030669425	0.283508479	0.062403206	0.228189253	0.311661493	0.214117238	0.129169673	-0.03503732	0.069927111	0.088022974	0.070662216	0.246496016	0.144184748	0.125459542	0.025533438	0.058608266	0.112926959	-0.011122579	0.211975163	0.290741683	0.176270543
ALDH3B2	0.060707775	-0.03010156	-0.029103777	-0.013003187	-0.033743168	-0.024090561	0.018196835	-0.027911017	0.332149169	0.192304534	-0.034566676	0.31086202	0.117822493	-0.140863773	0.145983257	0.042791988	-0.010144871	0.048430217	0.14632731	0.082015279	-0.016450093	-0.211652214	-0.050246543	-0.019962586	-0.00776374	-0.112548881	0.079887865	-0.003141572	-0.002661686	0.113009741	0.032479527	0.111009606	0.271224911	0.116516774	0.09735079	0.02551709	0.135518135	0.017177453	0.179704624	0.033406929	0.116170436	0.14494202	-0.085437787	0.111828369	0.007190622	-0.145198157	1	0.329279527	0.017950472
ACADS	0.060991677	0.300318915	0.227118237	0.425925179	1	0.365192753	0.512521656	0.461381553	0.028865433	0.112328209	0.293634954	0.258175992	0.317492818	0.483413609	0.358794748	0.039288064	0.069357501	0.211570675	0.204065942	0.005654744	0.145598074	0.478111664	0.076880527	0.004294556	0.070251946	0.181888454	0.030376397	0.046129311	0.28622947	0.299966896	0.142141211	0.398312295	0.223124277	0.270013151	-0.009432701	0.047048022	-0.027461394	0.139994755	0.109794304	0.154595825	0.028709888	-0.033709462	0.516762308	0.045200445	0.344787433	0.449376387	-0.033743168	0.171139647	0.448789989
IDH3B	0.063567296	0.251158136	0.070120325	0.293713723	0.198370441	0.172260344	0.333905641	0.214552017	0.434161292	0.446465063	0.121744005	0.545710909	0.310192913	-0.010456776	0.354057091	0.108952616	0.140429077	0.161331624	0.359973161	0.326285698	0.156032374	-0.079465368	0.060216082	-0.027790123	-0.016835163	-0.04067674	0.058713766	-0.021547847	0.027834597	0.40726677	0.090599704	0.381441871	0.445565104	0.366206081	0.138703383	0.020776938	0.090600351	0.284052443	0.176734644	0.132099639	0.123048959	0.211098195	0.069623874	0.156604532	0.210762132	-0.040699937	0.25951178	0.413817386	0.245903914
ACSL4	0.064005878	0.303361738	0.110660421	0.360918776	0.145598074	0.180518769	0.147550889	0.227392541	0.179779751	0.283850558	0.384318641	0.203051268	0.322590009	0.24398358	0.200781097	0.116567347	0.056115832	0.283945624	0.337221701	0.074439259	1	0.19338457	0.053715695	-0.034931298	0.015079586	0.129260437	-0.033542008	0.014029325	0.10687402	0.25572723	0.188772865	0.293179037	0.127434712	0.356992395	-0.018619448	0.057155615	0.138259563	0.278100639	-0.005228765	-0.025602263	-0.046016379	0.138029466	0.20887112	0.007107261	0.120523731	0.115957342	-0.016450093	0.070150676	0.203581751
MDH1B	0.066371442	0.204648742	0.160422249	0.138612879	0.052314626	0.077606632	0.081128495	0.069768581	0.042194967	0.02759271	0.015535015	0.082451816	0.061550681	0.023659152	0.117986506	0.426202924	0.059727867	0.06252926	0.039848756	0.024414618	0.04929448	0.028364855	0.072279797	-0.007082955	0.075931176	0.254271946	0.009798151	-0.009085988	0.173480726	0.060380336	0.034609706	0.133775849	0.107294931	0.001654573	0.080153155	0.026449003	0.058411428	0.016705534	0.054249215	0.130559825	0.062357461	-0.010261994	0.132467478	0.013034116	0.031957196	0.126247545	-0.005220965	0.072660887	0.06920317
NDUFB4	0.068129884	0.2478784	-0.023923017	0.31244972	0.267699912	0.169830427	0.214422628	0.217734045	0.555010603	0.290710703	0.108437939	0.473327264	0.273379679	-0.055671999	0.219668066	0.058045872	0.091383481	0.163901237	0.272316794	0.27997209	0.160556026	-0.11782274	0.041086764	-0.02888388	-0.029415575	-0.162293712	0.180831096	-0.007935342	0.034741186	0.403357839	0.088083967	0.533976301	0.357882418	0.322967774	0.225669268	-0.019818287	0.071998351	0.229810137	0.219384843	0.140389903	0.179293849	0.119298408	0.058960913	0.15977927	0.220267314	-0.02704508	0.289250825	0.336533756	0.197809627
ALDH9A1	0.0707474	0.366051816	0.175500933	0.503514991	0.364028759	0.356532647	0.297662648	0.390415756	0.356470776	0.37349826	0.278316727	0.484757767	0.390485483	0.247501949	0.42255386	0.050832487	0.154344917	0.338820925	0.312026283	0.084987807	0.296302739	0.211317556	0.216752791	-0.02682012	0.015134125	0.113539335	0.061228939	-0.031364127	0.125569366	0.357791819	0.117924533	0.393004159	0.337452333	0.391136308	0.049497692	0.109508791	0.014945292	0.277276168	0.111604426	0.103706626	0.100364968	0.129862497	0.373494057	0.11006257	0.329888833	0.16356805	0.161690354	0.279162881	0.409397808
ADH6	0.071236362	0.0955217	0.066439499	0.11541707	0.28622947	0.064150496	0.170216972	0.141462846	-0.016439593	-0.017179734	0.113585633	0.114306611	0.106292357	0.10320894	0.095286485	0.064171738	0.009778254	-0.011579868	0.040287578	-0.010976403	0.10687402	0.260491945	-0.018812522	0.006392045	0.185628284	0.037116667	0.11048844	0.327909752	1	0.026495955	-0.009007215	0.082700808	0.052795072	0.086513731	0.063559606	0.021580164	-0.067262116	0.06653407	0.075200187	0.144431654	0.0102163	0.003062268	0.200452414	0.026394079	0.098261923	0.157972929	-0.002661686	0.006924059	0.106839395
PFKL	0.071710737	0.185835131	0.060679326	0.264312844	0.354763469	0.180915985	0.376110583	0.173682235	0.369926529	0.46814109	0.228218294	0.550749081	0.366250655	0.100580356	0.443320838	0.028187325	0.158357775	0.281920433	0.332346524	0.134943152	0.161657218	0.077649328	0.096941282	-0.034372411	0.013993565	-0.00769097	0.177086143	-0.034796656	0.072344303	0.348645311	0.238132796	0.469552558	0.56150946	0.393516777	0.072359353	0.044359185	0.119809192	0.261465478	0.135017756	0.183068346	0.091742918	0.217123056	0.201017198	0.078082608	0.162962813	0.022622504	0.226557945	0.456406001	0.321522574
PPARA	0.075445266	0.088647901	0.142220976	0.258687977	0.167367482	0.145432926	0.25002654	0.224493493	0.334216277	0.414260361	0.235548418	0.626901665	0.419623521	0.076475354	0.311410616	0.013723277	0.177196922	0.314553429	0.396865673	0.096832057	0.224245848	0.021663854	0.107778182	-0.024008584	0.069438599	0.087430491	0.18871487	-0.018132165	0.117014927	0.307540133	0.303715992	0.299087594	0.307040286	0.394652926	0.16942383	0.12458187	0.106570899	0.23907856	0.174510102	0.125691648	0.110859312	0.264352049	0.12993433	0.142831329	0.27342631	0.026498784	0.264230395	0.323501925	0.326284696
OXCT1.AS1	0.078683412	0.161902014	0.062003762	0.147566254	-0.001387036	0.057395327	0.030965568	0.032575331	0.207006546	0.127453079	0.048680268	0.196906916	0.063214181	-0.048048348	0.095187618	0.161691482	0.109824398	0.078392311	0.071544884	0.142091767	0.078183019	-0.098320323	0.107531233	-0.010633505	-0.006738222	-0.014490584	0.113277101	-0.036003779	-0.034077795	0.12265991	0.021928764	0.117041178	0.12291292	0.091640162	0.080872468	0.050503745	0.080511364	0.046339992	0.051153822	0.143392889	0.181829754	0.052452872	-0.060335651	-0.02983877	-0.056645049	-0.098356061	0.082483366	0.180549038	0.056429264
ACO2	0.084094123	0.143830938	0.144807318	0.301046803	0.258175992	0.225209007	0.290935918	0.270444541	0.502363473	0.501039879	0.214728512	1	0.415467916	-0.012449846	0.32108181	0.050227424	0.083453633	0.309089722	0.458169399	0.195383464	0.203051268	-0.043820433	0.080712621	-0.03276847	0.061805683	0.03282156	0.121765457	0.005518742	0.114306611	0.385781384	0.150583876	0.393062177	0.470380031	0.424983146	0.190240515	0.019165617	0.124802433	0.272656919	0.25232628	0.123682866	0.168593726	0.271129773	0.091373067	0.207672543	0.306326282	0.045403455	0.31086202	0.49522421	0.315537059
OXCT1	0.089599139	0.173061004	0.052137655	0.269877187	0.02914542	0.070070178	0.044680719	0.089475867	0.412362356	0.305126913	0.154784435	0.384362649	0.183145102	-0.079271247	0.283442992	0.052980182	0.080444698	0.171484027	0.189227886	0.18249072	0.156329178	-0.110873027	0.058247185	-0.025036891	-0.019780186	-0.049103206	0.317317981	-0.063191381	-0.025049095	0.250113292	0.096115844	0.258615217	0.225022205	0.201780631	0.14791432	0.133503115	0.122967356	0.158290031	0.100788728	0.100933855	0.19617837	0.172262526	-0.058968578	0.032499511	0.022486982	-0.154789134	0.20959137	0.320522673	0.064094143
ALDH4A1	0.092074626	0.058385381	0.035744249	0.167620534	0.171139647	0.137671763	0.230519533	0.125917148	0.380321497	0.229837311	0.04374959	0.49522421	0.244236742	-0.053066672	0.333232781	0.11313522	0.011741522	0.142621	0.246451397	0.120634603	0.070150676	-0.072732053	-0.004898518	-0.022127234	0.028160903	-0.024081454	0.115044514	-0.029446602	0.006924059	0.193822413	0.132306143	0.339922617	0.437181503	0.201958938	0.09730678	-0.032614866	0.260434328	0.086855683	0.206257648	0.082447784	0.183194704	0.090285374	0.067994522	0.160419969	0.195846166	-0.058232759	0.329279527	1	0.149409547
age	1	0.028042829	0.024585831	0.03903058	0.060991677	0.017370195	0.000403945	-0.031302643	0.05791021	-0.003258226	-0.019999127	0.084094123	0.040593643	-0.007702925	0.041766238	0.038334525	-0.077756906	-0.018970123	0.054725089	0.01661521	0.064005878	-0.014827469	-0.007751818	-0.001726941	0.036584836	0.022963836	0.050043274	0.01609999	0.071236362	0.031933586	-0.000759393	0.03163839	0.052887152	-0.018453973	0.049621582	0.002306854	0.052765581	-0.011686532	0.028855198	-0.000527513	0.040344983	0.016463061	0.023546738	-0.0076442	0.015574164	0.002625906	0.060707775	0.092074626	0.034734341
[truncated: 139 more columns]
