# Supplementary material for: Comprehensive Analysis of Alteration Landscape and Its Clinical Significance of Mitochondrial Energy Metabolism Pathway-Related Genes in Lung Cancers
Source: Oxid Med Cell Longev. 2021 Dec 20;2021:9259297. doi: 10.1155/2021/9259297 (PMC8713050; doi:10.1155/2021/9259297)
Supplement: Supplementary 13 — Supplementary Table 4: correlation analysis between age and MMRGs in the lung control group. [file 9259297.f13.txt]

Supplementary Table 4. Correlation analysis between age and MMRGs in lung control group.
	age	ACAA2	ACADL	ACADM	ACADS	ACADSB	ACADVL	ACAT1	ACAT2	ACLY	ACO1	ACO2	ACOX1	ACOX2	ACOX3	ACSBG1	ACSBG2	ACSL1	ACSL3	ACSL3.AS1	ACSL4	ACSL5	ACSL6	ACSL6.AS1	ADH1A	ADH1B	ADH1C	ADH4	ADH6	ADPGK	AHR	AKR1A1	ALDH16A1	ALDH18A1	ALDH1A1	ALDH1A2	ALDH1A3	ALDH1B1	ALDH1L1	ALDH1L1.AS1	ALDH1L1.AS2	ALDH1L2	ALDH2	ALDH3A1	ALDH3A2	ALDH3B1	ALDH3B2	ALDH4A1	ALDH5A1
PPATP2	NA	NA	NA	NA	NA	NA	NA	NA	NA	NA	NA	NA	NA	NA	NA	NA	NA	NA	NA	NA	NA	NA	NA	NA	NA	NA	NA	NA	NA	NA	NA	NA	NA	NA	NA	NA	NA	NA	NA	NA	NA	NA	NA	NA	NA	NA	NA	NA	NA
age	1	0.076559004	-0.068848706	-0.00196986	0.052825772	0.053012643	0.048790892	0.057308724	0.040045501	0.170730168	0.113306105	0.169586377	0.100333098	0.144505518	0.120607362	0.146939133	0.060580834	-0.092125368	0.069837128	-0.10594681	0.049761757	0.078569837	0.024335302	0.005700359	0.053403709	0.083027602	0.10466618	-0.009397594	0.072762597	-0.032594624	0.078827686	0.014415926	0.04096534	0.162433845	0.056144735	0.145196537	0.156575869	0.200093438	0.078460544	-0.015478195	0.022545431	0.087479663	0.076714626	-0.063659316	0.095049266	0.196107226	0.026116194	0.106617029	0.138172356
ALDH7A1P1	0.215225061	0.237460696	0.27083099	0.276444346	0.275296058	0.242197725	0.351016899	0.236491794	0.172909571	0.332731466	0.275565298	0.346739305	0.354300573	0.370396788	0.350628908	0.197172338	0.239773444	0.178005412	0.338325124	0.235718193	0.197925457	0.293965184	0.237594519	-0.011868766	0.312351712	0.246600325	0.134966413	0.070845359	0.205943203	0.277162345	0.346437198	0.271392956	0.317683548	0.285450462	0.268451344	0.12499997	0.158095719	0.205867272	0.078245924	-0.027916651	0.050766573	0.271689978	0.249272104	0.013915469	0.359011399	0.290108781	0.130438722	0.24114024	0.31219674
PFKP	0.210824714	0.681402124	0.241457018	0.462168122	0.64571112	0.540451509	0.759166814	0.518940179	0.517349771	0.787801675	0.700096271	0.78110905	0.66467829	0.510124649	0.761311877	0.160666174	0.429293195	0.517145316	0.646867338	0.287124952	0.569851648	0.69805175	0.385408692	0.0776616	0.28683194	0.298242019	0.257433452	0.391798843	0.154516632	0.669121701	0.56148951	0.682528916	0.685645972	0.754031707	0.371591485	0.210118591	0.5118331	0.757779584	0.147307394	0.025734124	0.012366082	0.53768047	0.618477323	0.224330609	0.576478613	0.387598771	0.298253	0.641502102	0.439487023
OXCT2P1	0.208280934	0.488627746	0.183429445	0.32462578	0.494952237	0.442470378	0.45225107	0.437177761	0.376378737	0.579763153	0.42479485	0.603249731	0.474391341	0.418081583	0.598004063	-0.084397651	0.353192475	0.304562483	0.408673124	0.232417212	0.292718135	0.489849353	0.344547777	0.015282765	0.380896933	0.412012172	0.104852621	0.389083773	-0.033101878	0.362471102	0.404427083	0.413638869	0.569573291	0.5776772	0.12184367	0.239146935	0.243735905	0.571147336	-0.011145876	-0.126138771	-0.058848351	0.441023053	0.342852289	-0.034615343	0.448218332	0.182080897	0.09325279	0.560619208	0.380670721
PPARGC1A	0.207185732	0.630485149	0.527077501	0.563198541	0.546372423	0.513583886	0.545624121	0.578182294	0.401635723	0.678149383	0.562963358	0.712811978	0.69577243	0.627003776	0.693045672	0.204269807	0.439693722	0.412570131	0.659181044	0.329969353	0.47720997	0.594777614	0.266328748	-0.005870026	0.468593534	0.485863969	0.267493134	0.236419758	0.289916477	0.443495432	0.698928194	0.395071378	0.524353231	0.554467218	0.468627055	0.19828942	0.27596215	0.528427138	0.202107125	0.056823826	0.151028749	0.383850871	0.547835512	-0.021458594	0.706738507	0.574599688	0.162138435	0.534533511	0.569518664
ALDH1B1	0.200093438	0.734019022	0.177012986	0.603810139	0.678058931	0.614484767	0.721979188	0.659422465	0.593985433	0.802343747	0.715303398	0.778573077	0.702149685	0.504629323	0.774969576	0.090533544	0.366049811	0.448964469	0.687000546	0.334093618	0.607875463	0.688411828	0.525304006	0.142822534	0.427749461	0.539659488	0.234015492	0.468071542	0.126287688	0.644823195	0.668879275	0.714487109	0.710368052	0.862925878	0.405884892	0.285400206	0.578107113	1	0.225065923	-0.031729522	0.133937545	0.716684915	0.543539716	0.051539555	0.623641701	0.362620248	0.305044415	0.758536538	0.486767241
ALDH7A1P4	0.199007867	0.047655863	0.003481507	0.092658895	-0.009933172	0.001790757	0.033580545	0.063523941	-0.058652068	-0.007580056	0.108475008	-0.010330602	0.099934669	0.070648972	0.022729597	-0.05741111	0.227685177	-0.051756536	0.007971093	-0.035671671	-0.05748615	-0.018902056	0.076741849	-0.027152935	-0.070443683	0.014860835	0.000512945	-0.095394541	-0.042611938	0.066803322	-0.012056815	0.044096521	-0.021380165	-0.027300213	-0.027952848	0.251611873	0.244278427	0.030523381	0.003284975	0.016665556	0.036518149	-0.02605184	0.106399159	0.130611357	0.068775045	0.018635774	-0.01673931	0.008371975	0.053648895
ALDH3B1	0.196107226	0.549513523	0.478070585	0.602997742	0.609505854	0.487352923	0.51121034	0.622436957	0.337926196	0.540156059	0.518671189	0.613941073	0.614587881	0.504873746	0.639462664	0.682555094	0.366515192	0.372231468	0.616129271	0.26788957	0.243813709	0.490607329	0.222738494	0.062885752	0.337134071	0.403998281	0.714818794	0.186355008	0.710023856	0.481285153	0.471845708	0.438114863	0.537136657	0.43643632	0.800427854	0.107913415	0.173330136	0.362620248	0.660927281	0.215914008	0.505098059	0.190908944	0.679220206	0.252908845	0.712238627	1	0.434381877	0.515602907	0.654514121
OGDH	0.183962148	0.80133858	0.476155561	0.619634555	0.801801109	0.677335974	0.790729067	0.755172923	0.595672628	0.950004436	0.82399039	0.971489752	0.903294705	0.771748446	0.931735418	0.074735909	0.438384878	0.640877918	0.831925559	0.373724784	0.640587005	0.864168072	0.477514962	0.052813711	0.593964785	0.615554282	0.274683532	0.439548176	0.18122509	0.688465021	0.757678401	0.714294806	0.835660826	0.844861735	0.551999382	0.299115094	0.398553722	0.767259001	0.244717808	-0.043356206	0.149521747	0.641447946	0.756562995	0.076034248	0.793080939	0.570715565	0.386806859	0.874632205	0.731429638
CPT1A	0.177071129	0.693947526	0.501110894	0.679466524	0.676374776	0.549038877	0.726961806	0.669355299	0.382832374	0.81178616	0.700120062	0.800335654	0.843701641	0.804616769	0.823193653	0.254539435	0.498969154	0.464008306	0.800149845	0.322901225	0.523121325	0.7434072	0.539505595	0.104692165	0.557134991	0.619545472	0.372311624	0.344101978	0.34484028	0.633518704	0.766583407	0.581141946	0.691600523	0.752889571	0.629196036	0.207706512	0.409970277	0.658437601	0.338348689	0.061058722	0.247348079	0.620427734	0.671163562	0.059555234	0.799824756	0.604871864	0.332374791	0.686489767	0.719626046
ACLY	0.170730168	0.807237173	0.436338711	0.696122406	0.762783834	0.721668865	0.800948328	0.763475651	0.671598187	1	0.880424568	0.963993483	0.907281835	0.733844721	0.94011673	0.132953691	0.437338303	0.628034655	0.863661635	0.363808427	0.625468152	0.868886807	0.571076549	0.087044057	0.590415959	0.646876958	0.311430429	0.478577531	0.208747793	0.738025249	0.74309118	0.768754791	0.80743839	0.902269709	0.576702536	0.368023535	0.426097085	0.802343747	0.262762426	-0.016067965	0.155908704	0.729485184	0.740047426	0.097710349	0.798451996	0.540156059	0.398852473	0.835753984	0.743794565
CYP2U1	0.170717152	0.685249108	0.352979898	0.785408158	0.604866141	0.585803269	0.551551326	0.773824961	0.410595172	0.754206168	0.690640735	0.718907747	0.775144328	0.71316137	0.758681861	0.302348361	0.45145051	0.323799297	0.757123748	0.271555878	0.396381017	0.617075972	0.632206329	0.070774645	0.61248056	0.840887981	0.414093853	0.432251188	0.406014334	0.551425105	0.645159535	0.572522369	0.590359464	0.702772962	0.671210031	0.338815071	0.367754158	0.65203335	0.420431099	0.098637058	0.367050028	0.608361968	0.602181015	-0.020007716	0.743889549	0.600372289	0.243449673	0.629635372	0.690917233
ACO2	0.169586377	0.83938424	0.4732136	0.686126531	0.832006268	0.703465681	0.848254894	0.777668738	0.656436193	0.963993483	0.878802018	1	0.912829541	0.750854475	0.957570835	0.18074296	0.480325564	0.669393154	0.841487299	0.381163961	0.624303222	0.865241148	0.517699014	0.047143859	0.591188445	0.611902783	0.36307759	0.459986074	0.273300152	0.766076231	0.743958287	0.791208016	0.870708452	0.872570702	0.619323116	0.311574625	0.404211662	0.778573077	0.326607376	-0.00475933	0.203838006	0.676705329	0.787079902	0.129803905	0.803073819	0.613941073	0.458069545	0.873335322	0.744671641
ALDH7A1P3	0.168101932	0.146128478	0.123365746	0.024441842	0.219288615	0.036289655	0.119975376	0.168849201	0.086481238	0.077324443	0.044150645	0.109556815	0.095739308	0.215087858	0.116500476	-0.035379205	-0.020824374	0.080391816	0.09495859	0.003080908	0.124993538	0.205638391	0.101543378	-0.037016706	0.014466608	0.090394163	0.01990609	-0.062968573	0.020628288	0.058896681	0.057394581	0.07924753	0.116261333	0.031444065	0.099642515	-0.071868746	0.043518146	0.028499888	0.041130291	0.005355336	-0.030039494	-0.066293373	0.170034713	-0.032083912	0.107958547	0.168524421	0.17359537	0.209386099	0.179351289
MDH1P2	0.166510217	0.10180891	-0.052093029	0.126511571	-0.01671218	0.056365447	0.055807884	0.103036426	-0.031001582	0.01094191	0.191605946	0.013078283	0.131322838	0.160821109	0.078851996	-0.065773195	0.382832945	-0.025792405	0.033453125	-0.010909475	-0.004261271	0.020066288	0.028599899	-0.015528156	-0.082372063	0.073639785	-0.014296968	-0.050766023	-0.026331083	0.052651148	0.028986898	0.075507825	-0.053970306	0.069134917	-0.009049359	0.494686485	0.483322131	0.075544698	0.01734096	-0.041458364	-0.02599536	0.039546605	0.031773678	-0.041596648	0.077925057	0.002158568	-0.040482497	-0.006215106	0.058046961
PFKP.DT	0.164743493	0.533241421	0.43584941	0.521240703	0.552011182	0.453004725	0.62479282	0.471328497	0.393187874	0.517796487	0.471332324	0.546045966	0.561732286	0.494158124	0.595371327	0.349539204	0.551210207	0.350236455	0.53600994	0.413599126	0.356399669	0.471137696	0.316199973	0.017033307	0.257317768	0.257121262	0.366139907	0.27030181	0.338144001	0.571067421	0.531029904	0.477559485	0.521431456	0.513431492	0.462358819	0.108179624	0.285679104	0.460249181	0.242661475	0.166335719	0.09204505	0.280351838	0.503863934	0.197579321	0.583352499	0.503684038	0.265797735	0.44658306	0.484561108
ALDH18A1	0.162433845	0.731178829	0.297868728	0.64714168	0.721800458	0.652042735	0.800559553	0.665550176	0.583282415	0.902269709	0.850106678	0.872570702	0.817845481	0.707300218	0.87638174	0.161407086	0.440133729	0.509554959	0.750265593	0.350107136	0.604664487	0.789526332	0.594345733	0.143260755	0.478255241	0.570278709	0.311352206	0.511940142	0.235669045	0.704553377	0.639874447	0.792455145	0.799044529	1	0.50294346	0.399520336	0.545200817	0.862925878	0.235872344	-0.009037127	0.101820944	0.816687613	0.597234622	0.061382523	0.699360416	0.43643632	0.478814324	0.84056758	0.665365348
OXCT1	0.16138005	0.809152085	0.42007314	0.825724104	0.701350894	0.726547109	0.696183818	0.801749707	0.6255434	0.869781841	0.780001413	0.820798253	0.832862069	0.7437624	0.85672614	0.148233167	0.381440533	0.498755279	0.802379573	0.329762456	0.619435935	0.786344296	0.700596201	0.204623669	0.547561568	0.720345882	0.342427263	0.437374686	0.250762996	0.719940976	0.728374032	0.767796404	0.667031997	0.852331413	0.615471587	0.3784947	0.408551256	0.786152021	0.286638384	0.032055388	0.193923464	0.711127084	0.609247225	0.02036047	0.809268568	0.462550146	0.392417075	0.781853507	0.725748196
PPAN.P2RY11	0.160798608	0.313015942	0.172343792	0.219956667	0.385732383	0.298250539	0.337973474	0.278945664	0.19046282	0.301551166	0.243911229	0.335586262	0.317774314	0.214936384	0.319888777	0.149211034	0.228284415	0.190099722	0.275906697	0.152061069	0.236795668	0.311859855	0.213621519	0.038461627	0.121625829	0.103956245	0.119053454	0.066609167	0.065292871	0.308738905	0.295830618	0.282920424	0.361485269	0.256623253	0.211856602	-0.003668186	0.090492482	0.297695788	0.167479066	-0.015116062	0.115777668	0.0671657	0.346795221	0.04372671	0.283793774	0.369123509	0.114992959	0.335470454	0.293189518
ALDH1A3	0.156575869	0.398211254	0.026137022	0.298186764	0.283312051	0.282618492	0.526077464	0.277106479	0.254619466	0.426097085	0.51370303	0.404211662	0.424129734	0.324311822	0.434361672	0.050507723	0.38332763	0.336815207	0.435000938	0.303414075	0.481448486	0.410373763	0.252986686	0.107149203	0.131377988	0.2195202	0.136913851	0.260959827	0.087022818	0.41550304	0.36477084	0.380269685	0.307274376	0.545200817	0.213519678	0.471361695	1	0.578107113	0.116223725	0.043423604	0.013433371	0.446227643	0.300131169	0.111746076	0.343198961	0.173330136	0.141387176	0.325125395	0.193088843
OXCT2	0.149604767	0.568741107	0.353176453	0.409449299	0.60554175	0.451122392	0.537783886	0.532470486	0.361725524	0.595783439	0.402202319	0.647182773	0.566096851	0.581667455	0.636816424	-0.021068919	0.544080197	0.314094022	0.493859662	0.350830943	0.331113727	0.53350315	0.316930843	-0.031384341	0.378330598	0.38099382	0.119789238	0.300756017	0.067437413	0.461496616	0.585774041	0.462405312	0.635858316	0.553708061	0.208830732	0.098959176	0.199924901	0.575217512	0.042416925	-0.089023289	-0.03268451	0.375852981	0.487953779	-0.023709761	0.551533406	0.289992297	0.128849334	0.584967004	0.497836792
MDH1B	0.149292702	0.133184754	0.104860629	0.38154387	0.200354048	0.096163613	0.204517153	0.217672231	0.038820183	0.146840292	0.138570231	0.191273518	0.170949077	0.143391409	0.238927941	0.960053886	0.146623395	-0.009047383	0.246311904	0.151322407	-0.049998903	0.054154255	0.105609418	0.088405852	0.14974254	0.141395834	0.808283194	0.108980142	0.878716216	0.190403095	0.113336696	0.158970184	0.16558493	0.170479544	0.659252262	-0.068346745	0.073188696	0.119604553	0.659025403	0.439446089	0.512234493	0.08767729	0.207277366	0.291384902	0.298909296	0.711918209	0.350008986	0.099791527	0.256322155
ACSBG1	0.146939133	0.084893322	0.099858252	0.329458278	0.161527388	0.070474369	0.175642143	0.164887784	0.012914401	0.132953691	0.122763992	0.18074296	0.144693702	0.101507762	0.214132119	1	0.179489431	-0.00513972	0.22527521	0.137425834	-0.079576939	0.034529161	0.089249927	0.143863589	0.125125279	0.089031691	0.728011983	0.063335497	0.853843042	0.145460268	0.084636371	0.116549117	0.163801144	0.161407086	0.601066197	-0.070647784	0.050507723	0.090533544	0.63815271	0.39590653	0.51594788	0.081935976	0.172059561	0.230313276	0.250693244	0.682555094	0.349120946	0.074352592	0.227469161
SDHA	0.14615611	0.868121902	0.494919099	0.772874254	0.86864452	0.740590908	0.844232585	0.845250154	0.648690819	0.943159477	0.847240168	0.962442251	0.918713114	0.789808001	0.966770206	0.224841393	0.533850952	0.612166685	0.863770502	0.402781346	0.578629231	0.850379368	0.594700137	0.096492595	0.594914613	0.682577651	0.430906782	0.48563149	0.33119129	0.78867545	0.760131274	0.810419629	0.870146663	0.856551456	0.684387324	0.328119845	0.394226016	0.781426942	0.382778756	0.042323785	0.249705282	0.657357761	0.814877981	0.156664948	0.856169832	0.672063415	0.480655612	0.877554278	0.802116341
BPGM	0.146008562	0.625164843	0.392814995	0.594526362	0.567262301	0.495793116	0.623038039	0.583449905	0.531013973	0.578400578	0.501554087	0.598144546	0.621108505	0.491758218	0.63153304	0.195769159	0.299928739	0.512549486	0.69601886	0.358947796	0.773105567	0.692981064	0.415805495	0.074362621	0.327707528	0.419803681	0.331847125	0.275568942	0.312891877	0.616702807	0.695821688	0.540993261	0.476197986	0.544258074	0.526296511	0.156416404	0.423876785	0.626472908	0.259245741	0.057511613	0.129554866	0.344410179	0.518841892	0.192206986	0.648443524	0.471839381	0.311436931	0.52569403	0.497701969
ALDH1A2	0.145196537	0.350069165	0.156270447	0.35657542	0.189540919	0.434434459	0.268012959	0.375137423	0.463364808	0.368023535	0.458263334	0.311574625	0.37863919	0.261407742	0.37231384	-0.070647784	0.318503926	0.32291596	0.342866677	0.245167	0.332424284	0.416013719	0.283416136	0.017012387	0.250098687	0.406568817	0.12166471	0.3790839	-0.034005097	0.319854747	0.258574705	0.358971256	0.1921315	0.399520336	0.237524403	1	0.471361695	0.285400206	0.058932083	-0.080386481	-0.031549691	0.303274512	0.246084575	-0.006140474	0.278505778	0.107913415	0.206588735	0.328687166	0.386139195
PFKM	0.144835658	0.799201206	0.460910047	0.718318749	0.786833884	0.667535623	0.767411677	0.782687846	0.559865492	0.932694894	0.813918307	0.929695273	0.891731818	0.849558178	0.940201576	0.172070819	0.517499	0.525948883	0.817460664	0.38533995	0.539993131	0.817788807	0.523829554	0.068639503	0.613031016	0.713142892	0.343606827	0.442718051	0.261737327	0.658506104	0.733682615	0.707906566	0.810427945	0.871545081	0.591613816	0.365193629	0.412894995	0.758110376	0.29366463	0.002292221	0.203997425	0.692155211	0.694011191	0.031764615	0.81585909	0.582920647	0.360957186	0.835978652	0.772737995
ACOX2	0.144505518	0.678747674	0.502539873	0.62445932	0.719703861	0.492485762	0.680046153	0.67157419	0.356261836	0.733844721	0.674761915	0.750854475	0.785368603	1	0.796373882	0.101507762	0.471801904	0.3669676	0.647990621	0.328719792	0.453483317	0.682791413	0.421430272	0.042934698	0.491398149	0.60117444	0.306781047	0.319453718	0.254907086	0.587868349	0.627777668	0.618739618	0.685604795	0.707300218	0.544450439	0.261407742	0.324311822	0.504629323	0.243682061	-0.022136055	0.187323013	0.554963441	0.621581991	0.021852562	0.766751483	0.504873746	0.324817763	0.692002797	0.719546595
PPARA	0.14381282	0.714025013	0.580347603	0.715922086	0.671864812	0.707506722	0.746778249	0.733663271	0.50847257	0.898871451	0.7784587	0.883737772	0.923571163	0.789790564	0.885446615	0.214169491	0.579821989	0.597417939	0.86391293	0.450780235	0.553705287	0.835926831	0.587119061	0.058538774	0.604656886	0.667754379	0.34115213	0.409930912	0.305220925	0.685730153	0.780872003	0.649824077	0.720290625	0.815650585	0.646727376	0.374090251	0.379677073	0.670617956	0.308828132	0.035664767	0.22683949	0.687237514	0.713294789	0.017356379	0.817088313	0.602187999	0.42644552	0.763356482	0.843177097
ECI2	0.138469317	0.849157804	0.501589842	0.877418812	0.79941884	0.7257804	0.728188564	0.895163595	0.643557836	0.759949697	0.723448696	0.782969269	0.819441497	0.722739243	0.852207086	0.410913556	0.451638401	0.49570687	0.781752523	0.436649443	0.499590498	0.740616519	0.566388504	0.102517125	0.545571771	0.712875023	0.600897008	0.405895194	0.477745468	0.753767692	0.708109613	0.759332886	0.689999206	0.716205014	0.817503446	0.322818278	0.329545243	0.663388594	0.491955413	0.147292316	0.347987694	0.483636199	0.73066348	0.204024283	0.868437016	0.757532593	0.451866607	0.73521938	0.779685207
ALDH5A1	0.138172356	0.689559838	0.595774048	0.748553564	0.679270697	0.718545128	0.630668832	0.781177189	0.573123865	0.743794565	0.665092452	0.744671641	0.81035888	0.719546595	0.798674775	0.227469161	0.530041132	0.556754524	0.777568538	0.413002741	0.466884405	0.791062446	0.560252194	0.02219377	0.435690319	0.559431146	0.436210153	0.290166912	0.353937631	0.651527111	0.655491818	0.632822984	0.643297292	0.665365348	0.673227313	0.386139195	0.193088843	0.486767241	0.388428513	0.032446724	0.227564122	0.424486499	0.691753936	0.119503799	0.814571187	0.654514121	0.550345456	0.740192282	1
PFKFB3	0.129995525	0.565003685	0.459720235	0.356374818	0.527895785	0.459487323	0.675677283	0.433456597	0.346295969	0.578390984	0.504987953	0.657889646	0.618112207	0.541097972	0.623492217	0.016593153	0.388545052	0.572877967	0.616065797	0.327066385	0.617476766	0.658643534	0.227309258	0.00771851	0.248423136	0.266075213	0.122421006	0.1861431	0.080058887	0.547409022	0.714110057	0.429718969	0.563094569	0.471542154	0.342229824	0.103228772	0.363546358	0.492207671	0.069498029	-0.11451471	-0.005934033	0.319808087	0.592709908	0.056900738	0.570776054	0.382232131	0.159490959	0.486489884	0.409455287
COX10	0.128707159	0.853739075	0.450146096	0.745152419	0.831248235	0.800262824	0.854433288	0.809086827	0.64687103	0.941614947	0.873524149	0.940801359	0.918614402	0.741327347	0.95162259	0.169075217	0.511095036	0.653381993	0.846985585	0.425960704	0.594882687	0.865369905	0.623047474	0.16821023	0.542601833	0.627823947	0.355605219	0.498218296	0.249996351	0.819549587	0.731666809	0.853046979	0.856085148	0.919762674	0.630398208	0.377714738	0.458203023	0.810486322	0.320759771	-0.010959711	0.188861226	0.701880543	0.772676942	0.139861267	0.828695773	0.590380493	0.501091341	0.882618602	0.762533738
GAPDHS	0.127650287	0.239317141	0.254657968	0.282718807	0.26423619	0.246411277	0.22033379	0.292586983	0.091605617	0.237259641	0.1781577	0.268741724	0.296560624	0.303863154	0.306279736	0.116747778	0.647309839	0.059182029	0.20322759	0.263085901	-0.001146391	0.199845912	0.203563416	-0.011699998	0.114121883	0.170278142	0.0652791	0.049387892	0.096162524	0.212751138	0.278651187	0.169517865	0.285272693	0.253574007	0.0747151	0.191261201	0.214903451	0.274198891	0.065114048	-0.038017397	0.008116903	0.137089739	0.256721203	-0.085834392	0.308339323	0.251651211	0.007055252	0.23924838	0.384075641
CPT1C	0.126545025	0.586309768	0.23430714	0.507786544	0.62972184	0.423774826	0.665462338	0.547008232	0.381329263	0.777124186	0.631977663	0.732728365	0.665165108	0.753972203	0.756672652	0.087774434	0.442594531	0.290110247	0.570757008	0.327032213	0.38408401	0.619593566	0.462698682	0.029597398	0.505288821	0.544657824	0.20096757	0.389963358	0.135444055	0.530854573	0.526410278	0.600698256	0.690702376	0.808046556	0.326670837	0.233973152	0.446550565	0.695520558	0.137990043	-0.004002742	0.103897578	0.704822682	0.444932597	-0.024495315	0.581233047	0.281934327	0.221949635	0.662342643	0.511108994
NDUFS2	0.125115291	0.898565345	0.48756548	0.753058403	0.863736535	0.778546955	0.908224854	0.826297506	0.707264249	0.921176142	0.860405172	0.948972197	0.911780557	0.748362491	0.961463927	0.161424657	0.551150362	0.684612739	0.841738533	0.444124071	0.655035464	0.890335417	0.57198554	0.116134475	0.498012156	0.575755867	0.36989834	0.445243878	0.255435129	0.85974302	0.779671813	0.867221529	0.860710461	0.868946449	0.617622345	0.362559939	0.487059941	0.809978173	0.310997113	0.002313518	0.155793321	0.629819287	0.806369183	0.184084758	0.842837368	0.594252961	0.493424898	0.876878664	0.757860833
EHHADH	0.122429679	0.733728561	0.516233186	0.791937262	0.690827791	0.685330982	0.639501281	0.793700572	0.559378964	0.847680289	0.792843371	0.805688656	0.870650339	0.795006561	0.851539675	0.228609252	0.407450532	0.481717491	0.802723475	0.327173044	0.495290046	0.780138764	0.577623278	0.111626508	0.560946901	0.742854713	0.415360253	0.387698645	0.351969549	0.638679816	0.663950443	0.697360188	0.667774442	0.801636521	0.688026556	0.397032819	0.301049128	0.642677494	0.348839367	0.013772908	0.270671051	0.652462727	0.675280654	0.021776023	0.838222122	0.610954089	0.439558297	0.760539408	0.843231551
GAPDH	0.121152216	0.813303448	0.204412121	0.63176659	0.745946455	0.679566714	0.808833545	0.67470399	0.692990342	0.839124734	0.814269709	0.838416371	0.738357013	0.582059323	0.824674675	0.033799379	0.355640745	0.557337667	0.667431609	0.288303182	0.610982708	0.764139419	0.569859795	0.208349473	0.396751973	0.505045441	0.225878458	0.452498119	0.098940832	0.758873859	0.593060414	0.883186946	0.78564163	0.873475839	0.420679292	0.380514296	0.4872988	0.834255675	0.153870902	-0.062546585	0.021792326	0.709669952	0.577423829	0.13056141	0.636350873	0.318555072	0.47372688	0.813637246	0.524938764
ACOX3	0.120607362	0.867915909	0.491580443	0.771230806	0.853769026	0.759322335	0.857121898	0.834045629	0.67216695	0.94011673	0.866028299	0.957570835	0.924436291	0.796373882	1	0.214132119	0.511686041	0.666381803	0.867622741	0.434589464	0.61929684	0.875710333	0.5782722	0.090931578	0.557715207	0.633713339	0.423384067	0.462892097	0.319451747	0.802785395	0.77161613	0.819587019	0.855268112	0.87638174	0.673537041	0.37231384	0.434361672	0.774969576	0.377548101	0.012479165	0.223380799	0.648658573	0.78137272	0.178459204	0.863042845	0.639462664	0.478415062	0.871757617	0.798674775
NDUFS1	0.120292573	0.852057709	0.569939313	0.813723073	0.774493583	0.786053659	0.795945548	0.84875856	0.66267917	0.947676465	0.843527435	0.935496778	0.959344368	0.7580433	0.942471915	0.204097124	0.510393367	0.668468493	0.921744992	0.469839499	0.645862464	0.886814664	0.597533254	0.092600375	0.618415941	0.708074617	0.382071861	0.456729113	0.305074735	0.776324137	0.843473835	0.757240271	0.770207015	0.849190987	0.68131113	0.355171294	0.398455401	0.775216248	0.327555593	0.008041163	0.218516244	0.663188836	0.768293824	0.106064513	0.888695383	0.625183092	0.418776488	0.816508555	0.81937946
MDH1P1	0.118788212	0.059144712	0.26612088	0.121943448	-0.043415302	0.260850236	0.096249403	0.145574721	0.145281982	0.131374032	0.077080877	0.078405233	0.106063891	0.100600445	0.098547258	-0.027354901	0.073754742	0.150373376	0.140364871	0.09342467	0.008466778	0.150363617	0.043744483	-0.043462035	-0.001290318	0.07542278	-0.090690623	-0.053737871	-0.086147596	0.07314937	0.125338689	0.072130807	-0.068863398	0.120945846	-0.017060313	0.057341075	-0.075923434	0.039876701	-0.010686418	-0.11603856	0.02443463	0.0439196	0.056252544	-0.105172797	0.09020908	0.016133791	-0.048882164	0.047304444	0.149682222
GPI	0.118783291	0.820244715	0.304326834	0.626065363	0.814007115	0.689162276	0.87389529	0.709170592	0.634122595	0.906850748	0.905149406	0.922955459	0.858598247	0.686699965	0.904953731	0.079773427	0.4815635	0.611918725	0.738008232	0.350599512	0.588121924	0.816579998	0.529252351	0.07818273	0.458395013	0.512768528	0.286132275	0.478342932	0.161643042	0.796076272	0.644754056	0.882306549	0.878719746	0.915742644	0.511557844	0.38895772	0.500553929	0.812239953	0.211178894	-0.043875978	0.077765077	0.73702359	0.72639827	0.184127696	0.709150314	0.466373873	0.516587644	0.8770238	0.658574025
DLST	0.118210553	0.92995696	0.537373835	0.794779469	0.861795019	0.802766205	0.867959033	0.882449793	0.739955995	0.909534114	0.832438541	0.933848468	0.922671887	0.738277474	0.945796056	0.130147622	0.520731024	0.710932374	0.872491189	0.493409279	0.682470276	0.886720882	0.586569526	0.088396752	0.551521491	0.642662215	0.361678941	0.449202283	0.236159779	0.862605778	0.838979425	0.844355759	0.826900564	0.823968139	0.649327697	0.34803247	0.433918727	0.796759872	0.315669041	-0.032091285	0.177932478	0.587546295	0.812661596	0.181724571	0.869517975	0.592219068	0.437603516	0.851639714	0.757538586
GALM	0.118073857	0.727039908	0.460315198	0.690726563	0.756117693	0.628105045	0.670493524	0.719004015	0.432388295	0.73631003	0.675265077	0.769593753	0.767330534	0.748718516	0.797140035	0.246856617	0.543803841	0.36839962	0.684656985	0.337860964	0.393701874	0.640669062	0.509945053	0.138951016	0.500420625	0.605289051	0.41140358	0.438537889	0.337003613	0.600912534	0.61745139	0.638298295	0.735067393	0.707839436	0.60132617	0.262151432	0.280442706	0.61963484	0.310871352	0.127844505	0.214419789	0.552354989	0.666845898	0.028045326	0.78175488	0.651952527	0.420727653	0.757967782	0.752785926
DLAT	0.117249094	0.871233752	0.488085091	0.888350031	0.771782186	0.798444217	0.760374872	0.877333079	0.730057946	0.89687458	0.849262542	0.870869335	0.8793787	0.674870323	0.897134817	0.306166782	0.394861528	0.614343671	0.88242718	0.374888	0.606589722	0.820807952	0.619050855	0.146232163	0.542873067	0.70679183	0.489082365	0.430455582	0.40794274	0.790011056	0.738114731	0.807668748	0.720553279	0.831300207	0.7396814	0.345691954	0.391900263	0.768076703	0.427012902	0.082618133	0.298653421	0.613501956	0.733274123	0.148431672	0.881971864	0.668275919	0.448604061	0.780074066	0.770045094
ACO1	0.113306105	0.817114002	0.390431413	0.696457875	0.746300319	0.660178708	0.800770876	0.731789201	0.633835157	0.880424568	1	0.878802018	0.880803508	0.674761915	0.866028299	0.122763992	0.444401016	0.60580666	0.763215877	0.294555027	0.605347703	0.787013485	0.510550256	0.028036832	0.482113516	0.593410165	0.308525347	0.446951536	0.214811978	0.773651968	0.653690221	0.809568358	0.755646762	0.850106678	0.581958343	0.458263334	0.51370303	0.715303398	0.267991744	-0.018039131	0.150435331	0.670467009	0.7841042	0.113613619	0.762774517	0.518671189	0.406349534	0.748215421	0.665092452
CS	0.110964986	0.868034903	0.498196375	0.725101562	0.814048552	0.766847218	0.86124521	0.81448063	0.693842124	0.960361226	0.905288199	0.966486445	0.946211636	0.75004726	0.95674184	0.083629884	0.495074996	0.716232101	0.869472019	0.425775428	0.66896666	0.912805975	0.575568543	0.053044053	0.55551118	0.629939337	0.318572273	0.473629121	0.198529009	0.820342742	0.772691998	0.828592411	0.839631534	0.886540694	0.603104146	0.387231426	0.451643954	0.787603774	0.285713362	-0.036888051	0.156138521	0.675946098	0.800872248	0.146623745	0.828300137	0.554128081	0.470025496	0.872834932	0.777031034
HADHA	0.109027535	0.897134369	0.505463658	0.78736564	0.828918377	0.763955402	0.836588465	0.866921889	0.678407427	0.934455093	0.885338566	0.938786815	0.94465826	0.79067241	0.94374433	0.099536959	0.477582872	0.673718322	0.867352568	0.428730715	0.664446213	0.880259521	0.601569715	0.085124897	0.609897216	0.712209659	0.374199801	0.520174996	0.24531162	0.83147865	0.786699633	0.846433697	0.809268605	0.870861039	0.673298302	0.384228226	0.44008162	0.784126967	0.339489696	-0.0157776	0.2244459	0.685438424	0.805512694	0.159796208	0.857478024	0.563294781	0.452161309	0.867401411	0.772554405
MDH2	0.10832488	0.918958482	0.411571382	0.762558995	0.885888783	0.769017086	0.827576246	0.874908176	0.770004904	0.909342738	0.868340177	0.930794652	0.862671669	0.68718283	0.932681363	0.132554221	0.423367275	0.641002536	0.78812137	0.388761332	0.603721244	0.84940869	0.562511832	0.085358351	0.527085743	0.641032311	0.386372659	0.485733939	0.223712431	0.820200161	0.682911402	0.896532604	0.85147731	0.862634943	0.61340978	0.364415403	0.400843641	0.819799004	0.324667885	-0.010267376	0.185286751	0.613086667	0.779613386	0.178724415	0.798974635	0.569919102	0.474259403	0.896607651	0.717880178
PPARGC1B	0.107779261	0.596212852	0.381962534	0.544270671	0.547874157	0.61992155	0.614398406	0.566631202	0.518538837	0.701360448	0.635389301	0.668964894	0.719440697	0.536633045	0.695213006	0.049991096	0.492895504	0.472615147	0.607680514	0.379167866	0.377110511	0.634302906	0.418395094	0.079546682	0.398152615	0.391773503	0.185964783	0.230587961	0.078500442	0.618857093	0.630229669	0.575427971	0.562578832	0.57797506	0.371178074	0.323708568	0.29760369	0.504511786	0.144060121	-0.093300868	0.045088088	0.442924611	0.53860434	0.12699352	0.67184151	0.371750419	0.288239761	0.539706837	0.600176533
ALDH7A1	0.106837854	0.811222201	0.566812899	0.798132103	0.788740052	0.708298872	0.709797913	0.849140712	0.57572433	0.827618555	0.705300143	0.837699559	0.86809298	0.833803997	0.882983736	0.218235695	0.494612988	0.529324276	0.813614812	0.484748013	0.550398441	0.801939393	0.54009963	0.12856738	0.611021196	0.745212872	0.424256801	0.406456053	0.326420368	0.680804985	0.76563349	0.713092398	0.741049995	0.771871707	0.699389819	0.310556757	0.286875085	0.687567458	0.37106106	-0.013593315	0.280458397	0.562573653	0.688392834	0.066350017	0.855471745	0.622477227	0.39989373	0.819647421	0.809295511
PPARD	0.106649765	0.735714569	0.417620524	0.504715935	0.730826163	0.610921003	0.888325591	0.592470484	0.537233835	0.764883468	0.723283851	0.824310271	0.786708935	0.587803738	0.795572139	0.049470912	0.552783434	0.69735607	0.719265375	0.448499394	0.67373411	0.787800865	0.443760753	0.029784094	0.361708291	0.322205576	0.216042709	0.351834962	0.127487158	0.812540698	0.757913108	0.725235619	0.791254253	0.699522268	0.459490085	0.234487752	0.490565357	0.680578723	0.173019905	-0.055249343	0.035713382	0.526404295	0.750175031	0.249556582	0.655575304	0.430530382	0.435250444	0.718836288	0.571784715
ALDH4A1	0.106617029	0.792828536	0.367004747	0.642806053	0.860633325	0.710377651	0.769993356	0.787222407	0.636872024	0.835753984	0.748215421	0.873335322	0.80171375	0.692002797	0.871757617	0.074352592	0.375278541	0.594633843	0.723101916	0.403540083	0.573818086	0.787766372	0.540871103	0.142047964	0.518882871	0.57819122	0.353358126	0.489221497	0.211322039	0.722837659	0.616437807	0.836271501	0.870830433	0.84056758	0.570410633	0.328687166	0.325125395	0.758536538	0.336933178	-0.022540241	0.212639357	0.618958436	0.688087512	0.157065091	0.714970858	0.515602907	0.605397186	1	0.740192282
ADH1C	0.10466618	0.342325788	0.174510595	0.53730865	0.41993258	0.246345824	0.343250705	0.449697041	0.251536649	0.311430429	0.308525347	0.36307759	0.347715009	0.306781047	0.423384067	0.728011983	0.187528508	0.188343302	0.40516199	0.256625918	0.143819954	0.263138985	0.216636179	0.041399872	0.295929633	0.352567884	1	0.354542161	0.820935327	0.39559364	0.234995085	0.394202914	0.349504717	0.311352206	0.793939518	0.12166471	0.136913851	0.234015492	0.740218931	0.34345199	0.530236332	0.218318511	0.364630736	0.506350147	0.460128375	0.714818794	0.523608367	0.353358126	0.436210153
CYP4A27P	0.100869649	0.191849991	0.161691904	0.139132563	0.161791446	0.163723593	0.186968116	0.184606902	0.096574302	0.155821122	-0.001452692	0.215154268	0.183378034	0.167778837	0.215049103	0.132174599	0.254616852	0.137084579	0.234630713	0.17636874	0.114370071	0.182527544	0.059702503	0.023909393	0.073149905	0.09773276	0.110160909	0.03057332	0.106892929	0.103181094	0.365297826	0.040087136	0.21504279	0.080170467	0.15233349	-0.044379784	-0.005860142	0.185398198	0.086149638	0.016729248	0.122795021	0.031117614	0.175581465	0.016415187	0.229475593	0.212253122	0.071628522	0.179184418	0.232577677
ACOX1	0.100333098	0.849943624	0.601279694	0.765629209	0.774742261	0.753036664	0.81328169	0.819396577	0.61276498	0.907281835	0.880803508	0.912829541	1	0.785368603	0.924436291	0.144693702	0.548368534	0.692508692	0.882449515	0.478838069	0.646203449	0.883533745	0.537876748	0.066523295	0.57918815	0.64953308	0.347715009	0.444191977	0.269844133	0.80852015	0.83044618	0.768417439	0.760471813	0.817845481	0.659210051	0.37863919	0.424129734	0.702149685	0.286585571	-0.045324753	0.18358817	0.621565647	0.807620253	0.151686607	0.900311968	0.614587881	0.4234418	0.80171375	0.81035888
NDUFA10	0.099362894	0.877477624	0.548759186	0.825371923	0.840796562	0.766209132	0.845321454	0.868673882	0.670693594	0.89073087	0.822719535	0.910646204	0.912234082	0.781689172	0.952840946	0.264841315	0.572300526	0.635374173	0.849995371	0.511833428	0.593437386	0.860442336	0.585362201	0.059438972	0.531954036	0.638323086	0.477551369	0.471705193	0.372874197	0.829941277	0.769435157	0.813303329	0.816731176	0.842663493	0.69415649	0.378206608	0.423699153	0.755234775	0.405891089	0.065954535	0.254270446	0.598665365	0.781648777	0.179589514	0.883028139	0.674040383	0.461172856	0.840799772	0.825537179
CYP4A44P	0.098842125	0.355966723	0.310351308	0.297179655	0.35020879	0.313098857	0.352762439	0.318394813	0.241262208	0.24686787	0.230308166	0.312077299	0.347803221	0.353856091	0.363845933	0.116055795	0.384192563	0.264900936	0.273266904	0.297792571	0.158170507	0.260880472	0.148462158	-0.003607906	0.156499671	0.11645033	0.14457904	0.054741964	0.134106505	0.343405668	0.374798864	0.250105077	0.270925007	0.186851497	0.258357216	0.034597143	0.117098211	0.218118652	0.131888455	-0.102040046	0.108691394	0.070061592	0.32933548	0.07031133	0.389500452	0.270641298	0.029696319	0.179075484	0.239138214
IDH3A	0.096315954	0.858284493	0.493293296	0.801525689	0.770425096	0.757784503	0.864034059	0.802755282	0.720658644	0.901950546	0.830830202	0.907479984	0.88739011	0.678633138	0.902634677	0.211034829	0.463808238	0.711307928	0.879670475	0.467204793	0.74105705	0.877055687	0.624259306	0.085702806	0.575866874	0.640538228	0.381827787	0.447102261	0.289451047	0.851025781	0.851900839	0.798056862	0.768036051	0.843055167	0.66654201	0.31684927	0.466029296	0.80240545	0.335113186	0.010438577	0.20725797	0.6569919	0.724947948	0.150215441	0.816369727	0.538274062	0.432460707	0.770967056	0.706654083
PC	0.096306917	0.700077905	0.244173838	0.519715996	0.740666705	0.63440433	0.765988931	0.62878342	0.60101031	0.815967757	0.783425562	0.835066404	0.729375546	0.530197047	0.805949681	0.132166101	0.39152389	0.581717429	0.620290394	0.348595283	0.446571139	0.680294488	0.420743865	0.084612251	0.42112875	0.386902216	0.366982062	0.479838282	0.199015538	0.731937859	0.469861177	0.821189191	0.805601046	0.787682392	0.489063718	0.34555802	0.378390716	0.695614349	0.309796145	0.061007176	0.187284593	0.637859672	0.657072451	0.31519338	0.6043626	0.445096812	0.552762561	0.820246057	0.581234493
PFKL	0.096101582	0.794989361	0.386019469	0.620303324	0.870827563	0.61304052	0.90062577	0.70766664	0.573550181	0.913527452	0.851723006	0.954239648	0.868599231	0.76921413	0.92204392	0.165167794	0.493733417	0.59587986	0.760909153	0.382408446	0.5780976	0.793061399	0.514446086	0.069807266	0.578778416	0.563436821	0.379570932	0.515863448	0.266297628	0.795897287	0.686541787	0.828975371	0.930519071	0.866171851	0.59627936	0.25856061	0.4187292	0.747786092	0.318936539	-0.019838578	0.194234307	0.714174901	0.770930799	0.203843945	0.742073288	0.558662294	0.506177427	0.868289834	0.672356633
ALDH3A2	0.095049266	0.848645007	0.649461283	0.84221295	0.771317383	0.766875739	0.72244493	0.846025311	0.598694272	0.798451996	0.762774517	0.803073819	0.900311968	0.766751483	0.863042845	0.250693244	0.457091252	0.59809854	0.846090449	0.453441709	0.587761994	0.81044224	0.500756745	0.156408817	0.493016198	0.60702792	0.460128375	0.334819594	0.379800924	0.766012725	0.802149596	0.711528877	0.675117983	0.699360416	0.712138165	0.278505778	0.343198961	0.623641701	0.360307754	0.00875498	0.232707824	0.4447008	0.768859005	0.157294996	1	0.712238627	0.379797101	0.714970858	0.814571187
CPT2	0.093401155	0.86002227	0.479623312	0.787884337	0.853658527	0.804450906	0.778170447	0.852485474	0.660532847	0.862032309	0.838317402	0.871255585	0.887559781	0.711201737	0.901172514	0.189765438	0.447217155	0.630323571	0.791909455	0.370230989	0.518178629	0.820123902	0.563812383	0.192364955	0.500085494	0.612002924	0.448001679	0.459627066	0.305768047	0.796926319	0.638062186	0.852886418	0.804986128	0.818754455	0.674676413	0.370636115	0.332045072	0.689978328	0.372363239	0.015785681	0.245073642	0.570722134	0.776782593	0.216439382	0.837714188	0.649035818	0.58695814	0.888857348	0.827658636
PGM2	0.09141376	0.844737704	0.424403644	0.803549317	0.74338825	0.730821831	0.836913837	0.802082811	0.718749925	0.873890703	0.824007967	0.850572456	0.851456663	0.671640859	0.871068443	0.093916316	0.455771013	0.643013843	0.82493247	0.441220875	0.687912966	0.823134964	0.640322813	0.114755272	0.507525518	0.616286777	0.356480683	0.463906298	0.204059872	0.872501942	0.802985567	0.849126282	0.730080427	0.825418952	0.600621938	0.365631082	0.494955807	0.81279548	0.298863362	0.008283068	0.144960757	0.695801226	0.696049742	0.190737954	0.784492419	0.415602024	0.406806196	0.749545409	0.650387381
ECHS1	0.090250328	0.919943276	0.398055021	0.823055717	0.893116571	0.792059759	0.785832639	0.902698158	0.769382611	0.840176136	0.810051501	0.855589252	0.829413037	0.687705939	0.889460599	0.144195913	0.384919672	0.580917738	0.762265646	0.392491167	0.584546209	0.807708345	0.602016695	0.187056256	0.500741012	0.665426415	0.417334751	0.47177352	0.24755349	0.815099045	0.666579996	0.91452128	0.823346125	0.831976953	0.643541724	0.36208575	0.345270304	0.792217279	0.339772632	-0.005654832	0.19598424	0.577054817	0.719990804	0.198259077	0.815799848	0.559920883	0.535653107	0.898486707	0.736721673
ALDH1L2	0.087479663	0.473299768	0.104610762	0.460858644	0.479348765	0.402408354	0.628138289	0.415838754	0.360928856	0.729485184	0.670467009	0.676705329	0.621565647	0.554963441	0.648658573	0.081935976	0.313666762	0.307094862	0.56215384	0.241603713	0.450122291	0.535823741	0.560142726	0.136236862	0.540958608	0.558219167	0.218318511	0.565969125	0.155977841	0.532731051	0.497355681	0.622771979	0.619453437	0.816687613	0.384275502	0.303274512	0.446227643	0.716684915	0.175819516	0.030757729	0.117245216	1	0.381470188	-0.006461424	0.4447008	0.190908944	0.395840595	0.618958436	0.424486499
NDUFV1	0.086556307	0.852121146	0.467414695	0.728389278	0.934482264	0.716705345	0.918313433	0.800669683	0.65282833	0.846951673	0.786165861	0.910095578	0.846567347	0.76692968	0.930205101	0.228962894	0.559082801	0.610124493	0.76911811	0.44470694	0.572556604	0.811508311	0.573850616	0.112433929	0.503025909	0.546159892	0.448231286	0.456023709	0.337895557	0.847108511	0.708020933	0.868107309	0.926291298	0.823035479	0.652207056	0.282874918	0.382323536	0.739556201	0.379512776	0.027319489	0.216525251	0.596191292	0.785176015	0.225312138	0.803201612	0.64492706	0.586235313	0.895108004	0.766079216
PPATP1	0.084899184	0.07047764	0.125488731	0.306941914	0.108403611	0.067246669	0.067342198	0.178742692	0.004465874	0.083680959	0.071923147	0.107776203	0.14635416	0.091997206	0.179014772	0.670090614	-0.004822764	0.00659869	0.228549747	0.067146154	0.001782583	0.045447181	0.132644894	0.132625457	0.097902955	0.132553997	0.489328309	-0.019013446	0.696623005	0.079524331	0.155099966	0.036928379	0.108774815	0.061152075	0.455723561	-0.034695282	-0.029453917	0.037269781	0.433954289	0.173301309	0.357929554	-0.000194663	0.087461884	0.030265204	0.277861193	0.530943597	0.123947337	0.045519452	0.210255798
IDH3G	0.084492064	0.885426241	0.448623175	0.736646358	0.918706228	0.746716345	0.916059625	0.832791755	0.709481653	0.895076169	0.836553834	0.935912293	0.875526536	0.736265181	0.940424276	0.151371689	0.525079655	0.657967991	0.795483145	0.456048165	0.6001671	0.845119225	0.590916819	0.102927595	0.532752185	0.587978269	0.40162643	0.480863931	0.254155713	0.878983583	0.729600472	0.91317023	0.920398041	0.857950524	0.641965626	0.306950247	0.415323611	0.789655741	0.355712728	0.012153587	0.206757241	0.656906706	0.806292772	0.236844847	0.79418735	0.580807066	0.558014879	0.906152707	0.737718467
NDUFV3	0.08336892	0.829654971	0.555938582	0.776310598	0.85261475	0.762301055	0.851879294	0.819460026	0.663239558	0.834852661	0.762921193	0.861461075	0.879593804	0.759961966	0.895362052	0.204984965	0.595484795	0.629191338	0.806138757	0.460281661	0.556961602	0.839704855	0.5617186	0.152960533	0.488794774	0.554894879	0.389237045	0.368121287	0.301316164	0.825138907	0.743576332	0.831666196	0.817084484	0.798152612	0.648762151	0.288640589	0.395198738	0.716933465	0.332780257	0.039214768	0.193044914	0.567557765	0.764747594	0.188760314	0.832125825	0.620272609	0.573896518	0.835356754	0.820018595
ADH1B	0.083027602	0.629632979	0.322546001	0.707941567	0.528591811	0.499436541	0.426907834	0.74084341	0.488796843	0.646876958	0.593410165	0.611902783	0.64953308	0.60117444	0.633713339	0.089031691	0.241434627	0.304389719	0.629035465	0.225666991	0.407884975	0.55840367	0.540697277	0.028515316	0.763219877	1	0.352567884	0.532304026	0.225081349	0.456447447	0.549930381	0.514010263	0.475682891	0.570278709	0.609196882	0.406568817	0.2195202	0.539659488	0.377290437	-0.014506482	0.38534103	0.558219167	0.479740289	-0.059142358	0.60702792	0.403998281	0.188120561	0.57819122	0.559431146
PAAF1	0.082575795	0.810184291	0.506613645	0.842973447	0.792404161	0.732085051	0.77656467	0.848529917	0.652321345	0.816536016	0.784845829	0.82469801	0.860336204	0.743494622	0.871243433	0.342859735	0.424523705	0.559146165	0.813707393	0.381957738	0.560460054	0.797337504	0.65064337	0.14804208	0.56848822	0.713920944	0.529181428	0.472544431	0.459803448	0.78868432	0.699491226	0.799296982	0.740264699	0.786755691	0.783052184	0.339642885	0.33143612	0.670653812	0.482053086	0.049293445	0.342718828	0.601313475	0.732170016	0.15412579	0.837561191	0.70348589	0.54925264	0.798038635	0.802986142
SDHC	0.082314946	0.910837641	0.502138347	0.882369026	0.825434076	0.81482081	0.800273902	0.917342387	0.772949216	0.890891846	0.857257461	0.888008737	0.901713432	0.702253676	0.912112119	0.236222832	0.417059063	0.660501622	0.861181438	0.446990164	0.643492169	0.855351592	0.623109967	0.144444756	0.592726452	0.730478229	0.463114018	0.471522531	0.33760895	0.852436612	0.76418294	0.880365391	0.76234136	0.831062609	0.750363402	0.391381608	0.390648442	0.771151542	0.410152929	0.030259923	0.279032661	0.623589255	0.766390599	0.181168344	0.86790173	0.614722929	0.49627242	0.830915539	0.765268269
GCK	0.081339617	0.654957818	0.135685548	0.611295591	0.71216776	0.475649286	0.52805683	0.706976674	0.464296073	0.598104163	0.509204435	0.609425049	0.560110333	0.580867762	0.633969649	0.123858496	0.268333857	0.225512459	0.52035113	0.249960068	0.278546233	0.459819233	0.520121714	0.13759031	0.46755895	0.704283416	0.294490382	0.344219972	0.191089764	0.514540861	0.469725548	0.653553505	0.690391559	0.595087138	0.491759627	0.135024121	0.12083593	0.622740161	0.367625929	-0.051571742	0.34553081	0.479027518	0.472608592	0.045451226	0.555949867	0.384932289	0.288212163	0.66876305	0.494796135
CYP4A11	0.079919201	0.440418916	0.42855933	0.417065068	0.518732624	0.377015042	0.431317112	0.515555989	0.298870238	0.376405178	0.276671249	0.477396836	0.446921256	0.39776514	0.493998119	0.195127824	0.49793128	0.337270631	0.428890713	0.415026413	0.243772	0.381290083	0.180109095	-0.081764318	0.334850665	0.316793901	0.295289997	0.201819766	0.258918693	0.428008506	0.524775954	0.342835372	0.47937013	0.279736397	0.390829644	0.029650034	0.077343215	0.37195128	0.437437453	0.006640514	0.362173406	0.151301119	0.46811462	0.003897914	0.495440008	0.47855647	0.111093726	0.418300231	0.438995308
AHR	0.078827686	0.744620736	0.597685859	0.714147289	0.615524005	0.707426704	0.719122405	0.714689516	0.569198063	0.74309118	0.653690221	0.743958287	0.83044618	0.627777668	0.77161613	0.084636371	0.453972935	0.676932336	0.846537436	0.520955765	0.714199709	0.801193273	0.486112661	0.084130626	0.486146915	0.549930381	0.234995085	0.319578963	0.180313893	0.708490088	1	0.585686068	0.594325044	0.639874447	0.563170919	0.258574705	0.36477084	0.668879275	0.206546495	-0.075110374	0.108489221	0.497355681	0.65941871	0.064245437	0.802149596	0.471845708	0.276880699	0.616437807	0.655491818
ACSL5	0.078569837	0.800056576	0.633881848	0.695901309	0.706441081	0.768823403	0.790088807	0.771442023	0.743053877	0.868886807	0.787013485	0.865241148	0.883533745	0.682791413	0.875710333	0.034529161	0.424560096	0.802919529	0.876275635	0.44664608	0.766914552	1	0.521811684	0.075443973	0.475418728	0.55840367	0.263138985	0.342093359	0.146627748	0.767069878	0.801193273	0.734060317	0.693668304	0.789526332	0.571910562	0.416013719	0.410373763	0.688411828	0.206372157	-0.071903242	0.079157522	0.535823741	0.715566435	0.113815098	0.81044224	0.490607329	0.455161264	0.787766372	0.791062446
ALDH1L1	0.078460544	0.285169711	0.206655727	0.480355424	0.368431562	0.251359173	0.278956549	0.472254245	0.234337952	0.262762426	0.267991744	0.326607376	0.286585571	0.243682061	0.377548101	0.63815271	0.173053888	0.261916743	0.398178871	0.2369288	0.107874751	0.206372157	0.197358815	0.068477265	0.361233745	0.377290437	0.740218931	0.19724936	0.698878288	0.332581795	0.206546495	0.318955431	0.307467259	0.235872344	0.762136001	0.058932083	0.116223725	0.225065923	1	0.304568672	0.874663294	0.175819516	0.371877586	0.290053696	0.360307754	0.660927281	0.445704628	0.336933178	0.388428513
ALDH2	0.076714626	0.784069713	0.610436529	0.6475645	0.787440977	0.665033848	0.743698236	0.772792189	0.556081872	0.740047426	0.7841042	0.787079902	0.807620253	0.621581991	0.78137272	0.172059561	0.529548758	0.639879821	0.724702054	0.337694201	0.464185836	0.715566435	0.385654082	0.006538233	0.443967634	0.479740289	0.364630736	0.338064593	0.236458331	0.786591059	0.65941871	0.710619528	0.722258144	0.597234622	0.655795777	0.246084575	0.300131169	0.543539716	0.371877586	0.013457196	0.272123407	0.381470188	1	0.198317866	0.768859005	0.679220206	0.377654415	0.688087512	0.691753936
ACAA2	0.076559004	1	0.466458439	0.830993815	0.880197557	0.780301888	0.800307833	0.902348743	0.752197868	0.807237173	0.817114002	0.83938424	0.849943624	0.678747674	0.867915909	0.084893322	0.46207271	0.645109126	0.764302395	0.408365651	0.622897248	0.800056576	0.537866893	0.10613491	0.493386631	0.629632979	0.342325788	0.403854261	0.190277108	0.844916704	0.744620736	0.861708664	0.766366031	0.731178829	0.620146919	0.350069165	0.398211254	0.734019022	0.285169711	-0.016392686	0.170132198	0.473299768	0.784069713	0.206751332	0.848645007	0.549513523	0.387607787	0.792828536	0.689559838
NDUFS5	0.073081282	0.876405564	0.45852051	0.782442314	0.783655938	0.724988078	0.761130102	0.823255754	0.807082629	0.735605935	0.700997765	0.754058656	0.737538224	0.555394092	0.791791326	0.138711504	0.429974412	0.616243907	0.717204143	0.443635006	0.63852681	0.767553871	0.550986637	0.128238312	0.439974938	0.548611595	0.39231543	0.435753952	0.23230828	0.828952332	0.691410774	0.843396582	0.669173695	0.701844599	0.581343324	0.335985717	0.385206119	0.734180143	0.284596677	0.006047324	0.121143703	0.468565921	0.674554215	0.262951363	0.754490797	0.468746111	0.426124933	0.719139312	0.611232516
ADH6	0.072762597	0.190277108	0.185083869	0.450438464	0.268852353	0.109164319	0.255097908	0.284642253	0.09591825	0.208747793	0.214811978	0.273300152	0.269844133	0.254907086	0.319451747	0.853843042	0.166006826	0.116239785	0.361888143	0.173544044	0.107143559	0.146627748	0.184165575	0.061307056	0.213820729	0.225081349	0.820935327	0.154172508	1	0.257942181	0.180313893	0.228531669	0.23761677	0.235669045	0.699437793	-0.034005097	0.087022818	0.126287688	0.698878288	0.359938493	0.519990161	0.155977841	0.236458331	0.349740733	0.379800924	0.710023856	0.457261227	0.211322039	0.353937631
OXCT1.AS1	0.071362641	0.601802438	0.30951473	0.660651891	0.600714666	0.493452391	0.485430508	0.691056127	0.347030667	0.562719527	0.50962696	0.565701138	0.590949511	0.620118449	0.634097809	0.28094877	0.363898378	0.232387289	0.547266457	0.337648044	0.228659351	0.431530069	0.472978856	0.185569009	0.549998228	0.689285128	0.353705173	0.28647561	0.310499552	0.47146955	0.499294055	0.505235116	0.529251673	0.504856733	0.566331793	0.191206979	0.262860333	0.488293206	0.4392221	0.112666536	0.453817753	0.42264857	0.491104408	-0.011157952	0.619405886	0.496740942	0.229714437	0.539173441	0.512951891
ACSL3	0.069837128	0.764302395	0.585228487	0.783301065	0.663252199	0.761774009	0.741293199	0.788017746	0.650388846	0.863661635	0.763215877	0.841487299	0.882449515	0.647990621	0.867622741	0.22527521	0.409344393	0.765622997	1	0.450830929	0.727565857	0.876275635	0.566065922	0.150218544	0.510263165	0.629035465	0.40516199	0.372456689	0.361888143	0.729126273	0.846537436	0.660517779	0.65408374	0.750265593	0.718512893	0.342866677	0.435000938	0.687000546	0.398178871	0.044653402	0.255154119	0.56215384	0.724702054	0.180502257	0.846090449	0.616129271	0.445328754	0.723101916	0.777568538
IDH3B	0.069638724	0.912392683	0.512003031	0.780228437	0.902553017	0.75152013	0.903695684	0.85764013	0.72186784	0.896771519	0.825534434	0.935017254	0.887714787	0.768921124	0.951380991	0.177314563	0.521286962	0.650584766	0.82069568	0.474390626	0.616407438	0.859142601	0.583633356	0.073254209	0.544485232	0.624879816	0.407019085	0.460364673	0.277999171	0.862327984	0.772311018	0.865405627	0.874349328	0.828945235	0.65404606	0.306326587	0.409418988	0.776328724	0.339357764	0.008576212	0.196097289	0.607973565	0.803534337	0.196685446	0.844472701	0.615764044	0.465482321	0.858045355	0.744229012
PPAN	0.067090119	0.577949196	0.296946166	0.405680973	0.687598388	0.440801575	0.813516496	0.432254065	0.440579317	0.605726744	0.561399106	0.688154575	0.593824761	0.455420586	0.673098952	0.163141433	0.456637	0.566744006	0.611159276	0.344241373	0.63012809	0.626476	0.381704832	0.071338299	0.241884165	0.190245888	0.252961902	0.315730838	0.226884637	0.668596237	0.612639995	0.585432604	0.756276573	0.633789888	0.381763921	0.067865581	0.482647456	0.64443329	0.223211552	0.000722453	0.04418055	0.414601691	0.566871521	0.222786577	0.535055799	0.432715059	0.441012257	0.615792224	0.454442972
POR	0.067087612	0.823698696	0.472591535	0.655728971	0.881543649	0.713240882	0.869563496	0.763651463	0.663396457	0.844108732	0.81238506	0.899318326	0.829681058	0.63101079	0.871556774	0.188856135	0.446106523	0.705725021	0.771170873	0.376704628	0.610726338	0.797134274	0.427815652	0.11150807	0.465074633	0.47645357	0.442446936	0.446032	0.289530566	0.84274305	0.678057231	0.835840389	0.870678648	0.758193618	0.648140199	0.250664	0.369034866	0.694256183	0.401617593	-0.004980561	0.245876688	0.512184968	0.84751859	0.300484115	0.760780433	0.661575542	0.54461681	0.853363584	0.669330554
CYP4A22	0.065879315	0.372857136	0.381730116	0.383174096	0.423235932	0.30680199	0.431406901	0.3721112	0.131627295	0.253966796	0.211890416	0.349468771	0.381947973	0.411917721	0.42121496	0.378145447	0.436554686	0.212141966	0.357276168	0.386534203	0.142842528	0.259665912	0.126121701	-0.042564551	0.170278535	0.165959767	0.424383125	0.097554856	0.481395151	0.387305291	0.446371117	0.245655183	0.373148379	0.189884192	0.447493576	0.002225892	0.140423067	0.200223033	0.399554774	0.090906641	0.283823338	0.075298619	0.388014401	0.178517832	0.543002751	0.608712283	0.169549491	0.268274173	0.394311747
PKLR	0.065834768	0.370030834	0.172348206	0.276620551	0.454866719	0.279983428	0.289491596	0.408250918	0.239864644	0.336366443	0.191540239	0.382056012	0.303706726	0.299540189	0.374411855	0.02999303	0.256761469	0.206302583	0.312662297	0.366389413	0.24767314	0.257059609	0.161612511	-0.014091875	0.345672799	0.288071952	0.181522195	0.262564504	0.133323602	0.299282658	0.330780264	0.323826306	0.416860157	0.309595547	0.250168333	0.040546853	0.142706	0.420769123	0.317180037	0.045667339	0.251263686	0.22150194	0.328269157	0.007904267	0.307366678	0.240690793	0.106873737	0.448442919	0.267636772
ATP12A	0.064865962	0.188100276	0.114821608	0.384840544	0.243042637	0.127538759	0.26312935	0.259065542	0.106876176	0.23483943	0.226680946	0.274870395	0.252840079	0.149445242	0.307102008	0.822447437	0.16186684	0.142767449	0.378240031	0.219734954	0.073340768	0.141047429	0.159149266	0.057753178	0.192723933	0.187860619	0.845294975	0.235125303	0.858960256	0.266440306	0.162893465	0.227091277	0.227761674	0.237442104	0.699051945	-0.001529123	0.140177063	0.166977923	0.688069378	0.388683584	0.494739423	0.178370877	0.257636328	0.473420349	0.328174804	0.646835459	0.468916058	0.183605529	0.299027372
NDUFS6	0.064030903	0.852911016	0.39729769	0.771250762	0.906890237	0.690237909	0.82011901	0.818300619	0.742320807	0.767916017	0.748364269	0.808539943	0.747891391	0.62372884	0.844337573	0.25189263	0.392857743	0.558663148	0.714548351	0.388544698	0.600703323	0.747204951	0.526160723	0.168105148	0.442553566	0.540306396	0.476015041	0.427755726	0.335078362	0.822109625	0.636472573	0.872245113	0.817162119	0.771733582	0.637273363	0.250621735	0.400905574	0.774515767	0.386312025	0.042558523	0.214986111	0.512191813	0.71458423	0.234889511	0.777042036	0.610981804	0.509561519	0.806329284	0.640462859
ACSBG2	0.060580834	0.46207271	0.395301975	0.428908723	0.453977543	0.415642825	0.570215316	0.430277358	0.233217044	0.437338303	0.444401016	0.480325564	0.548368534	0.471801904	0.511686041	0.179489431	1	0.303543997	0.409344393	0.3839261	0.162297764	0.424560096	0.374404237	-0.029971832	0.252910358	0.241434627	0.187528508	0.219188818	0.166006826	0.554419817	0.453972935	0.431168555	0.490701489	0.440133729	0.281599634	0.318503926	0.38332763	0.366049811	0.173053888	-0.034561255	0.081127545	0.313666762	0.529548758	0.126966573	0.457091252	0.366515192	0.238958005	0.375278541	0.530041132
LHPP	0.058885675	0.845435816	0.432911415	0.739425783	0.901614687	0.728634808	0.819657551	0.838614714	0.66263043	0.812168478	0.758560052	0.872428123	0.8223453	0.702745167	0.882872462	0.198002367	0.501875409	0.643021496	0.745020505	0.470308094	0.561792119	0.775971595	0.617772234	0.138453604	0.531794333	0.561692268	0.454852322	0.475538245	0.315167884	0.845927242	0.671281703	0.878542568	0.865697759	0.774032534	0.692836508	0.29619223	0.342543936	0.691833145	0.413326017	0.038869612	0.247974497	0.578073998	0.791188599	0.254460112	0.752647312	0.598549815	0.625267832	0.894746571	0.752843508
PDHB	0.058501058	0.895004445	0.460976024	0.890192434	0.845987788	0.774422227	0.728101794	0.918083574	0.734040905	0.820578411	0.76693936	0.806498533	0.831218216	0.730380073	0.863635103	0.149105201	0.420819642	0.531163211	0.779196405	0.402765124	0.55566419	0.775455418	0.654198391	0.174041075	0.558606785	0.749517714	0.408335159	0.462751408	0.259855997	0.795739891	0.706821014	0.852244302	0.741780733	0.787655324	0.663696525	0.362492057	0.323612678	0.746969804	0.324571712	0.012284145	0.216887425	0.576613564	0.699481818	0.120185855	0.839531487	0.539236059	0.427863706	0.803544942	0.751888928
MINPP1	0.057354236	0.851263344	0.449292326	0.906762688	0.816283414	0.752841402	0.731364785	0.905487764	0.681694308	0.804802936	0.788106096	0.77866108	0.840574541	0.712982684	0.841389728	0.215389317	0.47289077	0.517684978	0.797874339	0.394712542	0.532219272	0.747141358	0.654330235	0.185037957	0.54836609	0.756427861	0.456216168	0.433129428	0.331296762	0.804689303	0.695938098	0.843398864	0.732833075	0.787676502	0.712807719	0.358861149	0.383085327	0.73817222	0.412517431	0.028424123	0.317489057	0.599077082	0.719166909	0.162505556	0.835534443	0.570246814	0.450191361	0.771897954	0.754209637
ACAT1	0.057308724	0.902348743	0.543635781	0.882540004	0.823717937	0.797478218	0.672753033	1	0.742080025	0.763475651	0.731789201	0.777668738	0.819396577	0.67157419	0.834045629	0.164887784	0.430277358	0.609553418	0.788017746	0.448910432	0.525401638	0.771442023	0.574560671	0.079615716	0.554303855	0.74084341	0.449697041	0.365873186	0.284642253	0.781632115	0.714689516	0.790370205	0.694780379	0.665550176	0.728996484	0.375137423	0.277106479	0.659422465	0.472254245	0.015997012	0.365385568	0.415838754	0.772792189	0.1760422	0.846025311	0.622436957	0.400762328	0.787222407	0.781177189
ALDH1A1	0.056144735	0.620146919	0.470247024	0.776909466	0.623678445	0.560904843	0.568867177	0.728996484	0.493275392	0.576702536	0.581958343	0.619323116	0.659210051	0.544450439	0.673537041	0.601066197	0.281599634	0.517394205	0.718512893	0.404759851	0.418305618	0.571910562	0.420420516	0.118359366	0.543471658	0.609196882	0.793939518	0.365279332	0.699437793	0.642319773	0.563170919	0.609889337	0.526880504	0.50294346	1	0.237524403	0.213519678	0.405884892	0.762136001	0.256060422	0.609971142	0.384275502	0.655795777	0.355582628	0.712138165	0.800427854	0.577145418	0.570410633	0.673227313
PPAT	0.055698878	0.684056153	0.32733023	0.746947993	0.581445536	0.664841967	0.722955932	0.674011243	0.584701339	0.763521672	0.73953754	0.713310149	0.738823727	0.546626263	0.751429154	0.198381039	0.458765697	0.564545482	0.780887353	0.334850502	0.661166494	0.743460334	0.720848823	0.136926419	0.382715166	0.564494842	0.340946893	0.41765379	0.302131407	0.756603207	0.642877456	0.720790014	0.605023836	0.814483077	0.558516716	0.416125417	0.554706684	0.742432001	0.301733423	0.039793226	0.142049763	0.629684991	0.560846606	0.153829093	0.652254164	0.40884724	0.40911063	0.650562492	0.626836501
COX15	0.054655552	0.875706592	0.519004143	0.870926494	0.813764063	0.791028166	0.80227246	0.888304401	0.691054859	0.885656102	0.872063865	0.886121768	0.933667043	0.740680974	0.910113108	0.205116291	0.549669154	0.625510705	0.8375617	0.429498381	0.573387167	0.835252805	0.667350291	0.109926756	0.578896543	0.714982653	0.424438384	0.477758548	0.332364721	0.860182554	0.749301428	0.861910774	0.791327987	0.838886456	0.708324211	0.41018635	0.375695611	0.736135217	0.37871201	0.013920895	0.25906549	0.650122369	0.791461916	0.167121116	0.866529668	0.606062765	0.494065662	0.826054918	0.821017941
ADH1A	0.053403709	0.493386631	0.350453372	0.493767042	0.497004839	0.385030995	0.423272886	0.554303855	0.421123916	0.590415959	0.482113516	0.591188445	0.57918815	0.491398149	0.557715207	0.125125279	0.252910358	0.372810866	0.510263165	0.321058093	0.359280966	0.475418728	0.35090332	-0.011559653	1	0.763219877	0.295929633	0.602667851	0.213820729	0.444526683	0.486146915	0.437968493	0.46641571	0.478255241	0.543471658	0.250098687	0.131377988	0.427749461	0.361233745	0.009563729	0.381018559	0.540958608	0.443967634	-0.009867115	0.493016198	0.337134071	0.19739162	0.518882871	0.435690319
ACADSB	0.053012643	0.780301888	0.519440182	0.76164185	0.654123328	1	0.666862423	0.797478218	0.709759524	0.721668865	0.660178708	0.703465681	0.753036664	0.492485762	0.759322335	0.070474369	0.415642825	0.70117738	0.761774009	0.427238297	0.519138084	0.768823403	0.581752649	0.299327965	0.385030995	0.499436541	0.246345824	0.333904649	0.109164319	0.758919596	0.707426704	0.729791666	0.595474995	0.652042735	0.560904843	0.434434459	0.282618492	0.614484767	0.251359173	-0.035426268	0.134925945	0.402408354	0.665033848	0.084581405	0.766875739	0.487352923	0.467871605	0.710377651	0.718545128
ACADS	0.052825772	0.880197557	0.405972673	0.709394161	1	0.654123328	0.824697274	0.823717937	0.639477972	0.762783834	0.746300319	0.832006268	0.774742261	0.719703861	0.853769026	0.161527388	0.453977543	0.544645316	0.663252199	0.379523372	0.509762665	0.706441081	0.485480748	0.11456814	0.497004839	0.528591811	0.41993258	0.422344533	0.268852353	0.816013182	0.615524005	0.871347184	0.915169048	0.721800458	0.623678445	0.189540919	0.283312051	0.678058931	0.368431562	0.013615125	0.241848846	0.479348765	0.787440977	0.254565265	0.771317383	0.609505854	0.509586848	0.860633325	0.679270697
NDUFB10	0.052578377	0.895648799	0.442529225	0.817227745	0.908263144	0.72474043	0.771177135	0.8988876	0.769975221	0.727563883	0.709254218	0.770714592	0.75769142	0.641911425	0.821952079	0.199067573	0.417649312	0.559328832	0.69285408	0.444407413	0.552919019	0.721538086	0.557915603	0.147925642	0.51091264	0.614106819	0.461016884	0.421205423	0.291672183	0.850122079	0.65218434	0.888311504	0.77605334	0.704022004	0.676483844	0.284168815	0.323384769	0.713671678	0.413372806	0.015789925	0.271877279	0.461398643	0.729395925	0.255537149	0.791169875	0.581561169	0.468942111	0.790822765	0.655103638
HADHB	0.050747339	0.929743015	0.497210063	0.86217183	0.860039629	0.795331583	0.8438681	0.910003509	0.698930077	0.891369052	0.85124177	0.900619596	0.922013259	0.755013047	0.930891544	0.170173902	0.503688867	0.675430006	0.867489179	0.466277586	0.632269976	0.843419695	0.606345893	0.133903564	0.580700557	0.69497948	0.440860466	0.48815334	0.29764262	0.881245001	0.796084891	0.879543072	0.812113703	0.825284541	0.717709364	0.349947801	0.424938848	0.775770777	0.389646557	0.038454364	0.256619522	0.630458528	0.804115923	0.243875822	0.871131755	0.584269298	0.465700763	0.837310059	0.754736245
NDUFA9	0.050726743	0.937367343	0.423202142	0.839833238	0.839216892	0.778843728	0.791940389	0.893869783	0.810380565	0.795386799	0.770413415	0.806158648	0.802186107	0.610197078	0.842987455	0.131423467	0.416611447	0.60974967	0.74600382	0.463211174	0.614576775	0.784347201	0.603983042	0.132081457	0.4889815	0.641368654	0.39235151	0.465003822	0.221217065	0.86446621	0.705773284	0.89762832	0.741808922	0.761401559	0.613256842	0.354745574	0.38864633	0.780108841	0.303571767	0.008809511	0.16234129	0.529808954	0.699997872	0.22888861	0.794161509	0.49065125	0.421036769	0.786495619	0.639522168
PPA1	0.050599133	0.848990122	0.468191577	0.782712914	0.724718694	0.779236234	0.693477796	0.821112091	0.823287565	0.672316064	0.637171383	0.670690502	0.702077255	0.487649973	0.731203989	0.041848373	0.274791306	0.65982431	0.742699498	0.467676993	0.718432583	0.782335706	0.520565301	0.194648218	0.381818607	0.541265335	0.288812654	0.327461923	0.135721715	0.769366414	0.740083759	0.756948633	0.575547041	0.651054302	0.537024078	0.314751598	0.415007119	0.731170611	0.21812031	-0.051194365	0.072398844	0.363962608	0.600279892	0.169980682	0.760287187	0.422412223	0.349170324	0.684283713	0.583421794
ACSL4	0.049761757	0.622897248	0.434359797	0.532795539	0.509762665	0.519138084	0.61954916	0.525401638	0.641515851	0.625468152	0.605347703	0.624303222	0.646203449	0.453483317	0.61929684	-0.079576939	0.162297764	0.722581641	0.727565857	0.378193285	1	0.766914552	0.379853731	0.075320488	0.359280966	0.407884975	0.143819954	0.315171047	0.107143559	0.613053975	0.714199709	0.552815069	0.452007842	0.604664487	0.418305618	0.332424284	0.481448486	0.607875463	0.107874751	-0.085774521	0.00347049	0.450122291	0.464185836	0.127832629	0.587761994	0.243813709	0.346329943	0.573818086	0.466884405
ECI1	0.049282655	0.877589137	0.43458223	0.750416103	0.929612457	0.653737349	0.739435065	0.86467929	0.698106954	0.683887509	0.657140597	0.763125256	0.716235476	0.624417501	0.782868027	0.194819854	0.445453362	0.520677208	0.640599524	0.435238283	0.495742302	0.667370948	0.461945381	0.070431125	0.502220809	0.583384463	0.438210554	0.394285267	0.268002663	0.780070794	0.639608447	0.810732431	0.807250806	0.64088595	0.631629457	0.208490386	0.259597619	0.674346812	0.397639844	0.00348652	0.27299528	0.380351921	0.739375541	0.21576226	0.751156469	0.599960256	0.412232896	0.775504696	0.626279154
ALDH8A1	0.048878506	0.448706746	0.448945918	0.435108135	0.46884318	0.416035215	0.555819968	0.411147195	0.177847834	0.366272327	0.424515622	0.436081033	0.514392361	0.475602328	0.465751554	0.105566069	0.671149901	0.345259432	0.411147942	0.269282398	0.211401713	0.387913142	0.302991624	-0.015266535	0.142537719	0.175248789	0.168517851	0.056999023	0.209188864	0.529749112	0.461583807	0.402302911	0.465164486	0.368151825	0.285469656	0.145416321	0.318531424	0.281226818	0.20836627	0.1410245	0.114073106	0.215759943	0.485535045	0.077075861	0.505784795	0.396714685	0.253912013	0.361744514	0.453123605
ACADVL	0.048790892	0.800307833	0.432004244	0.65117103	0.824697274	0.666862423	1	0.672753033	0.616549845	0.800948328	0.800770876	0.848254894	0.81328169	0.680046153	0.857121898	0.175642143	0.570215316	0.655594099	0.741293199	0.459769165	0.61954916	0.790088807	0.53097729	0.093682874	0.423272886	0.426907834	0.343250705	0.418611081	0.255097908	0.889309031	0.719122405	0.846854059	0.851194588	0.800559553	0.568867177	0.268012959	0.526077464	0.721979188	0.278956549	0.066022194	0.132117999	0.628138289	0.743698236	0.262536639	0.72244493	0.51121034	0.540516425	0.769993356	0.630668832
DLD	0.048733778	0.906179914	0.543390358	0.893294691	0.803461349	0.812431085	0.833522773	0.881704547	0.738660318	0.883597617	0.862707781	0.88350531	0.9111112	0.707945268	0.914724488	0.202404471	0.471894937	0.710571723	0.89487293	0.426221462	0.689280691	0.859658693	0.632481328	0.177117496	0.545669306	0.670994668	0.427956249	0.446542103	0.327119456	0.87782118	0.800223996	0.853234286	0.741038179	0.820830603	0.717127329	0.362673731	0.448422487	0.762177373	0.39310343	0.05865848	0.247290354	0.609518472	0.776750663	0.189146359	0.881245684	0.585244309	0.474304507	0.791032148	0.750763671
PDHX	0.04869643	0.916946796	0.58245	0.871450202	0.818001312	0.880221516	0.796478985	0.900093939	0.723398538	0.854637013	0.773991107	0.855048561	0.895859318	0.702133023	0.901950979	0.147924649	0.520666463	0.708262191	0.87877886	0.502256926	0.637316837	0.868677036	0.629723902	0.194172024	0.506114446	0.637870601	0.372884571	0.387803756	0.249191675	0.846624243	0.828336647	0.816880082	0.754165495	0.785883408	0.663361363	0.342193303	0.393671105	0.749734673	0.305161616	-0.009141409	0.188509625	0.543739901	0.759139672	0.157768592	0.898121875	0.578477575	0.443243537	0.806113179	0.785231396
ALDH9A1	0.046519376	0.863818709	0.456998123	0.877409525	0.798762077	0.738786557	0.749133773	0.883216477	0.7051059	0.849360202	0.840397898	0.851797992	0.863499552	0.732005152	0.884789463	0.188596791	0.42211602	0.5843385	0.807516621	0.353459521	0.599196593	0.826710795	0.675141091	0.129419253	0.56946194	0.765927902	0.449335409	0.45163574	0.324839364	0.789451011	0.699878143	0.845157383	0.764528331	0.829386554	0.703256956	0.433607862	0.368854507	0.725534052	0.368537595	0.004919711	0.258252937	0.629427988	0.708565667	0.094336884	0.823276864	0.556384117	0.502712246	0.831083497	0.780920192
COX6C	0.046253934	0.879351391	0.469931941	0.838774807	0.820341407	0.750797714	0.726375971	0.880270535	0.778388512	0.673221201	0.684640739	0.693615648	0.733104175	0.590366613	0.773416599	0.147948051	0.41683592	0.588123657	0.695402296	0.452057641	0.578811124	0.720503114	0.575883819	0.132218275	0.460238694	0.597399081	0.426207078	0.414983723	0.24467932	0.834156521	0.663351596	0.851964312	0.649743906	0.651233953	0.660964858	0.362973175	0.338132663	0.658606424	0.355026243	0.025983785	0.198101799	0.4082205	0.704965271	0.233103882	0.765032647	0.521813704	0.443304183	0.719749459	0.653960383
CYP4A26P	0.044899758	0.353648231	0.367492707	0.267012099	0.397241074	0.288792093	0.2881911	0.356874168	0.208351264	0.265792193	0.106329334	0.338185976	0.308593566	0.324589559	0.367091185	0.023844885	0.426307153	0.229006891	0.292592217	0.338970275	0.14422649	0.283481952	0.091204563	-0.022274747	0.137627233	0.096904468	0.12471904	0.071901053	0.077650295	0.261893575	0.430795571	0.173239836	0.364647708	0.170727607	0.096839616	-0.081459255	0.024634532	0.248332951	0.052486724	0.004751676	-0.040023309	0.017917112	0.298939784	0.048275241	0.411337748	0.265243874	0.047542056	0.2906214	0.355401855
HMGCL	0.044841539	0.889176439	0.488509141	0.855735706	0.885954174	0.780597174	0.772409021	0.918311013	0.736721046	0.790190306	0.783454208	0.815563313	0.840629048	0.710830538	0.875087516	0.214237931	0.418806016	0.594068789	0.767780348	0.406442806	0.531067742	0.782321883	0.626552849	0.161824134	0.522681842	0.671986229	0.480535673	0.437203103	0.351839588	0.826597369	0.652306264	0.889051925	0.780854258	0.765158525	0.740470289	0.355293245	0.304936512	0.6811381	0.432623487	0.049402515	0.283686582	0.527661926	0.765333884	0.222819175	0.832799266	0.650598841	0.588054057	0.873015292	0.799747686
NDUFS8	0.043335826	0.875282416	0.386499007	0.734932664	0.931588842	0.711360833	0.820414757	0.833711808	0.752662544	0.76486542	0.744292402	0.815638553	0.752687256	0.64275808	0.847172075	0.12010883	0.421904245	0.584117184	0.670786918	0.396498314	0.560593867	0.759164387	0.532530181	0.138625286	0.454664645	0.540278277	0.40187633	0.440117673	0.227234589	0.833823367	0.595523473	0.916581267	0.850901519	0.779228363	0.575234205	0.298736129	0.367241979	0.743283026	0.326115479	0.014805369	0.165731112	0.509533758	0.710962371	0.245679907	0.74234341	0.528199941	0.540567054	0.871890556	0.661480516
NDUFA8	0.042491905	0.891460576	0.431728547	0.867646613	0.878776457	0.716155628	0.753124346	0.900309457	0.756344003	0.758485474	0.74484639	0.772101047	0.778517286	0.664507589	0.825729393	0.228234837	0.38155713	0.525918377	0.72087288	0.379324666	0.565824781	0.744815093	0.585619787	0.145771876	0.504061524	0.66373179	0.503420757	0.442802292	0.32597866	0.834036547	0.644728575	0.890990183	0.742322122	0.742230426	0.709236319	0.300715585	0.326605146	0.726172742	0.39772793	0.049228841	0.256638347	0.497957073	0.717653129	0.249542392	0.804149836	0.582521466	0.486267002	0.791080197	0.689835436
ALDH16A1	0.04096534	0.766366031	0.296041426	0.587194004	0.915169048	0.595474995	0.851194588	0.694780379	0.531820162	0.80743839	0.755646762	0.870708452	0.760471813	0.685604795	0.855268112	0.163801144	0.490701489	0.507637572	0.65408374	0.336780573	0.452007842	0.693668304	0.519243882	0.112112154	0.46641571	0.475682891	0.349504717	0.445797201	0.23761677	0.760285768	0.594325044	0.823008057	1	0.799044529	0.526880504	0.1921315	0.307274376	0.710368052	0.307467259	-0.0187585	0.185571168	0.619453437	0.722258144	0.207608305	0.675117983	0.537136657	0.534726825	0.870830433	0.643297292
ACAT2	0.040045501	0.752197868	0.443452657	0.679387064	0.639477972	0.709759524	0.616549845	0.742080025	1	0.671598187	0.633835157	0.656436193	0.61276498	0.356261836	0.67216695	0.012914401	0.233217044	0.684169336	0.650388846	0.368797376	0.641515851	0.743053877	0.48168953	0.069971919	0.421123916	0.488796843	0.251536649	0.309427542	0.09591825	0.720276361	0.569198063	0.740968224	0.531820162	0.583282415	0.493275392	0.463364808	0.254619466	0.593985433	0.234337952	-0.007295546	0.099834715	0.360928856	0.556081872	0.195367145	0.598694272	0.337926196	0.423017538	0.636872024	0.573123865
GCDH	0.039356936	0.857559233	0.449549676	0.771061888	0.909786404	0.781519478	0.851823815	0.849587788	0.760344152	0.847332159	0.787741776	0.880176251	0.811807123	0.685486201	0.891701352	0.154830407	0.470326205	0.640124763	0.735186599	0.441947313	0.551235847	0.803668886	0.613990634	0.137292144	0.549245999	0.597893937	0.40083229	0.454893674	0.247574337	0.871969637	0.660603888	0.920635648	0.887437173	0.815727	0.649400087	0.331870474	0.304457504	0.73423007	0.396728844	-0.003566513	0.271011285	0.610533289	0.754908089	0.208768512	0.766579796	0.546397364	0.582427734	0.899366642	0.745918785
ALDH6A1	0.03896809	0.678244729	0.649288917	0.685531833	0.64108948	0.741215297	0.61332882	0.780981433	0.577825394	0.77292784	0.667339465	0.7771869	0.846829292	0.693096625	0.791481535	0.086875593	0.402386902	0.693642259	0.812956464	0.488737813	0.548575598	0.829629733	0.481506591	0.077856226	0.579739277	0.635442067	0.282020691	0.288920822	0.225850499	0.634480553	0.706463477	0.633038163	0.631552993	0.669482068	0.659053427	0.360075998	0.195987177	0.520239188	0.350285251	-0.043820052	0.290177628	0.502105506	0.671880757	0.084202357	0.760560599	0.54444869	0.504682743	0.791209372	0.855202888
HADH	0.035538363	0.892720006	0.459499165	0.886493307	0.85288213	0.76822569	0.781732799	0.895600882	0.759453264	0.760850396	0.790619904	0.797550397	0.804457895	0.611731158	0.827953569	0.338031038	0.425030122	0.64015499	0.776268852	0.444608593	0.591250598	0.745246628	0.588995102	0.159520549	0.499691356	0.619726851	0.543996032	0.415906184	0.418104607	0.873535066	0.686084002	0.898116395	0.752079835	0.730344133	0.806365115	0.335678404	0.327675473	0.684704257	0.514148884	0.083867352	0.361707875	0.512125365	0.77030854	0.279737521	0.801719429	0.647316804	0.582290364	0.787279489	0.724449056
NDUFS7	0.034980913	0.870505752	0.425634163	0.728587011	0.96447823	0.671850562	0.862724985	0.834148907	0.694705175	0.785813678	0.762865968	0.86088945	0.791925303	0.700448348	0.868792595	0.16060433	0.494340319	0.598946022	0.696657366	0.401446477	0.54820515	0.755306767	0.526758237	0.085346422	0.508423581	0.553558563	0.417767519	0.421738801	0.271095188	0.858910999	0.641827328	0.903908291	0.911438555	0.754013649	0.633336118	0.238765764	0.337770082	0.707242287	0.381017122	-0.012716612	0.244427306	0.526582689	0.781888884	0.268137876	0.749844862	0.585968155	0.536271059	0.868004028	0.684723352
ALDH7A1P2	0.031712236	0.350669106	0.410671241	0.273087968	0.376376306	0.374420568	0.381256567	0.360627519	0.258630104	0.341264024	0.18276557	0.40844105	0.38483405	0.294096192	0.39403131	0.076845522	0.530470231	0.397185639	0.375579024	0.50264127	0.165605725	0.36935749	0.171591108	-0.033774446	0.226127033	0.130136852	0.132009888	0.127483598	0.08645442	0.365864702	0.412768105	0.293147228	0.420555781	0.321200204	0.184090693	0.047707974	0.098826524	0.302841401	0.067919193	0.076181338	-0.009807338	0.218264523	0.322841458	0.073647908	0.362384151	0.209142916	0.22494333	0.377649923	0.404215628
NDUFA12	0.026633412	0.880445294	0.445519003	0.876784444	0.777696304	0.729041069	0.693393111	0.886757455	0.792578255	0.705995031	0.69871408	0.706129226	0.733219207	0.570546887	0.769805414	0.174150573	0.352194512	0.565458137	0.728509237	0.387934012	0.591589131	0.727261587	0.588376841	0.130767062	0.46514522	0.651050509	0.427562219	0.363741772	0.273732101	0.811949748	0.667415746	0.835832198	0.61657475	0.666454436	0.663210453	0.299340029	0.337693118	0.69647255	0.351249853	0.036312679	0.216771937	0.43402761	0.668384336	0.243020799	0.776318332	0.50929733	0.370825991	0.682382553	0.621381264
ALDH3B2	0.026116194	0.387607787	0.194922367	0.439371002	0.509586848	0.467871605	0.540516425	0.400762328	0.423017538	0.398852473	0.406349534	0.458069545	0.4234418	0.324817763	0.478415062	0.349120946	0.238958005	0.430255645	0.445328754	0.259189929	0.346329943	0.455161264	0.430900468	0.357565485	0.19739162	0.188120561	0.523608367	0.291043715	0.457261227	0.536480908	0.276880699	0.618722726	0.534726825	0.478814324	0.577145418	0.206588735	0.141387176	0.305044415	0.445704628	0.219137509	0.222779581	0.395840595	0.377654415	0.384115948	0.379797101	0.434381877	1	0.605397186	0.550345456
COX5B	0.024636859	0.876102459	0.373335225	0.769609114	0.845988793	0.709085076	0.709803295	0.844986993	0.757459854	0.649920205	0.651441007	0.695444004	0.671120097	0.492749371	0.732422934	0.158524326	0.352108223	0.54455368	0.614998438	0.423599206	0.500040028	0.641962708	0.499321658	0.161175159	0.449651714	0.534086036	0.392321786	0.404146901	0.225671633	0.816440805	0.603020379	0.851168264	0.717939923	0.621520111	0.58892937	0.234365692	0.274086572	0.684624334	0.355207341	0.005134804	0.2180738	0.384565845	0.674935841	0.250609447	0.717252802	0.493204641	0.403504932	0.708320815	0.531355625
UQCRFS1	0.024388058	0.917209032	0.421738013	0.805277549	0.818459669	0.777450488	0.754817284	0.873401256	0.813755814	0.71383183	0.702084716	0.741909812	0.737688392	0.552479959	0.792518217	0.08803901	0.357528886	0.653032925	0.709388768	0.46594226	0.649815724	0.758514762	0.535979549	0.180020437	0.433426502	0.560166292	0.389834148	0.411767783	0.188408942	0.856548056	0.699123575	0.871657518	0.685444834	0.685461327	0.603328525	0.328943714	0.382861151	0.729783883	0.317428629	-0.014315802	0.155923436	0.424026405	0.68182381	0.278705726	0.763509222	0.458116997	0.431435141	0.75192852	0.587820175
ACSL6	0.024335302	0.537866893	0.188282946	0.662068871	0.485480748	0.581752649	0.53097729	0.574560671	0.48168953	0.571076549	0.510550256	0.517699014	0.537876748	0.421430272	0.5782722	0.089249927	0.374404237	0.312487177	0.566065922	0.248207746	0.379853731	0.521811684	1	0.253805714	0.35090332	0.540697277	0.216636179	0.389237342	0.184165575	0.628479104	0.486112661	0.616891834	0.519243882	0.594345733	0.420420516	0.283416136	0.252986686	0.525304006	0.197358815	0.007540139	0.083421916	0.560142726	0.385654082	0.00882586	0.500756745	0.222738494	0.430900468	0.540871103	0.560252194
ALDH1L1.AS2	0.022545431	0.170132198	0.193423583	0.342014887	0.241848846	0.134925945	0.132117999	0.365385568	0.099834715	0.155908704	0.150435331	0.203838006	0.18358817	0.187323013	0.223380799	0.51594788	0.081127545	0.153038155	0.255154119	0.166510245	0.00347049	0.079157522	0.083421916	0.079386091	0.381018559	0.38534103	0.530236332	0.137536779	0.519990161	0.176789346	0.108489221	0.160845389	0.185571168	0.101820944	0.609971142	-0.031549691	0.013433371	0.133937545	0.874663294	0.222015548	1	0.117245216	0.272123407	0.116843139	0.232707824	0.505098059	0.222779581	0.212639357	0.227564122
PFKFB2	0.018578441	0.602854644	0.839181477	0.53782492	0.515434096	0.699141673	0.550723898	0.641135542	0.615719689	0.653945908	0.58097825	0.685458869	0.736014101	0.504714917	0.680576945	0.023858145	0.455327851	0.77597979	0.718133568	0.436533915	0.542704071	0.791466416	0.294174306	0.001993327	0.417738883	0.386326978	0.166495971	0.204775995	0.115324495	0.58623776	0.663141174	0.463919484	0.467645341	0.507572373	0.451238728	0.371179446	0.169691167	0.390572953	0.18691222	-0.050317337	0.091055431	0.268071389	0.67823761	-0.008050112	0.692425779	0.491258873	0.324683056	0.579464103	0.72003478
AKR1A1	0.014415926	0.861708664	0.328179961	0.75828588	0.871347184	0.729791666	0.846854059	0.790370205	0.740968224	0.768754791	0.809568358	0.791208016	0.768417439	0.618739618	0.819587019	0.116549117	0.431168555	0.588716542	0.660517779	0.37403922	0.552815069	0.734060317	0.616891834	0.200754012	0.437968493	0.514010263	0.394202914	0.473800035	0.228531669	0.91208801	0.585686068	1	0.823008057	0.792455145	0.609889337	0.358971256	0.380269685	0.714487109	0.318955431	0.012937509	0.160845389	0.622771979	0.710619528	0.298825455	0.711528877	0.438114863	0.618722726	0.836271501	0.632822984
COX11	0.013353708	0.876700722	0.549436711	0.923058791	0.783161768	0.765787779	0.69340362	0.925962542	0.722097739	0.721159055	0.691897337	0.726536926	0.781038681	0.680365847	0.799719655	0.189464426	0.459829797	0.561282036	0.754118394	0.45733215	0.548589161	0.740288068	0.628777492	0.115645794	0.559042904	0.736866941	0.429259826	0.383090222	0.308106053	0.799009089	0.733343046	0.780680332	0.641680458	0.679485082	0.698914078	0.337670626	0.309749166	0.662268838	0.396237914	0.015264252	0.296566917	0.463296376	0.687158786	0.113703708	0.830566421	0.537467679	0.369714647	0.696863511	0.727406373
NDUFC1	0.01290453	0.83785719	0.527953499	0.866759953	0.810039623	0.732810496	0.68942735	0.89924454	0.760948668	0.644229936	0.631342984	0.666859863	0.716728345	0.586392515	0.751525492	0.228701574	0.403965718	0.572467291	0.714477373	0.472102111	0.559195945	0.716253974	0.550745121	0.131817264	0.451707082	0.595121766	0.474503214	0.337760944	0.326187982	0.812293924	0.68207845	0.798531546	0.638564746	0.619262043	0.697971862	0.291853978	0.305138929	0.63599184	0.407809762	0.050590644	0.25782184	0.347768563	0.695144315	0.222810885	0.792508857	0.583859835	0.434837607	0.691511592	0.689834089
NDUFA5	0.012813939	0.763417404	0.570530856	0.915609377	0.618701703	0.720313257	0.545158933	0.868934583	0.683891704	0.566345674	0.582244635	0.551101389	0.674286278	0.529039248	0.660318814	0.275804414	0.359714913	0.529376232	0.734719316	0.40565462	0.527141215	0.65429629	0.542780307	0.09339953	0.440255274	0.672141282	0.493460866	0.258898121	0.381275322	0.700876541	0.677734774	0.642770618	0.426370076	0.51754643	0.744974856	0.342046971	0.277266235	0.525422021	0.452003962	0.112528906	0.337666893	0.298070484	0.623388867	0.161033438	0.784292451	0.580863005	0.323729698	0.520155887	0.677274751
NDUFAB1	0.01225197	0.846061261	0.376116025	0.823234191	0.78646784	0.689666308	0.651734346	0.83848927	0.771489769	0.590251867	0.606149337	0.610394295	0.628152317	0.474496104	0.684609753	0.213324374	0.305907162	0.4948928	0.606476127	0.408762744	0.523118299	0.61493547	0.522026003	0.182060378	0.399606276	0.539923879	0.444742661	0.371488293	0.288210375	0.791622324	0.586950165	0.814745626	0.606203908	0.593880779	0.612282633	0.264564765	0.294118222	0.655328625	0.35185944	0.04094508	0.196529276	0.330464311	0.605390034	0.251564903	0.721335776	0.484303559	0.381911134	0.64520731	0.530153741
NDUFB11	0.011225971	0.908617612	0.394723331	0.782623744	0.908645948	0.755145698	0.771635788	0.883289515	0.76423634	0.773956165	0.742618202	0.809697762	0.771318136	0.635658564	0.84507176	0.099973874	0.407325757	0.577883531	0.699086285	0.426922503	0.547643951	0.756207527	0.575742815	0.146141904	0.486666307	0.604796786	0.365778128	0.452687186	0.191053515	0.82821915	0.646347773	0.911095035	0.826590388	0.764664882	0.597053448	0.295720127	0.29482385	0.75469665	0.315926724	-0.023814581	0.171012143	0.508784469	0.721918589	0.206930325	0.763448529	0.504544273	0.480229362	0.855501687	0.667988857
CYP4A22.AS1	0.009747723	0.288770017	0.151544199	0.293448731	0.317985566	0.346695893	0.466842747	0.209241948	0.273617029	0.278997872	0.199863995	0.297652789	0.27987498	0.241381582	0.358875137	0.068305126	0.276301726	0.289771907	0.330008101	0.198743108	0.287941314	0.331829303	0.33994	0.34052351	0.018304427	0.039415591	0.142339275	0.174349275	0.158950033	0.409543371	0.346504779	0.380539387	0.359125196	0.370894261	0.136128993	0.084154012	0.296922913	0.379241625	0.148427187	0.016145544	0.006119978	0.307828803	0.170390201	0.094431469	0.303225489	0.150072774	0.398284543	0.356504277	0.25609656
PFKFB4	0.008466284	0.784866718	0.402287114	0.661665474	0.777926681	0.730263388	0.895956949	0.706754175	0.678196208	0.782875179	0.811454526	0.809282312	0.801772798	0.575698453	0.819339856	0.124424889	0.510244622	0.698381386	0.715003875	0.377261373	0.505221826	0.744603122	0.538925497	0.148592072	0.469709837	0.471054794	0.336923081	0.459879644	0.206108224	0.898724103	0.6395652	0.872400199	0.800663304	0.739408674	0.587887822	0.373554473	0.455277841	0.657546914	0.318197979	0.036281415	0.193141916	0.621734485	0.780308029	0.307817596	0.692757995	0.491257931	0.555657521	0.759790204	0.630217268
COX5A	0.006958636	0.878873748	0.3830043	0.795913426	0.810111016	0.786938571	0.732315285	0.835502211	0.812344111	0.684473145	0.680936894	0.694579125	0.701999453	0.504075816	0.756616857	0.10131677	0.315640914	0.619989123	0.668798137	0.420159963	0.590646352	0.719568065	0.560675385	0.261568217	0.386105443	0.502418108	0.400166072	0.42437889	0.199002346	0.864001047	0.611908332	0.905978874	0.672396518	0.683821123	0.595078079	0.316574763	0.357629545	0.706396196	0.310910709	0.006991117	0.146451922	0.42848094	0.651662668	0.309812441	0.739822825	0.442974448	0.491573124	0.746080267	0.573795181
MDH1	0.005718003	0.906638191	0.405226435	0.864075618	0.832499845	0.767830576	0.777918586	0.877112321	0.777585922	0.753309424	0.810975123	0.762319477	0.793406735	0.577307077	0.80937825	0.188940876	0.435662469	0.615103764	0.713899425	0.399655707	0.547950823	0.733309111	0.610355288	0.152093776	0.454479397	0.595532174	0.4790556	0.460711347	0.288520334	0.914333009	0.633053489	0.944283848	0.723630084	0.729105711	0.699620447	0.389746174	0.367916294	0.690519902	0.386667614	0.057698958	0.236963616	0.522488152	0.754833877	0.328294603	0.774623112	0.528169376	0.50909933	0.760180122	0.659948513
ACSL6.AS1	0.005700359	0.10613491	0.028543189	0.174833263	0.11456814	0.299327965	0.093682874	0.079615716	0.069971919	0.087044057	0.028036832	0.047143859	0.066523295	0.042934698	0.090931578	0.143863589	-0.029971832	0.066116391	0.150218544	-0.064819765	0.075320488	0.075443973	0.253805714	1	-0.011559653	0.028515316	0.041399872	0.089459992	0.061307056	0.148176975	0.084130626	0.200754012	0.112112154	0.143260755	0.118359366	0.017012387	0.107149203	0.142822534	0.068477265	-0.005294469	0.079386091	0.136236862	0.006538233	0.027422038	0.156408817	0.062885752	0.357565485	0.142047964	0.02219377
CYC1	0.00543974	0.894440938	0.364097004	0.756428829	0.863470786	0.70367237	0.786204367	0.84138128	0.811799623	0.717047677	0.700967244	0.756799824	0.709680459	0.547295046	0.777198312	0.078368755	0.363079364	0.606633106	0.657712091	0.453586212	0.608617165	0.716386753	0.528964995	0.131776422	0.479105974	0.562130906	0.357492456	0.421824913	0.172462185	0.857592425	0.656586975	0.893363065	0.756458266	0.692162588	0.56689546	0.28010126	0.373131532	0.743133374	0.308151837	-0.031263132	0.180678769	0.477984313	0.663813898	0.272323122	0.705598327	0.42502776	0.418836422	0.763883954	0.534779327
NDUFA13	0.00187383	0.817449956	0.319675207	0.717572063	0.845214691	0.600922682	0.713092708	0.785914327	0.744950468	0.556248728	0.591293106	0.618507964	0.590383344	0.494650446	0.670828169	0.155746932	0.300930331	0.492080462	0.53643644	0.38817051	0.528459618	0.595953125	0.479754232	0.145145624	0.3838071	0.477543997	0.423122746	0.351715626	0.256846462	0.801149286	0.526100113	0.859270851	0.682195904	0.582863439	0.580394158	0.231693877	0.316906106	0.629270395	0.349449632	0.04379115	0.199785711	0.350659913	0.610042991	0.317623312	0.63974791	0.45432967	0.476813809	0.703474984	0.486352612
NDUFB2	-0.000670941	0.826836876	0.331113116	0.778588236	0.788160249	0.64426646	0.669345509	0.805911452	0.78048329	0.605411189	0.656311893	0.619541867	0.61743214	0.496773054	0.672912376	0.111134755	0.281786498	0.4754149	0.565512151	0.31686755	0.547985246	0.619108564	0.52411326	0.15914268	0.385579348	0.534851628	0.372982711	0.378881726	0.199328964	0.79877043	0.530470789	0.86906353	0.611119506	0.624803862	0.552179513	0.290673223	0.318639748	0.663038047	0.29240038	0.009223942	0.161094178	0.398312154	0.611201633	0.216976803	0.664544014	0.39594707	0.409599992	0.674680492	0.500911343
NDUFS3	-0.001158849	0.882229542	0.391571493	0.835509631	0.865213519	0.730124921	0.73966939	0.875512363	0.765429672	0.673457561	0.695982966	0.700077702	0.716045108	0.565662495	0.762906661	0.188681775	0.395861545	0.531988596	0.64042528	0.417166	0.494405518	0.676954174	0.566246595	0.179535934	0.450450285	0.582235962	0.484882578	0.444420042	0.282744896	0.862603451	0.581085727	0.911300391	0.720066571	0.676814322	0.656766544	0.31710046	0.317608001	0.677244512	0.382315043	0.040872646	0.225562316	0.430859143	0.694125458	0.307153286	0.750350989	0.525585927	0.498759633	0.756891432	0.62419548
ACADM	-0.00196986	0.830993815	0.511508891	1	0.709394161	0.76164185	0.65117103	0.882540004	0.679387064	0.696122406	0.696457875	0.686126531	0.765629209	0.62445932	0.771230806	0.329458278	0.428908723	0.531301445	0.783301065	0.381972656	0.532795539	0.695901309	0.662068871	0.174833263	0.493767042	0.707941567	0.53730865	0.346921481	0.450438464	0.783288569	0.714147289	0.75828588	0.587194004	0.64714168	0.776909466	0.35657542	0.298186764	0.603810139	0.480355424	0.115984939	0.342014887	0.460858644	0.6475645	0.160000641	0.84221295	0.602997742	0.439371002	0.642806053	0.748553564
NDUFC2	-0.002369063	0.846109931	0.448869685	0.879401355	0.763103142	0.722144764	0.618799238	0.895122065	0.699670831	0.592825781	0.631189691	0.600322257	0.701192083	0.576391526	0.706562526	0.188147721	0.374075958	0.485276552	0.656604693	0.391263811	0.486054609	0.650638057	0.572910255	0.182659209	0.427649345	0.662752366	0.436044786	0.353559281	0.294943434	0.76105857	0.614297716	0.79084327	0.581419734	0.604040469	0.664347004	0.345049721	0.29730308	0.619407111	0.382331042	0.058384826	0.259827027	0.355433807	0.642152556	0.186568752	0.777043397	0.532613854	0.405123287	0.674200311	0.652240846
NDUFA1	-0.002854939	0.830765992	0.422050738	0.828806731	0.744416417	0.698016553	0.667362736	0.829754522	0.796956843	0.592937193	0.63242617	0.609160351	0.65110008	0.488972731	0.678806942	0.169487954	0.348406169	0.530639492	0.616206784	0.416532628	0.546594629	0.643784217	0.553219491	0.143157271	0.43025928	0.560449735	0.438240671	0.384702113	0.259604215	0.825672192	0.597202311	0.838314122	0.555158525	0.579628777	0.639540132	0.331012072	0.321524516	0.609530741	0.339435609	0.044836516	0.184763012	0.376350876	0.623757156	0.274147976	0.707865192	0.45320376	0.424722982	0.617537889	0.551459174
NDUFB8	-0.008364361	0.879895895	0.428430893	0.807349002	0.830287194	0.706011343	0.749609406	0.856945505	0.811105922	0.650570133	0.672577166	0.687413288	0.701575854	0.545456999	0.749193464	0.144745994	0.376416395	0.576576596	0.642946306	0.457425798	0.581668586	0.697644937	0.567615987	0.144488059	0.4526225	0.569542654	0.415416686	0.416528927	0.248784967	0.866433609	0.634906847	0.887500468	0.68089105	0.647097358	0.624471045	0.318479887	0.336538117	0.67434469	0.339616161	0.01413072	0.186128875	0.41639508	0.669200519	0.277188579	0.728938559	0.465325253	0.459797515	0.719881359	0.573318954
ADH4	-0.009397594	0.403854261	0.054238818	0.346921481	0.422344533	0.333904649	0.418611081	0.365873186	0.309427542	0.478577531	0.446951536	0.459986074	0.444191977	0.319453718	0.462892097	0.063335497	0.219188818	0.208791294	0.372456689	0.300596652	0.315171047	0.342093359	0.389237342	0.089459992	0.602667851	0.532304026	0.354542161	1	0.154172508	0.433543989	0.319578963	0.473800035	0.445797201	0.511940142	0.365279332	0.3790839	0.260959827	0.468071542	0.19724936	-0.004393675	0.137536779	0.565969125	0.338064593	0.125377338	0.334819594	0.186355008	0.291043715	0.489221497	0.290166912
PFKFB1	-0.011094905	0.466101428	0.425751784	0.476557027	0.50933147	0.516314404	0.584137806	0.446369614	0.373568068	0.490839812	0.479625725	0.542627779	0.528278052	0.376614873	0.553353253	0.262999064	0.533585437	0.488556495	0.466048943	0.269679739	0.273431389	0.484944049	0.445001777	0.200789083	0.227536421	0.145646011	0.293260694	0.232401614	0.317681381	0.646101984	0.387624841	0.549110061	0.54412917	0.516122826	0.383180587	0.20403375	0.206107486	0.344846836	0.258532902	0.078840033	0.129615972	0.334170822	0.514967238	0.263272219	0.48827669	0.412580038	0.475787931	0.498287704	0.539351875
ALDH1L1.AS1	-0.015478195	-0.016392686	0.010358319	0.115984939	0.013615125	-0.035426268	0.066022194	0.015997012	-0.007295546	-0.016067965	-0.018039131	-0.00475933	-0.045324753	-0.022136055	0.012479165	0.39590653	-0.034561255	-0.054275596	0.044653402	0.051289341	-0.085774521	-0.071903242	0.007540139	-0.005294469	0.009563729	-0.014506482	0.34345199	-0.004393675	0.359938493	0.024873039	-0.075110374	0.012937509	-0.0187585	-0.009037127	0.256060422	-0.080386481	0.043423604	-0.031729522	0.304568672	1	0.222015548	0.030757729	0.013457196	0.141598478	0.00875498	0.215914008	0.219137509	-0.022540241	0.032446724
NDUFS4	-0.01684613	0.845547559	0.486361282	0.876895412	0.745091415	0.696379638	0.632177561	0.886024662	0.740387647	0.609211826	0.609145722	0.618939767	0.685452398	0.573898392	0.706660793	0.169241443	0.360639862	0.511327244	0.678517437	0.455060913	0.562050762	0.661767805	0.551590012	0.120427285	0.462180826	0.654636198	0.453111424	0.359920724	0.28112051	0.778090105	0.675477449	0.769779332	0.550333642	0.571838362	0.678367954	0.28886734	0.300996805	0.617211087	0.372610555	0.024057465	0.242793896	0.358849411	0.634099113	0.214996833	0.774503954	0.497614637	0.345126838	0.621256268	0.608068645
NDUFB4	-0.01951326	0.875738049	0.482267239	0.869459943	0.832967697	0.758580594	0.710267209	0.903460977	0.755795979	0.683325599	0.667785398	0.697014722	0.749012124	0.613963873	0.773454409	0.152314623	0.403324302	0.562141046	0.714176321	0.46705717	0.566107703	0.722445223	0.581124207	0.177633097	0.47309909	0.633964394	0.447334498	0.41426465	0.260959312	0.841899644	0.691870047	0.851612722	0.679492828	0.664484599	0.67467282	0.287945746	0.308421802	0.67803757	0.357243223	0.018792114	0.22093748	0.423751504	0.690139536	0.24596584	0.802803669	0.517517259	0.434292374	0.725394216	0.665283207
SDHB	-0.019655337	0.915454604	0.458235322	0.849272509	0.854807014	0.782129466	0.759063489	0.904778572	0.798466534	0.721871259	0.703615995	0.750032797	0.766494408	0.578799295	0.794018546	0.121075224	0.369067285	0.648243082	0.724540957	0.478046467	0.604282218	0.746042694	0.573642693	0.168535631	0.49850477	0.607666993	0.428750098	0.418268189	0.233898921	0.886749363	0.708014604	0.893846401	0.72201866	0.668745694	0.676855708	0.283414553	0.310222832	0.691137815	0.369606758	-0.004464947	0.235569105	0.448528609	0.713256017	0.29282002	0.787035163	0.502387342	0.460994697	0.762684112	0.633102266
COX7C	-0.023321424	0.842554535	0.430752045	0.825414202	0.769967639	0.729364887	0.635982892	0.870378046	0.787341997	0.588054441	0.62338554	0.609821555	0.65014898	0.508213075	0.685714773	0.101534239	0.3451723	0.547869055	0.609227467	0.40949688	0.52717781	0.663723969	0.557818048	0.130109955	0.399943359	0.57459209	0.382116754	0.351866626	0.202776722	0.795664291	0.567666825	0.836121462	0.580938099	0.585655441	0.607433467	0.345328406	0.267757651	0.600204084	0.327446828	0.003534514	0.194578227	0.327250365	0.633409855	0.212967243	0.694938564	0.439475126	0.420927231	0.678815312	0.607701269
NDUFB7	-0.026777591	0.754585886	0.309560073	0.709608934	0.772686602	0.531624973	0.571322899	0.760673232	0.713454178	0.474582259	0.511081655	0.519598997	0.503308504	0.432833455	0.56857602	0.142823284	0.240954829	0.392379939	0.455918711	0.326253483	0.447613897	0.496713323	0.409755103	0.09836492	0.395327968	0.509282217	0.402416604	0.316875485	0.212330563	0.703386052	0.464123816	0.759887852	0.558691406	0.464967793	0.545327213	0.209550191	0.216301465	0.541710475	0.336062118	0.013913123	0.226811938	0.254270044	0.550450147	0.235305129	0.587232064	0.413004545	0.333814352	0.577893892	0.424372943
ADPGK	-0.032594624	0.844916704	0.512618442	0.783288569	0.816013182	0.758919596	0.889309031	0.781632115	0.720276361	0.738025249	0.773651968	0.766076231	0.80852015	0.587868349	0.802785395	0.145460268	0.554419817	0.709144765	0.729126273	0.483566737	0.613053975	0.767069878	0.628479104	0.148176975	0.444526683	0.456447447	0.39559364	0.433543989	0.257942181	1	0.708490088	0.91208801	0.760285768	0.704553377	0.642319773	0.319854747	0.41550304	0.644823195	0.332581795	0.024873039	0.176789346	0.532731051	0.786591059	0.343228208	0.766012725	0.481285153	0.536480908	0.722837659	0.651527111
PPA2	-0.036928464	0.877972035	0.423595368	0.862123356	0.782556563	0.793372543	0.684881059	0.872296928	0.816726821	0.650829543	0.68043163	0.658600929	0.695526596	0.51047918	0.72681051	0.096811559	0.330375831	0.60399719	0.679737389	0.41973905	0.605231392	0.711653791	0.592136834	0.235762143	0.419048306	0.58530317	0.398607777	0.413613013	0.210019299	0.834829217	0.635055684	0.866384128	0.621611395	0.64005391	0.61474001	0.377847209	0.306605819	0.648711442	0.318130307	-0.009866173	0.163502711	0.398624812	0.626684591	0.225800345	0.75071141	0.423827732	0.480041178	0.707018139	0.619738057
NDUFA6	-0.041163941	0.844802008	0.391301715	0.7890495	0.766383523	0.689210081	0.675221036	0.818414617	0.768439762	0.590209751	0.613059414	0.607530355	0.644251038	0.48976104	0.657388733	0.08374704	0.310214106	0.519108583	0.598518079	0.431253433	0.563195787	0.633269581	0.528911032	0.172309928	0.437818715	0.554633711	0.362662723	0.409620583	0.170662794	0.813097644	0.613218605	0.838130967	0.594644337	0.58138778	0.577021211	0.267748136	0.294443011	0.633518322	0.266800446	0.021098452	0.150021178	0.386800906	0.593356883	0.24058501	0.691989654	0.378659805	0.385451075	0.638891705	0.501497405
SDHD	-0.041446513	0.861722192	0.409357168	0.892364096	0.741686451	0.724947496	0.627734964	0.889506212	0.755647162	0.623519142	0.65105338	0.621867384	0.687259112	0.531018485	0.685188759	0.10617214	0.337688742	0.514621173	0.664478893	0.398798648	0.545695909	0.644473551	0.614396521	0.149120126	0.47722226	0.683953996	0.394840092	0.388776738	0.226603178	0.807400185	0.646809491	0.815910028	0.579653524	0.599344206	0.64478025	0.310068724	0.27469568	0.630568989	0.334573688	0.009996605	0.228416369	0.412779867	0.623503067	0.200308252	0.737810472	0.416595881	0.359261067	0.641734108	0.590039465
NDUFA3	-0.043906006	0.820062645	0.441854579	0.795674522	0.837820408	0.679955494	0.736100405	0.832813435	0.771597158	0.628027873	0.65030343	0.674307577	0.68340909	0.549848353	0.741401597	0.177109623	0.36838125	0.570284938	0.639872515	0.411720655	0.543891735	0.69392816	0.539120282	0.105126012	0.432906755	0.52713204	0.466305889	0.375078457	0.292294451	0.845437275	0.590738584	0.873378548	0.685640786	0.623292448	0.655962734	0.256538395	0.284083533	0.621987266	0.386049595	0.047486981	0.204625412	0.386566985	0.683146937	0.302256341	0.716698126	0.516419394	0.527932822	0.725058903	0.624171421
NDUFA7	-0.044368787	0.814271771	0.473301616	0.802058684	0.819316114	0.668426935	0.726897743	0.819001659	0.705447098	0.605856511	0.612981962	0.648745383	0.682480634	0.534648354	0.729218683	0.283219192	0.403522895	0.531622839	0.645901808	0.496231112	0.490594731	0.643785641	0.530409571	0.095389729	0.405482843	0.499771669	0.47438327	0.327036572	0.386214883	0.814213236	0.62263427	0.789258809	0.67693068	0.599150653	0.673088583	0.18435891	0.280834384	0.611974593	0.412507347	0.111472968	0.262262565	0.329031732	0.670435449	0.294808874	0.755685887	0.607630934	0.456328324	0.671851247	0.617786041
NDUFB3	-0.047393019	0.75945537	0.368002167	0.822136825	0.665764138	0.654370669	0.562211312	0.775317992	0.752128261	0.489017302	0.537829881	0.481133875	0.549413802	0.398355071	0.56997434	0.157206237	0.258577143	0.453853986	0.537409843	0.353561855	0.487185745	0.548166073	0.551561368	0.200935063	0.360141477	0.518285738	0.395134425	0.315557728	0.237106642	0.764037173	0.521163212	0.780735433	0.453399358	0.500502502	0.577917345	0.266707682	0.247596034	0.54594778	0.305684541	0.04245628	0.176112261	0.304786056	0.511789693	0.2273392	0.644785715	0.357424039	0.366779488	0.528037722	0.474137011
NDUFA11	-0.047740822	0.810135476	0.339503958	0.722761646	0.846604188	0.610449554	0.700565909	0.794320612	0.700924836	0.53508786	0.562687784	0.595368154	0.594480934	0.509651833	0.648927931	0.095521982	0.35675246	0.471172303	0.523706778	0.425589731	0.492288669	0.565425069	0.492775508	0.156006775	0.403316258	0.505072526	0.355419865	0.348641071	0.185319019	0.80254474	0.565120306	0.841095988	0.691470374	0.554373071	0.549418885	0.202152125	0.2759451	0.615455046	0.314244898	-0.002249176	0.197056574	0.349203932	0.614499803	0.264709404	0.629323602	0.401477465	0.42821297	0.682163134	0.480612221
NDUFB9	-0.051861261	0.822719442	0.408883048	0.766726255	0.755013764	0.663220289	0.613503886	0.83900658	0.784900518	0.533085491	0.562844324	0.567873771	0.600277082	0.446339741	0.637367184	0.099646274	0.273473343	0.54446387	0.566738341	0.446174899	0.527611321	0.61540725	0.460150997	0.115970689	0.394310111	0.522332368	0.407357413	0.334860329	0.201022548	0.778545014	0.559948405	0.799212116	0.554944381	0.513783527	0.586219923	0.274473206	0.259773547	0.576567495	0.335185957	-0.014861878	0.199315233	0.268140017	0.598719225	0.289126533	0.672366551	0.420160315	0.374996641	0.628805345	0.503563716
ATP4B	-0.055528335	0.33817538	0.457517114	0.412646362	0.418578305	0.281151163	0.411532695	0.381974296	0.251683334	0.361103399	0.394345791	0.421946475	0.442967987	0.418342698	0.442243524	0.457892277	0.338419974	0.305153794	0.364778156	0.311728458	0.141490341	0.377392837	0.224431078	0.247486567	0.307083879	0.258268136	0.407147506	0.121698574	0.419702381	0.421348954	0.329856414	0.391057882	0.427019482	0.343430737	0.519840795	0.045365389	0.071011368	0.188169104	0.370910386	0.033263938	0.332870758	0.306748613	0.439369819	0.191051399	0.429800116	0.505515486	0.425889148	0.336490866	0.431347367
CPT1B	-0.058070145	0.311143807	0.253043383	0.306104899	0.435997358	0.284855831	0.681312833	0.215849641	0.205187221	0.324718692	0.360581844	0.377649458	0.409405849	0.431987366	0.407451785	0.122883079	0.576546681	0.272776655	0.300490736	0.351542459	0.212677851	0.337107318	0.427897267	0.010350779	0.192264724	0.096140719	0.144534736	0.201395023	0.181961392	0.588921699	0.365069772	0.500883132	0.533042829	0.389916808	0.271369221	0.050729978	0.248063078	0.249128095	0.102450441	0.108660428	0.014789801	0.428040304	0.346918226	0.169760601	0.319370386	0.164419504	0.465151527	0.330722039	0.364844052
ALDH3A1	-0.063659316	0.206751332	-0.031215614	0.160000641	0.254565265	0.084581405	0.262536639	0.1760422	0.195367145	0.097710349	0.113613619	0.129803905	0.151686607	0.021852562	0.178459204	0.230313276	0.126966573	0.254918562	0.180502257	0.229343865	0.127832629	0.113815098	0.00882586	0.027422038	-0.009867115	-0.059142358	0.506350147	0.125377338	0.349740733	0.343228208	0.064245437	0.298825455	0.207608305	0.061382523	0.355582628	-0.006140474	0.111746076	0.051539555	0.290053696	0.141598478	0.116843139	-0.006461424	0.198317866	1	0.157294996	0.252908845	0.384115948	0.157065091	0.119503799
COX7B	-0.06500418	0.747820817	0.327736342	0.737797092	0.648462804	0.599174535	0.540811039	0.735814763	0.74824836	0.433172955	0.479181325	0.445460935	0.490625289	0.344464295	0.521264152	0.090388414	0.226905048	0.432856639	0.46603791	0.388237598	0.481917883	0.494445842	0.456660768	0.167753827	0.331972823	0.456902274	0.357891398	0.316108592	0.165072395	0.734973489	0.503026581	0.745237021	0.435295756	0.439585588	0.505744197	0.245592574	0.25382612	0.532762174	0.255062034	0.024728203	0.122766746	0.252531666	0.475171909	0.264640394	0.588437019	0.296063649	0.303919686	0.491989799	0.367489938
NDUFA2	-0.066894628	0.740632668	0.342676936	0.74969186	0.715078297	0.57276009	0.520171106	0.764484899	0.710915538	0.417349937	0.467042638	0.450625798	0.493291882	0.394364623	0.524572849	0.116692107	0.231957956	0.413698473	0.456579862	0.361528266	0.448201988	0.488093144	0.457210209	0.117643623	0.3579781	0.492498075	0.389976567	0.296144499	0.210540158	0.719363131	0.471975775	0.751833672	0.481721695	0.414484905	0.559810522	0.223348317	0.168127472	0.47854609	0.308602898	0.019907916	0.192128883	0.211691156	0.525018778	0.259359589	0.589394781	0.369159846	0.350084569	0.532821455	0.442585575
NDUFV2	-0.067173515	0.757816508	0.442841811	0.801888038	0.680025747	0.671468837	0.612205765	0.765351296	0.706342525	0.450654058	0.496074825	0.472357888	0.562819797	0.418910818	0.59473992	0.180874279	0.296080433	0.533088992	0.592945075	0.439183903	0.568597542	0.591417698	0.494908268	0.24774695	0.280449697	0.435346553	0.412701628	0.247626422	0.287374986	0.776708399	0.601246816	0.740878979	0.483633852	0.471427591	0.607350782	0.220281847	0.290411854	0.533207831	0.355366276	0.053876741	0.198034144	0.225883453	0.533001844	0.289106207	0.695431352	0.426796547	0.414945092	0.529824412	0.508348995
NDUFB5	-0.067218451	0.758931893	0.367796874	0.844994149	0.653661071	0.646705754	0.49652425	0.819287351	0.684175993	0.455226388	0.516280606	0.453876282	0.558767288	0.428945412	0.550590222	0.153057287	0.25782339	0.423694876	0.541490673	0.350645755	0.45128196	0.516645567	0.534661973	0.197681728	0.37371841	0.585384511	0.438235408	0.318713745	0.26671493	0.724615653	0.515898132	0.74905906	0.435262804	0.467903551	0.634322051	0.285500099	0.209143876	0.507841098	0.361622212	0.050582155	0.249254054	0.272012049	0.529445538	0.243091531	0.650346401	0.388109564	0.372719533	0.535433233	0.511175112
ACADL	-0.068848706	0.466458439	1	0.511508891	0.405972673	0.519440182	0.432004244	0.543635781	0.443452657	0.436338711	0.390431413	0.4732136	0.601279694	0.502539873	0.491580443	0.099858252	0.395301975	0.61364916	0.585228487	0.432520702	0.434359797	0.633881848	0.188282946	0.028543189	0.350453372	0.322546001	0.174510595	0.054238818	0.185083869	0.512618442	0.597685859	0.328179961	0.296041426	0.297868728	0.470247024	0.156270447	0.026137022	0.177012986	0.206655727	0.010358319	0.193423583	0.104610762	0.610436529	-0.031215614	0.649461283	0.478070585	0.194922367	0.367004747	0.595774048
IDH1	-0.069132889	0.635366175	0.208311453	0.63344259	0.596466085	0.747115812	0.561447483	0.614698069	0.632736627	0.536760052	0.546632163	0.506955832	0.53288749	0.332242723	0.563282999	0.005056304	0.214453522	0.508087137	0.485633158	0.240007151	0.366156442	0.554433934	0.51867167	0.416516589	0.247066143	0.341087732	0.280537156	0.362941099	0.089365625	0.718246851	0.362003718	0.829656836	0.548413913	0.570520118	0.453501173	0.34238225	0.205835357	0.508296109	0.220454746	-0.006965877	0.107972939	0.439999797	0.44687052	0.279251462	0.520068964	0.229136318	0.609029671	0.674720625	0.48338625
COX17	-0.069545024	0.715285929	0.504390305	0.768625738	0.66480984	0.628256345	0.591391882	0.763913609	0.766425724	0.486681045	0.507207049	0.503541572	0.572565194	0.428207552	0.591362461	0.127788167	0.30422584	0.555700916	0.597047856	0.424968329	0.582180151	0.61109877	0.493346982	0.10047537	0.356868377	0.467874123	0.379390245	0.266532575	0.236221305	0.766708722	0.596511482	0.704424775	0.452699695	0.457741307	0.590587027	0.251412494	0.272845467	0.508050384	0.325355991	0.03747186	0.17776284	0.239042403	0.57880754	0.241226803	0.657295547	0.419577409	0.355843203	0.518095418	0.525469879
NDUFB6	-0.071344625	0.782154557	0.409074089	0.795990768	0.696690671	0.623992075	0.552745141	0.805643141	0.735882702	0.488667514	0.527440991	0.502489461	0.56295858	0.442653435	0.579562054	0.108354356	0.255853207	0.471449035	0.53738319	0.419286229	0.508028127	0.547894323	0.466972046	0.112886114	0.39457444	0.546478465	0.371864534	0.311043946	0.194559661	0.74335335	0.559330588	0.746652168	0.473807119	0.469726481	0.573484545	0.253372587	0.2382954	0.534420667	0.302096947	0.013746882	0.201641861	0.266613955	0.549157334	0.217233012	0.654838892	0.37128294	0.28005909	0.529387123	0.461039474
NDUFA4	-0.07479201	0.738969681	0.317676593	0.744513739	0.654908577	0.561157964	0.483495713	0.754618194	0.723435847	0.405484612	0.469718397	0.424000357	0.469832812	0.35713048	0.496521872	0.085816856	0.181793951	0.400539412	0.443998264	0.336704991	0.468653003	0.46472127	0.435057506	0.125761236	0.36042044	0.509672545	0.368792358	0.295486547	0.169788102	0.690679443	0.467357873	0.7172063	0.416571715	0.401891434	0.535644737	0.237117119	0.197610644	0.489734578	0.293207599	0.013080011	0.183132078	0.215655748	0.478924843	0.237973955	0.574503064	0.316397683	0.282056158	0.484512608	0.379181553
PPARG	-0.075879133	0.668815902	0.405757452	0.563671988	0.663470856	0.490934097	0.675458284	0.62930453	0.573349158	0.51491308	0.645537552	0.560485308	0.634433147	0.411308881	0.566885148	0.058295718	0.472655375	0.560699797	0.477515736	0.386235643	0.406687551	0.532645098	0.333242329	-0.068882696	0.354419737	0.322250366	0.366554955	0.360756467	0.141210424	0.836104608	0.510426284	0.749244334	0.588535998	0.431628671	0.544353179	0.236711385	0.221502722	0.385146202	0.311941127	-0.008778014	0.202377022	0.336446091	0.737385379	0.458177082	0.54459032	0.372855122	0.402119834	0.512571729	0.474984122
ATP4A	-0.081038401	0.035431897	-0.042642927	0.147195388	0.053532798	0.074213511	0.106367938	0.037966092	0.079905825	0.073757146	0.034501858	0.046889323	0.008720103	0.020856581	0.031132175	0.000226408	0.249473219	0.013071926	0.010807795	-0.018838646	-0.03446997	0.027824629	0.487804368	-0.032273314	-0.04673218	-0.037345655	-0.077005628	-0.020659052	0.028834588	0.227448466	-0.032387329	0.124281872	0.117045686	0.107670339	-0.049104528	-0.02268889	-0.025530558	0.001439905	-0.038227805	-0.044953771	-0.072672596	0.062264273	0.004031371	-0.018126013	-0.034599802	-0.086133231	0.031740525	0.007304932	0.138555912
ACSL1	-0.092125368	0.645109126	0.61364916	0.531301445	0.544645316	0.70117738	0.655594099	0.609553418	0.684169336	0.628034655	0.60580666	0.669393154	0.692508692	0.3669676	0.666381803	-0.00513972	0.303543997	1	0.765622997	0.490498186	0.722581641	0.802919529	0.312487177	0.066116391	0.372810866	0.304389719	0.188343302	0.208791294	0.116239785	0.709144765	0.676932336	0.588716542	0.507637572	0.509554959	0.517394205	0.32291596	0.336815207	0.448964469	0.261916743	-0.054275596	0.153038155	0.307094862	0.639879821	0.254918562	0.59809854	0.372231468	0.430255645	0.594633843	0.556754524
NDUFB1	-0.101994449	0.705486292	0.348890948	0.737125037	0.634345859	0.574392468	0.523885594	0.727878601	0.725057524	0.387694199	0.448007836	0.400487251	0.47050077	0.338432611	0.492096471	0.118965646	0.246442292	0.431274629	0.447437817	0.383286916	0.45219896	0.4686625	0.476469609	0.157398386	0.327165855	0.443945983	0.381762379	0.299762349	0.211429208	0.742359412	0.475026583	0.734688032	0.40828912	0.391923977	0.542895918	0.250137063	0.213326486	0.46080687	0.306447577	0.037917249	0.17869992	0.208316387	0.493939239	0.294379401	0.560519325	0.314655677	0.347868584	0.464999931	0.392667647
ACSL3.AS1	-0.10594681	0.408365651	0.432520702	0.381972656	0.379523372	0.427238297	0.459769165	0.448910432	0.368797376	0.363808427	0.294555027	0.381163961	0.478838069	0.328719792	0.434589464	0.137425834	0.3839261	0.490498186	0.450830929	1	0.378193285	0.44664608	0.248207746	-0.064819765	0.321058093	0.225666991	0.256625918	0.300596652	0.173544044	0.483566737	0.520955765	0.37403922	0.336780573	0.350107136	0.404759851	0.245167	0.303414075	0.334093618	0.2369288	0.051289341	0.166510245	0.241603713	0.337694201	0.229343865	0.453441709	0.26788957	0.259189929	0.403540083	0.413002741
CYP4A43P	-0.13442791	0.196830163	0.25816549	0.258198914	0.121225516	0.164349337	0.153655172	0.182516984	0.294698841	0.114559998	0.087333048	0.110118908	0.164478875	0.106542536	0.144602156	0.004983481	0.216296628	0.144675998	0.146457322	0.254957106	0.268993455	0.151977817	0.149052356	-0.055639924	0.079139529	0.057671489	0.066536097	0.09115295	0.016329695	0.268372544	0.28951695	0.119617256	0.049987618	0.039474353	0.101779387	0.091907818	0.029731628	0.102432207	0.031903355	-0.11631057	-0.056915487	0.033071652	0.116056563	0.058740971	0.230127909	0.07809693	-0.015726465	0.017240379	0.173244566
PDC	-0.150112614	0.266857274	0.340137252	0.362873934	0.313854883	0.217312925	0.505520601	0.221097507	0.245534001	0.336980445	0.362836446	0.350136806	0.426285059	0.417734892	0.42709315	0.217398193	0.461341278	0.340930611	0.37236881	0.339892897	0.347984739	0.395399883	0.319318326	-0.05418648	0.237628329	0.144243856	0.224164823	0.165393086	0.36534655	0.466072251	0.349060098	0.385478328	0.382659222	0.416956166	0.315631793	0.159319338	0.241154712	0.229355208	0.209363885	0.065695366	0.100213521	0.389650723	0.238594233	0.191845344	0.40145738	0.220368537	0.357509571	0.297103967	0.421942501
[truncated: 139 more columns]
