# Supplementary material for: Comprehensive Analysis of Alteration Landscape and Its Clinical Significance of Mitochondrial Energy Metabolism Pathway-Related Genes in Lung Cancers
Source: Oxid Med Cell Longev. 2021 Dec 20;2021:9259297. doi: 10.1155/2021/9259297 (PMC8713050; doi:10.1155/2021/9259297)
Supplement: Supplementary 14 — Supplementary Table 5: functional characteristics analysis of 43 differentially expressed MMRGs using GO enrichments. [file 9259297.f14.txt]

Supplmentary Table 5. Functional characteristics analysis of 43 differentially expressed MMRGs using GO enrichments
ID	Description	GeneRatio	BgRatio	pvalue	p.adjust	qvalue	geneID	Count	GO
GO:0044282	small molecule catabolic process	19/39	431/18862	2.01E-21	1.92E-18	1.18E-18	2821/5313/33/217/221/1579/10449/5208/160428/64064/26330/64577/127/10840/5214/1375/5471/2597/222	19	BP
GO:0006067	ethanol metabolic process	7/39	22/18862	1.52E-14	7.28E-12	4.47E-12	125/124/217/221/127/126/222	7	BP
GO:0006631	fatty acid metabolic process	12/39	392/18862	1.29E-11	3.63E-09	2.23E-09	33/5468/1579/23205/2182/113612/284541/2180/10891/10449/127/1375	12	BP
GO:0034308	primary alcohol metabolic process	8/39	94/18862	1.52E-11	3.63E-09	2.23E-09	125/124/8854/217/221/127/126/222	8	BP
GO:0006069	ethanol oxidation	5/39	12/18862	2.27E-11	4.33E-09	2.66E-09	125/124/217/127/126	5	BP
GO:0006007	glucose catabolic process	6/39	36/18862	9.72E-11	1.55E-08	9.50E-09	2821/5313/5208/26330/5214/2597	6	BP
GO:0006734	NADH metabolic process	6/39	43/18862	3.01E-10	4.11E-08	2.52E-08	2821/5313/130752/26330/5214/2597	6	BP
GO:0009150	purine ribonucleotide metabolic process	11/39	408/18862	4.13E-10	4.93E-08	3.02E-08	2821/5313/23205/2182/2180/10891/5208/26330/5214/5471/2597	11	BP
GO:0009259	ribonucleotide metabolic process	11/39	425/18862	6.35E-10	6.32E-08	3.88E-08	2821/5313/23205/2182/2180/10891/5208/26330/5214/5471/2597	11	BP
GO:0006090	pyruvate metabolic process	8/39	150/18862	6.62E-10	6.32E-08	3.88E-08	2821/5313/10891/5208/26330/5091/5214/2597	8	BP
GO:0019693	ribose phosphate metabolic process	11/39	435/18862	8.11E-10	7.04E-08	4.32E-08	2821/5313/23205/2182/2180/10891/5208/26330/5214/5471/2597	11	BP
GO:0006163	purine nucleotide metabolic process	11/39	441/18862	9.37E-10	7.46E-08	4.58E-08	2821/5313/23205/2182/2180/10891/5208/26330/5214/5471/2597	11	BP
GO:0072521	purine-containing compound metabolic process	11/39	460/18862	1.46E-09	1.07E-07	6.58E-08	2821/5313/23205/2182/2180/10891/5208/26330/5214/5471/2597	11	BP
GO:0019320	hexose catabolic process	6/39	56/18862	1.57E-09	1.07E-07	6.59E-08	2821/5313/5208/26330/5214/2597	6	BP
GO:0006735	NADH regeneration	5/39	27/18862	2.26E-09	1.27E-07	7.80E-08	2821/5313/26330/5214/2597	5	BP
GO:0061621	canonical glycolysis	5/39	27/18862	2.26E-09	1.27E-07	7.80E-08	2821/5313/26330/5214/2597	5	BP
GO:0061718	glucose catabolic process to pyruvate	5/39	27/18862	2.26E-09	1.27E-07	7.80E-08	2821/5313/26330/5214/2597	5	BP
GO:0061620	glycolytic process through glucose-6-phosphate	5/39	28/18862	2.75E-09	1.42E-07	8.69E-08	2821/5313/26330/5214/2597	5	BP
GO:0046365	monosaccharide catabolic process	6/39	62/18862	2.95E-09	1.42E-07	8.69E-08	2821/5313/5208/26330/5214/2597	6	BP
GO:0006066	alcohol metabolic process	10/39	373/18862	3.09E-09	1.42E-07	8.69E-08	125/33/124/8854/217/221/10449/127/126/222	10	BP
GO:0006096	glycolytic process	7/39	114/18862	3.21E-09	1.42E-07	8.69E-08	2821/5313/10891/5208/26330/5214/2597	7	BP
GO:0061615	glycolytic process through fructose-6-phosphate	5/39	29/18862	3.32E-09	1.42E-07	8.69E-08	2821/5313/26330/5214/2597	5	BP
GO:0006757	ATP generation from ADP	7/39	115/18862	3.41E-09	1.42E-07	8.69E-08	2821/5313/10891/5208/26330/5214/2597	7	BP
GO:0120254	olefinic compound metabolic process	7/39	119/18862	4.33E-09	1.72E-07	1.06E-07	8854/1579/113612/284541/2180/10891/64577	7	BP
GO:0001676	long-chain fatty acid metabolic process	7/39	120/18862	4.59E-09	1.75E-07	1.08E-07	33/1579/23205/2182/113612/284541/2180	7	BP
GO:0046031	ADP metabolic process	7/39	122/18862	5.16E-09	1.89E-07	1.16E-07	2821/5313/10891/5208/26330/5214/2597	7	BP
GO:0042573	retinoic acid metabolic process	5/39	33/18862	6.59E-09	2.33E-07	1.43E-07	125/124/8854/64577/126	5	BP
GO:0006165	nucleoside diphosphate phosphorylation	7/39	132/18862	8.94E-09	3.01E-07	1.85E-07	2821/5313/10891/5208/26330/5214/2597	7	BP
GO:0046939	nucleotide phosphorylation	7/39	133/18862	9.42E-09	3.01E-07	1.85E-07	2821/5313/10891/5208/26330/5214/2597	7	BP
GO:0006006	glucose metabolic process	8/39	210/18862	9.45E-09	3.01E-07	1.85E-07	2821/5313/10891/5208/26330/5091/5214/2597	8	BP
GO:0009135	purine nucleoside diphosphate metabolic process	7/39	135/18862	1.05E-08	3.12E-07	1.92E-07	2821/5313/10891/5208/26330/5214/2597	7	BP
GO:0009179	purine ribonucleoside diphosphate metabolic process	7/39	135/18862	1.05E-08	3.12E-07	1.92E-07	2821/5313/10891/5208/26330/5214/2597	7	BP
GO:0034754	cellular hormone metabolic process	7/39	136/18862	1.10E-08	3.18E-07	1.96E-07	125/124/8854/10891/64577/127/126	7	BP
GO:0046034	ATP metabolic process	9/39	313/18862	1.16E-08	3.27E-07	2.01E-07	2821/5313/10891/5208/1537/4726/26330/5214/2597	9	BP
GO:0009185	ribonucleoside diphosphate metabolic process	7/39	138/18862	1.22E-08	3.32E-07	2.04E-07	2821/5313/10891/5208/26330/5214/2597	7	BP
GO:0009132	nucleoside diphosphate metabolic process	7/39	156/18862	2.85E-08	7.56E-07	4.64E-07	2821/5313/10891/5208/26330/5214/2597	7	BP
GO:0046395	carboxylic acid catabolic process	8/39	243/18862	2.95E-08	7.61E-07	4.67E-07	33/1579/10449/160428/64577/10840/1375/5471	8	BP
GO:0019318	hexose metabolic process	8/39	250/18862	3.67E-08	9.23E-07	5.67E-07	2821/5313/10891/5208/26330/5091/5214/2597	8	BP
GO:0042572	retinol metabolic process	5/39	47/18862	4.17E-08	1.02E-06	6.27E-07	125/124/8854/127/126	5	BP
GO:0016054	organic acid catabolic process	8/39	258/18862	4.69E-08	1.12E-06	6.87E-07	33/1579/10449/160428/64577/10840/1375/5471	8	BP
GO:0019674	NAD metabolic process	5/39	51/18862	6.35E-08	1.48E-06	9.08E-07	2821/5313/26330/5214/2597	5	BP
GO:0005996	monosaccharide metabolic process	8/39	272/18862	7.05E-08	1.60E-06	9.84E-07	2821/5313/10891/5208/26330/5091/5214/2597	8	BP
GO:0019395	fatty acid oxidation	6/39	105/18862	7.24E-08	1.61E-06	9.87E-07	33/5468/10891/10449/127/1375	6	BP
GO:0001523	retinoid metabolic process	6/39	108/18862	8.57E-08	1.86E-06	1.14E-06	125/124/8854/64577/127/126	6	BP
GO:0034440	lipid oxidation	6/39	110/18862	9.56E-08	2.03E-06	1.25E-06	33/5468/10891/10449/127/1375	6	BP
GO:0016101	diterpenoid metabolic process	6/39	114/18862	1.18E-07	2.46E-06	1.51E-06	125/124/8854/64577/127/126	6	BP
GO:0016052	carbohydrate catabolic process	7/39	197/18862	1.41E-07	2.87E-06	1.76E-06	2821/5313/10891/5208/26330/5214/2597	7	BP
GO:0006081	cellular aldehyde metabolic process	5/39	63/18862	1.87E-07	3.71E-06	2.28E-06	8854/221/64577/127/218	5	BP
GO:0006721	terpenoid metabolic process	6/39	124/18862	1.95E-07	3.81E-06	2.34E-06	125/124/8854/64577/127/126	6	BP
GO:0042445	hormone metabolic process	7/39	218/18862	2.81E-07	5.37E-06	3.30E-06	125/124/8854/10891/64577/127/126	7	BP
GO:0046394	carboxylic acid biosynthetic process	8/39	327/18862	2.89E-07	5.40E-06	3.32E-06	5313/33/8854/1579/23205/284541/5832/64577	8	BP
GO:0016053	organic acid biosynthetic process	8/39	335/18862	3.47E-07	6.37E-06	3.91E-06	5313/33/8854/1579/23205/284541/5832/64577	8	BP
GO:0006720	isoprenoid metabolic process	6/39	143/18862	4.54E-07	8.18E-06	5.02E-06	125/124/8854/64577/127/126	6	BP
GO:1901616	organic hydroxy compound catabolic process	5/39	77/18862	5.13E-07	9.08E-06	5.57E-06	217/221/1579/127/222	5	BP
GO:1901568	fatty acid derivative metabolic process	5/39	82/18862	7.04E-07	1.22E-05	7.50E-06	1579/23205/2182/2180/64064	5	BP
GO:0006094	gluconeogenesis	5/39	88/18862	1.00E-06	1.71E-05	1.05E-05	2821/10891/26330/5091/2597	5	BP
GO:0007584	response to nutrient	6/39	165/18862	1.05E-06	1.76E-05	1.08E-05	5313/5468/8854/2182/2180/218	6	BP
GO:0019319	hexose biosynthetic process	5/39	91/18862	1.18E-06	1.92E-05	1.18E-05	2821/10891/26330/5091/2597	5	BP
GO:0030258	lipid modification	7/39	270/18862	1.18E-06	1.92E-05	1.18E-05	33/5468/284541/10891/10449/127/1375	7	BP
GO:0009152	purine ribonucleotide biosynthetic process	6/39	175/18862	1.48E-06	2.36E-05	1.45E-05	5313/23205/2182/2180/10891/5471	6	BP
GO:0046364	monosaccharide biosynthetic process	5/39	97/18862	1.62E-06	2.54E-05	1.56E-05	2821/10891/26330/5091/2597	5	BP
GO:0009260	ribonucleotide biosynthetic process	6/39	188/18862	2.25E-06	3.39E-05	2.08E-05	5313/23205/2182/2180/10891/5471	6	BP
GO:0006068	ethanol catabolic process	3/39	13/18862	2.30E-06	3.39E-05	2.08E-05	217/221/222	3	BP
GO:0010248	establishment or maintenance of transmembrane electrochemical gradient	3/39	13/18862	2.30E-06	3.39E-05	2.08E-05	496/479/495	3	BP
GO:0030007	cellular potassium ion homeostasis	3/39	13/18862	2.30E-06	3.39E-05	2.08E-05	496/479/495	3	BP
GO:0046390	ribose phosphate biosynthetic process	6/39	195/18862	2.78E-06	4.02E-05	2.47E-05	5313/23205/2182/2180/10891/5471	6	BP
GO:0006164	purine nucleotide biosynthetic process	6/39	197/18862	2.95E-06	4.20E-05	2.58E-05	5313/23205/2182/2180/10891/5471	6	BP
GO:0036376	sodium ion export across plasma membrane	3/39	15/18862	3.66E-06	5.13E-05	3.15E-05	496/479/495	3	BP
GO:0072522	purine-containing compound biosynthetic process	6/39	208/18862	4.03E-06	5.58E-05	3.42E-05	5313/23205/2182/2180/10891/5471	6	BP
GO:0034310	primary alcohol catabolic process	3/39	16/18862	4.49E-06	6.13E-05	3.76E-05	217/221/222	3	BP
GO:0055078	sodium ion homeostasis	4/39	54/18862	4.58E-06	6.16E-05	3.78E-05	496/1579/479/495	4	BP
GO:0046164	alcohol catabolic process	4/39	55/18862	4.93E-06	6.54E-05	4.02E-05	217/221/127/222	4	BP
GO:0006883	cellular sodium ion homeostasis	3/39	19/18862	7.74E-06	9.99E-05	6.13E-05	496/479/495	3	BP
GO:0035338	long-chain fatty-acyl-CoA biosynthetic process	3/39	19/18862	7.74E-06	9.99E-05	6.13E-05	23205/2182/2180	3	BP
GO:0043651	linoleic acid metabolic process	3/39	21/18862	1.06E-05	0.000134882	8.28E-05	1579/284541/2180	3	BP
GO:0015908	fatty acid transport	5/39	150/18862	1.38E-05	0.000173073	0.000106257	5468/1579/2182/2180/1375	5	BP
GO:0009165	nucleotide biosynthetic process	6/39	264/18862	1.57E-05	0.000195057	0.000119754	5313/23205/2182/2180/10891/5471	6	BP
GO:1901293	nucleoside phosphate biosynthetic process	6/39	267/18862	1.68E-05	0.000205267	0.000126023	5313/23205/2182/2180/10891/5471	6	BP
GO:0035336	long-chain fatty-acyl-CoA metabolic process	3/39	25/18862	1.82E-05	0.000220181	0.000135178	23205/2182/2180	3	BP
GO:0055075	potassium ion homeostasis	3/39	29/18862	2.88E-05	0.000343456	0.000210862	496/479/495	3	BP
GO:0031667	response to nutrient levels	7/39	451/18862	3.38E-05	0.000398845	0.000244868	5313/5468/8854/2182/2180/10891/218	7	BP
GO:0046949	fatty-acyl-CoA biosynthetic process	3/39	31/18862	3.53E-05	0.000411022	0.000252344	23205/2182/2180	3	BP
GO:0042219	cellular modified amino acid catabolic process	3/39	32/18862	3.89E-05	0.000447437	0.000274701	33/160428/10840	3	BP
GO:0046320	regulation of fatty acid oxidation	3/39	33/18862	4.27E-05	0.000485626	0.000298147	33/5468/10891	3	BP
GO:0043648	dicarboxylic acid metabolic process	4/39	96/18862	4.52E-05	0.000507926	0.000311838	130752/160428/5832/10840	4	BP
GO:0009991	response to extracellular stimulus	7/39	477/18862	4.83E-05	0.000536228	0.000329214	5313/5468/8854/2182/2180/10891/218	7	BP
GO:0016051	carbohydrate biosynthetic process	5/39	209/18862	6.75E-05	0.000740596	0.000454684	2821/10891/26330/5091/2597	5	BP
GO:1903580	positive regulation of ATP metabolic process	3/39	41/18862	8.25E-05	0.000895392	0.00054972	10891/5208/26330	3	BP
GO:0042493	response to drug	6/39	359/18862	8.75E-05	0.000938922	0.000576445	5468/113612/2180/10891/5471/218	6	BP
GO:0035337	fatty-acyl-CoA metabolic process	3/39	42/18862	8.87E-05	0.000941493	0.000578023	23205/2182/2180	3	BP
GO:0033559	unsaturated fatty acid metabolic process	4/39	115/18862	9.15E-05	0.000959919	0.000589336	1579/113612/284541/2180	4	BP
GO:0072330	monocarboxylic acid biosynthetic process	5/39	224/18862	9.36E-05	0.000971486	0.000596437	5313/33/8854/23205/64577	5	BP
GO:0045981	positive regulation of nucleotide metabolic process	3/39	46/18862	0.000116655	0.001185163	0.000727623	10891/5208/26330	3	BP
GO:1900544	positive regulation of purine nucleotide metabolic process	3/39	46/18862	0.000116655	0.001185163	0.000727623	10891/5208/26330	3	BP
GO:1990573	potassium ion import across plasma membrane	3/39	47/18862	0.000124431	0.001250854	0.000767954	496/479/495	3	BP
GO:0070839	metal ion export	3/39	48/18862	0.000132536	0.00131846	0.00080946	496/479/495	3	BP
GO:0006766	vitamin metabolic process	4/39	130/18862	0.000146982	0.001447086	0.000888429	8854/160428/10840/5091	4	BP
GO:0072329	monocarboxylic acid catabolic process	4/39	131/18862	0.000151386	0.001475244	0.000905716	33/1579/10449/1375	4	BP
GO:0042180	cellular ketone metabolic process	5/39	254/18862	0.000168608	0.001626467	0.000998558	33/5468/10891/64577/127	5	BP
GO:0035384	thioester biosynthetic process	3/39	53/18862	0.000178231	0.001685258	0.001034653	23205/2182/2180	3	BP
GO:0071616	acyl-CoA biosynthetic process	3/39	53/18862	0.000178231	0.001685258	0.001034653	23205/2182/2180	3	BP
GO:0062013	positive regulation of small molecule metabolic process	4/39	141/18862	0.000200852	0.001880529	0.001154538	5468/10891/5208/26330	4	BP
GO:0014074	response to purine-containing compound	4/39	144/18862	0.000217726	0.002018726	0.001239383	5313/5468/10891/218	4	BP
GO:0019369	arachidonic acid metabolic process	3/39	59/18862	0.000245226	0.002251838	0.001382501	1579/113612/284541	3	BP
GO:0140115	export across plasma membrane	3/39	60/18862	0.000257765	0.00234443	0.001439347	496/479/495	3	BP
GO:0046185	aldehyde catabolic process	2/39	12/18862	0.000271368	0.002444875	0.001501014	221/127	2	BP
GO:1901570	fatty acid derivative biosynthetic process	3/39	62/18862	0.000284069	0.002535384	0.001556582	23205/2182/2180	3	BP
GO:0009437	carnitine metabolic process	2/39	13/18862	0.000320289	0.002832185	0.001738801	33/1375	2	BP
GO:0055067	monovalent inorganic cation homeostasis	4/39	161/18862	0.000333248	0.002893199	0.00177626	496/1579/479/495	4	BP
GO:0098739	import across plasma membrane	4/39	161/18862	0.000333248	0.002893199	0.00177626	496/2180/479/495	4	BP
GO:0033866	nucleoside bisphosphate biosynthetic process	3/39	67/18862	0.000357259	0.00301931	0.001853685	23205/2182/2180	3	BP
GO:0034030	ribonucleoside bisphosphate biosynthetic process	3/39	67/18862	0.000357259	0.00301931	0.001853685	23205/2182/2180	3	BP
GO:0034033	purine nucleoside bisphosphate biosynthetic process	3/39	67/18862	0.000357259	0.00301931	0.001853685	23205/2182/2180	3	BP
GO:0051791	medium-chain fatty acid metabolic process	2/39	14/18862	0.000373182	0.003126222	0.001919323	1579/284541	2	BP
GO:0016114	terpenoid biosynthetic process	2/39	15/18862	0.000430033	0.003480351	0.002136738	8854/64577	2	BP
GO:0042574	retinal metabolic process	2/39	15/18862	0.000430033	0.003480351	0.002136738	8854/64577	2	BP
GO:0046321	positive regulation of fatty acid oxidation	2/39	15/18862	0.000430033	0.003480351	0.002136738	5468/10891	2	BP
GO:0071871	response to epinephrine	2/39	15/18862	0.000430033	0.003480351	0.002136738	5313/10891	2	BP
GO:0015909	long-chain fatty acid transport	3/39	72/18862	0.000441611	0.00354402	0.002175827	5468/2180/1375	3	BP
GO:0022900	electron transport chain	4/39	178/18862	0.000487279	0.003873862	0.002378331	217/10891/1537/4726	4	BP
GO:1901569	fatty acid derivative catabolic process	2/39	16/18862	0.000490824	0.003873862	0.002378331	1579/64064	2	BP
GO:0006635	fatty acid beta-oxidation	3/39	75/18862	0.00049786	0.003897183	0.002392649	33/10449/1375	3	BP
GO:0015849	organic acid transport	5/39	324/18862	0.000516963	0.00401382	0.002464258	5468/1579/2182/2180/1375	5	BP
GO:0006577	amino-acid betaine metabolic process	2/39	17/18862	0.000555541	0.004199822	0.002578452	33/1375	2	BP
GO:0031000	response to caffeine	2/39	17/18862	0.000555541	0.004199822	0.002578452	5468/10891	2	BP
GO:0043649	dicarboxylic acid catabolic process	2/39	17/18862	0.000555541	0.004199822	0.002578452	160428/10840	2	BP
GO:0045913	positive regulation of carbohydrate metabolic process	3/39	78/18862	0.00055851	0.004199822	0.002578452	10891/5208/26330	3	BP
GO:0006110	regulation of glycolytic process	3/39	79/18862	0.000579729	0.004325322	0.002655502	10891/5208/26330	3	BP
GO:0045333	cellular respiration	4/39	187/18862	0.000586667	0.004343153	0.00266645	130752/10891/1537/4726	4	BP
GO:0033189	response to vitamin A	2/39	18/18862	0.000624168	0.004585235	0.002815074	5468/8854	2	BP
GO:0006767	water-soluble vitamin metabolic process	3/39	84/18862	0.000693563	0.00504044	0.003094544	160428/10840/5091	3	BP
GO:0046653	tetrahydrofolate metabolic process	2/39	19/18862	0.000696689	0.00504044	0.003094544	160428/10840	2	BP
GO:0006575	cellular modified amino acid metabolic process	4/39	198/18862	0.000726773	0.005218556	0.003203897	33/160428/10840/1375	4	BP
GO:0046655	folic acid metabolic process	2/39	20/18862	0.000773089	0.0055097	0.003382643	160428/10840	2	BP
GO:0043470	regulation of carbohydrate catabolic process	3/39	90/18862	0.00084784	0.005997684	0.003682238	10891/5208/26330	3	BP
GO:0098659	inorganic cation import across plasma membrane	3/39	97/18862	0.001053493	0.007290476	0.004475938	496/479/495	3	BP
GO:0099587	inorganic ion import across plasma membrane	3/39	97/18862	0.001053493	0.007290476	0.004475938	496/479/495	3	BP
GO:0120162	positive regulation of cold-induced thermogenesis	3/39	97/18862	0.001053493	0.007290476	0.004475938	33/2180/10891	3	BP
GO:0019217	regulation of fatty acid metabolic process	3/39	98/18862	0.001085213	0.007455961	0.004577537	33/5468/10891	3	BP
GO:0045821	positive regulation of glycolytic process	2/39	24/18862	0.001117164	0.007605793	0.004669525	5208/26330	2	BP
GO:0070482	response to oxygen levels	5/39	385/18862	0.00112295	0.007605793	0.004669525	5313/5468/10891/10449/218	5	BP
GO:0098657	import into cell	4/39	230/18862	0.001267481	0.008524257	0.00523341	496/2180/479/495	4	BP
GO:0006637	acyl-CoA metabolic process	3/39	105/18862	0.001324263	0.008782436	0.005391917	23205/2182/2180	3	BP
GO:0035383	thioester metabolic process	3/39	105/18862	0.001324263	0.008782436	0.005391917	23205/2182/2180	3	BP
GO:0019216	regulation of lipid metabolic process	5/39	402/18862	0.001360105	0.008901733	0.005465159	33/5468/1579/2180/10891	5	BP
GO:0009062	fatty acid catabolic process	3/39	106/18862	0.001360893	0.008901733	0.005465159	33/10449/1375	3	BP
GO:0006760	folic acid-containing compound metabolic process	2/39	27/18862	0.00141519	0.009193919	0.005644545	160428/10840	2	BP
GO:0008299	isoprenoid biosynthetic process	2/39	28/18862	0.001522063	0.009821422	0.006029796	8854/64577	2	BP
GO:0030004	cellular monovalent inorganic cation homeostasis	3/39	115/18862	0.001719532	0.011021158	0.006766366	496/479/495	3	BP
GO:0022904	respiratory electron transport chain	3/39	117/18862	0.001806484	0.011501281	0.007061133	10891/1537/4726	3	BP
GO:2000193	positive regulation of fatty acid transport	2/39	31/18862	0.001865067	0.011795624	0.007241844	1579/2180	2	BP
GO:1903578	regulation of ATP metabolic process	3/39	119/18862	0.001896142	0.011913258	0.007314064	10891/5208/26330	3	BP
GO:0006805	xenobiotic metabolic process	3/39	120/18862	0.001941994	0.012042887	0.007393649	113612/2180/218	3	BP
GO:1900542	regulation of purine nucleotide metabolic process	3/39	120/18862	0.001941994	0.012042887	0.007393649	10891/5208/26330	3	BP
GO:0062012	regulation of small molecule metabolic process	5/39	437/18862	0.001962825	0.012093535	0.007424744	33/5468/10891/5208/26330	5	BP
GO:0048384	retinoic acid receptor signaling pathway	2/39	32/18862	0.001986813	0.012162859	0.007467305	5468/8854	2	BP
GO:0006140	regulation of nucleotide metabolic process	3/39	122/18862	0.002035766	0.012383166	0.007602561	10891/5208/26330	3	BP
GO:0006690	icosanoid metabolic process	3/39	123/18862	0.002083693	0.012594474	0.007732292	1579/113612/284541	3	BP
GO:0042558	pteridine-containing compound metabolic process	2/39	33/18862	0.002112238	0.012686714	0.007788922	160428/10840	2	BP
GO:0071466	cellular response to xenobiotic stimulus	3/39	125/18862	0.002181646	0.013021698	0.007994583	113612/2180/218	3	BP
GO:0000038	very long-chain fatty acid metabolic process	2/39	34/18862	0.002241329	0.013294842	0.008162278	23205/2180	2	BP
GO:0006869	lipid transport	5/39	461/18862	0.002476519	0.014599235	0.008963102	5468/1579/2182/2180/1375	5	BP
GO:0009410	response to xenobiotic stimulus	3/39	131/18862	0.002492554	0.014603615	0.00896579	113612/2180/218	3	BP
GO:0032892	positive regulation of organic acid transport	2/39	36/18862	0.002510448	0.014618768	0.008975093	1579/2180	2	BP
GO:0015980	energy derivation by oxidation of organic compounds	4/39	278/18862	0.00253149	0.01465196	0.008995471	130752/10891/1537/4726	4	BP
GO:0001822	kidney development	4/39	280/18862	0.002597849	0.014945458	0.009175663	8854/1579/284541/5471	4	BP
GO:0045923	positive regulation of fatty acid metabolic process	2/39	38/18862	0.00279405	0.01597795	0.009809555	5468/10891	2	BP
GO:0072001	renal system development	4/39	288/18862	0.002875291	0.016344662	0.010034695	8854/1579/284541/5471	4	BP
GO:0033865	nucleoside bisphosphate metabolic process	3/39	140/18862	0.00300818	0.016800072	0.01031429	23205/2182/2180	3	BP
GO:0033875	ribonucleoside bisphosphate metabolic process	3/39	140/18862	0.00300818	0.016800072	0.01031429	23205/2182/2180	3	BP
GO:0034032	purine nucleoside bisphosphate metabolic process	3/39	140/18862	0.00300818	0.016800072	0.01031429	23205/2182/2180	3	BP
GO:0006730	one-carbon metabolic process	2/39	40/18862	0.003092017	0.017167886	0.010540107	160428/10840	2	BP
GO:0106106	cold-induced thermogenesis	3/39	144/18862	0.003256863	0.017875309	0.010974425	33/2180/10891	3	BP
GO:0120161	regulation of cold-induced thermogenesis	3/39	144/18862	0.003256863	0.017875309	0.010974425	33/2180/10891	3	BP
GO:0019432	triglyceride biosynthetic process	2/39	42/18862	0.003404232	0.018577381	0.011405457	2182/2180	2	BP
GO:1990845	adaptive thermogenesis	3/39	153/18862	0.003861629	0.020953728	0.012864399	33/2180/10891	3	BP
GO:0017144	drug metabolic process	2/39	45/18862	0.003899014	0.021037055	0.012915558	124/113612	2	BP
GO:0010823	negative regulation of mitochondrion organization	2/39	46/18862	0.00407094	0.021753811	0.013355605	10891/10449	2	BP
GO:0032368	regulation of lipid transport	3/39	156/18862	0.004077416	0.021753811	0.013355605	5468/1579/2180	3	BP
GO:0001655	urogenital system development	4/39	320/18862	0.004189021	0.022225086	0.013644941	8854/1579/284541/5471	4	BP
GO:0009409	response to cold	2/39	47/18862	0.00424634	0.022404724	0.013755229	5468/10891	2	BP
GO:0043467	regulation of generation of precursor metabolites and energy	3/39	160/18862	0.004376382	0.022963981	0.014098581	10891/5208/26330	3	BP
GO:2000191	regulation of fatty acid transport	2/39	48/18862	0.004425201	0.023093264	0.014177953	1579/2180	2	BP
GO:0046460	neutral lipid biosynthetic process	2/39	50/18862	0.004793248	0.024610494	0.015109447	2182/2180	2	BP
GO:0046463	acylglycerol biosynthetic process	2/39	50/18862	0.004793248	0.024610494	0.015109447	2182/2180	2	BP
GO:1902001	fatty acid transmembrane transport	2/39	50/18862	0.004793248	0.024610494	0.015109447	2180/1375	2	BP
GO:0016042	lipid catabolic process	4/39	340/18862	0.005189203	0.026501011	0.016270116	33/1579/10449/1375	4	BP
GO:0001659	temperature homeostasis	3/39	171/18862	0.005266131	0.026609286	0.016336591	33/2180/10891	3	BP
GO:0035725	sodium ion transmembrane transport	3/39	171/18862	0.005266131	0.026609286	0.016336591	496/479/495	3	BP
GO:0001666	response to hypoxia	4/39	348/18862	0.005630635	0.028301351	0.017375423	5313/10891/10449/218	4	BP
GO:0006754	ATP biosynthetic process	2/39	56/18862	0.005978964	0.029739118	0.01825813	5313/10891	2	BP
GO:0046456	icosanoid biosynthetic process	2/39	56/18862	0.005978964	0.029739118	0.01825813	1579/284541	2	BP
GO:0036293	response to decreased oxygen levels	4/39	360/18862	0.006339003	0.031366568	0.019257292	5313/10891/10449/218	4	BP
GO:0009749	response to glucose	3/39	185/18862	0.006546011	0.032058671	0.019682204	5313/10891/5208	3	BP
GO:0010565	regulation of cellular ketone metabolic process	3/39	185/18862	0.006546011	0.032058671	0.019682204	33/5468/10891	3	BP
GO:0032890	regulation of organic acid transport	2/39	60/18862	0.006836296	0.033309504	0.020450145	1579/2180	2	BP
GO:1905952	regulation of lipid localization	3/39	189/18862	0.006942803	0.033656733	0.020663324	5468/1579/2180	3	BP
GO:0009746	response to hexose	3/39	190/18862	0.007044193	0.033875426	0.020797589	5313/10891/5208	3	BP
GO:0070542	response to fatty acid	2/39	61/18862	0.007058858	0.033875426	0.020797589	2180/10891	2	BP
GO:1901605	alpha-amino acid metabolic process	3/39	191/18862	0.007146465	0.034124371	0.020950427	5832/64577/5471	3	BP
GO:0044272	sulfur compound biosynthetic process	3/39	193/18862	0.00735366	0.034939029	0.021450581	23205/2182/2180	3	BP
GO:0006790	sulfur compound metabolic process	4/39	378/18862	0.007509466	0.03534799	0.02170166	23205/2182/2180/5091	4	BP
GO:0048662	negative regulation of smooth muscle cell proliferation	2/39	63/18862	0.007513761	0.03534799	0.02170166	5468/10891	2	BP
GO:0034284	response to monosaccharide	3/39	196/18862	0.007671106	0.035911305	0.022047503	5313/10891/5208	3	BP
GO:0071300	cellular response to retinoic acid	2/39	64/18862	0.007746075	0.036085372	0.02215437	5468/8854	2	BP
GO:2000272	negative regulation of signaling receptor activity	2/39	66/18862	0.008220357	0.038108935	0.023396723	5468/10891	2	BP
GO:0009206	purine ribonucleoside triphosphate biosynthetic process	2/39	67/18862	0.008462298	0.039041037	0.02396898	5313/10891	2	BP
GO:0009145	purine nucleoside triphosphate biosynthetic process	2/39	68/18862	0.008707422	0.039978787	0.024544706	5313/10891	2	BP
GO:0006109	regulation of carbohydrate metabolic process	3/39	206/18862	0.00878751	0.040153457	0.024651943	10891/5208/26330	3	BP
GO:0032024	positive regulation of insulin secretion	2/39	71/18862	0.009461752	0.043001582	0.026400531	2182/5208	2	BP
GO:0071805	potassium ion transmembrane transport	3/39	212/18862	0.009500873	0.043001582	0.026400531	496/479/495	3	BP
GO:0042440	pigment metabolic process	2/39	72/18862	0.00971947	0.043783463	0.026880561	10891/5471	2	BP
GO:0009201	ribonucleoside triphosphate biosynthetic process	2/39	73/18862	0.009980304	0.044538271	0.02734397	5313/10891	2	BP
GO:0031100	animal organ regeneration	2/39	73/18862	0.009980304	0.044538271	0.02734397	5468/5471	2	BP
GO:0009064	glutamine family amino acid metabolic process	2/39	75/18862	0.010511263	0.046689565	0.028664742	5832/5471	2	BP
GO:0009743	response to carbohydrate	3/39	221/18862	0.01063297	0.047011511	0.028862399	5313/10891/5208	3	BP
GO:0032869	cellular response to insulin stimulus	3/39	226/18862	0.011294407	0.049705802	0.030516541	5313/5468/5471	3	BP
GO:0005759	mitochondrial matrix	6/38	476/19520	0.000289962	0.0144981	0.008851471	33/217/10449/160428/64064/5091	6	CC
GO:0005811	lipid droplet	3/38	95/19520	0.000832618	0.020815453	0.012708382	2182/2597/222	3	CC
GO:0016620	oxidoreductase activity								MF
GO:0016903	oxidoreductase activity								MF
GO:0004030	aldehyde dehydrogenase [NAD(P)+] activity	8/39	16/18337	2.47145E-18	1.28515E-16	6.59052E-17	8854/217/221/160428/127/10840/218/222	8	MF
GO:0004029	aldehyde dehydrogenase (NAD+) activity	7/39	15/18337	7.07701E-16	2.76003E-14	1.4154E-14	8854/217/221/160428/10840/218/222	7	MF
GO:0018455	alcohol dehydrogenase [NAD(P)+] activity	4/39	10/18337	3.63428E-09	1.13389E-07	5.81484E-08	125/124/127/126	4	MF
GO:0016616	oxidoreductase activity								MF
GO:0016614	oxidoreductase activity								MF
GO:0004745	retinol dehydrogenase activity	4/39	20/18337	8.25764E-08	1.61024E-06	8.25764E-07	125/124/127/126	4	MF
GO:0008553	proton-exporting ATPase activity								MF
GO:0004467	long-chain fatty acid-CoA ligase activity	3/39	14/18337	3.18566E-06	4.96962E-05	2.54853E-05	23205/2182/2180	3	MF
GO:0051287	NAD binding	4/39	53/18337	4.74545E-06	6.35257E-05	3.25773E-05	217/26330/127/2597	4	MF
GO:0015662	ion transmembrane transporter activity								MF
GO:0015645	fatty acid ligase activity	3/39	22/18337	1.33199E-05	0.000159839	8.19688E-05	23205/2182/2180	3	MF
GO:0016405	CoA-ligase activity	3/39	27/18337	2.51137E-05	0.000279838	0.000143507	23205/2182/2180	3	MF
GO:0016878	acid-thiol ligase activity	3/39	31/18337	3.8367E-05	0.000399017	0.000204624	23205/2182/2180	3	MF
GO:0016877	ligase activity								MF
GO:0019829	ATPase-coupled cation transmembrane transporter activity	3/39	44/18337	0.000110903	0.001017696	0.000521896	496/479/495	3	MF
GO:0042625	ATPase-coupled ion transmembrane transporter activity	3/39	46/18337	0.000126741	0.001098424	0.000563294	496/479/495	3	MF
GO:0020037	heme binding	4/39	140/18337	0.000217548	0.001786185	0.000915992	1579/113612/284541/1537	4	MF
GO:0047676	arachidonate-CoA ligase activity	2/39	11/18337	0.000239507	0.001868157	0.000958029	2182/2180	2	MF
GO:0046906	tetrapyrrole binding	4/39	150/18337	0.000283172	0.002103565	0.001078751	1579/113612/284541/1537	4	MF
GO:0016874	ligase activity	4/39	163/18337	0.000388365	0.002753862	0.001412237	23205/2182/2180/5091	4	MF
GO:0016918	retinal binding	2/39	18/18337	0.000660026	0.004476699	0.002295743	8854/127	2	MF
GO:0016646	oxidoreductase activity								MF
GO:0008391	arachidonic acid monooxygenase activity	2/39	20/18337	0.000817441	0.005100832	0.002615811	1579/284541	2	MF
GO:0008106	alcohol dehydrogenase (NADP+) activity	2/39	21/18337	0.000902275	0.005213143	0.002673407	127/218	2	MF
GO:0019200	carbohydrate kinase activity	2/39	21/18337	0.000902275	0.005213143	0.002673407	5208/5214	2	MF
GO:0004497	monooxygenase activity	3/39	101/18337	0.001283478	0.007150806	0.00366708	1579/113612/284541	3	MF
GO:0004033	aldo-keto reductase (NADP) activity	2/39	27/18337	0.001495989	0.008047388	0.004126865	127/218	2	MF
GO:0016645	oxidoreductase activity								MF
GO:0015078	proton transmembrane transporter activity	3/39	124/18337	0.002309349	0.011621242	0.005959611	496/479/495	3	MF
GO:0016712	oxidoreductase activity								MF
GO:0005501	retinoid binding	2/39	37/18337	0.002800728	0.013239807	0.006789645	8854/127	2	MF
GO:0019840	isoprenoid binding	2/39	38/18337	0.002952365	0.013546146	0.006946741	8854/127	2	MF
GO:0016887	ATPase activity	5/39	478/18337	0.003267278	0.014562726	0.007468064	23205/2182/2180/479/495	5	MF
GO:0030331	estrogen receptor binding	2/39	41/18337	0.003429912	0.014862952	0.007622026	5468/10891	2	MF
GO:0019842	vitamin binding	3/39	145/18337	0.003593609	0.015151431	0.007769965	8854/127/5091	3	MF
GO:0005506	iron ion binding	3/39	150/18337	0.00395212	0.016224494	0.008320253	1579/113612/284541	3	MF
GO:0015079	potassium ion transmembrane transporter activity	3/39	152/18337	0.004101414	0.016405658	0.008413158	496/479/495	3	MF
GO:0016709	oxidoreductase activity								MF
GO:0016705	oxidoreductase activity								MF
GO:0050661	NADP binding	2/39	53/18337	0.005672085	0.021067743	0.010803971	26330/2597	2	MF
GO:0042626	ATPase-coupled transmembrane transporter activity	2/39	58/18337	0.006758699	0.024519931	0.012574324	479/495	2	MF
GO:0016655	oxidoreductase activity								MF
GO:0015399	primary active transmembrane transporter activity	2/39	61/18337	0.007452471	0.025835234	0.013248838	479/495	2	MF
GO:0048029	monosaccharide binding	2/39	67/18337	0.008932191	0.030291778	0.015534245	2821/5214	2	MF
GO:0033293	monocarboxylic acid binding	2/39	71/18337	0.00998567	0.033143927	0.016996886	5468/5091	2	MF
GO:0035258	steroid hormone receptor binding	2/39	77/18337	0.011664062	0.037908203	0.019440104	5468/10891	2	MF
