# Supplementary material for: Comprehensive Analysis of Alteration Landscape and Its Clinical Significance of Mitochondrial Energy Metabolism Pathway-Related Genes in Lung Cancers
Source: Oxid Med Cell Longev. 2021 Dec 20;2021:9259297. doi: 10.1155/2021/9259297 (PMC8713050; doi:10.1155/2021/9259297)
Supplement: Supplementary 15 — Supplementary Table 6: clinical characteristics of lung cancer patients. [file 9259297.f15.txt]

SupplementaryTable 6. Clinical characteristics of Lung cancer patients.
id	gender	race	age	stage	site_of_resection	status	time	diagnosis	ACSBG1	CYP4A11	GAPDHS
TCGA-4B-A93V	female	black or african american	<=60	stage¢ñ	Lower lobe	1	300	Adenocarcinoma	High	Low	Low
TCGA-77-8133	male	not reported	>60	stage¢ñ	Lung	1	1640	Squamous cell carcinoma	Low	High	Low
TCGA-73-4666	female	white	<=60	stage¢ñ	Upper lobe	0	800	Adenocarcinoma	Low	Low	Low
TCGA-78-7149	male	white	>60	stage¢ñ	Lower lobe	0	3940	Adenocarcinoma	High	High	Low
TCGA-55-7910	female	black or african american	<=60	stage¢ñ	Lower lobe	0	1040	Adenocarcinoma	High	High	Low
TCGA-78-7156	male	white	>60	stage¢ñ	Lung	1	976	Adenocarcinoma	Low	High	Low
TCGA-78-8660	male	not reported	>60	stage¢ñ	Lower lobe	1	321	Adenocarcinoma	Low	High	Low
TCGA-85-7698	male	white	<=60	stage¢ñ	Upper lobe	0	952	Squamous cell carcinoma	Low	High	Low
TCGA-70-6722	male	asian	<=60	stage¢ñ	Upper lobe	0	367	Squamous cell carcinoma	Low	High	Low
TCGA-55-A493	female	white	<=60	stage¢ñ	Upper lobe	0	28	Adenocarcinoma	High	High	Low
TCGA-55-A492	female	white	>60	stage¢ñ	Upper lobe	0	596	Adenocarcinoma	Low	Low	Low
TCGA-44-5645	female	black or african american	>60	stage¢ñ	Upper lobe	0	852	Adenocarcinoma	High	High	Low
TCGA-97-7938	female	white	>60	stage¢ñ	Upper lobe	1	18	other	Low	High	Low
TCGA-67-3772	female	white	>60	stage¢ñ	Upper lobe	0	573	Adenocarcinoma	Low	High	Low
TCGA-68-7756	male	white	>60	stage¢ñ	Upper lobe	0	202	Squamous cell carcinoma	Low	Low	Low
TCGA-78-7162	male	white	>60	stage¢ñ	Upper lobe	1	3169	Adenocarcinoma	Low	High	Low
TCGA-75-5125	male	not reported	<=60	stage¢ñ	Upper lobe	1	2027	Adenocarcinoma	Low	High	Low
TCGA-55-7816	female	white	<=60	stage¢ñ	Upper lobe	1	468	Adenocarcinoma	Low	High	Low
TCGA-49-AAR4	male	black or african american	<=60	stage¢ñ	Upper lobe	1	879	Adenocarcinoma	High	Low	Low
TCGA-44-A4SS	male	white	>60	stage¢ñ	Upper lobe	0	415	Adenocarcinoma	High	High	Low
TCGA-50-5935	female	white	>60	stage¢ñ	Upper lobe	1	653	Adenocarcinoma	Low	High	Low
TCGA-55-7570	male	black or african american	<=60	stage¢ñ	Upper lobe	0	824	Adenocarcinoma	High	High	Low
TCGA-49-4512	female	white	>60	stage¢ñ	Middle lobe	1	905	Adenocarcinoma	High	High	High
TCGA-69-7761	male	white	>60	stage¢ñ	Lower lobe	0	186	other	Low	Low	Low
TCGA-55-6987	male	white	>60	stage¢ñ	Lower lobe	0	2137	Adenocarcinoma	High	High	Low
TCGA-55-7281	female	white	>60	stage¢ñ	Middle lobe	0	872	Adenocarcinoma	Low	Low	Low
TCGA-55-8204	female	white	>60	stage¢ñ	Upper lobe	0	515	Adenocarcinoma	High	Low	Low
TCGA-56-7221	male	white	>60	stage¢ñ	Lower lobe	0	608	Squamous cell carcinoma	High	Low	Low
TCGA-75-5147	female	not reported	<=60	stage¢ñ	Upper lobe	0	1333	other	High	High	Low
TCGA-78-7163	male	white	<=60	stage¢ñ	Lower lobe	0	7248	Adenocarcinoma	Low	High	Low
TCGA-44-5644	female	white	<=60	stage¢ñ	Lower lobe	0	863	Adenocarcinoma	Low	High	High
TCGA-62-8394	female	white	>60	stage¢ñ	Lower lobe	1	139	Adenocarcinoma	Low	High	High
TCGA-44-6778	male	black or african american	<=60	stage¢ñ	Lung	0	1864	Adenocarcinoma	Low	Low	Low
TCGA-60-2695	female	white	>60	stage¢ñ	Upper lobe	0	642	Squamous cell carcinoma	High	High	Low
TCGA-60-2713	male	white	>60	stage¢ñ	Lower lobe	0	1731	Squamous cell carcinoma	Low	High	High
TCGA-77-A5GF	male	not reported	>60	stage¢ñ	Lower lobe	1	840	Squamous cell carcinoma	Low	High	Low
TCGA-55-7907	male	white	>60	stage¢ñ	Upper lobe	1	343	Adenocarcinoma	Low	High	Low
TCGA-49-4514	female	white	>60	stage¢ñ	Upper lobe	0	1700	Adenocarcinoma	Low	Low	Low
TCGA-77-A5GA	male	not reported	>60	stage¢ñ	Upper lobe	0	1280	Squamous cell carcinoma	High	Low	High
TCGA-60-2697	male	white	<=60	stage¢ñ	Lung	1	372	Squamous cell carcinoma	High	High	Low
TCGA-73-4658	female	white	>60	stage¢ñ	Lower lobe	1	1600	Adenocarcinoma	Low	Low	Low
TCGA-49-4501	female	white	>60	stage¢ñ	Upper lobe	1	1421	Adenocarcinoma	Low	High	Low
TCGA-50-7109	male	white	<=60	stage¢ñ	Lower lobe	1	308	Adenocarcinoma	Low	High	High
TCGA-60-2703	male	white	>60	stage¢ñ	Lung	1	2945	Squamous cell carcinoma	Low	High	High
TCGA-51-4081	male	white	<=60	stage¢ñ	Upper lobe	0	911	Squamous cell carcinoma	High	High	Low
TCGA-75-7027	male	not reported	<=60	stage¢ñ	Lower lobe	0	3059	Adenocarcinoma	High	Low	High
TCGA-55-6984	female	white	>60	stage¢ñ	Lower lobe	1	760	Adenocarcinoma	Low	High	High
TCGA-49-AARR	male	black or african american	>60	stage¢ñ	Upper lobe	0	4992	Adenocarcinoma	High	High	Low
TCGA-60-2720	female	white	<=60	stage¢ñ	Lower lobe	0	97	Squamous cell carcinoma	Low	Low	Low
TCGA-56-A5DS	female	white	>60	stage¢ñ	Lower lobe	0	8	Squamous cell carcinoma	High	High	Low
TCGA-69-7760	male	white	>60	stage¢ñ	Lower lobe	0	202	Adenocarcinoma	Low	Low	Low
TCGA-55-8507	male	white	<=60	stage¢ñ	Upper lobe	0	418	Adenocarcinoma	Low	High	Low
TCGA-69-8254	male	white	>60	stage¢ñ	Lower lobe	0	409	Adenocarcinoma	High	Low	High
TCGA-55-1596	male	asian	<=60	stage¢ñ	Upper lobe	0	2065	Adenocarcinoma	Low	Low	High
TCGA-52-7810	female	white	<=60	stage¢ñ	Overlapping lesion of lung	0	923	Squamous cell carcinoma	Low	High	Low
TCGA-67-6215	female	white	<=60	stage¢ñ	Lower lobe	0	174	Adenocarcinoma	High	High	Low
TCGA-55-8510	female	white	<=60	stage¢ñ	Lower lobe	0	539	Adenocarcinoma	High	Low	High
TCGA-55-A491	female	white	>60	stage¢ñ	Lower lobe	0	626	Adenocarcinoma	Low	High	Low
TCGA-77-7335	female	white	>60	stage¢ñ	Lung	1	2133	Squamous cell carcinoma	Low	Low	Low
TCGA-55-8206	male	white	<=60	stage¢ñ	Upper lobe	0	888	Adenocarcinoma	High	Low	Low
TCGA-44-6776	female	white	<=60	stage¢ñ	Upper lobe	0	2616	Adenocarcinoma	Low	Low	Low
TCGA-75-6212	female	not reported	<=60	stage¢ñ	Lower lobe	1	1516	other	Low	Low	High
TCGA-58-8393	female	white	>60	stage¢ñ	Lower lobe	0	1058	Squamous cell carcinoma	High	High	Low
TCGA-77-8146	male	not reported	>60	stage¢ñ	Upper lobe	0	3189	Squamous cell carcinoma	Low	Low	Low
TCGA-55-6981	female	white	<=60	stage¢ñ	Upper lobe	1	1379	Adenocarcinoma	Low	High	High
TCGA-55-8616	female	white	<=60	stage¢ñ	Upper lobe	0	48	Adenocarcinoma	High	Low	Low
TCGA-55-6712	male	white	>60	stage¢ñ	Upper lobe	1	171	Adenocarcinoma	Low	Low	High
TCGA-49-AARQ	female	black or african american	<=60	stage¢ñ	Upper lobe	0	6732	Adenocarcinoma	Low	Low	Low
TCGA-77-7138	male	not reported	>60	stage¢ñ	Lower lobe	1	340	Squamous cell carcinoma	Low	High	Low
TCGA-50-6594	female	black or african american	>60	stage¢ñ	Upper lobe	1	370	Adenocarcinoma	Low	High	Low
TCGA-85-6560	male	white	<=60	stage¢ñ	Upper lobe	0	1259	Squamous cell carcinoma	Low	High	Low
TCGA-56-A4BY	male	white	>60	stage¢ñ	Upper lobe	1	543	Squamous cell carcinoma	High	Low	Low
TCGA-53-7624	female	white	<=60	stage¢ñ	Upper lobe	1	1043	Adenocarcinoma	High	High	High
TCGA-44-A47A	female	white	>60	stage¢ñ	Upper lobe	0	466	Adenocarcinoma	High	Low	Low
TCGA-50-5931	female	white	>60	stage¢ñ	Upper lobe	1	434	Adenocarcinoma	Low	High	Low
TCGA-50-5939	male	white	>60	stage¢ñ	Upper lobe	1	460	Adenocarcinoma	Low	Low	Low
TCGA-55-8508	female	black or african american	<=60	stage¢ñ	Upper lobe	0	617	Adenocarcinoma	Low	High	Low
TCGA-44-6779	female	white	<=60	stage¢ñ	Lung	1	500	Adenocarcinoma	Low	High	Low
TCGA-85-7696	male	white	>60	stage¢ñ	Upper lobe	0	1111	Squamous cell carcinoma	High	High	Low
TCGA-58-A46J	male	white	>60	stage¢ñ	Lower lobe	0	2589	Squamous cell carcinoma	High	Low	Low
TCGA-52-7812	male	white	>60	stage¢ñ	Lung	1	835	Squamous cell carcinoma	Low	Low	High
TCGA-55-6970	female	white	>60	stage¢ñ	Upper lobe	1	464	Adenocarcinoma	Low	Low	High
TCGA-69-8253	female	black or african american	<=60	stage¢ñ	Lower lobe	0	426	Adenocarcinoma	Low	Low	High
TCGA-55-8621	female	white	>60	stage¢ñ	Lower lobe	0	515	Adenocarcinoma	High	High	Low
TCGA-50-5044	female	white	>60	stage¢ñ	Lower lobe	1	624	Adenocarcinoma	Low	Low	Low
TCGA-71-8520	female	asian	<=60	stage¢ñ	Upper lobe	1	210	Adenocarcinoma	Low	Low	Low
TCGA-44-7667	female	white	<=60	stage¢ñ	Lower lobe	0	1097	Adenocarcinoma	Low	High	Low
TCGA-56-8082	female	white	>60	stage¢ñ	Lower lobe	0	455	Squamous cell carcinoma	Low	Low	Low
TCGA-55-8094	male	white	<=60	stage¢ñ	Upper lobe	0	541	Adenocarcinoma	Low	Low	Low
TCGA-50-5944	female	white	>60	stage¢ñ	Upper lobe	0	1750	other	Low	High	Low
TCGA-80-5611	male	not reported	<=60	stage¢ñ	Upper lobe	0	2595	other	Low	High	Low
TCGA-44-A479	female	black or african american	>60	stage¢ñ	Upper lobe	0	486	Adenocarcinoma	High	Low	Low
TCGA-55-6986	female	white	>60	stage¢ñ	Lower lobe	0	3261	other	Low	Low	Low
TCGA-78-7158	female	white	<=60	stage¢ñ	Lower lobe	1	179	Adenocarcinoma	High	Low	Low
TCGA-58-8391	female	white	<=60	stage¢ñ	Main bronchus	0	2167	Squamous cell carcinoma	High	High	Low
TCGA-49-4505	female	white	>60	stage¢ñ	Lower lobe	1	428	Adenocarcinoma	High	High	Low
TCGA-55-8092	male	white	>60	stage¢ñ	Upper lobe	1	154	Adenocarcinoma	High	Low	High
TCGA-55-8619	female	white	>60	stage¢ñ	Lower lobe	0	416	Adenocarcinoma	High	High	High
TCGA-78-7159	female	white	<=60	stage¢ñ	Upper lobe	0	1974	Adenocarcinoma	Low	Low	High
TCGA-77-6843	male	white	>60	stage¢ñ	Upper lobe	1	2224	Squamous cell carcinoma	Low	Low	Low
TCGA-56-8307	female	white	<=60	stage¢ñ	Lower lobe	0	818	Squamous cell carcinoma	High	High	Low
TCGA-55-8506	female	white	>60	stage¢ñ	Upper lobe	0	11	Adenocarcinoma	Low	High	Low
TCGA-46-3769	male	white	<=60	stage¢ñ	Upper lobe	0	135	Squamous cell carcinoma	Low	High	Low
TCGA-49-6744	female	white	>60	stage¢ñ	Upper lobe	0	1683	Adenocarcinoma	Low	High	Low
TCGA-44-6148	male	white	<=60	stage¢ñ	Lower lobe	0	704	Adenocarcinoma	High	Low	Low
TCGA-77-8143	male	not reported	>60	stage¢ñ	Upper lobe	1	803	Squamous cell carcinoma	High	Low	Low
TCGA-53-A4EZ	male	white	>60	stage¢ñ	Upper lobe	0	1071	other	High	High	High
TCGA-60-2712	female	white	>60	stage¢ñ	Upper lobe	1	274	Squamous cell carcinoma	High	Low	Low
TCGA-49-AAR3	male	black or african american	>60	stage¢ñ	Upper lobe	0	1893	Adenocarcinoma	Low	Low	High
TCGA-69-7979	female	white	>60	stage¢ñ	Upper lobe	0	408	other	High	Low	High
TCGA-78-7153	female	white	>60	stage¢ñ	Overlapping lesion of lung	0	3635	Adenocarcinoma	Low	Low	Low
TCGA-51-4079	female	black or african american	>60	stage¢ñ	Upper lobe	1	12	Squamous cell carcinoma	Low	Low	Low
TCGA-77-6842	male	white	>60	stage¢ñ	Overlapping lesion of lung	1	899	Squamous cell carcinoma	Low	High	Low
TCGA-49-6743	female	white	>60	stage¢ñ	Upper lobe	0	1621	Adenocarcinoma	Low	High	High
TCGA-50-6597	female	white	>60	stage¢ñ	Lower lobe	1	1268	Adenocarcinoma	Low	Low	Low
TCGA-56-8308	male	white	>60	stage¢ñ	Upper lobe	0	517	Squamous cell carcinoma	High	Low	High
TCGA-77-A5GH	male	not reported	>60	stage¢ñ	Upper lobe	0	1182	Squamous cell carcinoma	Low	High	High
TCGA-44-A47B	male	white	>60	stage¢ñ	Upper lobe	0	287	Adenocarcinoma	High	Low	Low
TCGA-50-5072	male	white	>60	stage¢ñ	Upper lobe	1	250	Adenocarcinoma	Low	High	Low
TCGA-44-A4SU	female	white	>60	stage¢ñ	Lower lobe	1	409	Adenocarcinoma	High	High	High
TCGA-55-8208	female	white	>60	stage¢ñ	Upper lobe	0	674	Adenocarcinoma	High	High	High
TCGA-73-A9RS	male	black or african american	<=60	stage¢ñ	Upper lobe	1	340	Adenocarcinoma	Low	High	Low
TCGA-55-7911	female	white	>60	stage¢ñ	Middle lobe	0	537	Adenocarcinoma	High	High	Low
TCGA-56-8622	male	white	>60	stage¢ñ	Lower lobe	0	55	Squamous cell carcinoma	Low	Low	Low
TCGA-55-8301	male	white	<=60	stage¢ñ	Lower lobe	0	534	Adenocarcinoma	Low	Low	Low
TCGA-78-7146	female	white	>60	stage¢ñ	Lower lobe	1	173	Adenocarcinoma	Low	Low	Low
TCGA-50-5066	male	black or african american	>60	stage¢ñ	Upper lobe	0	1442	Adenocarcinoma	Low	High	Low
TCGA-44-6146	male	white	>60	stage¢ñ	Lower lobe	0	728	Adenocarcinoma	Low	High	High
TCGA-77-8150	male	not reported	>60	stage¢ñ	Lung	1	1655	Squamous cell carcinoma	Low	Low	Low
TCGA-49-6745	male	white	>60	stage¢ñ	Upper lobe	0	522	Adenocarcinoma	Low	High	High
TCGA-70-6723	male	asian	>60	stage¢ñ	Upper lobe	0	375	Squamous cell carcinoma	High	High	Low
TCGA-78-7161	female	white	>60	stage¢ñ	Upper lobe	1	291	Adenocarcinoma	High	High	High
TCGA-60-2719	female	white	>60	stage¢ñ	Lung	0	1297	Squamous cell carcinoma	High	High	Low
TCGA-55-8302	male	white	<=60	stage¢ñ	Lower lobe	0	478	Adenocarcinoma	Low	Low	Low
TCGA-58-A46N	male	white	<=60	stage¢ñ	Lower lobe	0	910	Squamous cell carcinoma	Low	Low	Low
TCGA-55-1592	male	white	>60	stage¢ñ	Upper lobe	1	701	Adenocarcinoma	High	Low	High
TCGA-68-A59I	female	black or african american	>60	stage¢ñ	Lower lobe	0	492	Squamous cell carcinoma	High	Low	High
TCGA-55-A48Y	male	white	>60	stage¢ñ	Lower lobe	0	630	Adenocarcinoma	Low	High	Low
TCGA-78-7152	male	white	>60	stage¢ñ	Upper lobe	1	1215	Adenocarcinoma	Low	High	High
TCGA-85-7697	male	white	<=60	stage¢ñ	Upper lobe	0	1063	Squamous cell carcinoma	High	Low	Low
TCGA-49-6761	female	white	>60	stage¢ñ	Upper lobe	0	354	Adenocarcinoma	Low	Low	High
TCGA-46-3766	female	white	>60	stage¢ñ	Lower lobe	0	370	Squamous cell carcinoma	Low	Low	Low
TCGA-58-8392	male	white	>60	stage¢ñ	Upper lobe	1	501	Squamous cell carcinoma	High	High	Low
TCGA-56-7222	male	white	<=60	stage¢ñ	Upper lobe	1	562	Squamous cell carcinoma	Low	Low	High
TCGA-44-8119	male	white	>60	stage¢ñ	Upper lobe	0	285	Adenocarcinoma	High	Low	Low
TCGA-53-7813	female	white	<=60	stage¢ñ	Upper lobe	0	424	other	Low	High	Low
TCGA-58-8390	male	white	>60	stage¢ñ	Lower lobe	0	911	Squamous cell carcinoma	Low	High	Low
TCGA-51-4080	male	black or african american	>60	stage¢ñ	Upper lobe	1	12	Squamous cell carcinoma	Low	Low	High
TCGA-49-4506	female	white	>60	stage¢ñ	Upper lobe	1	999	Adenocarcinoma	High	High	High
TCGA-56-6545	female	white	>60	stage¢ñ	Upper lobe	0	666	Squamous cell carcinoma	Low	High	High
TCGA-44-6777	female	white	>60	stage¢ñ	Upper lobe	1	987	Adenocarcinoma	Low	Low	Low
TCGA-68-7755	female	white	<=60	stage¢ñ	Lower lobe	0	83	Squamous cell carcinoma	High	High	High
TCGA-55-8090	male	white	>60	stage¢ñ	Lower lobe	1	598	Adenocarcinoma	High	High	Low
TCGA-73-4675	male	white	<=60	stage¢ñ	Lower lobe	1	922	Adenocarcinoma	High	High	Low
TCGA-55-7574	female	white	>60	stage¢ñ	Upper lobe	1	995	Adenocarcinoma	Low	Low	Low
TCGA-50-6593	female	white	<=60	stage¢ñ	Upper lobe	1	336	Adenocarcinoma	High	Low	High
TCGA-50-5049	male	white	>60	stage¢ñ	Upper lobe	0	3094	Adenocarcinoma	Low	High	Low
TCGA-50-8457	female	black or african american	>60	stage¢ñ	Upper lobe	0	1125	Adenocarcinoma	Low	High	Low
TCGA-69-7974	female	white	<=60	stage¢ñ	Upper lobe	0	184	Adenocarcinoma	High	Low	Low
TCGA-77-A5G3	male	not reported	>60	stage¢ñ	Main bronchus	0	4570	Squamous cell carcinoma	High	Low	Low
TCGA-77-8148	male	not reported	>60	stage¢ñ	Lung	0	2023	Squamous cell carcinoma	High	High	Low
TCGA-44-8120	male	black or african american	<=60	stage¢ñ	Upper lobe	0	260	Adenocarcinoma	Low	Low	High
TCGA-77-8140	female	not reported	>60	stage¢ñ	Lower lobe	1	351	Squamous cell carcinoma	High	Low	High
TCGA-55-7815	male	not reported	>60	stage¢ñ	Lower lobe	0	773	Adenocarcinoma	Low	High	Low
TCGA-69-8255	male	white	>60	stage¢ñ	Upper lobe	0	129	other	High	High	Low
TCGA-56-7822	male	black or african american	>60	stage¢ñ	Upper lobe	1	532	Squamous cell carcinoma	High	Low	High
TCGA-60-2721	male	white	>60	stage¢ñ	Upper lobe	0	983	Squamous cell carcinoma	High	Low	Low
TCGA-44-6147	female	white	>60	stage¢ñ	Upper lobe	0	845	Adenocarcinoma	High	High	High
TCGA-55-6972	male	white	>60	stage¢ñ	Upper lobe	1	1632	Adenocarcinoma	Low	High	High
TCGA-78-7167	male	white	>60	stage¢ñ	Lung	1	2681	Adenocarcinoma	High	High	High
TCGA-56-8625	female	white	>60	stage¢ñ	Lower lobe	1	315	Squamous cell carcinoma	Low	Low	Low
TCGA-49-6742	male	white	>60	stage¢ñ	Upper lobe	1	488	Adenocarcinoma	Low	High	Low
TCGA-69-A59K	female	black or african american	<=60	stage¢ñ	Upper lobe	0	591	Adenocarcinoma	High	Low	Low
TCGA-78-7542	male	white	<=60	stage¢ñ	Upper lobe	1	321	Adenocarcinoma	Low	Low	High
TCGA-77-6844	male	white	>60	stage¢ñ	Lower lobe	1	2284	Squamous cell carcinoma	Low	High	Low
TCGA-55-8091	male	white	>60	stage¢ñ	Lower lobe	0	600	Adenocarcinoma	High	Low	Low
TCGA-49-4490	female	white	<=60	stage¢ñ	Upper lobe	1	385	Adenocarcinoma	High	Low	Low
TCGA-55-7725	female	white	>60	stage¢ñ	Lower lobe	0	442	Adenocarcinoma	Low	Low	Low
TCGA-55-8203	female	white	>60	stage¢ñ	Lower lobe	0	547	Adenocarcinoma	Low	Low	Low
TCGA-77-8009	male	not reported	>60	stage¢ñ	Lung	1	1695	Squamous cell carcinoma	Low	High	Low
TCGA-56-8504	male	white	>60	stage¢ñ	Upper lobe	0	510	Squamous cell carcinoma	Low	High	Low
TCGA-50-5051	female	white	<=60	stage¢ñ	Upper lobe	1	478	Adenocarcinoma	Low	High	Low
TCGA-78-7148	male	white	>60	stage¢ñ	Upper lobe	1	626	Adenocarcinoma	Low	Low	High
TCGA-67-6217	female	white	>60	stage¢ñ	Upper lobe	0	422	Adenocarcinoma	High	Low	Low
TCGA-55-6979	female	white	<=60	stage¢ñ	Upper lobe	1	237	Adenocarcinoma	Low	Low	Low
TCGA-85-6798	male	white	<=60	stage¢ñ	Upper lobe	1	195	Squamous cell carcinoma	Low	High	Low
TCGA-55-7227	male	white	>60	stage¢ñ	Lower lobe	1	952	Adenocarcinoma	High	High	Low
TCGA-46-6026	male	white	>60	stage¢ñ	Lower lobe	0	423	Squamous cell carcinoma	High	Low	Low
TCGA-55-7728	female	white	>60	stage¢ñ	Upper lobe	0	704	Adenocarcinoma	High	High	High
TCGA-55-6971	female	white	<=60	stage¢ñ	Lower lobe	0	1400	Adenocarcinoma	Low	Low	High
TCGA-60-2716	male	not reported	<=60	stage¢ñ	Lung	0	1475	Squamous cell carcinoma	High	High	High
TCGA-56-8201	male	white	>60	stage¢ñ	Upper lobe	1	397	Squamous cell carcinoma	Low	Low	High
TCGA-56-A62T	male	black or african american	>60	stage¢ñ	Upper lobe	0	440	Squamous cell carcinoma	Low	Low	Low
TCGA-55-8615	male	white	>60	stage¢ñ	Middle lobe	0	446	Adenocarcinoma	Low	Low	Low
TCGA-75-6214	female	not reported	<=60	stage¢ñ	Upper lobe	1	1115	Adenocarcinoma	Low	High	High
TCGA-50-6595	female	white	>60	stage¢ñ	Upper lobe	1	189	Adenocarcinoma	Low	High	Low
TCGA-73-7498	female	white	<=60	stage¢ñ	Lower lobe	0	1189	other	High	High	High
TCGA-78-7150	male	white	<=60	stage¢ñ	Lower lobe	1	666	Adenocarcinoma	Low	High	Low
TCGA-73-4668	female	american indian or alaska native	>60	stage¢ñ	Upper lobe	0	467	other	High	Low	Low
TCGA-49-4510	female	black or african american	<=60	stage¢ñ	Upper lobe	1	896	Adenocarcinoma	High	Low	Low
TCGA-73-4659	male	white	>60	stage¢ñ	Lung	1	711	Adenocarcinoma	High	High	Low
TCGA-44-7662	male	white	>60	stage¢ñ	Upper lobe	0	218	Adenocarcinoma	Low	High	Low
TCGA-56-7731	female	white	>60	stage¢ñ	Upper lobe	1	3	Squamous cell carcinoma	Low	Low	High
TCGA-50-5941	female	white	<=60	stage¢ñ	Upper lobe	0	1474	Adenocarcinoma	Low	High	High
TCGA-55-6978	male	white	>60	stage¢ñ	Middle lobe	1	176	Adenocarcinoma	High	Low	Low
TCGA-49-AAQV	female	black or african american	>60	stage¢ñ	Lower lobe	1	677	Adenocarcinoma	High	Low	Low
TCGA-77-8139	male	not reported	>60	stage¢ñ	Upper lobe	0	3166	Squamous cell carcinoma	High	High	Low
TCGA-75-5146	male	not reported	<=60	stage¢ñ	Lower lobe	0	2368	other	Low	Low	High
TCGA-77-8136	female	not reported	>60	stage¢ñ	Lower lobe	1	1189	Squamous cell carcinoma	High	High	High
TCGA-49-AAR2	male	black or african american	>60	stage¢ñ	Lower lobe	0	2224	other	Low	Low	Low
TCGA-44-8117	female	white	<=60	stage¢ñ	Upper lobe	0	385	Adenocarcinoma	Low	Low	Low
TCGA-56-7730	male	white	>60	stage¢ñ	Upper lobe	1	198	Squamous cell carcinoma	High	Low	High
TCGA-55-7576	male	black or african american	<=60	stage¢ñ	Upper lobe	0	670	Adenocarcinoma	Low	Low	Low
TCGA-55-7726	female	white	>60	stage¢ñ	Lower lobe	0	652	Adenocarcinoma	Low	Low	High
TCGA-60-2709	male	black or african american	>60	stage¢ñ	Upper lobe	0	1505	Squamous cell carcinoma	Low	Low	High
TCGA-68-A59J	female	white	>60	stage¢ñ	Lower lobe	0	448	Squamous cell carcinoma	High	High	Low
TCGA-60-2711	female	white	>60	stage¢ñ	Lung	0	1260	Squamous cell carcinoma	Low	High	Low
TCGA-67-6216	female	white	<=60	stage¢ñ	Middle lobe	0	141	Adenocarcinoma	Low	High	Low
TCGA-69-7763	male	white	>60	stage¢ñ	Middle lobe	0	690	Adenocarcinoma	Low	Low	High
TCGA-56-5898	male	white	>60	stage¢ñ	Upper lobe	0	555	Squamous cell carcinoma	Low	Low	Low
TCGA-55-8097	female	white	<=60	stage¢ñ	Upper lobe	0	476	Adenocarcinoma	High	Low	High
TCGA-78-7154	male	white	>60	stage¢ñ	Upper lobe	1	593	Adenocarcinoma	Low	Low	Low
TCGA-78-7537	male	not reported	>60	stage¢ñ	Upper lobe	1	1622	Adenocarcinoma	Low	Low	Low
TCGA-60-2723	female	white	>60	stage¢ñ	Lung	0	1092	Squamous cell carcinoma	Low	Low	High
TCGA-60-2724	male	white	<=60	stage¢ñ	Main bronchus	0	717	Squamous cell carcinoma	High	High	Low
TCGA-46-6025	male	white	>60	stage¢ñ	Lower lobe	0	324	Squamous cell carcinoma	Low	High	High
TCGA-49-4494	male	white	>60	stage¢ñ	Upper lobe	1	1081	Adenocarcinoma	Low	High	Low
TCGA-55-A57B	female	black or african american	>60	stage¢ñ	Upper lobe	0	546	Adenocarcinoma	High	Low	Low
TCGA-60-2698	male	white	>60	stage¢ñ	Lower lobe	1	311	Squamous cell carcinoma	High	Low	Low
TCGA-60-2726	male	white	<=60	stage¢ñ	Middle lobe	1	358	Squamous cell carcinoma	High	Low	Low
TCGA-49-4488	female	white	>60	stage¢ñ	Lower lobe	1	869	Adenocarcinoma	Low	Low	Low
TCGA-77-A5G1	male	not reported	>60	stage¢ñ	Lower lobe	0	4026	Squamous cell carcinoma	High	Low	Low
TCGA-77-7338	male	white	>60	stage¢ñ	Upper lobe	1	5	Squamous cell carcinoma	Low	Low	High
TCGA-69-7973	female	white	<=60	stage¢ñ	Middle lobe	0	230	Adenocarcinoma	Low	High	High
TCGA-44-7672	female	white	<=60	stage¢ñ	Upper lobe	0	719	Adenocarcinoma	High	High	Low
TCGA-49-AARO	female	black or african american	<=60	stage¢ñ	Upper lobe	0	3759	Adenocarcinoma	High	High	Low
TCGA-50-6591	female	white	>60	stage¢ñ	Lower lobe	1	119	Adenocarcinoma	Low	Low	Low
TCGA-58-A46K	male	white	<=60	stage¢ñ	Lower lobe	1	1045	Squamous cell carcinoma	High	Low	Low
TCGA-55-A494	female	white	>60	stage¢ñ	Lower lobe	0	481	Adenocarcinoma	High	Low	High
TCGA-69-8453	male	white	>60	stage¢ñ	Lower lobe	0	813	Adenocarcinoma	High	Low	Low
TCGA-50-5933	male	white	>60	stage¢ñ	Lower lobe	1	2393	Adenocarcinoma	Low	Low	High
TCGA-55-6642	male	white	>60	stage¢ñ	Lower lobe	0	2449	Adenocarcinoma	Low	High	High
TCGA-55-8620	male	white	<=60	stage¢ñ	Upper lobe	1	375	Adenocarcinoma	Low	Low	Low
TCGA-60-2704	male	white	>60	stage¢ñ	Upper lobe	1	1154	Squamous cell carcinoma	Low	High	Low
TCGA-85-6561	male	white	>60	stage¢ñ	Upper lobe	0	1224	Squamous cell carcinoma	Low	Low	Low
TCGA-78-7540	female	white	>60	stage¢ñ	Lower lobe	1	1197	other	High	High	Low
TCGA-46-3768	male	white	<=60	stage¢ñ	Upper lobe	1	299	Squamous cell carcinoma	Low	Low	High
TCGA-55-6543	female	white	<=60	stage¢ñ	Upper lobe	0	435	other	High	High	Low
TCGA-78-8648	female	not reported	<=60	stage¢ñ	Upper lobe	1	1209	Adenocarcinoma	Low	High	Low
TCGA-77-7463	male	white	>60	stage¢ñ	Upper lobe	1	1423	Squamous cell carcinoma	High	High	High
TCGA-66-2800	male	not reported	>60	stage¢ñ	Upper lobe	0	1492	Squamous cell carcinoma	Low	High	High
TCGA-55-A4DG	male	white	>60	stage¢ñ	Upper lobe	0	608	Adenocarcinoma	High	High	High
TCGA-71-6725	female	asian	<=60	stage¢ñ	Upper lobe	0	256	Adenocarcinoma	High	Low	Low
TCGA-55-8513	female	white	>60	stage¢ñ	Lower lobe	0	791	Adenocarcinoma	High	High	Low
TCGA-55-8205	female	white	>60	stage¢ñ	Lower lobe	0	599	Adenocarcinoma	High	Low	Low
TCGA-78-7539	female	white	>60	stage¢ñ	Upper lobe	0	791	Adenocarcinoma	High	Low	High
TCGA-44-6145	female	white	>60	stage¢ñ	Upper lobe	0	595	Adenocarcinoma	Low	Low	Low
TCGA-78-7535	male	white	<=60	stage¢ñ	Upper lobe	1	949	Adenocarcinoma	Low	High	Low
TCGA-80-5608	female	not reported	<=60	stage¢ñ	Upper lobe	0	2832	Adenocarcinoma	Low	Low	Low
TCGA-56-A4ZK	female	white	>60	stage¢ñ	Lower lobe	0	570	Squamous cell carcinoma	High	Low	Low
TCGA-73-4662	female	white	>60	stage¢ñ	Upper lobe	0	2515	Adenocarcinoma	Low	High	Low
TCGA-55-8089	male	white	<=60	stage¢ñ	Upper lobe	1	702	Adenocarcinoma	Low	High	Low
TCGA-55-8512	male	white	<=60	stage¢ñ	Lower lobe	1	607	other	High	High	Low
TCGA-85-6175	female	white	>60	stage¢ñ	Upper lobe	1	294	Squamous cell carcinoma	High	High	Low
TCGA-56-8629	male	white	>60	stage¢ñ	Lower lobe	0	481	Squamous cell carcinoma	Low	High	Low
TCGA-58-8386	male	not reported	>60	stage¢ñ	Upper lobe	1	1	Squamous cell carcinoma	High	Low	Low
TCGA-50-6592	female	white	>60	stage¢ñ	Lower lobe	1	777	Adenocarcinoma	Low	High	Low
TCGA-50-5936	male	white	<=60	stage¢ñ	Lower lobe	1	257	Adenocarcinoma	Low	High	Low
TCGA-73-7499	female	white	>60	stage¢ñ	Upper lobe	1	1531	Adenocarcinoma	High	High	High
TCGA-77-8007	male	not reported	>60	stage¢ñ	Upper lobe	1	198	Squamous cell carcinoma	Low	Low	Low
TCGA-44-7670	female	white	<=60	stage¢ñ	Upper lobe	0	882	Adenocarcinoma	High	Low	Low
TCGA-60-2714	female	white	>60	stage¢ñ	Lung	0	1531	Squamous cell carcinoma	High	High	Low
TCGA-73-4670	female	white	>60	stage¢ñ	Upper lobe	0	131	Adenocarcinoma	High	High	Low
TCGA-69-7765	male	black or african american	<=60	stage¢ñ	Upper lobe	0	165	Adenocarcinoma	Low	Low	Low
TCGA-60-2696	female	black or african american	>60	stage¢ñ	Upper lobe	1	109	Squamous cell carcinoma	Low	High	Low
TCGA-55-7724	female	white	>60	stage¢ñ	Upper lobe	0	705	Adenocarcinoma	Low	High	Low
TCGA-78-7536	male	white	>60	stage¢ñ	Upper lobe	1	244	Adenocarcinoma	Low	Low	Low
TCGA-50-5946	male	white	>60	stage¢ñ	Upper lobe	0	1617	Adenocarcinoma	High	High	High
TCGA-56-A4BW	male	white	<=60	stage¢ñ	Upper lobe	0	585	Squamous cell carcinoma	High	High	Low
TCGA-49-4486	male	white	>60	stage¢ñ	Lower lobe	1	2318	Adenocarcinoma	Low	Low	High
TCGA-56-8623	male	white	>60	stage¢ñ	Upper lobe	1	692	Squamous cell carcinoma	High	Low	High
TCGA-78-7147	female	white	>60	stage¢ñ	Upper lobe	1	586	Adenocarcinoma	High	Low	Low
TCGA-50-5068	female	white	<=60	stage¢ñ	Lower lobe	1	1499	Adenocarcinoma	Low	High	High
TCGA-50-5930	male	white	<=60	stage¢ñ	Lower lobe	1	282	Adenocarcinoma	Low	Low	High
TCGA-77-8008	male	not reported	>60	stage¢ñ	Lower lobe	1	2639	Squamous cell carcinoma	High	Low	High
TCGA-55-7573	female	white	>60	stage¢ñ	Upper lobe	0	487	Adenocarcinoma	High	High	High
TCGA-60-2722	male	white	>60	stage¢ñ	Upper lobe	0	908	Squamous cell carcinoma	High	High	Low
TCGA-50-5942	female	white	>60	stage¢ñ	Upper lobe	0	1847	Adenocarcinoma	High	Low	Low
TCGA-44-7669	male	black or african american	<=60	stage¢ñ	Upper lobe	1	574	Adenocarcinoma	High	Low	Low
TCGA-55-8514	female	black or african american	>60	stage¢ñ	Upper lobe	0	520	Adenocarcinoma	High	High	High
TCGA-56-8626	male	white	<=60	stage¢ñ	Upper lobe	1	302	Squamous cell carcinoma	High	High	Low
TCGA-67-3773	female	white	>60	stage¢ñ	Lower lobe	0	427	Adenocarcinoma	Low	High	Low
TCGA-49-AAR0	male	black or african american	<=60	stage¢ñ	Upper lobe	0	4765	Adenocarcinoma	High	Low	Low
TCGA-46-3765	female	white	<=60	stage¢ñ	Upper lobe	0	405	Squamous cell carcinoma	Low	High	Low
TCGA-56-8309	male	white	>60	stage¢ñ	Lower lobe	0	428	Squamous cell carcinoma	Low	Low	High
TCGA-56-1622	male	white	<=60	stage¢ñ	Lower lobe	1	881	Squamous cell carcinoma	High	High	Low
TCGA-77-7142	female	white	<=60	stage¢ñ	Upper lobe	0	2227	Squamous cell carcinoma	Low	High	High
TCGA-55-8614	male	white	>60	stage¢ñ	Upper lobe	0	536	Adenocarcinoma	High	Low	High
TCGA-77-A5G6	male	not reported	>60	stage¢ñ	Upper lobe	1	678	Squamous cell carcinoma	Low	Low	High
TCGA-50-6673	female	white	>60	stage¢ñ	Upper lobe	1	22	Adenocarcinoma	High	Low	High
TCGA-55-1594	male	white	>60	stage¢ñ	Lower lobe	0	1178	Adenocarcinoma	High	Low	High
TCGA-44-7661	female	white	>60	stage¢ñ	Lower lobe	1	557	Adenocarcinoma	Low	High	Low
TCGA-58-A46L	male	white	>60	stage¢ñ	Upper lobe	0	1723	Squamous cell carcinoma	High	Low	High
TCGA-77-8154	male	not reported	>60	stage¢ñ	Lower lobe	0	1841	Squamous cell carcinoma	High	Low	High
TCGA-68-8250	male	black or african american	>60	stage¢ñ	Upper lobe	0	244	Squamous cell carcinoma	High	High	Low
TCGA-51-6867	female	white	>60	stage¢ñ	Upper lobe	1	1856	Squamous cell carcinoma	Low	Low	Low
TCGA-60-2710	female	white	>60	stage¢ñ	Upper lobe	0	2024	Squamous cell carcinoma	High	High	Low
TCGA-44-6774	female	white	<=60	stage¢ñ	Lower lobe	0	658	Adenocarcinoma	Low	Low	High
TCGA-77-7141	male	white	>60	stage¢ñ	Upper lobe	0	15	Squamous cell carcinoma	High	Low	Low
TCGA-58-8388	male	white	<=60	stage¢ñ	Upper lobe	1	412	Squamous cell carcinoma	Low	Low	High
TCGA-77-6845	male	white	>60	stage¢ñ	Middle lobe	1	708	Squamous cell carcinoma	High	Low	Low
TCGA-55-6968	male	white	>60	stage¢ñ	Lower lobe	1	1293	Adenocarcinoma	Low	Low	Low
TCGA-50-8460	male	white	>60	stage¢ñ	Upper lobe	0	829	Adenocarcinoma	High	High	High
TCGA-56-8503	female	white	>60	stage¢ñ	Lower lobe	0	41	Squamous cell carcinoma	Low	Low	Low
TCGA-49-6767	female	white	<=60	stage¢ñ	Middle lobe	0	677	Adenocarcinoma	Low	Low	Low
TCGA-52-7811	male	white	>60	stage¢ñ	Lower lobe	1	266	Squamous cell carcinoma	Low	High	Low
TCGA-55-7727	male	white	>60	stage¢ñ	Upper lobe	0	119	Adenocarcinoma	Low	Low	High
TCGA-73-4676	male	white	<=60	stage¢ñ	Upper lobe	1	281	Adenocarcinoma	Low	Low	Low
TCGA-44-A47G	female	white	>60	stage¢ñ	Upper lobe	0	351	Adenocarcinoma	High	High	Low
TCGA-77-7140	female	white	>60	stage¢ñ	Upper lobe	1	632	Squamous cell carcinoma	Low	High	Low
TCGA-55-A4DF	male	white	>60	stage¢ñ	Lower lobe	1	440	Adenocarcinoma	High	Low	Low
TCGA-44-7671	male	black or african american	>60	stage¢ñ	Middle lobe	0	889	Adenocarcinoma	High	High	Low
TCGA-78-7155	male	white	>60	stage¢ñ	Upper lobe	1	1171	Adenocarcinoma	Low	Low	High
TCGA-53-7626	female	white	>60	stage¢ñ	Upper lobe	1	929	Adenocarcinoma	Low	High	Low
TCGA-78-8640	male	not reported	<=60	stage¢ñ	Upper lobe	0	7062	Adenocarcinoma	Low	High	Low
TCGA-55-5899	male	white	<=60	stage¢ñ	Upper lobe	0	930	Adenocarcinoma	Low	Low	Low
TCGA-55-A48X	female	white	>60	stage¢ñ	Lower lobe	0	689	Adenocarcinoma	High	High	High
TCGA-67-3774	female	white	>60	stage¢ñ	Lower lobe	0	385	Adenocarcinoma	High	High	Low
TCGA-67-3771	female	black or african american	>60	stage¢ñ	Upper lobe	0	610	Adenocarcinoma	Low	Low	High
TCGA-69-7978	male	white	<=60	stage¢ñ	Upper lobe	0	134	Adenocarcinoma	Low	High	Low
TCGA-55-8207	male	white	>60	stage¢ñ	Lower lobe	0	977	other	Low	Low	High
TCGA-77-8145	male	not reported	>60	stage¢ñ	Lung	1	212	Squamous cell carcinoma	Low	Low	High
TCGA-NJ-A55R	male	white	>60	stage¢ñ	Upper lobe	0	603	other	High	High	Low
TCGA-49-4507	female	white	>60	stage¢ñ	Main bronchus	1	268	Adenocarcinoma	Low	High	Low
TCGA-55-A48Z	female	white	<=60	stage¢ñ	Upper lobe	0	651	Adenocarcinoma	High	Low	High
TCGA-56-7582	male	white	>60	stage¢ñ	Lower lobe	0	601	Squamous cell carcinoma	Low	Low	Low
TCGA-56-8624	male	white	>60	stage¢ñ	Lower lobe	0	420	Squamous cell carcinoma	High	High	Low
TCGA-49-AAR9	male	black or african american	>60	stage¢ñ	Lung	1	260	Adenocarcinoma	Low	Low	High
TCGA-68-8251	male	white	>60	stage¢ñ	Upper lobe	0	406	Squamous cell carcinoma	Low	Low	Low
TCGA-52-7809	male	white	>60	stage¢ñ	Upper lobe	1	166	Squamous cell carcinoma	High	High	High
TCGA-49-4487	female	white	>60	stage¢ñ	Upper lobe	1	855	Adenocarcinoma	Low	Low	Low
TCGA-56-5897	male	white	>60	stage¢ñ	Upper lobe	0	378	Squamous cell carcinoma	High	High	Low
TCGA-77-7139	male	white	<=60	stage¢ñ	Lower lobe	0	4261	Squamous cell carcinoma	High	High	Low
TCGA-77-8131	male	not reported	>60	stage¢ñ	Lower lobe	1	383	Squamous cell carcinoma	High	High	Low
TCGA-56-A4ZJ	female	white	>60	stage¢ñ	Lower lobe	0	640	Squamous cell carcinoma	High	High	High
TCGA-50-5055	female	white	>60	stage¢ñ	Lower lobe	1	1830	Adenocarcinoma	High	Low	Low
TCGA-46-3767	male	white	>60	stage¢ñ	Lower lobe	0	396	Squamous cell carcinoma	Low	High	High
TCGA-75-7025	male	not reported	<=60	stage¢ñ	Lower lobe	0	3305	Adenocarcinoma	High	Low	Low
TCGA-60-2706	male	white	<=60	stage¢ñ	Lung	0	2820	Squamous cell carcinoma	High	High	Low
TCGA-55-8505	male	white	>60	stage¢ñ	Lower lobe	0	440	Adenocarcinoma	Low	Low	Low
TCGA-49-AARN	female	black or african american	<=60	stage¢ñ	Lower lobe	1	1135	Adenocarcinoma	Low	High	Low
TCGA-75-6206	male	not reported	<=60	stage¢ñ	Upper lobe	0	2590	Adenocarcinoma	Low	High	Low
TCGA-78-8655	female	not reported	>60	stage¢ñ	Lower lobe	0	2360	Adenocarcinoma	Low	Low	High
TCGA-56-A4BX	male	white	>60	stage¢ñ	Lower lobe	0	405	Squamous cell carcinoma	High	High	Low
TCGA-50-8459	male	white	>60	stage¢ñ	Lower lobe	0	1119	Adenocarcinoma	High	Low	High
TCGA-56-8628	male	white	>60	stage¢ñ	Upper lobe	0	616	Squamous cell carcinoma	High	High	Low
TCGA-44-7659	male	white	>60	stage¢ñ	Upper lobe	0	691	Adenocarcinoma	High	Low	High
TCGA-78-8662	female	not reported	<=60	stage¢ñ	Upper lobe	1	3361	Adenocarcinoma	Low	High	Low
TCGA-55-8299	female	white	>60	stage¢ñ	Upper lobe	1	469	Adenocarcinoma	Low	High	Low
TCGA-77-8156	male	not reported	<=60	stage¢ñ	Upper lobe	0	1106	Squamous cell carcinoma	Low	High	High
TCGA-50-5045	female	black or african american	<=60	stage¢ñ	Lower lobe	1	2174	Adenocarcinoma	Low	Low	High
TCGA-55-8085	male	white	>60	stage¢ñ	Lower lobe	0	904	Adenocarcinoma	Low	Low	Low
TCGA-78-7145	female	white	<=60	stage¢ñ	Middle lobe	1	826	Adenocarcinoma	Low	Low	High
TCGA-55-7914	female	white	>60	stage¢ñ	Upper lobe	1	187	Adenocarcinoma	High	Low	Low
TCGA-77-7465	male	white	<=60	stage¢ñ	Upper lobe	0	990	Squamous cell carcinoma	High	High	High
TCGA-69-7764	male	white	>60	stage¢ñ	Upper lobe	0	414	Adenocarcinoma	Low	High	Low
TCGA-44-6775	female	white	>60	stage¢ñ	Upper lobe	0	705	Adenocarcinoma	Low	Low	Low
TCGA-58-8387	male	white	<=60	stage¢ñ	Lower lobe	1	403	Squamous cell carcinoma	Low	Low	Low
TCGA-60-2715	male	white	<=60	stage¢ñ	Upper lobe	1	1075	Squamous cell carcinoma	High	High	Low
TCGA-55-6982	female	white	>60	stage¢ñ	Lower lobe	1	995	Adenocarcinoma	Low	High	High
TCGA-77-8128	male	not reported	<=60	stage¢ñ	Lung	1	1150	Squamous cell carcinoma	Low	High	Low
TCGA-56-8304	female	white	>60	stage¢ñ	Upper lobe	0	106	Squamous cell carcinoma	Low	Low	High
TCGA-56-A49D	male	white	>60	stage¢ñ	Upper lobe	0	637	Squamous cell carcinoma	High	Low	High
TCGA-55-7994	male	white	>60	stage¢ñ	Upper lobe	0	603	Adenocarcinoma	High	Low	High
TCGA-78-7633	male	white	>60	stage¢ñ	Upper lobe	1	1528	Adenocarcinoma	Low	High	High
TCGA-55-7995	female	white	>60	stage¢ñ	Upper lobe	0	889	Adenocarcinoma	Low	High	Low
TCGA-69-7980	female	white	>60	stage¢ñ	Upper lobe	0	411	Adenocarcinoma	High	High	High
TCGA-77-8153	female	not reported	>60	stage¢ñ	Lower lobe	0	1992	Squamous cell carcinoma	High	High	Low
TCGA-78-7143	female	white	>60	stage¢ñ	Upper lobe	1	4961	other	High	High	Low
TCGA-77-7337	male	white	>60	stage¢ñ	Lung	1	3253	Squamous cell carcinoma	Low	Low	Low
TCGA-56-7223	male	white	>60	stage¢ñ	Overlapping lesion of lung	1	442	Squamous cell carcinoma	High	High	Low
TCGA-77-8130	male	not reported	>60	stage¢ñ	Upper lobe	0	4765	Squamous cell carcinoma	Low	Low	Low
TCGA-50-5932	male	white	>60	stage¢ñ	Upper lobe	1	1235	Adenocarcinoma	Low	Low	Low
TCGA-67-3770	female	white	>60	stage¢ñ	Upper lobe	0	610	Adenocarcinoma	Low	High	Low
TCGA-58-A46M	male	white	>60	stage¢ñ	Lower lobe	0	1072	Squamous cell carcinoma	High	High	Low
TCGA-60-2725	male	white	>60	stage¢ñ	Upper lobe	0	816	Squamous cell carcinoma	High	High	Low
TCGA-83-5908	female	white	<=60	stage¢ñ	Upper lobe	0	824	Adenocarcinoma	High	Low	Low
TCGA-49-AARE	female	black or african american	<=60	stage¢ñ	Upper lobe	1	1229	Adenocarcinoma	High	High	Low
TCGA-56-7579	male	white	>60	stage¢ñ	Upper lobe	1	951	Squamous cell carcinoma	High	Low	Low
TCGA-44-7660	male	white	>60	stage¢ñ	Upper lobe	0	592	Adenocarcinoma	High	Low	Low
TCGA-56-8083	male	white	<=60	stage¢ñ	Upper lobe	0	150	Squamous cell carcinoma	Low	Low	Low
TCGA-55-8096	female	white	>60	stage¢ñ	Upper lobe	1	719	Adenocarcinoma	High	Low	Low
TCGA-55-7283	female	white	>60	stage¢ñ	Upper lobe	0	609	other	Low	High	High
TCGA-78-7166	male	white	>60	stage¢ñ	Lower lobe	1	258	Adenocarcinoma	Low	High	High
TCGA-55-7903	male	white	>60	stage¢ñ	Lower lobe	0	567	Adenocarcinoma	Low	High	High
TCGA-60-2708	female	white	>60	stage¢ñ	Lower lobe	0	2447	Squamous cell carcinoma	Low	Low	Low
TCGA-56-8305	male	white	>60	stage¢ñ	Upper lobe	0	105	Squamous cell carcinoma	Low	High	High
TCGA-77-8144	male	not reported	>60	stage¢ñ	Lower lobe	0	833	Squamous cell carcinoma	Low	High	Low
TCGA-56-A5DR	male	white	>60	stage¢ñ	Upper lobe	0	4	Squamous cell carcinoma	High	High	High
TCGA-77-A5FZ	male	not reported	>60	stage¢ñ	Upper lobe	1	3838	Squamous cell carcinoma	High	High	Low
TCGA-55-8087	female	white	<=60	stage¢ñ	Upper lobe	0	462	Adenocarcinoma	High	High	High
TCGA-73-4677	male	white	>60	stage¢ñ	Upper lobe	1	38	Adenocarcinoma	High	Low	High
TCGA-56-7580	male	white	>60	stage¢ñ	Lower lobe	0	925	Squamous cell carcinoma	Low	Low	Low
TCGA-78-7160	male	white	>60	stage¢ñ	Lower lobe	1	697	Adenocarcinoma	Low	High	High
TCGA-77-8138	male	not reported	>60	stage¢ñ	Upper lobe	1	539	Squamous cell carcinoma	Low	High	Low
TCGA-55-A490	male	white	>60	stage¢ñ	Upper lobe	1	99	Adenocarcinoma	Low	High	High
TCGA-55-6975	male	white	>60	stage¢ñ	Lower lobe	1	118	Adenocarcinoma	Low	Low	High
TCGA-55-6985	female	white	<=60	stage¢ñ	Upper lobe	0	1233	Adenocarcinoma	High	Low	Low
TCGA-52-7622	female	white	>60	stage¢ñ	Lower lobe	0	862	Squamous cell carcinoma	High	Low	Low
TCGA-55-6983	male	white	>60	stage¢ñ	Lower lobe	0	2823	Adenocarcinoma	High	Low	High
TCGA-55-8511	female	white	>60	stage¢ñ	Upper lobe	0	552	Adenocarcinoma	Low	High	High
TCGA-78-7220	female	white	<=60	stage¢ñ	Upper lobe	1	807	Adenocarcinoma	High	Low	Low
TCGA-55-6980	male	white	<=60	stage¢ñ	Lower lobe	0	2109	other	Low	Low	Low
TCGA-60-2707	male	not reported	>60	stage¢ñ	Upper lobe	1	667	Squamous cell carcinoma	Low	High	Low
TCGA-50-6590	female	white	>60	stage¢ñ	Upper lobe	1	1288	Adenocarcinoma	Low	High	High
TCGA-85-8353	male	white	>60	stage¢ñ	Lower lobe	1	94	Squamous cell carcinoma	Low	High	Low
TCGA-93-A4JQ	male	white	<=60	stage¢ñ	Upper lobe	0	526	other	High	High	Low
TCGA-96-7544	male	white	>60	stage¢ñ	Lower lobe	1	2160	Squamous cell carcinoma	Low	High	Low
TCGA-90-A4ED	male	white	>60	stage¢ñ	Upper lobe	0	615	Squamous cell carcinoma	High	Low	Low
TCGA-85-A512	male	white	<=60	stage¢ñ	Upper lobe	0	465	Squamous cell carcinoma	High	High	High
TCGA-97-8171	male	asian	>60	stage¢ñ	Overlapping lesion of lung	0	568	Adenocarcinoma	High	High	High
TCGA-NK-A5CX	male	white	>60	stage¢ñ	Lower lobe	0	111	Squamous cell carcinoma	Low	High	High
TCGA-86-7711	male	white	>60	stage¢ñ	Lower lobe	1	1046	Adenocarcinoma	Low	High	Low
TCGA-86-8056	female	white	>60	stage¢ñ	Upper lobe	0	139	Adenocarcinoma	High	Low	Low
TCGA-95-A4VP	female	white	>60	stage¢ñ	Lower lobe	0	605	other	Low	Low	Low
TCGA-91-8497	female	white	>60	stage¢ñ	Upper lobe	1	434	Adenocarcinoma	Low	Low	High
TCGA-92-8065	female	white	>60	stage¢ñ	Lower lobe	0	70	Squamous cell carcinoma	Low	High	High
TCGA-94-A5I6	male	white	>60	stage¢ñ	Lower lobe	0	538	Squamous cell carcinoma	High	High	Low
TCGA-85-A4PA	male	white	>60	stage¢ñ	Lower lobe	0	741	Squamous cell carcinoma	High	Low	Low
TCGA-85-A50Z	male	white	<=60	stage¢ñ	Upper lobe	0	493	Squamous cell carcinoma	Low	Low	Low
TCGA-85-A4JB	male	white	>60	stage¢ñ	Upper lobe	0	942	Squamous cell carcinoma	High	High	Low
TCGA-O2-A52Q	female	white	<=60	stage¢ñ	Upper lobe	1	113	Squamous cell carcinoma	Low	High	Low
TCGA-85-8287	male	white	>60	stage¢ñ	Upper lobe	1	23	Squamous cell carcinoma	High	High	Low
TCGA-91-6836	female	white	<=60	stage¢ñ	Upper lobe	0	417	Adenocarcinoma	Low	High	High
TCGA-86-8674	male	white	<=60	stage¢ñ	Middle lobe	0	806	Adenocarcinoma	Low	High	Low
TCGA-86-8075	female	white	>60	stage¢ñ	Upper lobe	1	694	Adenocarcinoma	Low	High	High
TCGA-90-7766	female	white	>60	stage¢ñ	Upper lobe	0	289	Squamous cell carcinoma	High	Low	Low
TCGA-85-8351	male	white	>60	stage¢ñ	Lower lobe	0	510	Squamous cell carcinoma	Low	Low	Low
TCGA-93-A4JP	male	asian	>60	stage¢ñ	Lower lobe	0	578	Adenocarcinoma	High	High	High
TCGA-O1-A52J	female	white	>60	stage¢ñ	Lower lobe	1	1798	Adenocarcinoma	Low	High	High
TCGA-94-A5I4	male	white	>60	stage¢ñ	Main bronchus	0	491	Squamous cell carcinoma	High	Low	Low
TCGA-94-8035	male	white	>60	stage¢ñ	Upper lobe	0	122	Squamous cell carcinoma	High	Low	Low
TCGA-96-8170	female	white	>60	stage¢ñ	Lower lobe	0	531	Squamous cell carcinoma	High	High	Low
TCGA-86-7954	female	white	>60	stage¢ñ	Lower lobe	0	605	Adenocarcinoma	Low	Low	Low
TCGA-86-A4D0	male	white	<=60	stage¢ñ	Upper lobe	1	116	Adenocarcinoma	Low	Low	Low
TCGA-85-8584	male	white	>60	stage¢ñ	Upper lobe	1	383	Squamous cell carcinoma	High	Low	Low
TCGA-85-7950	male	white	<=60	stage¢ñ	Upper lobe	0	576	Squamous cell carcinoma	High	Low	Low
TCGA-97-8174	male	white	>60	stage¢ñ	Upper lobe	1	164	Adenocarcinoma	Low	High	High
TCGA-NK-A5D1	male	white	<=60	stage¢ñ	Upper lobe	0	511	Squamous cell carcinoma	Low	Low	Low
TCGA-85-A50M	male	asian	<=60	stage¢ñ	Upper lobe	1	826	Squamous cell carcinoma	Low	Low	High
TCGA-86-8278	female	white	>60	stage¢ñ	Lower lobe	0	944	Adenocarcinoma	High	High	High
TCGA-97-7546	female	white	>60	stage¢ñ	Upper lobe	0	1285	other	High	High	Low
TCGA-97-8172	female	white	>60	stage¢ñ	Upper lobe	0	545	other	High	Low	Low
TCGA-97-7941	female	white	>60	stage¢ñ	Upper lobe	0	484	other	High	High	Low
TCGA-91-6835	female	white	>60	stage¢ñ	Lower lobe	0	79	Adenocarcinoma	High	High	Low
TCGA-90-7767	male	white	<=60	stage¢ñ	Upper lobe	0	89	Squamous cell carcinoma	Low	Low	Low
TCGA-95-7562	male	black or african american	>60	stage¢ñ	Lower lobe	1	87	Adenocarcinoma	High	Low	High
TCGA-S2-AA1A	female	black or african american	>60	stage¢ñ	Upper lobe	0	513	other	High	Low	Low
TCGA-85-8276	male	white	>60	stage¢ñ	Upper lobe	0	1050	Squamous cell carcinoma	Low	High	Low
TCGA-95-7043	female	white	>60	stage¢ñ	Upper lobe	1	503	Adenocarcinoma	Low	Low	Low
TCGA-96-8169	female	white	>60	stage¢ñ	Lower lobe	0	557	Squamous cell carcinoma	High	Low	Low
TCGA-93-8067	male	asian	>60	stage¢ñ	Lower lobe	0	186	Adenocarcinoma	High	High	Low
TCGA-92-7341	male	white	>60	stage¢ñ	Upper lobe	0	106	Squamous cell carcinoma	Low	High	Low
TCGA-95-7039	female	white	<=60	stage¢ñ	Upper lobe	0	1272	Adenocarcinoma	Low	Low	High
TCGA-97-8175	female	white	<=60	stage¢ñ	Upper lobe	0	551	other	Low	Low	Low
TCGA-XC-AA0X	female	black or african american	>60	stage¢ñ	Lower lobe	1	6	Squamous cell carcinoma	High	Low	High
TCGA-86-8073	male	white	<=60	stage¢ñ	Upper lobe	0	740	Adenocarcinoma	High	High	Low
TCGA-85-A511	male	white	>60	stage¢ñ	Lower lobe	1	455	Squamous cell carcinoma	High	Low	Low
TCGA-85-8580	female	white	<=60	stage¢ñ	Lower lobe	0	1113	Squamous cell carcinoma	High	Low	Low
TCGA-94-8491	male	white	>60	stage¢ñ	Lower lobe	0	810	Squamous cell carcinoma	High	High	Low
TCGA-90-6837	male	white	>60	stage¢ñ	Overlapping lesion of lung	0	758	Squamous cell carcinoma	High	High	High
TCGA-96-A4JK	male	white	>60	stage¢ñ	Upper lobe	0	589	Squamous cell carcinoma	High	High	High
TCGA-86-7953	female	white	>60	stage¢ñ	Upper lobe	0	997	Adenocarcinoma	High	High	Low
TCGA-93-A4JN	male	white	>60	stage¢ñ	Upper lobe	0	718	other	High	High	High
TCGA-86-8668	female	white	>60	stage¢ñ	Lower lobe	0	423	other	Low	High	Low
TCGA-97-7547	female	white	>60	stage¢ñ	Upper lobe	0	1965	Adenocarcinoma	Low	Low	Low
TCGA-85-7710	female	white	<=60	stage¢ñ	Upper lobe	0	42	Squamous cell carcinoma	High	Low	Low
TCGA-85-A5B5	male	white	<=60	stage¢ñ	Upper lobe	0	111	Squamous cell carcinoma	High	High	High
TCGA-94-7557	male	black or african american	>60	stage¢ñ	Upper lobe	1	5	Squamous cell carcinoma	High	High	Low
TCGA-85-8277	male	white	>60	stage¢ñ	Upper lobe	1	307	Squamous cell carcinoma	Low	High	Low
TCGA-85-7843	male	white	<=60	stage¢ñ	Upper lobe	0	35	Squamous cell carcinoma	High	High	Low
TCGA-91-8499	female	white	>60	stage¢ñ	Lower lobe	0	36	Adenocarcinoma	Low	Low	Low
TCGA-93-7347	female	white	>60	stage¢ñ	Upper lobe	0	683	Adenocarcinoma	High	Low	Low
TCGA-90-7769	male	white	<=60	stage¢ñ	Lung	0	358	Squamous cell carcinoma	Low	High	Low
TCGA-86-8280	female	white	<=60	stage¢ñ	Lower lobe	0	701	other	High	Low	High
TCGA-86-7714	female	black or african american	>60	stage¢ñ	Lower lobe	1	625	Adenocarcinoma	Low	High	Low
TCGA-86-A4P7	female	white	>60	stage¢ñ	Lower lobe	0	415	Adenocarcinoma	High	Low	Low
TCGA-91-6849	female	black or african american	>60	stage¢ñ	Upper lobe	0	35	Adenocarcinoma	Low	High	Low
TCGA-O2-A52N	male	white	>60	stage¢ñ	Upper lobe	1	1006	Squamous cell carcinoma	Low	High	High
TCGA-86-8585	male	white	<=60	stage¢ñ	Upper lobe	0	353	other	Low	High	High
TCGA-96-A4JL	female	asian	>60	stage¢ñ	Lower lobe	0	842	Squamous cell carcinoma	High	Low	High
TCGA-85-7844	male	white	>60	stage¢ñ	Upper lobe	0	911	Squamous cell carcinoma	Low	High	Low
TCGA-86-8279	male	white	<=60	stage¢ñ	Upper lobe	0	949	Adenocarcinoma	High	High	High
TCGA-91-6831	male	white	>60	stage¢ñ	Middle lobe	0	310	Adenocarcinoma	Low	High	Low
TCGA-O2-A52S	female	white	<=60	stage¢ñ	Lower lobe	1	387	Squamous cell carcinoma	High	High	High
TCGA-85-A4CL	male	white	>60	stage¢ñ	Lower lobe	1	921	Squamous cell carcinoma	High	Low	Low
TCGA-85-8664	male	white	>60	stage¢ñ	Upper lobe	1	550	Squamous cell carcinoma	Low	High	High
TCGA-85-A4JC	male	white	>60	stage¢ñ	Upper lobe	1	604	Squamous cell carcinoma	High	Low	High
TCGA-85-8052	male	white	<=60	stage¢ñ	Upper lobe	0	734	Squamous cell carcinoma	Low	High	Low
TCGA-86-6562	male	white	<=60	stage¢ñ	Upper lobe	1	376	Adenocarcinoma	Low	Low	High
TCGA-85-A53L	male	asian	>60	stage¢ñ	Middle lobe	0	377	Squamous cell carcinoma	Low	Low	High
TCGA-85-A4QR	male	white	>60	stage¢ñ	Upper lobe	0	600	Squamous cell carcinoma	High	High	Low
TCGA-97-7937	male	white	>60	stage¢ñ	Upper lobe	0	564	other	High	High	High
TCGA-93-7348	female	white	>60	stage¢ñ	Upper lobe	0	531	Adenocarcinoma	High	High	High
TCGA-85-A510	female	white	>60	stage¢ñ	Lower lobe	0	482	Squamous cell carcinoma	High	Low	Low
TCGA-NJ-A7XG	male	black or african american	<=60	stage¢ñ	Upper lobe	0	617	Adenocarcinoma	High	Low	Low
TCGA-85-8481	male	white	>60	stage¢ñ	Upper lobe	1	236	Squamous cell carcinoma	Low	Low	High
TCGA-85-8048	male	white	>60	stage¢ñ	Lower lobe	0	765	Squamous cell carcinoma	Low	Low	Low
TCGA-85-A4CN	female	white	<=60	stage¢ñ	Lower lobe	0	1038	Squamous cell carcinoma	High	High	High
TCGA-94-7943	male	white	>60	stage¢ñ	Lower lobe	0	559	Squamous cell carcinoma	High	High	Low
TCGA-93-A4JO	male	white	>60	stage¢ñ	Lower lobe	1	33	Adenocarcinoma	High	Low	Low
TCGA-O2-A52W	male	black or african american	>60	stage¢ñ	Lower lobe	1	261	Squamous cell carcinoma	Low	High	High
TCGA-85-8355	male	white	>60	stage¢ñ	Upper lobe	0	61	Squamous cell carcinoma	High	High	High
TCGA-86-A4P8	female	white	<=60	stage¢ñ	Lower lobe	0	805	Adenocarcinoma	High	Low	High
TCGA-94-7033	male	white	>60	stage¢ñ	Lower lobe	0	640	Squamous cell carcinoma	High	Low	Low
TCGA-86-8672	male	white	<=60	stage¢ñ	Upper lobe	1	19	Adenocarcinoma	Low	High	Low
TCGA-91-8496	female	white	>60	stage¢ñ	Lower lobe	0	505	other	Low	Low	High
TCGA-86-8359	male	white	<=60	stage¢ñ	Lower lobe	1	444	Adenocarcinoma	Low	Low	Low
TCGA-85-8352	male	white	>60	stage¢ñ	Upper lobe	1	161	Squamous cell carcinoma	Low	High	High
TCGA-94-A4VJ	female	white	>60	stage¢ñ	Main bronchus	0	430	Squamous cell carcinoma	High	High	Low
TCGA-95-7567	male	white	>60	stage¢ñ	Upper lobe	0	568	Adenocarcinoma	Low	High	Low
TCGA-95-7948	female	white	<=60	stage¢ñ	Lower lobe	0	476	Adenocarcinoma	High	High	Low
TCGA-95-A4VK	female	white	>60	stage¢ñ	Upper lobe	0	651	Adenocarcinoma	Low	High	Low
TCGA-86-6851	female	white	>60	stage¢ñ	Upper lobe	0	179	Adenocarcinoma	High	Low	Low
TCGA-92-7340	female	white	<=60	stage¢ñ	Upper lobe	0	82	Squamous cell carcinoma	Low	High	Low
TCGA-85-8072	male	white	<=60	stage¢ñ	Upper lobe	0	932	Squamous cell carcinoma	Low	Low	Low
TCGA-85-8070	male	white	>60	stage¢ñ	Upper lobe	0	960	Squamous cell carcinoma	High	High	Low
TCGA-85-8049	male	white	<=60	stage¢ñ	Lower lobe	0	579	Squamous cell carcinoma	High	High	Low
TCGA-95-7947	male	white	>60	stage¢ñ	Upper lobe	0	477	Adenocarcinoma	High	High	Low
TCGA-86-8673	male	white	>60	stage¢ñ	Upper lobe	0	862	other	Low	High	Low
TCGA-85-A4QQ	male	white	>60	stage¢ñ	Lower lobe	1	927	Squamous cell carcinoma	High	High	High
TCGA-86-A4JF	male	white	<=60	stage¢ñ	Upper lobe	1	737	Adenocarcinoma	Low	High	Low
TCGA-O2-A52V	female	black or african american	>60	stage¢ñ	Upper lobe	1	1335	Squamous cell carcinoma	Low	High	Low
TCGA-85-8582	male	white	<=60	stage¢ñ	Upper lobe	0	1160	Squamous cell carcinoma	Low	High	High
TCGA-97-7553	female	white	<=60	stage¢ñ	Lower lobe	0	1870	other	High	High	Low
TCGA-91-6840	female	white	<=60	stage¢ñ	Upper lobe	0	372	Adenocarcinoma	High	Low	Low
TCGA-85-8666	male	white	>60	stage¢ñ	Upper lobe	1	687	Squamous cell carcinoma	Low	Low	High
TCGA-86-8074	female	white	>60	stage¢ñ	Lower lobe	0	24	Adenocarcinoma	High	Low	Low
TCGA-85-8354	male	white	<=60	stage¢ñ	Lower lobe	0	995	Squamous cell carcinoma	High	High	Low
TCGA-91-6848	male	white	<=60	stage¢ñ	Upper lobe	0	224	Adenocarcinoma	Low	Low	Low
TCGA-91-6847	female	white	>60	stage¢ñ	Lower lobe	0	842	Adenocarcinoma	Low	Low	Low
TCGA-90-A59Q	female	white	>60	stage¢ñ	Upper lobe	1	322	Squamous cell carcinoma	High	High	High
TCGA-85-8350	male	white	>60	stage¢ñ	Upper lobe	0	683	Squamous cell carcinoma	High	High	Low
TCGA-NK-A5CT	male	white	>60	stage¢ñ	Lower lobe	0	1997	Squamous cell carcinoma	High	Low	Low
TCGA-86-8358	male	white	<=60	stage¢ñ	Upper lobe	0	653	Adenocarcinoma	Low	Low	High
TCGA-91-7771	male	white	>60	stage¢ñ	Upper lobe	0	492	Adenocarcinoma	Low	High	Low
TCGA-95-A4VN	female	white	>60	stage¢ñ	Lower lobe	0	553	other	High	Low	Low
TCGA-86-7701	male	white	>60	stage¢ñ	Upper lobe	0	947	Adenocarcinoma	Low	High	Low
TCGA-85-A513	female	asian	<=60	stage¢ñ	Upper lobe	0	910	Squamous cell carcinoma	Low	Low	Low
TCGA-86-8669	male	white	>60	stage¢ñ	Upper lobe	0	938	Adenocarcinoma	Low	High	Low
TCGA-86-8054	male	white	>60	stage¢ñ	Upper lobe	0	1148	other	High	High	High
TCGA-92-8064	male	white	<=60	stage¢ñ	Upper lobe	0	160	Squamous cell carcinoma	Low	Low	High
TCGA-92-8063	male	white	<=60	stage¢ñ	Upper lobe	0	122	Squamous cell carcinoma	Low	High	High
TCGA-86-8671	female	white	>60	stage¢ñ	Upper lobe	0	839	Adenocarcinoma	High	High	Low
TCGA-95-8494	male	white	>60	stage¢ñ	Middle lobe	0	84	Adenocarcinoma	Low	High	Low
TCGA-95-7944	male	white	>60	stage¢ñ	Lower lobe	0	377	Adenocarcinoma	High	High	Low
TCGA-85-8288	male	white	>60	stage¢ñ	Middle lobe	1	402	Squamous cell carcinoma	High	Low	Low
TCGA-86-A456	female	asian	>60	stage¢ñ	Upper lobe	0	896	Adenocarcinoma	High	High	High
TCGA-NK-A5CR	male	not reported	>60	stage¢ñ	Upper lobe	0	2542	Squamous cell carcinoma	Low	High	Low
TCGA-96-7545	male	white	>60	stage¢ñ	Lower lobe	1	1736	Squamous cell carcinoma	Low	High	Low
TCGA-97-7554	female	white	>60	stage¢ñ	Lower lobe	0	775	Adenocarcinoma	Low	Low	Low
TCGA-91-6829	male	white	>60	stage¢ñ	Lower lobe	1	1258	other	Low	Low	Low
TCGA-91-A4BC	male	white	<=60	stage¢ñ	Upper lobe	0	44	Adenocarcinoma	High	High	High
TCGA-86-8055	male	white	>60	stage¢ñ	Upper lobe	1	124	Adenocarcinoma	Low	Low	High
TCGA-NK-A7XE	male	black or african american	>60	stage¢ñ	Upper lobe	0	13	Squamous cell carcinoma	High	Low	High
TCGA-85-8479	male	white	>60	stage¢ñ	Lower lobe	0	468	Squamous cell carcinoma	High	Low	Low
TCGA-90-A4EE	male	white	<=60	stage¢ñ	Main bronchus	0	688	Squamous cell carcinoma	Low	High	High
TCGA-91-6828	male	white	>60	stage¢ñ	Lower lobe	0	323	Adenocarcinoma	Low	High	High
TCGA-94-8490	male	white	>60	stage¢ñ	Upper lobe	0	153	Squamous cell carcinoma	High	Low	High
TCGA-91-A4BD	male	white	>60	stage¢ñ	Lower lobe	0	603	Adenocarcinoma	High	Low	Low
TCGA-86-7713	male	white	>60	stage¢ñ	Middle lobe	0	1157	Adenocarcinoma	High	High	Low
TCGA-O2-A5IB	female	white	>60	stage¢ñ	Middle lobe	1	340	Squamous cell carcinoma	High	High	High
TCGA-90-7964	male	white	>60	stage¢ñ	Upper lobe	0	428	Squamous cell carcinoma	High	Low	High
TCGA-85-8071	male	white	<=60	stage¢ñ	Upper lobe	0	815	Squamous cell carcinoma	High	Low	High
TCGA-97-7552	male	white	>60	stage¢ñ	Lower lobe	0	1932	other	High	Low	Low
TCGA-95-8039	male	white	>60	stage¢ñ	Upper lobe	0	830	other	High	High	High
TCGA-86-8076	male	white	<=60	stage¢ñ	Upper lobe	0	993	Adenocarcinoma	High	High	High
TCGA-86-7955	male	white	>60	stage¢ñ	Lower lobe	0	1072	Adenocarcinoma	High	Low	Low
TCGA-91-6830	female	white	>60	stage¢ñ	Upper lobe	0	60	Adenocarcinoma	Low	Low	High
TCGA-L9-A5IP	female	black or african american	<=60	stage ii	Upper lobe	1	58	Adenocarcinoma	High	Low	High
TCGA-98-8023	male	white	>60	stage ii	Lung	0	649	Squamous cell carcinoma	Low	High	Low
TCGA-MN-A4N5	male	white	>60	stage ii	Upper lobe	0	84	Adenocarcinoma	High	High	Low
TCGA-97-A4LX	male	white	>60	stage ii	Upper lobe	0	614	Adenocarcinoma	High	High	Low
TCGA-L9-A50W	male	black or african american	>60	stage ii	Lower lobe	1	442	Adenocarcinoma	High	Low	Low
TCGA-97-8176	male	white	>60	stage ii	Lower lobe	1	468	other	High	High	High
TCGA-98-A53I	male	white	>60	stage ii	Upper lobe	0	565	Squamous cell carcinoma	High	Low	Low
TCGA-MP-A5C7	female	white	>60	stage ii	Upper lobe	0	2248	Adenocarcinoma	Low	High	Low
TCGA-NC-A5HD	male	white	>60	stage ii	Upper lobe	1	2	Squamous cell carcinoma	Low	High	High
TCGA-J2-A4AD	female	white	>60	stage ii	Upper lobe	1	550	Adenocarcinoma	High	Low	High
TCGA-NJ-A4YF	female	black or african american	<=60	stage ii	Upper lobe	0	2161	Adenocarcinoma	High	Low	Low
TCGA-MP-A4T7	female	not reported	>60	stage ii	Lower lobe	1	167	Adenocarcinoma	High	Low	Low
TCGA-99-8032	male	white	>60	stage ii	Upper lobe	0	44	Adenocarcinoma	High	High	Low
TCGA-NC-A5HI	female	white	>60	stage ii	Lower lobe	0	1743	Squamous cell carcinoma	Low	High	High
TCGA-MP-A4SY	male	white	>60	stage ii	Lower lobe	1	1501	Adenocarcinoma	High	Low	High
TCGA-98-A53D	male	white	>60	stage ii	Upper lobe	1	645	Squamous cell carcinoma	High	High	Low
TCGA-L9-A8F4	female	black or african american	>60	stage ii	Upper lobe	0	476	Adenocarcinoma	High	High	Low
TCGA-NC-A5HR	female	white	>60	stage ii	Lower lobe	0	1244	Squamous cell carcinoma	High	Low	Low
TCGA-MP-A4TD	male	white	>60	stage ii	Lower lobe	1	307	Adenocarcinoma	High	High	High
TCGA-LA-A446	male	white	>60	stage ii	Lower lobe	0	401	Squamous cell carcinoma	High	Low	High
TCGA-J2-A4AG	female	white	>60	stage ii	Upper lobe	0	988	Adenocarcinoma	Low	High	High
TCGA-NC-A5HL	male	white	>60	stage ii	Upper lobe	1	88	Squamous cell carcinoma	Low	Low	High
TCGA-97-8179	male	white	>60	stage ii	Upper lobe	0	435	other	Low	Low	Low
TCGA-99-8025	female	black or african american	>60	stage ii	Upper lobe	0	1060	Adenocarcinoma	High	Low	Low
TCGA-MF-A522	male	white	<=60	stage ii	Upper lobe	1	360	Squamous cell carcinoma	Low	High	Low
TCGA-NJ-A4YP	male	white	<=60	stage ii	Lower lobe	0	50	Adenocarcinoma	High	Low	Low
TCGA-MP-A4TF	female	white	<=60	stage ii	Upper lobe	1	336	Adenocarcinoma	Low	High	Low
TCGA-97-A4M6	female	white	<=60	stage ii	Lower lobe	0	568	Adenocarcinoma	High	Low	Low
TCGA-NC-A5HK	female	white	<=60	stage ii	Overlapping lesion of lung	0	128	Squamous cell carcinoma	High	High	High
TCGA-NC-A5HQ	male	white	>60	stage ii	Middle lobe	1	448	Squamous cell carcinoma	High	Low	High
TCGA-NJ-A4YG	male	white	>60	stage ii	Upper lobe	0	2261	Adenocarcinoma	Low	High	Low
TCGA-MP-A4SV	male	not reported	>60	stage ii	Lower lobe	1	2620	Adenocarcinoma	High	Low	High
TCGA-MP-A4T9	female	white	<=60	stage ii	Upper lobe	1	1265	Adenocarcinoma	Low	High	High
TCGA-98-A53J	male	white	>60	stage ii	Upper lobe	0	630	Squamous cell carcinoma	Low	High	Low
TCGA-MP-A4TJ	female	not reported	>60	stage ii	Upper lobe	1	339	other	High	Low	High
TCGA-NJ-A4YI	female	white	>60	stage ii	Upper lobe	1	4	other	High	Low	High
TCGA-NC-A5HN	male	white	>60	stage ii	Lower lobe	0	1499	Squamous cell carcinoma	High	High	Low
TCGA-NC-A5HM	male	white	>60	stage ii	Upper lobe	0	1212	Squamous cell carcinoma	Low	Low	Low
TCGA-97-A4M3	female	white	>60	stage ii	Upper lobe	0	540	Adenocarcinoma	Low	High	Low
TCGA-NC-A5HF	male	white	>60	stage ii	Lower lobe	1	138	Squamous cell carcinoma	High	Low	Low
TCGA-99-7458	female	white	>60	stage ii	Lower lobe	0	747	other	High	Low	Low
TCGA-MP-A4T6	female	white	>60	stage ii	Lower lobe	1	1790	Adenocarcinoma	High	Low	Low
TCGA-NJ-A4YQ	female	white	>60	stage ii	Upper lobe	0	1432	Adenocarcinoma	High	Low	High
TCGA-98-A53H	female	white	>60	stage ii	Upper lobe	0	618	Squamous cell carcinoma	High	Low	High
TCGA-NC-A5HT	male	white	>60	stage ii	Overlapping lesion of lung	0	804	Squamous cell carcinoma	High	High	Low
TCGA-97-8177	female	white	<=60	stage ii	Lower lobe	0	499	Adenocarcinoma	Low	Low	Low
TCGA-98-A53A	male	black or african american	>60	stage ii	Middle lobe	1	552	Squamous cell carcinoma	High	Low	Low
TCGA-MP-A4SW	male	white	<=60	stage ii	Upper lobe	1	1778	Adenocarcinoma	High	High	Low
TCGA-L9-A7SV	male	black or african american	>60	stage ii	Lower lobe	0	565	Adenocarcinoma	High	High	Low
TCGA-97-A4M5	male	white	>60	stage ii	Upper lobe	0	634	Adenocarcinoma	High	High	High
TCGA-NC-A5HH	male	white	<=60	stage ii	Lower lobe	0	37	Squamous cell carcinoma	High	High	Low
TCGA-J2-8192	female	white	>60	stage ii	Upper lobe	0	739	Adenocarcinoma	High	High	Low
TCGA-NJ-A55A	female	white	>60	stage ii	Lower lobe	0	15	other	High	Low	Low
TCGA-99-8033	female	white	>60	stage ii	Upper lobe	1	656	Adenocarcinoma	Low	Low	Low
TCGA-L4-A4E6	male	white	>60	stage ii	Upper lobe	0	435	Adenocarcinoma	Low	High	High
TCGA-MP-A4TE	male	white	<=60	stage ii	Lower lobe	1	896	Adenocarcinoma	Low	High	Low
TCGA-98-8022	male	white	>60	stage ii	Upper lobe	1	933	Squamous cell carcinoma	High	Low	High
TCGA-NC-A5HG	male	white	<=60	stage ii	Lower lobe	0	1963	Squamous cell carcinoma	High	Low	Low
TCGA-L9-A443	female	white	>60	stage ii	Lower lobe	1	193	Adenocarcinoma	Low	Low	High
TCGA-L9-A444	female	white	<=60	stage ii	Upper lobe	0	307	Adenocarcinoma	Low	High	Low
TCGA-LA-A7SW	male	black or african american	>60	stage ii	Upper lobe	1	408	Squamous cell carcinoma	High	Low	High
TCGA-MP-A4TI	male	white	>60	stage ii	Lower lobe	1	429	Adenocarcinoma	High	High	Low
TCGA-98-A538	male	white	>60	stage ii	Upper lobe	0	826	Squamous cell carcinoma	Low	Low	High
TCGA-NC-A5HO	female	white	>60	stage ii	Upper lobe	0	1336	Squamous cell carcinoma	Low	High	Low
TCGA-MP-A4TH	female	white	>60	stage ii	Lower lobe	0	741	Adenocarcinoma	High	High	Low
TCGA-97-8547	female	not reported	>60	stage ii	Lower lobe	0	657	other	Low	Low	Low
TCGA-L9-A743	male	black or african american	<=60	stage ii	Upper lobe	0	664	Adenocarcinoma	High	High	High
TCGA-99-AA5R	female	black or african american	>60	stage ii	Lower lobe	0	658	Adenocarcinoma	High	High	High
TCGA-NC-A5HE	male	white	<=60	stage ii	Upper lobe	0	2336	Squamous cell carcinoma	High	Low	Low
TCGA-J1-A4AH	male	white	>60	stage ii	Lower lobe	0	581	Squamous cell carcinoma	Low	Low	Low
TCGA-98-8020	female	black or african american	<=60	stage ii	Upper lobe	1	84	Squamous cell carcinoma	Low	High	High
TCGA-NC-A5HP	male	white	>60	stage ii	Upper lobe	1	770	Squamous cell carcinoma	High	Low	Low
TCGA-98-8021	female	white	>60	stage ii	Upper lobe	0	937	Squamous cell carcinoma	High	Low	Low
TCGA-97-A4M2	male	white	>60	stage ii	Middle lobe	0	624	Adenocarcinoma	High	Low	Low
TCGA-97-A4M0	female	white	<=60	stage ii	Upper lobe	0	652	Adenocarcinoma	High	High	High
TCGA-MP-A4T8	male	not reported	>60	stage ii	Upper lobe	1	161	Adenocarcinoma	Low	High	High
TCGA-MP-A4TK	female	not reported	<=60	stage ii	Lower lobe	1	582	Adenocarcinoma	Low	High	High
TCGA-J2-A4AE	female	white	>60	stage ii	Upper lobe	0	1079	Adenocarcinoma	High	High	High
TCGA-NC-A5HJ	male	white	<=60	stage ii	Middle lobe	1	418	Squamous cell carcinoma	High	Low	High
TCGA-97-A4M7	male	white	>60	stage ii	Middle lobe	0	629	Adenocarcinoma	High	High	Low
TCGA-L3-A524	female	white	<=60	stage ii	Upper lobe	1	490	Squamous cell carcinoma	High	Low	Low
TCGA-98-A53C	female	white	>60	stage ii	Lower lobe	0	822	Squamous cell carcinoma	High	High	Low
TCGA-MN-A4N4	male	white	<=60	stage ii	Upper lobe	0	1175	Adenocarcinoma	High	Low	Low
TCGA-L4-A4E5	female	white	<=60	stage ii	Upper lobe	0	578	Adenocarcinoma	Low	High	High
TCGA-97-A4M1	female	white	<=60	stage ii	Upper lobe	0	601	Adenocarcinoma	High	Low	Low
TCGA-MP-A4TC	male	white	>60	stage ii	Middle lobe	1	74	Adenocarcinoma	Low	Low	High
TCGA-J2-8194	female	white	>60	stage ii	Lower lobe	0	724	Adenocarcinoma	High	Low	High
TCGA-98-A53B	male	white	>60	stage ii	Upper lobe	1	61	Squamous cell carcinoma	High	Low	High
TCGA-MN-A4N1	male	black or african american	<=60	stage ii	Upper lobe	0	827	Adenocarcinoma	Low	Low	Low
TCGA-98-7454	male	white	>60	stage ii	Upper lobe	0	652	Squamous cell carcinoma	Low	Low	Low
TCGA-97-8552	female	white	<=60	stage ii	Lower lobe	0	626	other	High	High	Low
TCGA-NJ-A55O	female	white	<=60	stage ii	Upper lobe	0	13	Adenocarcinoma	Low	High	High
TCGA-98-A539	male	white	>60	stage ii	Upper lobe	0	173	Squamous cell carcinoma	High	High	Low
TCGA-99-8028	female	black or african american	<=60	stage ii	Upper lobe	0	1118	Adenocarcinoma	High	High	High
TCGA-L3-A4E7	male	white	>60	stage ii	Lower lobe	0	392	Squamous cell carcinoma	High	High	High
TCGA-MP-A4TA	female	white	>60	stage ii	Upper lobe	1	950	Adenocarcinoma	High	High	Low
TCGA-MP-A4T4	female	white	>60	stage ii	Lower lobe	1	2617	Adenocarcinoma	High	High	High
TCGA-22-5473	male	white	>60	stage ii	Lower lobe	1	1933	Squamous cell carcinoma	Low	High	Low
TCGA-64-1677	female	white	>60	stage ii	Lower lobe	1	628	Adenocarcinoma	Low	High	High
TCGA-22-5492	female	not reported	>60	stage ii	Upper lobe	1	506	Squamous cell carcinoma	Low	High	High
TCGA-66-2755	male	not reported	>60	stage ii	Upper lobe	0	28	Squamous cell carcinoma	Low	High	Low
TCGA-22-1000	male	white	>60	stage ii	Lung	1	454	Squamous cell carcinoma	High	High	Low
TCGA-66-2765	male	not reported	>60	stage ii	Lower lobe	0	61	Squamous cell carcinoma	Low	Low	Low
TCGA-63-A5MN	female	not reported	>60	stage ii	Upper lobe	1	345	Squamous cell carcinoma	Low	High	High
TCGA-22-4594	female	not reported	<=60	stage ii	Upper lobe	1	1470	Squamous cell carcinoma	Low	High	Low
TCGA-18-4086	male	not reported	>60	stage ii	Lower lobe	1	85	Squamous cell carcinoma	Low	Low	Low
TCGA-38-7271	female	white	>60	stage ii	Upper lobe	1	800	Adenocarcinoma	Low	High	Low
TCGA-22-4609	male	white	>60	stage ii	Upper lobe	1	291	Squamous cell carcinoma	High	High	Low
TCGA-63-A5MI	male	not reported	>60	stage ii	Lower lobe	0	1784	Squamous cell carcinoma	Low	High	Low
TCGA-66-2737	male	not reported	>60	stage ii	Middle lobe	0	61	Squamous cell carcinoma	High	High	Low
TCGA-22-1017	male	white	>60	stage ii	Lung	1	1485	Squamous cell carcinoma	High	Low	Low
TCGA-43-7658	female	white	>60	stage ii	Upper lobe	1	2378	Squamous cell carcinoma	High	Low	Low
TCGA-66-2778	female	not reported	>60	stage ii	Lower lobe	0	578	Squamous cell carcinoma	Low	High	Low
TCGA-62-A46S	male	white	>60	stage ii	Upper lobe	1	1653	Adenocarcinoma	High	High	Low
TCGA-33-4589	female	white	>60	stage ii	Lung	1	47	Squamous cell carcinoma	Low	Low	Low
TCGA-43-6143	male	white	>60	stage ii	Lower lobe	0	699	Squamous cell carcinoma	High	Low	High
TCGA-63-A5ML	male	not reported	>60	stage ii	Lower lobe	0	1386	Squamous cell carcinoma	Low	Low	Low
TCGA-64-5775	male	white	>60	stage ii	Upper lobe	1	62	Adenocarcinoma	Low	Low	High
TCGA-22-A5C4	male	white	>60	stage ii	Lower lobe	0	671	Squamous cell carcinoma	High	Low	Low
TCGA-22-5471	male	white	>60	stage ii	Lower lobe	0	1845	Squamous cell carcinoma	Low	High	Low
TCGA-22-5480	female	white	>60	stage ii	Upper lobe	1	2170	Squamous cell carcinoma	Low	Low	Low
TCGA-34-8455	male	white	>60	stage ii	Upper lobe	1	123	Squamous cell carcinoma	Low	Low	Low
TCGA-22-4591	male	white	>60	stage ii	Lower lobe	1	623	Squamous cell carcinoma	High	High	Low
TCGA-66-2788	male	not reported	<=60	stage ii	Lower lobe	0	699	Squamous cell carcinoma	High	High	Low
TCGA-37-A5EL	male	white	<=60	stage ii	Upper lobe	1	1143	Squamous cell carcinoma	High	High	High
TCGA-64-5815	male	white	>60	stage ii	Upper lobe	0	866	Adenocarcinoma	Low	High	Low
TCGA-22-5483	male	white	>60	stage ii	Upper lobe	1	573	Squamous cell carcinoma	High	High	Low
TCGA-18-3414	male	asian	>60	stage ii	Lower lobe	1	716	Squamous cell carcinoma	High	Low	Low
TCGA-66-2789	male	not reported	>60	stage ii	Lower lobe	1	123	Squamous cell carcinoma	Low	High	Low
TCGA-05-4433	male	not reported	>60	stage ii	Lower lobe	0	730	Adenocarcinoma	Low	Low	Low
TCGA-38-6178	female	white	>60	stage ii	Upper lobe	0	448	Adenocarcinoma	Low	High	High
TCGA-33-4586	male	white	<=60	stage ii	Lower lobe	1	428	Squamous cell carcinoma	Low	High	High
TCGA-66-2790	male	not reported	>60	stage ii	Upper lobe	0	699	Squamous cell carcinoma	High	High	High
TCGA-66-2734	female	not reported	>60	stage ii	Lower lobe	0	1311	Squamous cell carcinoma	High	Low	Low
TCGA-22-5477	male	white	>60	stage ii	Lower lobe	1	1346	Squamous cell carcinoma	High	Low	Low
TCGA-39-5021	male	white	>60	stage ii	Upper lobe	1	2086	Squamous cell carcinoma	Low	High	Low
TCGA-21-5784	female	white	>60	stage ii	Upper lobe	0	1268	Squamous cell carcinoma	High	High	Low
TCGA-33-AASB	male	black or african american	>60	stage ii	Upper lobe	1	211	Squamous cell carcinoma	High	Low	Low
TCGA-18-5592	male	not reported	<=60	stage ii	Upper lobe	0	1519	Squamous cell carcinoma	Low	Low	Low
TCGA-22-0940	male	white	>60	stage ii	Lung	1	669	Squamous cell carcinoma	Low	Low	Low
TCGA-64-5781	female	white	<=60	stage ii	Upper lobe	0	1559	Adenocarcinoma	Low	High	High
TCGA-44-3918	female	white	<=60	stage ii	Upper lobe	0	1036	Adenocarcinoma	High	High	Low
TCGA-05-5423	male	not reported	>60	stage ii	Lung	0	151	Adenocarcinoma	Low	Low	Low
TCGA-62-A472	male	white	>60	stage ii	Lower lobe	0	910	Adenocarcinoma	Low	Low	Low
TCGA-34-5241	male	white	>60	stage ii	Lower lobe	1	515	Squamous cell carcinoma	Low	High	High
TCGA-22-5491	male	white	>60	stage ii	Lower lobe	1	1713	Squamous cell carcinoma	High	Low	High
TCGA-39-5016	male	white	<=60	stage ii	Lower lobe	0	3850	Squamous cell carcinoma	Low	High	High
TCGA-22-4593	male	white	>60	stage ii	Lower lobe	1	1067	Squamous cell carcinoma	High	Low	Low
TCGA-33-A5GW	male	white	>60	stage ii	Lower lobe	1	9	Squamous cell carcinoma	Low	High	Low
TCGA-37-A5EN	male	white	<=60	stage ii	Middle lobe	0	660	Squamous cell carcinoma	High	High	Low
TCGA-62-8398	male	white	<=60	stage ii	Lower lobe	1	444	Adenocarcinoma	Low	Low	Low
TCGA-05-5425	male	not reported	>60	stage ii	Lung	0	882	Adenocarcinoma	Low	Low	Low
TCGA-44-3398	female	white	>60	stage ii	Lower lobe	0	1163	Adenocarcinoma	High	High	Low
TCGA-63-A5MB	male	not reported	>60	stage ii	Upper lobe	0	3123	Squamous cell carcinoma	High	High	Low
TCGA-66-2768	male	not reported	<=60	stage ii	Lower lobe	0	61	Squamous cell carcinoma	High	High	High
TCGA-22-0944	male	white	>60	stage ii	Lung	1	223	Squamous cell carcinoma	High	Low	Low
TCGA-43-6770	female	black or african american	<=60	stage ii	Upper lobe	0	653	Squamous cell carcinoma	High	High	Low
TCGA-44-2661	female	white	>60	stage ii	Upper lobe	0	1159	Adenocarcinoma	High	Low	Low
TCGA-37-3783	male	white	<=60	stage ii	Upper lobe	0	122	Squamous cell carcinoma	Low	Low	Low
TCGA-43-5668	male	white	>60	stage ii	Upper lobe	1	559	Squamous cell carcinoma	High	Low	Low
TCGA-62-A471	male	white	>60	stage ii	Upper lobe	0	1246	Adenocarcinoma	High	High	Low
TCGA-37-4129	female	white	<=60	stage ii	Middle lobe	0	242	Squamous cell carcinoma	High	Low	High
TCGA-39-5022	male	white	>60	stage ii	Upper lobe	1	1679	Squamous cell carcinoma	High	Low	Low
TCGA-33-A4WN	male	white	<=60	stage ii	Upper lobe	1	143	Squamous cell carcinoma	Low	High	Low
TCGA-66-2773	male	not reported	>60	stage ii	Lower lobe	1	92	Squamous cell carcinoma	High	Low	High
TCGA-66-2727	female	not reported	<=60	stage ii	Lower lobe	1	516	Squamous cell carcinoma	Low	High	Low
TCGA-43-7657	female	white	>60	stage ii	Upper lobe	0	236	Squamous cell carcinoma	Low	High	Low
TCGA-39-5037	male	white	>60	stage ii	Lower lobe	0	1690	Squamous cell carcinoma	High	Low	High
TCGA-34-2608	male	white	>60	stage ii	Upper lobe	1	1000	Squamous cell carcinoma	High	Low	Low
TCGA-62-A46Y	female	white	>60	stage ii	Lower lobe	1	414	Adenocarcinoma	High	High	Low
TCGA-62-8397	female	white	>60	stage ii	Lower lobe	0	1289	Adenocarcinoma	Low	Low	Low
TCGA-18-3419	male	not reported	>60	stage ii	Lower lobe	0	2811	Squamous cell carcinoma	High	Low	High
TCGA-63-A5MY	male	not reported	>60	stage ii	Lower lobe	0	1052	Squamous cell carcinoma	High	High	High
TCGA-63-7023	male	not reported	<=60	stage ii	Lower lobe	0	1682	Squamous cell carcinoma	Low	Low	Low
TCGA-21-1079	male	white	>60	stage ii	Upper lobe	1	965	Squamous cell carcinoma	Low	High	Low
TCGA-33-4582	male	white	<=60	stage ii	Lower lobe	1	3149	Squamous cell carcinoma	Low	High	Low
TCGA-43-6771	male	white	>60	stage ii	Upper lobe	1	166	Squamous cell carcinoma	Low	Low	Low
TCGA-18-3412	male	white	<=60	stage ii	Lower lobe	1	345	Squamous cell carcinoma	Low	High	Low
TCGA-43-5670	male	white	>60	stage ii	Lower lobe	0	849	Squamous cell carcinoma	High	Low	Low
TCGA-39-5036	male	white	>60	stage ii	Upper lobe	0	2165	Squamous cell carcinoma	Low	Low	High
TCGA-33-AAS8	female	black or african american	<=60	stage ii	Upper lobe	1	1114	Squamous cell carcinoma	Low	High	Low
TCGA-34-5231	male	white	>60	stage ii	Upper lobe	1	1984	Squamous cell carcinoma	High	Low	Low
TCGA-34-5239	male	white	>60	stage ii	Upper lobe	0	1834	Squamous cell carcinoma	Low	High	High
TCGA-22-4599	female	white	>60	stage ii	Overlapping lesion of lung	1	1161	Squamous cell carcinoma	Low	Low	High
TCGA-62-A46V	female	white	>60	stage ii	Lower lobe	0	2199	Adenocarcinoma	High	High	High
TCGA-63-7021	male	not reported	<=60	stage ii	Upper lobe	0	2142	Squamous cell carcinoma	High	High	High
TCGA-66-2785	male	not reported	>60	stage ii	Upper lobe	0	60	Squamous cell carcinoma	High	High	Low
TCGA-66-2794	male	not reported	>60	stage ii	Upper lobe	0	1645	Squamous cell carcinoma	High	Low	Low
TCGA-66-2783	male	not reported	>60	stage ii	Lower lobe	0	759	Squamous cell carcinoma	High	Low	Low
TCGA-39-5029	male	white	>60	stage ii	Lower lobe	1	740	Squamous cell carcinoma	High	Low	Low
TCGA-18-3407	male	asian	>60	stage ii	Upper lobe	1	136	Squamous cell carcinoma	High	High	High
TCGA-63-6202	male	not reported	<=60	stage ii	Upper lobe	0	1602	Squamous cell carcinoma	Low	High	Low
TCGA-63-A5MT	male	not reported	>60	stage ii	Upper lobe	0	498	Squamous cell carcinoma	Low	Low	Low
TCGA-38-4630	female	white	>60	stage ii	Upper lobe	1	1073	Adenocarcinoma	High	High	Low
TCGA-43-A56U	female	white	>60	stage ii	Upper lobe	0	432	Squamous cell carcinoma	High	Low	Low
TCGA-62-A470	male	white	>60	stage ii	Upper lobe	1	1194	other	Low	Low	High
TCGA-38-4625	female	white	>60	stage ii	Upper lobe	0	2973	Adenocarcinoma	High	High	Low
TCGA-34-5236	male	white	<=60	stage ii	Upper lobe	1	276	Squamous cell carcinoma	Low	High	Low
TCGA-21-1083	male	white	>60	stage ii	Upper lobe	1	1315	Squamous cell carcinoma	High	Low	Low
TCGA-21-1070	female	black or african american	<=60	stage ii	Upper lobe	0	3636	Squamous cell carcinoma	High	High	Low
TCGA-39-5030	female	asian	>60	stage ii	Lower lobe	1	59	Squamous cell carcinoma	Low	Low	Low
TCGA-18-4721	male	white	>60	stage ii	Lower lobe	0	4694	Squamous cell carcinoma	Low	High	Low
TCGA-05-5428	male	not reported	<=60	stage ii	Lung	0	670	Adenocarcinoma	Low	High	Low
TCGA-66-2793	male	not reported	>60	stage ii	Middle lobe	1	306	Squamous cell carcinoma	Low	Low	Low
TCGA-22-5474	male	white	>60	stage ii	Upper lobe	1	445	Squamous cell carcinoma	Low	Low	High
TCGA-66-2791	male	not reported	>60	stage ii	Lower lobe	1	153	Squamous cell carcinoma	High	High	High
TCGA-39-5034	female	white	>60	stage ii	Upper lobe	1	1107	Squamous cell carcinoma	Low	Low	High
TCGA-21-5787	male	black or african american	>60	stage ii	Upper lobe	1	329	Squamous cell carcinoma	Low	Low	Low
TCGA-37-4133	male	white	>60	stage ii	Lung	0	238	Squamous cell carcinoma	Low	High	Low
TCGA-43-2581	female	white	<=60	stage ii	Upper lobe	0	1176	Squamous cell carcinoma	Low	High	Low
TCGA-34-5240	female	white	>60	stage ii	Upper lobe	0	1541	Squamous cell carcinoma	Low	High	High
TCGA-44-3396	female	white	>60	stage ii	Upper lobe	0	1130	Adenocarcinoma	High	High	Low
TCGA-21-1082	male	white	>60	stage ii	Lower lobe	0	3644	Squamous cell carcinoma	High	High	High
TCGA-66-2766	male	not reported	<=60	stage ii	Upper lobe	0	31	Squamous cell carcinoma	Low	Low	Low
TCGA-33-6737	male	white	>60	stage ii	Upper lobe	1	601	Squamous cell carcinoma	Low	High	Low
TCGA-34-8456	female	white	>60	stage ii	Lower lobe	0	804	Squamous cell carcinoma	High	Low	High
TCGA-43-3920	male	white	>60	stage ii	Upper lobe	0	1007	Squamous cell carcinoma	High	Low	Low
TCGA-37-4130	male	white	<=60	stage ii	Upper lobe	0	247	Squamous cell carcinoma	Low	High	High
TCGA-66-2754	male	not reported	>60	stage ii	Upper lobe	0	61	Squamous cell carcinoma	Low	High	Low
TCGA-44-2657	female	white	>60	stage ii	Upper lobe	0	1351	Adenocarcinoma	High	Low	Low
TCGA-64-1678	female	white	>60	stage ii	Middle lobe	0	1189	Adenocarcinoma	Low	Low	Low
TCGA-33-4532	male	white	>60	stage ii	Lower lobe	1	3924	Squamous cell carcinoma	High	Low	Low
TCGA-21-1080	male	white	>60	stage ii	Lower lobe	0	3724	Squamous cell carcinoma	Low	Low	Low
TCGA-63-A5MG	male	not reported	>60	stage ii	Lower lobe	0	2148	Squamous cell carcinoma	High	High	High
TCGA-37-5819	male	white	>60	stage ii	Upper lobe	0	103	Squamous cell carcinoma	High	High	Low
TCGA-21-1081	male	white	>60	stage ii	Lower lobe	1	284	Squamous cell carcinoma	High	High	High
TCGA-63-A5MM	female	not reported	>60	stage ii	Overlapping lesion of lung	1	456	Squamous cell carcinoma	Low	High	Low
TCGA-66-2786	female	not reported	>60	stage ii	Upper lobe	0	790	Squamous cell carcinoma	High	High	Low
TCGA-34-5232	female	black or african american	>60	stage ii	Upper lobe	0	2471	Squamous cell carcinoma	High	High	High
TCGA-18-3415	male	not reported	>60	stage ii	Upper lobe	1	2803	Squamous cell carcinoma	Low	Low	Low
TCGA-63-7022	female	not reported	<=60	stage ii	Upper lobe	0	2073	Squamous cell carcinoma	Low	Low	Low
TCGA-43-A475	female	white	>60	stage ii	Upper lobe	0	296	Squamous cell carcinoma	High	Low	Low
TCGA-34-8454	female	white	>60	stage ii	Lower lobe	0	1180	Squamous cell carcinoma	High	High	Low
TCGA-21-1071	male	white	>60	stage ii	Upper lobe	1	1426	Squamous cell carcinoma	High	Low	Low
TCGA-22-5485	female	white	<=60	stage ii	Upper lobe	1	916	Squamous cell carcinoma	Low	Low	Low
TCGA-43-6773	male	white	>60	stage ii	Middle lobe	1	116	Squamous cell carcinoma	Low	Low	Low
TCGA-44-2655	female	white	>60	stage ii	Upper lobe	0	1324	Adenocarcinoma	High	Low	High
TCGA-34-5929	female	white	>60	stage ii	Upper lobe	1	151	Squamous cell carcinoma	High	Low	Low
TCGA-21-5782	female	white	>60	stage ii	Lower lobe	1	962	Squamous cell carcinoma	High	Low	High
TCGA-34-7107	male	white	>60	stage ii	Lower lobe	1	34	Squamous cell carcinoma	High	High	Low
TCGA-22-1002	male	white	>60	stage ii	Lung	1	131	Squamous cell carcinoma	Low	High	Low
TCGA-05-5715	female	not reported	>60	stage ii	Upper lobe	0	62	Adenocarcinoma	Low	Low	High
TCGA-38-4631	female	white	>60	stage ii	Upper lobe	1	354	Adenocarcinoma	Low	High	Low
TCGA-18-4083	male	white	>60	stage ii	Lower lobe	1	188	Squamous cell carcinoma	High	Low	Low
TCGA-33-AASD	male	black or african american	>60	stage ii	Lower lobe	1	2249	Squamous cell carcinoma	High	Low	Low
TCGA-21-1078	male	white	>60	stage ii	Lower lobe	1	474	Squamous cell carcinoma	High	Low	Low
TCGA-62-A46O	female	white	>60	stage ii	Lower lobe	1	1454	Adenocarcinoma	Low	Low	Low
TCGA-63-A5MR	female	not reported	>60	stage ii	Upper lobe	0	2716	Squamous cell carcinoma	High	Low	Low
TCGA-38-4627	female	white	>60	stage ii	Upper lobe	1	1147	Adenocarcinoma	High	High	Low
TCGA-33-4583	male	white	>60	stage ii	Lower lobe	1	4601	Squamous cell carcinoma	Low	Low	High
TCGA-33-4587	female	white	>60	stage ii	Middle lobe	1	1656	Squamous cell carcinoma	High	Low	High
TCGA-38-4628	female	white	>60	stage ii	Upper lobe	1	1492	Adenocarcinoma	Low	Low	Low
TCGA-43-2576	female	white	>60	stage ii	Upper lobe	0	1223	Squamous cell carcinoma	Low	High	High
TCGA-37-4132	female	white	>60	stage ii	Lower lobe	0	227	Squamous cell carcinoma	High	Low	High
TCGA-64-1680	male	white	>60	stage ii	Overlapping lesion of lung	0	1126	Adenocarcinoma	High	High	High
TCGA-22-4595	male	white	<=60	stage ii	Lower lobe	1	734	Squamous cell carcinoma	High	Low	High
TCGA-34-5234	female	white	>60	stage ii	Upper lobe	0	2271	Squamous cell carcinoma	High	Low	Low
TCGA-22-1011	male	white	>60	stage ii	Lung	1	53	Squamous cell carcinoma	Low	Low	Low
TCGA-63-A5MJ	male	not reported	<=60	stage ii	Lung	0	1824	Squamous cell carcinoma	Low	High	Low
TCGA-05-5429	male	not reported	<=60	stage ii	Lung	1	275	Adenocarcinoma	High	Low	Low
TCGA-37-4135	male	white	>60	stage ii	Lower lobe	0	207	Squamous cell carcinoma	High	High	Low
TCGA-33-4533	female	black or african american	>60	stage ii	Lung	0	4068	Squamous cell carcinoma	Low	High	Low
TCGA-39-5039	male	white	>60	stage ii	Upper lobe	1	544	Squamous cell carcinoma	Low	High	Low
TCGA-43-A56V	male	black or african american	>60	stage ii	Middle lobe	0	366	Squamous cell carcinoma	High	Low	Low
TCGA-43-8116	male	white	>60	stage ii	Upper lobe	0	358	Squamous cell carcinoma	Low	High	High
TCGA-33-AASI	female	black or african american	>60	stage ii	Lower lobe	1	1344	Squamous cell carcinoma	Low	Low	Low
TCGA-22-4605	female	not reported	>60	stage ii	Upper lobe	1	974	Squamous cell carcinoma	High	High	Low
TCGA-43-2578	female	white	<=60	stage ii	Upper lobe	1	684	Squamous cell carcinoma	High	Low	Low
TCGA-63-A5MP	male	not reported	<=60	stage ii	Lower lobe	0	769	Squamous cell carcinoma	High	High	High
TCGA-21-1077	male	white	>60	stage ii	Upper lobe	1	1058	Squamous cell carcinoma	Low	Low	Low
TCGA-66-2777	male	not reported	>60	stage ii	Middle lobe	0	61	Squamous cell carcinoma	High	High	Low
TCGA-63-A5MW	male	not reported	>60	stage ii	Upper lobe	0	1639	Squamous cell carcinoma	High	Low	Low
TCGA-63-7020	male	not reported	<=60	stage ii	Upper lobe	0	2133	Squamous cell carcinoma	Low	Low	High
TCGA-66-2792	male	not reported	<=60	stage ii	Lower lobe	0	913	Squamous cell carcinoma	High	Low	High
TCGA-66-2758	male	not reported	>60	stage ii	Upper lobe	0	639	Squamous cell carcinoma	High	Low	Low
TCGA-34-A5IX	male	white	>60	stage ii	Lower lobe	0	1031	Squamous cell carcinoma	Low	Low	Low
TCGA-35-3615	male	white	<=60	stage ii	Upper lobe	0	14	Adenocarcinoma	High	Low	Low
TCGA-22-4604	male	white	>60	stage ii	Upper lobe	1	399	Squamous cell carcinoma	High	Low	Low
TCGA-38-4632	male	black or african american	<=60	stage ii	Upper lobe	1	1357	Adenocarcinoma	Low	Low	Low
TCGA-21-A5DI	male	white	>60	stage ii	Lower lobe	0	979	Squamous cell carcinoma	Low	Low	Low
TCGA-66-2763	female	not reported	>60	stage ii	Upper lobe	0	30	Squamous cell carcinoma	High	High	Low
TCGA-63-A5MS	male	not reported	>60	stage ii	Upper lobe	0	2381	Squamous cell carcinoma	Low	High	Low
TCGA-66-2770	male	not reported	>60	stage ii	Lower lobe	0	700	Squamous cell carcinoma	High	High	High
TCGA-37-4141	female	white	>60	stage ii	Upper lobe	0	12	Squamous cell carcinoma	High	Low	Low
TCGA-18-3421	male	white	>60	stage ii	Lower lobe	0	2645	Squamous cell carcinoma	Low	High	Low
TCGA-64-1676	male	white	<=60	stage ii	Lower lobe	0	1728	Adenocarcinoma	Low	Low	High
TCGA-18-3410	male	not reported	>60	stage ii	Lower lobe	1	146	Squamous cell carcinoma	High	High	Low
TCGA-37-3792	male	white	>60	stage ii	Upper lobe	0	12	Squamous cell carcinoma	High	Low	High
TCGA-44-2668	male	white	<=60	stage ii	Upper lobe	1	761	Adenocarcinoma	Low	High	High
TCGA-35-4123	male	white	<=60	stage ii	Upper lobe	0	182	Adenocarcinoma	Low	High	High
TCGA-22-5479	male	white	>60	stage ii	Lower lobe	1	2625	Squamous cell carcinoma	High	Low	High
TCGA-22-1016	male	white	>60	stage ii	Lung	1	822	Squamous cell carcinoma	High	Low	High
TCGA-43-8115	female	white	>60	stage ii	Lower lobe	0	407	Squamous cell carcinoma	Low	High	Low
TCGA-66-2757	female	not reported	>60	stage ii	Upper lobe	1	1338	Squamous cell carcinoma	High	Low	Low
TCGA-22-4601	female	white	>60	stage ii	Upper lobe	1	1057	Squamous cell carcinoma	Low	Low	Low
TCGA-33-AASL	female	black or african american	<=60	stage ii	Upper lobe	1	826	Squamous cell carcinoma	High	High	Low
TCGA-62-A46R	female	white	<=60	stage ii	Lower lobe	1	1725	Adenocarcinoma	High	Low	Low
TCGA-22-1005	male	white	>60	stage ii	Lung	1	1953	Squamous cell carcinoma	High	Low	Low
TCGA-64-1681	female	white	>60	stage ii	Lung	1	1167	Adenocarcinoma	High	Low	High
TCGA-18-3406	male	white	>60	stage ii	Upper lobe	1	371	Squamous cell carcinoma	Low	Low	Low
TCGA-33-4566	male	white	<=60	stage ii	Upper lobe	1	5287	Squamous cell carcinoma	Low	High	Low
TCGA-62-A46P	male	white	>60	stage ii	Upper lobe	1	594	Adenocarcinoma	Low	High	Low
TCGA-66-2756	male	not reported	>60	stage ii	Upper lobe	0	30	Squamous cell carcinoma	Low	High	High
TCGA-39-5031	female	not reported	>60	stage ii	Upper lobe	1	1841	Squamous cell carcinoma	High	Low	Low
TCGA-37-A5EM	male	white	<=60	stage ii	Upper lobe	0	867	Squamous cell carcinoma	Low	High	Low
TCGA-38-4629	male	white	>60	stage ii	Upper lobe	1	864	Adenocarcinoma	Low	Low	Low
TCGA-33-6738	male	white	>60	stage ii	Upper lobe	0	1927	Squamous cell carcinoma	Low	High	Low
TCGA-22-5481	female	white	>60	stage ii	Lower lobe	1	2409	Squamous cell carcinoma	Low	Low	Low
TCGA-22-1012	female	white	>60	stage ii	Lung	1	429	Squamous cell carcinoma	Low	Low	Low
TCGA-62-8395	female	white	>60	stage ii	Upper lobe	0	1216	Adenocarcinoma	Low	High	Low
TCGA-39-5024	female	white	>60	stage ii	Lung	0	2510	Squamous cell carcinoma	High	Low	Low
TCGA-22-5489	male	white	>60	stage ii	Upper lobe	1	1912	Squamous cell carcinoma	Low	Low	High
TCGA-22-4596	female	white	>60	stage ii	Upper lobe	1	17	Squamous cell carcinoma	High	Low	High
TCGA-39-5035	female	white	>60	stage ii	Lower lobe	0	2080	Squamous cell carcinoma	High	Low	Low
TCGA-44-2656	male	white	<=60	stage ii	Upper lobe	0	1429	Adenocarcinoma	High	High	Low
TCGA-44-4112	female	white	<=60	stage ii	Upper lobe	1	808	Adenocarcinoma	Low	Low	High
TCGA-66-2781	male	not reported	>60	stage ii	Upper lobe	0	121	Squamous cell carcinoma	High	High	High
TCGA-43-3394	male	black or african american	<=60	stage ii	Lower lobe	1	1190	Squamous cell carcinoma	High	Low	Low
TCGA-22-5482	male	white	>60	stage ii	Upper lobe	1	357	Squamous cell carcinoma	Low	Low	High
TCGA-22-5478	male	not reported	>60	stage ii	Lower lobe	1	24	Squamous cell carcinoma	High	High	High
TCGA-44-2662	male	white	>60	stage ii	Upper lobe	0	1280	Adenocarcinoma	Low	High	High
TCGA-35-5375	male	white	>60	stage ii	Upper lobe	0	264	Adenocarcinoma	Low	Low	High
TCGA-64-1679	female	white	<=60	stage ii	Upper lobe	0	2488	Adenocarcinoma	Low	Low	Low
TCGA-37-3789	male	white	>60	stage ii	Upper lobe	0	13	Squamous cell carcinoma	High	High	High
TCGA-66-2759	male	not reported	>60	stage ii	Lower lobe	0	762	Squamous cell carcinoma	Low	High	Low
TCGA-64-5778	male	white	<=60	stage ii	Upper lobe	0	1305	other	Low	High	High
TCGA-63-A5MV	male	not reported	>60	stage ii	Lower lobe	0	1100	Squamous cell carcinoma	High	High	Low
TCGA-66-2782	male	not reported	>60	stage ii	Upper lobe	1	365	Squamous cell carcinoma	High	Low	High
TCGA-44-2666	male	white	<=60	stage ii	Upper lobe	1	97	Adenocarcinoma	Low	Low	Low
TCGA-62-8399	male	white	>60	stage ii	Upper lobe	0	2696	Adenocarcinoma	Low	High	Low
TCGA-38-A44F	male	white	>60	stage ii	Upper lobe	0	133	other	High	Low	Low
TCGA-22-5472	male	white	>60	stage ii	Lower lobe	1	1975	Squamous cell carcinoma	High	High	Low
TCGA-66-2767	male	not reported	>60	stage ii	Lower lobe	0	61	Squamous cell carcinoma	High	Low	Low
TCGA-18-3411	female	not reported	>60	stage ii	Upper lobe	0	3576	Squamous cell carcinoma	Low	Low	Low
TCGA-43-A474	male	white	>60	stage ii	Upper lobe	0	353	Squamous cell carcinoma	High	Low	High
TCGA-18-3409	male	white	>60	stage ii	Upper lobe	0	3747	Squamous cell carcinoma	High	High	High
TCGA-39-5011	female	white	>60	stage ii	Lung	0	4053	Squamous cell carcinoma	Low	Low	Low
TCGA-64-5774	male	white	<=60	stage ii	Main bronchus	0	2676	Adenocarcinoma	Low	High	Low
TCGA-18-3416	male	not reported	>60	stage ii	Upper lobe	1	973	Squamous cell carcinoma	High	Low	Low
TCGA-44-2665	female	white	<=60	stage ii	Upper lobe	0	1301	Adenocarcinoma	High	Low	High
TCGA-33-4538	male	white	>60	stage ii	Upper lobe	1	2979	Squamous cell carcinoma	High	High	High
TCGA-18-3408	female	white	>60	stage ii	Lower lobe	1	2304	Squamous cell carcinoma	Low	Low	High
TCGA-66-2742	male	not reported	>60	stage ii	Upper lobe	0	641	Squamous cell carcinoma	Low	High	Low
TCGA-21-5786	male	white	>60	stage ii	Upper lobe	0	1032	Squamous cell carcinoma	Low	High	High
TCGA-34-5928	female	white	>60	stage ii	Lower lobe	0	1196	Squamous cell carcinoma	Low	High	Low
TCGA-21-1075	male	white	<=60	stage ii	Lower lobe	0	2134	Squamous cell carcinoma	Low	Low	Low
TCGA-35-4122	male	white	>60	stage ii	Upper lobe	0	225	Adenocarcinoma	Low	High	Low
TCGA-34-5927	female	white	>60	stage ii	Lower lobe	0	1361	Squamous cell carcinoma	High	Low	Low
TCGA-33-4547	male	white	>60	stage ii	Upper lobe	0	2419	Squamous cell carcinoma	High	High	Low
TCGA-05-4432	male	not reported	>60	stage ii	Upper lobe	0	761	Adenocarcinoma	Low	Low	Low
TCGA-18-5595	male	not reported	<=60	stage ii	Lower lobe	1	827	Squamous cell carcinoma	High	High	Low
TCGA-05-5420	male	not reported	>60	stage ii	Lung	0	457	Adenocarcinoma	Low	Low	Low
TCGA-39-5027	male	white	>60	stage ii	Lower lobe	0	3108	Squamous cell carcinoma	High	Low	High
TCGA-39-5040	male	white	<=60	stage ii	Upper lobe	1	519	Squamous cell carcinoma	Low	Low	Low
TCGA-22-4613	female	white	>60	stage ii	Upper lobe	1	358	Squamous cell carcinoma	Low	Low	Low
TCGA-66-2780	male	not reported	>60	stage ii	Upper lobe	1	366	Squamous cell carcinoma	High	Low	High
TCGA-05-4434	female	not reported	>60	stage ii	Lower lobe	1	457	Adenocarcinoma	High	Low	High
TCGA-44-3919	female	white	>60	stage ii	Upper lobe	1	1026	Adenocarcinoma	High	Low	Low
TCGA-38-4626	female	white	<=60	stage ii	Upper lobe	0	3674	Adenocarcinoma	High	Low	Low
TCGA-43-7656	male	white	>60	stage ii	Lower lobe	0	596	Squamous cell carcinoma	High	Low	Low
TCGA-34-2600	female	white	>60	stage ii	Lower lobe	1	1874	Squamous cell carcinoma	High	Low	Low
TCGA-39-5028	male	white	>60	stage ii	Upper lobe	1	52	Squamous cell carcinoma	High	Low	High
TCGA-44-3917	female	white	<=60	stage ii	Upper lobe	0	1183	Adenocarcinoma	Low	Low	High
TCGA-34-2596	male	white	>60	stage ii	Main bronchus	1	80	Squamous cell carcinoma	High	High	High
TCGA-43-6647	female	white	>60	stage ii	Lower lobe	0	757	Squamous cell carcinoma	Low	High	High
TCGA-21-1076	female	white	<=60	stage ii	Lower lobe	0	1852	Squamous cell carcinoma	High	High	Low
TCGA-33-AASJ	male	black or african american	<=60	stage ii	Upper lobe	1	3600	Squamous cell carcinoma	High	High	High
TCGA-22-4607	male	white	>60	stage ii	Lower lobe	1	587	Squamous cell carcinoma	High	Low	Low
TCGA-66-2787	male	not reported	<=60	stage ii	Upper lobe	0	1217	Squamous cell carcinoma	High	Low	Low
TCGA-66-2769	male	not reported	>60	stage ii	Upper lobe	1	215	Squamous cell carcinoma	Low	Low	Low
TCGA-64-5779	male	white	>60	stage ii	Lower lobe	0	864	other	High	Low	Low
TCGA-18-3417	male	not reported	>60	stage ii	Lung	1	1097	Squamous cell carcinoma	Low	High	Low
TCGA-44-2659	female	white	>60	stage ii	Lower lobe	0	1367	Adenocarcinoma	Low	High	Low
TCGA-43-8118	female	white	<=60	stage ii	Upper lobe	1	89	Squamous cell carcinoma	High	High	High
TCGA-66-2744	male	not reported	>60	stage ii	Lower lobe	0	30	Squamous cell carcinoma	Low	Low	Low
TCGA-63-A5MH	male	not reported	>60	stage ii	Lower lobe	0	2026	Squamous cell carcinoma	High	High	High
TCGA-39-5019	male	white	>60	stage ii	Upper lobe	0	3387	Squamous cell carcinoma	High	High	Low
TCGA-21-1072	male	white	>60	stage ii	Lung	0	3016	Squamous cell carcinoma	High	High	High
TCGA-66-2753	male	not reported	>60	stage ii	Lower lobe	0	31	Squamous cell carcinoma	Low	Low	Low
TCGA-66-2771	male	not reported	<=60	stage ii	Upper lobe	0	578	Squamous cell carcinoma	Low	Low	Low
TCGA-21-5783	male	white	>60	stage ii	Upper lobe	1	2680	Squamous cell carcinoma	High	Low	Low
