# Supplementary material for: Comprehensive Analysis of Alteration Landscape and Its Clinical Significance of Mitochondrial Energy Metabolism Pathway-Related Genes in Lung Cancers
Source: Oxid Med Cell Longev. 2021 Dec 20;2021:9259297. doi: 10.1155/2021/9259297 (PMC8713050; doi:10.1155/2021/9259297)
Supplement: Supplementary 16 — Supplementary Table 7: difference analysis of survival-related differentially expressed MMRGs in dataset GSE21933. [file 9259297.f16.txt]

Supplementary Table 7. Difference analysis of three survival-related differentially expressed MMRGs in dataset GSE21933.
Gene	adj.P.Val	P.Value	logFC	ORF	Foldchange
GAPDHS	0.699347939	0.529541462	0.212817314	ENSG00000105679	1.158949187
ACSBG1	0.006942333	0.001155249	0.811277576	ENSG00000103740	1.754764684
CYP4A11	0.782971318	0.640596807	0.09359061	ENSG00000187048	1.067022508
