# Supplementary material for: Comprehensive Analysis of Alteration Landscape and Its Clinical Significance of Mitochondrial Energy Metabolism Pathway-Related Genes in Lung Cancers
Source: Oxid Med Cell Longev. 2021 Dec 20;2021:9259297. doi: 10.1155/2021/9259297 (PMC8713050; doi:10.1155/2021/9259297)
Supplement: Supplementary 17 — Supplementary Table 8: four-differentially expressed MMRG-signature model for lung cancer diagnosis. [file 9259297.f17.txt]

Supplementary Table 5. Four-differentialy expressed MMRG-signature model for lung cancer diagnosis
class	ACADL	ALDH18A1	CPT1B	PPARG
normal	691	1360	12	1235
normal	1389	1282	5	1315
normal	2292	3787	16	4270
normal	3173	4980	119	3813
normal	709	2198	25	1569
normal	1269	1589	23	6591
normal	2048	3441	148	2689
normal	957	2883	107	3576
normal	1529	934	42	1974
normal	1053	1188	38	1265
normal	916	892	6	1124
normal	2561	3350	43	4774
normal	1059	1284	18	2598
normal	717	563	15	787
normal	962	1244	8	2071
normal	1388	1842	71	2899
normal	2933	2329	55	3937
normal	1865	1131	32	978
normal	2471	2539	58	3259
normal	1399	736	47	864
normal	736	1318	40	3122
normal	1922	3915	16	3277
normal	468	1379	13	1651
normal	1225	1475	57	11375
normal	2191	2633	78	6791
normal	4896	2400	41	6000
normal	1062	1480	32	4707
normal	1710	2860	69	1784
normal	1364	2917	38	3066
normal	608	1890	11	2076
normal	1348	1414	20	1825
normal	1398	2405	126	3850
normal	1562	1745	35	2535
normal	702	1432	61	1645
normal	1305	1046	57	2308
normal	998	1603	69	1336
normal	1251	3316	17	2911
normal	690	969	52	5423
normal	1642	2999	50	3141
normal	959	2800	76	3707
normal	1822	1990	38	1750
normal	1072	1153	46	1146
normal	1297	895	32	906
normal	1420	985	21	872
normal	1139	1108	48	896
normal	1188	1846	23	2333
normal	724	937	3	679
normal	1053	1392	23	1876
normal	517	817	1	1945
normal	1324	873	44	924
normal	2355	2903	83	5435
normal	765	936	24	2206
normal	1223	3503	52	1367
normal	487	1979	30	380
normal	970	2252	10	1592
normal	1256	1162	25	1679
normal	1426	3809	31	3748
normal	1677	1772	18	2530
normal	517	1655	6	2347
normal	1412	2199	22	1259
normal	1011	2997	11	1236
normal	221	3436	23	2590
normal	2605	2307	23	1965
normal	1444	5397	29	5605
normal	820	1055	93	1139
normal	1367	3375	16	1886
normal	675	946	22	984
normal	668	1237	4	1685
normal	1504	3025	33	3114
normal	919	1442	92	2519
normal	940	1185	22	2155
normal	2073	5250	428	10736
normal	852	828	12	1033
normal	1247	1001	27	1217
normal	815	2481	15	1693
normal	2425	1437	50	6499
normal	1352	835	13	1717
normal	1318	935	60	1457
normal	430	4981	86	2302
normal	947	1157	9	2907
normal	1856	2294	36	1417
normal	735	744	13	1205
normal	1116	1264	0	2220
normal	501	1409	59	1625
normal	1345	1102	13	1458
normal	1078	1091	20	1943
normal	1706	1097	44	1735
normal	1615	1100	64	2745
normal	2351	1735	48	5581
normal	1338	1481	27	1960
normal	2098	2511	28	5255
normal	1601	1880	19	1394
normal	291	1924	23	2090
normal	1748	2233	53	3867
normal	1052	1532	11	3742
normal	2359	1716	32	1971
normal	1334	2081	6	4814
normal	978	849	5	938
normal	1001	2309	24	2437
normal	1976	3355	82	2886
normal	1139	3410	15	3788
normal	754	3683	34	3275
normal	1055	2260	31	3366
normal	538	1340	55	2401
normal	1145	2420	85	3280
normal	1108	5616	22	3941
normal	954	1328	12	2031
cancer	157	3544	257	1696
cancer	214	8612	60	1714
cancer	8	6616	47	3435
cancer	244	6650	107	1621
cancer	9	10226	108	1264
cancer	37	3832	143	1296
cancer	171	3370	32	130
cancer	123	6828	32	1289
cancer	141	4974	27	401
cancer	139	4495	33	761
cancer	75	12548	31	505
cancer	210	10144	103	486
cancer	3	14761	27	1501
cancer	31	6063	207	399
cancer	35	7877	38	394
cancer	73	5592	24	369
cancer	475	5278	181	281
cancer	76	6370	201	2170
cancer	92	9198	126	874
cancer	18	9303	120	84
cancer	121	4086	117	553
cancer	418	3010	42	279
cancer	0	3089	59	4284
cancer	655	10141	105	1458
cancer	6	5721	159	670
cancer	241	9398	183	135
cancer	11	8253	211	3937
cancer	457	4855	15	638
cancer	552	6233	57	640
cancer	218	4680	664	234
cancer	13	8753	109	845
cancer	270	4377	100	1042
cancer	797	6837	136	1664
cancer	174	8125	355	1100
cancer	34	9926	308	2326
cancer	47	5657	278	590
cancer	26	1846	134	141
cancer	300	13389	37	1178
cancer	221	4291	462	409
cancer	24	3671	158	308
cancer	195	2038	29	1582
cancer	30	2790	8	607
cancer	6	5724	185	554
cancer	719	5828	30	3553
cancer	96	3391	756	214
cancer	28	3939	299	543
cancer	189	7838	515	1024
cancer	348	5767	194	271
cancer	37	4873	11	320
cancer	59	3973	43	98
cancer	73	3266	189	233
cancer	61	2744	167	173
cancer	71	3317	29	480
cancer	21	2570	47	62
cancer	11	6027	57	1673
cancer	0	5243	22	1352
cancer	9	5049	134	195
cancer	522	3258	315	583
cancer	68	5159	27	704
cancer	159	13710	112	2663
cancer	62	4523	65	359
cancer	28	5165	98	928
cancer	61	3624	889	425
cancer	2	8840	298	1178
cancer	150	2744	227	564
cancer	70	14945	783	150
cancer	989	8410	122	2454
cancer	35	5161	87	919
cancer	0	5307	189	5
cancer	4	3707	410	6
cancer	483	15186	24	200
cancer	12	14145	168	129
cancer	111	10212	404	926
cancer	14	5515	868	96
cancer	78	5336	126	278
cancer	16	3771	398	782
cancer	266	5269	424	353
cancer	41	6685	364	1236
cancer	27	11353	193	991
cancer	60	3462	30	85
cancer	126	3665	111	173
cancer	42	5199	127	319
cancer	330	3785	148	242
cancer	114	3500	336	1153
cancer	105	6112	354	1756
cancer	24	2500	129	397
cancer	6	3284	128	8
cancer	140	7092	356	145
cancer	15	5386	195	140
cancer	19	8615	484	633
cancer	1200	6430	46	178
cancer	209	5461	427	2479
cancer	0	7094	63	1355
cancer	74	3510	84	938
cancer	89	3688	28	666
cancer	12	4308	11	463
cancer	121	5171	685	601
cancer	120	10400	333	1010
cancer	724	6480	90	729
cancer	130	5753	47	870
cancer	10	3417	9	74
cancer	13	6882	183	2710
cancer	19	8564	175	48
cancer	37	4970	288	310
cancer	7	2016	229	704
cancer	101	1643	70	262
cancer	168	2729	293	631
cancer	351	7917	104	666
cancer	89	8909	9	1010
cancer	52	4280	104	413
cancer	27	8604	36	354
cancer	9	5564	144	2062
cancer	47	8464	59	1585
cancer	113	3287	246	144
cancer	75	5604	144	719
cancer	1013	3078	629	423
cancer	4	6636	22	3793
cancer	24	2110	78	242
cancer	41	5447	105	1006
cancer	6	5220	20	1335
cancer	610	6427	82	1051
cancer	1	8773	200	66
cancer	10	9381	68	933
cancer	49	2899	60	508
cancer	129	2641	325	1043
cancer	282	5060	94	2168
cancer	141	3471	126	152
cancer	57	6350	79	24
cancer	59	3127	248	90
cancer	1966	1414	283	1934
cancer	132	7659	146	460
cancer	7	3598	41	3464
cancer	612	23877	290	591
cancer	3	4943	244	1124
cancer	326	4739	303	780
cancer	98	3653	143	639
cancer	76	8524	256	1245
cancer	652	5849	168	1240
cancer	4	18654	36	998
cancer	25	9461	124	55
cancer	205	6307	180	1791
cancer	133	4398	102	22
cancer	89	4651	284	160
cancer	115	4675	67	1690
cancer	382	4590	76	789
cancer	70	4912	13	52
cancer	177	5462	46	2713
cancer	11	5154	31	177
cancer	206	2761	181	434
cancer	31	2983	362	1677
cancer	230	8315	35	1322
cancer	163	7009	212	1296
cancer	160	5415	35	476
cancer	11	7566	30	1642
cancer	10	4217	236	106
cancer	99	5961	155	1335
cancer	29	10919	113	2670
cancer	167	15149	249	90
cancer	40	6383	208	1752
cancer	93	6588	98	356
cancer	18	4609	331	944
cancer	56	7232	72	1580
cancer	250	3071	117	315
cancer	157	11716	198	2698
cancer	0	6286	153	538
cancer	29	4768	86	63
cancer	302	2909	47	778
cancer	336	8713	194	675
cancer	199	3825	397	888
cancer	300	8732	73	782
cancer	321	11594	120	825
cancer	248	2506	207	989
cancer	22	9106	109	2561
cancer	89	4723	62	122
cancer	7	2500	434	29
cancer	229	10188	967	200
cancer	30	7916	137	83
cancer	4	5685	60	307
cancer	12	3271	19	880
cancer	207	2401	126	138
cancer	296	5840	174	362
cancer	297	10445	58	247
cancer	135	7372	11	693
cancer	564	3989	246	1072
cancer	78	4405	155	295
cancer	730	2583	25	1512
cancer	464	5598	447	484
cancer	62	6989	65	2010
cancer	148	3794	505	1698
cancer	200	3256	81	393
cancer	305	6713	69	446
cancer	66	3056	290	2234
cancer	22	3990	69	41
cancer	87	6245	27	2412
cancer	0	1956	71	850
cancer	239	5491	125	2089
cancer	1	4171	215	11
cancer	115	5621	95	674
cancer	8	3150	26	330
cancer	83	3644	193	870
cancer	84	5526	399	1204
cancer	63	4006	416	74
cancer	148	2203	26	212
cancer	642	2189	103	1396
cancer	105	13912	286	317
cancer	79	10114	127	1938
cancer	85	9202	348	142
cancer	191	5822	114	322
cancer	319	2494	58	1597
cancer	75	2598	61	193
cancer	6	4702	189	272
cancer	312	8423	84	1491
cancer	39	4776	33	1252
cancer	191	3942	243	787
cancer	63	13224	403	42
cancer	15	2318	69	36
cancer	214	4967	1042	857
cancer	64	3233	166	177
cancer	8	2107	356	225
cancer	321	6337	290	1352
cancer	110	2806	540	1018
cancer	155	11330	52	860
cancer	3	5093	172	457
cancer	25	5227	38	923
cancer	194	2751	91	142
cancer	289	5723	181	863
cancer	179	4677	234	280
cancer	94	2115	47	515
cancer	41	5059	137	1305
cancer	174	4058	133	407
cancer	38	4746	58	159
cancer	104	4712	251	938
cancer	3	3474	257	38
cancer	27	3381	46	599
cancer	73	7020	129	723
cancer	520	8908	207	1786
cancer	356	7631	441	233
cancer	85	4627	182	1557
cancer	7	4868	11	367
cancer	18	5526	17	645
cancer	33	10629	95	359
cancer	32	3215	137	253
cancer	0	3464	51	64
cancer	8	4082	112	383
cancer	9	6383	2	4364
cancer	5	6175	82	21
cancer	39	3141	119	136
cancer	41	2091	176	996
cancer	115	5308	184	611
cancer	102	14788	287	909
cancer	71	3860	307	304
cancer	176	2916	90	632
cancer	57	17793	15	317
cancer	35	8289	419	2417
cancer	376	3594	112	2995
cancer	309	6161	149	432
cancer	1	7840	47	7986
cancer	56	6332	657	1343
cancer	170	3680	446	856
cancer	6	7240	277	505
cancer	42	10471	9	611
cancer	339	7403	40	1869
cancer	61	2638	108	143
cancer	527	4400	456	1215
cancer	95	3035	4	228
cancer	51	3322	70	1058
cancer	99	8436	252	1242
cancer	124	6317	134	761
cancer	21	4193	42	367
cancer	7	3957	231	237
cancer	20	14515	561	524
cancer	126	8919	684	1078
cancer	25	8369	199	32
cancer	909	959	89	295
cancer	111	10245	115	915
cancer	141	4194	12	2502
cancer	143	4491	273	349
cancer	122	3948	68	1109
cancer	1	7383	325	87
cancer	55	2650	55	1044
cancer	4	6155	445	4366
cancer	145	10148	100	251
cancer	33	4238	216	1051
cancer	144	14131	282	269
cancer	114	3349	295	278
cancer	498	8324	129	2226
cancer	3	4753	32	1956
cancer	825	5248	28	394
cancer	193	4840	52	675
cancer	49	7674	492	674
cancer	789	18957	180	184
cancer	0	5675	28	140
cancer	3	8042	168	199
cancer	140	7442	105	1490
cancer	51	2832	117	653
cancer	14	6480	67	421
cancer	406	4545	114	628
cancer	32	7946	116	189
cancer	122	3762	183	206
cancer	6	6721	549	122
cancer	201	11340	160	324
cancer	314	4319	125	4817
cancer	331	6124	128	1570
cancer	66	3542	25	988
cancer	28	1652	14	1056
cancer	195	3797	285	638
cancer	39	3298	104	387
cancer	200	2422	320	236
cancer	12	4047	128	762
cancer	436	2750	190	780
cancer	33	6367	309	349
cancer	177	3351	274	485
cancer	8	8609	395	544
cancer	54	9589	81	540
cancer	563	8453	198	1457
cancer	51	4087	362	534
cancer	35	6182	112	509
cancer	11	8619	10	1199
cancer	299	8019	31	6875
cancer	80	9216	26	895
cancer	8	3890	11	242
cancer	4	3895	258	720
cancer	15	6626	165	583
cancer	891	6725	58	455
cancer	121	11577	77	623
cancer	39	5602	197	9308
cancer	101	5974	57	1242
cancer	4	2697	8	45
cancer	2	2750	15	351
cancer	51	7318	246	107
cancer	185	2370	10	255
cancer	47	1973	490	759
cancer	109	3753	363	891
cancer	20	2538	166	56
cancer	92	4023	79	1209
cancer	184	5172	115	70
cancer	103	8496	495	47
cancer	555	5795	101	1105
cancer	27	5517	144	72
cancer	305	3810	446	297
cancer	42	7223	143	1019
cancer	43	2909	109	266
cancer	125	4990	722	244
cancer	148	5805	173	830
cancer	295	7511	244	916
cancer	3	2632	18	143
cancer	183	7614	31	553
cancer	190	10282	663	887
cancer	47	7409	70	417
cancer	2	5100	318	63
cancer	268	6504	197	1024
cancer	136	3830	67	729
cancer	84	6683	90	933
cancer	23	4036	321	242
cancer	15	7680	206	608
cancer	40	13265	86	2679
cancer	177	4417	213	398
cancer	103	6861	197	818
cancer	107	6000	371	160
cancer	4	3643	14	428
cancer	393	14303	161	1687
cancer	173	4968	133	46
cancer	109	5458	73	2281
cancer	23	2971	26	305
cancer	145	4117	158	593
cancer	47	3338	22	350
cancer	66	4415	140	215
cancer	56	4211	134	277
cancer	94	4795	261	1162
cancer	86	10777	120	2961
cancer	242	4905	53	368
cancer	80	4240	134	644
cancer	22	4588	74	157
cancer	64	5573	24	3602
cancer	9	12195	48	224
cancer	91	7209	707	170
cancer	20	5655	126	746
cancer	7	4104	247	3281
cancer	41	4077	230	987
cancer	8	1736	20	2663
cancer	21	4117	461	220
cancer	690	2879	198	120
cancer	10	3620	132	612
cancer	371	4667	48	1483
cancer	174	9354	70	302
cancer	273	9939	330	741
cancer	43	12969	484	550
cancer	3	2354	67	228
cancer	39	2089	160	387
cancer	39	4102	46	153
cancer	29	5309	99	437
cancer	81	8768	4	407
cancer	224	3126	168	498
cancer	392	4928	207	438
cancer	133	6383	79	681
cancer	130	1895	218	376
cancer	125	5472	82	774
cancer	510	9623	54	442
cancer	132	12073	50	1911
cancer	149	6768	115	798
cancer	3	3009	46	811
cancer	366	2953	142	294
cancer	515	5218	195	291
cancer	391	4270	217	504
cancer	20	3637	231	799
cancer	38	2081	237	518
cancer	191	7382	399	1143
cancer	364	5447	427	1019
cancer	67	4369	320	140
cancer	419	9421	182	1383
cancer	10	2768	60	953
cancer	15	2357	43	9381
cancer	16	4391	482	386
cancer	225	3110	450	493
cancer	6	4739	240	949
cancer	42	3116	26	133
cancer	125	4193	160	1017
cancer	2	6979	43	759
cancer	412	8095	544	254
cancer	19	8107	486	1137
cancer	499	9437	14	43
cancer	265	3928	91	186
cancer	163	4082	84	878
cancer	1905	7357	288	2359
cancer	295	6304	113	350
cancer	44	3306	116	1254
cancer	137	6058	78	1178
cancer	331	16267	121	265
cancer	564	8290	171	1143
cancer	9	3717	23	515
cancer	154	3139	27	446
cancer	1	4264	9	886
cancer	109	9369	771	924
cancer	1	5666	504	585
cancer	51	2843	633	51
cancer	118	6194	176	709
cancer	39	7324	553	195
cancer	32	3302	198	8373
cancer	17	5862	75	277
cancer	15	6557	87	702
cancer	51	2258	13	388
cancer	78	5297	156	57
cancer	37	12979	16	89
cancer	291	2821	239	307
cancer	0	12533	136	153
cancer	53	2787	259	109
cancer	12	4417	206	301
cancer	190	5297	157	1183
cancer	18	5073	79	671
cancer	21	5559	214	657
cancer	108	3169	55	227
cancer	4	4132	142	1270
cancer	15	10645	414	131
cancer	144	6136	296	740
cancer	72	1373	145	729
cancer	11	4260	129	926
cancer	94	9576	160	370
cancer	179	4946	217	369
cancer	690	3181	152	1106
cancer	1327	2573	195	2143
cancer	185	2720	92	577
cancer	118	7320	337	1088
cancer	1	2437	28	188
cancer	287	10224	135	1929
cancer	248	5473	85	771
cancer	518	1747	35	2336
cancer	73	5761	31	1064
cancer	2	6162	7	1407
cancer	49	2760	409	508
cancer	34	6691	63	1197
cancer	486	10856	79	445
cancer	12	5288	309	432
cancer	29	3753	30	200
cancer	128	3667	106	587
cancer	1092	1706	156	1131
cancer	114	4751	151	1087
cancer	96	11551	422	735
cancer	44	3195	100	114
cancer	57	12522	112	1309
cancer	226	4695	315	706
cancer	220	6062	199	2269
cancer	210	8162	87	1945
cancer	178	3318	27	676
cancer	65	3553	11	297
cancer	4	5603	136	318
cancer	108	4266	183	859
cancer	123	6451	149	1178
cancer	88	5010	661	588
cancer	137	2695	446	552
cancer	27	2375	52	158
cancer	9	6266	306	4288
cancer	103	4445	40	531
cancer	99	5810	33	18
cancer	229	2858	413	1047
cancer	32	10304	140	41
cancer	22	4877	247	70
cancer	2	2268	295	1443
cancer	28	6983	326	994
cancer	125	6800	224	990
cancer	39	4474	11	3918
cancer	61	5168	505	115
cancer	11	5201	19	14
cancer	10	9933	104	222
cancer	196	3385	96	648
cancer	11	4534	75	202
cancer	36	6436	35	117
cancer	633	1750	101	897
cancer	15	2933	69	250
cancer	104	2459	115	368
cancer	146	1085	76	293
cancer	17	10564	68	1094
cancer	4	5040	349	17
cancer	150	15290	139	1340
cancer	50	5144	626	674
cancer	217	4076	307	234
cancer	1	3342	186	134
cancer	16	7766	131	538
cancer	249	5573	337	528
cancer	8	7508	81	671
cancer	98	3468	250	335
cancer	44	7558	94	360
cancer	30	4913	77	626
cancer	17	7652	53	1070
cancer	119	7465	230	375
cancer	729	2620	356	917
cancer	527	7157	25	301
cancer	8	8413	83	453
cancer	122	7525	270	1173
cancer	25	5803	326	401
cancer	113	9429	58	1414
cancer	96	4308	230	3763
cancer	276	5480	174	1361
cancer	113	8490	116	594
cancer	149	8784	36	1002
cancer	10	5798	71	34
cancer	206	20909	30	734
cancer	74	10290	217	133
cancer	108	3083	160	710
cancer	17	3353	231	1064
cancer	11	5985	65	94
cancer	181	3684	108	672
cancer	77	3859	250	289
cancer	247	5075	72	319
cancer	56	3556	65	477
cancer	36	8200	116	602
cancer	24	3377	394	1049
cancer	44	7845	248	148
cancer	468	4504	427	723
cancer	111	3043	605	1504
cancer	13	3112	591	831
cancer	9	5031	265	547
cancer	123	7446	14	1538
cancer	267	5939	48	862
cancer	43	3576	383	974
cancer	14	5393	142	447
cancer	320	4702	43	640
cancer	109	5586	115	159
cancer	41	5956	152	437
cancer	74	3427	136	810
cancer	24	3157	51	281
cancer	256	2859	65	532
cancer	38	2657	24	624
cancer	47	5838	83	2006
cancer	93	2315	30	305
cancer	188	7530	22	1651
cancer	88	3663	204	43
cancer	36	6802	214	814
cancer	326	7711	114	88
cancer	1261	1598	208	1705
cancer	309	11837	155	1367
cancer	48	3801	385	898
cancer	49	5196	254	734
cancer	47	3577	33	827
cancer	119	4650	67	869
cancer	24	7246	229	357
cancer	385	3355	153	808
cancer	220	4757	98	957
cancer	49	2581	19	820
cancer	1078	9166	158	138
cancer	36	4624	66	79
cancer	19	2255	131	449
cancer	67	5333	161	818
cancer	33	9525	451	511
cancer	514	10781	397	2305
cancer	10	4580	118	136
cancer	63	3764	82	302
cancer	22	5525	14	235
cancer	2	2690	21	83
cancer	17	4472	96	143
cancer	48	2538	63	345
cancer	37	5136	241	1247
cancer	286	4962	264	342
cancer	182	7391	22	486
cancer	66	4795	240	1125
cancer	114	2800	30	724
cancer	457	5292	177	441
cancer	133	2911	18	650
cancer	115	2732	583	205
cancer	21	7228	237	1219
cancer	29	3280	138	422
cancer	49	6179	17	1596
cancer	33	3118	486	34
cancer	39	12528	198	424
cancer	108	4364	263	99
cancer	36	4545	109	706
cancer	468	3325	63	451
cancer	4	3559	178	926
cancer	249	8909	367	1813
cancer	73	4084	34	547
cancer	25	7841	350	71
cancer	87	7113	309	545
cancer	5	6189	59	770
cancer	0	10746	52	2613
cancer	101	8007	421	261
cancer	85	7364	348	2577
cancer	57	6568	147	546
cancer	526	9761	126	865
cancer	333	10733	55	1812
cancer	19	16571	80	444
cancer	47	3767	24	426
cancer	49	5688	163	1721
cancer	45	8120	164	60
cancer	14	1937	35	440
cancer	38	9507	95	1992
cancer	4	1137	78	373
cancer	128	3848	11	436
cancer	31	7518	187	56
cancer	87	9853	402	1992
cancer	90	2871	116	207
cancer	64	3197	324	1025
cancer	155	6119	594	660
cancer	152	3992	18	708
cancer	137	9140	438	945
cancer	17	5706	85	226
cancer	41	1971	116	418
cancer	351	6733	47	866
cancer	25	9328	22	199
cancer	0	4613	97	686
cancer	114	2255	88	1841
cancer	367	7533	682	276
cancer	80	7894	137	636
cancer	12	8493	46	265
cancer	9	6033	53	160
cancer	233	5684	252	2488
cancer	6	4621	326	21
cancer	29	9239	284	750
cancer	67	8446	134	421
cancer	137	4037	536	544
cancer	74	8934	149	2187
cancer	139	5723	89	681
cancer	49	4661	72	432
cancer	324	2418	320	1147
cancer	34	6246	72	111
cancer	119	6846	28	587
cancer	41	4852	125	348
cancer	48	4142	201	395
cancer	28	4211	123	381
cancer	123	2578	13	815
cancer	30	9055	199	824
cancer	262	4619	418	752
cancer	27	16076	743	4738
cancer	13	5396	76	1980
cancer	442	4605	238	1034
cancer	195	4659	187	490
cancer	5	3800	349	1425
cancer	864	8603	201	815
cancer	37	6565	321	81
cancer	147	3820	207	604
cancer	63	7443	24	1001
cancer	32	2783	177	1072
cancer	328	3418	71	328
cancer	86	3629	75	1308
cancer	44	6255	124	2098
cancer	138	7710	111	732
cancer	218	3183	93	139
cancer	70	3141	88	672
cancer	22	2346	274	469
cancer	353	12636	344	1457
cancer	72	5041	81	843
cancer	96	9563	61	408
cancer	113	2377	32	363
cancer	81	3707	158	986
cancer	23	8327	270	3279
cancer	134	2539	211	1367
cancer	69	3897	210	660
cancer	65	8061	190	682
cancer	662	2908	38	813
cancer	154	4048	168	347
cancer	361	5016	610	2222
cancer	70	6565	530	536
cancer	48	6899	436	1546
cancer	168	5253	85	3760
cancer	60	9366	13	1204
cancer	19	4655	140	23
cancer	184	3217	231	727
cancer	8	4530	295	288
cancer	1	3982	60	266
cancer	67	4656	113	1242
cancer	59	5620	139	88
cancer	99	3025	560	155
cancer	91	12581	392	868
cancer	449	4555	32	2594
cancer	227	9842	344	1335
cancer	2	1694	74	465
cancer	31	11364	173	1709
cancer	4	15451	295	2728
cancer	7	7468	103	114
cancer	9	8032	238	49
cancer	17	2538	63	779
cancer	779	3689	421	1443
cancer	19	4865	321	47
cancer	46	5515	8	1157
cancer	17	4967	132	343
cancer	28	7752	284	84
cancer	33	6015	82	2896
cancer	38	6790	99	2283
cancer	20	3812	40	473
cancer	80	4416	342	772
cancer	293	2830	48	127
cancer	67	5215	40	473
cancer	140	5022	70	697
cancer	48	3246	41	1315
cancer	39	5185	312	1112
cancer	184	4284	91	715
cancer	9	6411	56	1255
cancer	29	6412	392	1453
cancer	49	6428	153	771
cancer	1	12698	138	194
cancer	179	2063	24	389
cancer	518	6176	694	1569
cancer	136	3103	126	1263
cancer	334	5528	189	1262
cancer	750	6535	318	153
cancer	230	4629	792	387
cancer	7	5951	109	345
cancer	55	7696	284	410
cancer	532	6770	138	1207
cancer	213	3896	75	213
cancer	7	2305	23	880
cancer	276	8586	26	497
cancer	73	6036	105	2827
cancer	409	2858	120	1454
cancer	601	2592	69	587
cancer	0	6931	189	226
cancer	6	11703	175	51
cancer	204	4158	103	820
cancer	180	6220	251	236
cancer	10	2930	3	721
cancer	215	10749	48	967
cancer	3	15613	31	603
cancer	537	6948	145	1171
cancer	96	7524	49	401
cancer	196	5447	28	560
cancer	301	3329	178	353
cancer	25	2816	171	176
cancer	148	4681	128	959
cancer	12	2884	22	424
cancer	81	5667	29	1926
cancer	26	27957	145	442
cancer	141	7050	98	744
cancer	68	8812	389	386
cancer	37	4943	156	955
cancer	51	1525	324	490
cancer	228	2599	151	868
cancer	86	2524	224	209
cancer	1	4138	215	1129
cancer	107	2809	153	594
cancer	134	8449	69	1500
cancer	18	5132	68	168
cancer	440	3454	192	359
cancer	23	1807	249	328
cancer	365	3076	104	309
cancer	154	4566	186	641
cancer	174	5475	43	872
cancer	8	10885	299	1065
cancer	213	6395	61	852
cancer	213	4503	65	782
cancer	442	3850	126	676
cancer	21	3463	21	1504
cancer	213	3311	75	1054
cancer	4	10672	82	175
cancer	108	8550	134	1332
cancer	144	10395	166	1033
cancer	93	9782	81	115
cancer	1048	2466	190	161
cancer	112	4397	673	145
cancer	61	3993	234	658
cancer	85	6394	148	1047
cancer	68	3330	318	1483
cancer	43	6304	50	608
cancer	7	3804	53	261
cancer	48	23149	21	400
cancer	37	3254	113	631
cancer	2	4768	265	846
cancer	46	4672	99	179
cancer	320	8443	9	101
cancer	66	9032	176	5411
cancer	27	6799	136	115
cancer	0	2467	64	489
cancer	9	5716	261	290
cancer	52	8891	5	1329
cancer	228	9949	209	1915
cancer	6	4711	137	247
cancer	143	8953	119	820
cancer	24	4128	111	1863
cancer	614	6315	59	489
cancer	353	4675	147	424
cancer	420	4418	411	831
cancer	422	7259	52	1374
cancer	379	3003	169	762
cancer	453	7299	28	206
cancer	29	3912	63	845
cancer	195	7675	207	2095
cancer	36	4659	593	263
cancer	63	2819	292	660
cancer	279	4230	156	409
cancer	60	8016	72	1303
cancer	66	4410	129	162
cancer	27	9070	277	99
cancer	29	3995	281	223
cancer	59	2762	166	229
cancer	113	18181	395	32
cancer	26	2481	198	196
cancer	145	5972	305	178
cancer	156	6504	86	314
cancer	256	2214	16	699
cancer	0	7981	199	63
cancer	441	8141	621	998
cancer	361	7280	48	1283
cancer	341	5656	322	1551
cancer	51	5169	56	60
cancer	103	12713	217	145
cancer	190	3190	133	368
cancer	242	3149	278	993
cancer	799	10084	287	362
cancer	149	2407	814	287
cancer	4	9706	58	136
cancer	0	12221	83	2416
cancer	156	4147	104	467
cancer	133	4858	69	201
cancer	31	2237	17	453
cancer	69	7747	80	396
cancer	352	3373	165	721
cancer	245	4809	450	432
cancer	259	6131	90	1015
cancer	648	14577	507	1351
cancer	4	5009	106	93
cancer	108	4835	372	407
cancer	4	5293	118	18
cancer	305	5920	246	2605
cancer	16	4464	60	93
cancer	1	5985	24	1824
cancer	78	5428	177	524
cancer	13	6690	95	694
cancer	30	4442	121	201
cancer	65	7744	216	1653
cancer	105	5291	314	286
cancer	5	6091	318	659
cancer	117	9345	12	698
cancer	501	8240	67	598
cancer	64	9083	11	109
cancer	61	5932	164	188
cancer	166	3417	33	802
cancer	170	4209	90	698
cancer	72	3176	52	316
cancer	45	3032	10	166
cancer	13	6848	81	99
cancer	124	5048	217	204
cancer	141	3920	143	948
cancer	78	6948	57	2209
cancer	211	7021	249	507
cancer	86	4792	81	896
cancer	9	1269	219	64
cancer	38	5928	173	366
cancer	27	2799	92	1009
cancer	22	6807	141	1993
cancer	43	3804	40	98
cancer	123	5589	56	806
cancer	179	5003	317	345
cancer	115	7402	70	660
cancer	27	5608	205	659
cancer	6	7077	376	86
cancer	123	3297	390	194
cancer	4	2778	49	404
cancer	56	3197	52	85
cancer	36	2527	42	441
cancer	7	1753	71	36
cancer	40	3588	98	50
cancer	502	11588	286	2340
cancer	6	5346	232	37
cancer	500	4058	14	79
cancer	287	3850	127	548
cancer	159	2598	441	244
cancer	72	3831	62	461
cancer	131	9231	305	3515
cancer	70	5253	72	851
cancer	25	4236	84	849
cancer	59	4349	142	626
cancer	138	3009	293	775
cancer	27	4206	48	69
cancer	143	9653	219	481
cancer	5	4081	28	1631
cancer	12	10972	300	190
cancer	841	3027	251	1026
cancer	905	21126	275	1121
cancer	187	5297	107	879
cancer	131	11165	46	1136
cancer	272	5070	28	1310
cancer	66	2365	121	93
cancer	54	3651	230	299
cancer	8	5785	106	1300
cancer	714	6663	231	1714
cancer	183	4104	44	1954
cancer	1	2032	16	131
cancer	40	2065	543	148
cancer	8	2190	12	650
cancer	314	6394	424	326
cancer	50	7590	68	404
cancer	9	6310	127	1135
cancer	39	4820	844	1252
cancer	160	5281	142	151
cancer	21	2983	246	430
cancer	6	7297	426	417
cancer	161	9101	132	574
cancer	53	5446	393	432
cancer	242	9323	103	827
cancer	5	5059	263	1014
cancer	65	4995	72	127
cancer	17	2903	27	310
cancer	221	13454	359	1582
cancer	137	3154	844	1232
cancer	2075	6592	346	446
cancer	72	4244	210	301
cancer	50	8058	543	490
cancer	176	9215	97	1637
cancer	12	11216	37	634
cancer	94	6019	214	215
cancer	20	6901	540	527
cancer	12	4188	149	376
cancer	69	7452	19	887
cancer	529	3831	173	186
cancer	53	6417	49	1493
cancer	113	8704	193	394
cancer	393	6055	116	1059
cancer	313	5827	859	1354
cancer	323	2813	62	481
cancer	61	3865	28	497
cancer	34	3633	311	851
cancer	118	3390	120	1039
cancer	25	2279	50	624
cancer	173	12314	183	483
cancer	260	5985	94	1523
cancer	135	3066	611	352
cancer	23	4251	80	968
cancer	45	4922	229	1312
cancer	519	3258	166	70
cancer	145	1685	49	200
cancer	21	7159	126	312
cancer	64	6744	60	55
cancer	69	5443	85	582
cancer	278	6602	140	316
cancer	142	4513	20	654
cancer	106	7448	62	1132
cancer	1221	2246	133	5905
cancer	15	1506	60	29
cancer	17	3069	636	345
cancer	92	3905	24	602
cancer	932	6798	179	703
cancer	67	1419	37	642
cancer	374	7393	127	1386
cancer	246	14281	269	143
cancer	159	3201	638	441
cancer	282	2411	383	378
cancer	133	4259	119	395
cancer	195	6097	489	449
cancer	18	4984	349	73
cancer	26	6301	139	710
cancer	269	5159	49	1804
cancer	92	5741	70	3043
cancer	7	1870	60	191
cancer	469	3504	140	1538
cancer	64	3181	23	1200
cancer	4	3847	215	1586
cancer	29	7153	18	1767
cancer	196	12929	207	409
cancer	10	2172	27	578
cancer	20	2576	52	731
cancer	66	6402	190	1293
cancer	204	9769	130	1246
cancer	74	5179	82	408
cancer	53	5581	180	717
cancer	45	4483	61	55
cancer	10	4220	66	410
cancer	65	3609	247	236
cancer	202	6792	120	390
cancer	74	6590	247	1079
cancer	315	4023	84	348
cancer	75	4591	139	412
cancer	402	3058	45	628
cancer	180	6981	192	189
cancer	5	6265	105	291
cancer	131	3639	226	391
cancer	54	4286	402	264
cancer	84	4364	120	840
cancer	127	7375	197	175
cancer	278	8427	212	163
